# Supplementary material for: Comparative transcriptomic analysis provides insights into the molecular basis underlying pre-harvest sprouting in rice
Source: BMC Genomics. 2022 Nov 24;23:771. doi: 10.1186/s12864-022-08998-4 (PMC9701047; doi:10.1186/s12864-022-08998-4)
Supplement: Supplementary file 4 — Additional file 4: Table S3. The list of annotated DEGs identified in MXXZ-C vs. JXZ-C. [file 12864_2022_8998_MOESM4_ESM.xls]

## Sheet: All annotated DEGs
Table S3-1 The list of all annotated DEGs identified in MXXZ-C vs. JXZ-C.
Gene ID	JXZ-C1_Count	JXZ-C2_Count	JXZ-C3_Count	MXXZ-C1_Count	MXXZ-C2_Count	MXXZ-C3_Count	JXZ-C1_FPKM	JXZ-C2_FPKM	JXZ-C3_FPKM	MXXZ-C1_FPKM	MXXZ-C2_FPKM	MXXZ-C3_FPKM	FDR	log2FC	regulated	COG_class	COG_class_annotation	GO_annotation	KEGG_annotation	KEGG_pathway_annotation	KOG_class	KOG_class_annotation	Pfam_annotation	Swiss-Prot_annotation	eggNOG_class	eggNOG_class_annotation	NR_annotation
Oryza_sativa_newGene_1522	1300	1314	1565	466	385	579	14.4046	12.6369	18.3881	5.15494	3.60146	6.01604	4.85612e-10	-1.24251	down	--	--	--	--	--	--	--	--	--	--	--	hypothetical protein [Oryza sativa Japonica Group]
BGIOSGA022555	21	19	22	95	107	157	1.03197	0.949461	1.14029	5.1267	4.85084	8.1361	1.05559e-10	2.39122	up	--	--	Molecular Function: electron carrier activity (GO:0009055);;	K22128|9.3e-06|smo:SELMODRAFT_404967|K22128 piezo-type mechanosensitive ion channel component 1/2 | (RefSeq) hypothetical protein	--	--	--	Plastocyanin-like domain	Blue copper protein OS=Pisum sativum OX=3888 PE=2 SV=1	S	Function unknown	hypothetical protein OsI_22178 [Oryza sativa Indica Group]
BGIOSGA004510	204	214	197	329	877	425	3.3642	3.46348	3.31288	5.73795	12.959	7.13685	0.000392975	1.46512	up	[H]	Coenzyme transport and metabolism	Molecular Function: molecular_function (GO:0003674);; Molecular Function: catalytic activity (GO:0003824);; Biological Process: biological_process (GO:0008150);; Biological Process: response to radiation (GO:0009314);; Biological Process: response to light stimulus (GO:0009416);; Biological Process: response to abiotic stimulus (GO:0009628);; Biological Process: response to endogenous stimulus (G…	K14487|0.0e+00|dosa:Os01t0764800-01|K14487 auxin responsive GH3 gene family | (RefSeq) Os01g0764800; Similar to Nt-gh3 deduced protein.	Plant hormone signal transduction (ko04075)	--	--	GH3 auxin-responsive promoter	Probable indole-3-acetic acid-amido synthetase GH3.2 OS=Oryza sativa subsp. japonica OX=39947 GN=GH3.2 PE=2 SV=1	S	Function unknown	probable indole-3-acetic acid-amido synthetase GH3.2 [Oryza sativa Japonica Group]
BGIOSGA012037	592	429	427	197	157	124	21.5716	15.3095	15.812	7.57034	5.10138	4.56319	1.15031e-05	-1.24561	down	--	--	--	K05956|6.2e-16|dosa:Os11t0523500-00|K05956 geranylgeranyl transferase type-2 subunit beta [EC:2.5.1.60] | (RefSeq) Os11g0523500; Terpenoid cylases/protein prenyltransferase alpha-alpha toroid domain containing protein.	--	[O]	Posttranslational modification, protein turnover, chaperones	--	Geranylgeranyl transferase type-2 subunit beta 1 OS=Arabidopsis thaliana OX=3702 GN=RGTB1 PE=1 SV=1	--	--	hypothetical protein OsI_10363 [Oryza sativa Indica Group]
BGIOSGA034889	2093	1513	1390	614	496	432	19.6262	13.8972	13.2676	6.08324	4.15417	4.11623	6.64572e-09	-1.36211	down	[U]	Intracellular trafficking, secretion, and vesicular transport	Molecular Function: protein serine/threonine kinase activity (GO:0004674);; Molecular Function: ATP binding (GO:0005524);; Cellular Component: integral component of membrane (GO:0016021);;	K20181|1.4e-87|mtr:MTR_5g026090|K20181 vacuolar protein sorting-associated protein 18 | (RefSeq) vacuolar sorting-associated-like protein	--	--	--	Protein kinase domain	Putative receptor-like protein kinase At3g47110 OS=Arabidopsis thaliana OX=3702 GN=At3g47110 PE=3 SV=1	S	Function unknown	hypothetical protein OsI_35284 [Oryza sativa Indica Group]
BGIOSGA016270	409	335	271	45	59	43	56.1593	45.032	37.8512	6.40199	7.22398	5.90404	3.32612e-14	-2.27773	down	--	--	Molecular Function: DNA binding (GO:0003677);; Cellular Component: nucleus (GO:0005634);; Molecular Function: protein dimerization activity (GO:0046983);;	K09264|9.6e-09|pda:103719124|K09264 MADS-box transcription factor, plant | (RefSeq) MADS-box transcription factor 51-like isoform X1	--	[K]	Transcription	SRF-type transcription factor (DNA-binding and dimerisation domain)	Agamous-like MADS-box protein AGL8 homolog OS=Solanum commersonii OX=4109 GN=SCM1 PE=2 SV=1	--	--	hypothetical protein OsI_15654 [Oryza sativa Indica Group]
Oryza_sativa_newGene_670	53	98	150	379	378	297	0.567488	1.02171	1.62893	4.37876	3.60639	3.22432	1.92019e-06	1.79744	up	--	--	--	--	--	--	--	--	--	--	--	hypothetical protein EE612_038532, partial [Oryza sativa]
BGIOSGA017012	1177	1169	1086	485	259	525	14.9669	14.5649	14.0632	6.51965	2.94076	6.79402	2.11245e-05	-1.12199	down	--	--	--	K15200|1.6e-125|osa:9269796|K15200 general transcription factor 3C polypeptide 2 | (RefSeq) uncharacterized protein LOC9269796 isoform X1	--	[Z]	Cytoskeleton	Tubulin domain	--	L	Replication, recombination and repair	hypothetical protein OsI_17172 [Oryza sativa Indica Group]
BGIOSGA028077	201	236	211	23	13	10	1.54404	1.78112	1.65402	0.180173	0.083096	0.074571	6.35444e-20	-3.09632	down	[M]	Cell wall/membrane/envelope biogenesis	Molecular Function: protein kinase activity (GO:0004672);; Molecular Function: ATP binding (GO:0005524);; Biological Process: defense response (GO:0006952);; Molecular Function: ADP binding (GO:0043531);;	K13418|7.8e-133|dosa:Os08t0174700-01|K13418 somatic embryogenesis receptor kinase 1 [EC:2.7.10.1 2.7.11.1] | (RefSeq) Os08g0174700; Similar to SERK1 (Fragment).	--	--	--	NB-ARC domain	LRR receptor kinase BAK1 OS=Oryza sativa subsp. indica OX=39946 GN=BAK1 PE=2 SV=1	T	Signal transduction mechanisms	hypothetical protein OsI_28004 [Oryza sativa Indica Group]
BGIOSGA032316	270	196	104	46	15	17	6.59599	4.6728	2.56761	1.17153	0.31674	0.398252	2.22521e-05	-2.01752	down	--	--	Molecular Function: protein binding (GO:0005515);;	--	--	--	--	F-box-like	--	--	--	hypothetical protein OsI_32685 [Oryza sativa Indica Group]
Oryza_sativa_newGene_6235	0	0	0	348	184	183	0	0	0	7.20579	3.21745	3.6356	1.79901e-39	5.70336	up	--	--	Molecular Function: nucleic acid binding (GO:0003676);; Molecular Function: protein kinase activity (GO:0004672);; Molecular Function: ATP binding (GO:0005524);; Cellular Component: integral component of membrane (GO:0016021);;	K13116|4.4e-21|pda:103723897|K13116 ATP-dependent RNA helicase DDX41 [EC:3.6.4.13] | (RefSeq) DEAD-box ATP-dependent RNA helicase 35-like	--	[R]	General function prediction only	--	--	L	Replication, recombination and repair	uncharacterized protein LOC112939019 [Oryza sativa Japonica Group]
BGIOSGA006846	151	165	212	341	698	439	6.5468	7.0221	9.35695	15.6557	27.117	19.3913	1.24931e-05	1.57377	up	--	--	--	--	--	[K]	Transcription	--	--	S	Function unknown	hypothetical protein OsI_06437 [Oryza sativa Indica Group]
Oryza_sativa_newGene_2631	58	42	67	0	0	0	1.71767	1.21817	2.02305	0	0	0	5.42743e-11	-3.37588	down	--	--	--	--	--	--	--	--	--	--	--	hypothetical protein [Oryza sativa Japonica Group]
BGIOSGA031347	149	179	257	435	595	563	5.92951	6.99269	10.401	18.3273	21.1943	22.8092	1.43285e-07	1.57955	up	--	--	--	--	--	--	--	PLATZ transcription factor	--	S	Function unknown	uncharacterized protein LOC4349481 [Oryza sativa Japonica Group]
BGIOSGA033609	271	225	149	1	49	17	16.9966	13.7808	9.46292	0.06551	2.71617	1.03319	0.00801478	-1.62525	down	--	--	Molecular Function: protein binding (GO:0005515);;	K10523|1.4e-52|osa:107279274|K10523 speckle-type POZ protein | (RefSeq) uncharacterized protein LOC107279274	--	[DR]	Cell cycle control, cell division, chromosome partitioning;; General function prediction only	BTB/POZ domain	BTB/POZ and MATH domain-containing protein 1 OS=Arabidopsis thaliana OX=3702 GN=BPM1 PE=1 SV=1	S	Function unknown	hypothetical protein OsI_36877 [Oryza sativa Indica Group]
Oryza_sativa_newGene_4339	0	0	0	273	206	328	0	0	0	3.53797	2.08645	4.19359	1.86897e-48	6.08748	up	--	--	--	--	--	--	--	--	--	--	--	hypothetical protein [Oryza sativa Japonica Group]
BGIOSGA017548	155	198	197	181	1082	655	7.0412	8.80551	9.11155	8.71312	44.0939	30.347	0.00128794	1.62332	up	--	--	Cellular Component: integral component of membrane (GO:0016021);;	K03251|4.0e-82|obr:102709085|K03251 translation initiation factor 3 subunit D | (RefSeq) eukaryotic translation initiation factor 3 subunit D-like	RNA transport (ko03013)	--	--	Cold acclimation protein WCOR413	Cold-regulated 413 inner membrane protein 1, chloroplastic OS=Arabidopsis thaliana OX=3702 GN=COR413IM1 PE=1 SV=1	S	Function unknown	hypothetical protein OsI_21013 [Oryza sativa Indica Group]
Oryza_sativa_newGene_242	481	262	315	39	70	50	3.30498	1.60419	2.05684	0.251044	0.388157	0.351896	5.86313e-09	-2.12064	down	--	--	Molecular Function: nucleic acid binding (GO:0003676);; Biological Process: DNA integration (GO:0015074);;	K11593|5.2e-45|dct:110097550|K11593 eukaryotic translation initiation factor 2C | (RefSeq) protein argonaute 1A-like	--	[R]	General function prediction only	GAG-pre-integrase domain	Retrovirus-related Pol polyprotein from transposon RE2 OS=Arabidopsis thaliana OX=3702 GN=RE2 PE=4 SV=1	K	Transcription	unnamed protein product [Ananas comosus var. bracteatus]
BGIOSGA011305	66	168	219	378	792	508	1.0726	2.67659	3.61178	6.49346	11.5172	8.39229	5.55743e-05	1.78192	up	--	--	Biological Process: microtubule cytoskeleton organization (GO:0000226);; Biological Process: microtubule bundle formation (GO:0001578);; Biological Process: liver development (GO:0001889);; Biological Process: heart looping (GO:0001947);; Biological Process: morphogenesis of an epithelium (GO:0002009);; Biological Process: regionalization (GO:0003002);; Biological Process: heart morphogenesis (GO…	--	--	[T]	Signal transduction mechanisms	Leucine Rich repeats (2 copies)	--	S	Function unknown	hypothetical protein OsI_10329 [Oryza sativa Indica Group]
BGIOSGA017652	129	142	218	455	206	316	5.57921	6.01541	9.63595	20.8781	7.98484	13.9438	0.00328357	1.10407	up	--	--	Cellular Component: endoplasmic reticulum (GO:0005783);; Cellular Component: Golgi apparatus (GO:0005794);; Biological Process: response to ethylene (GO:0009723);; Biological Process: regulation of ethylene-activated signaling pathway (GO:0010104);; Cellular Component: integral component of membrane (GO:0016021);;	K20726|5.6e-135|dosa:Os05t0539800-01|K20726 transmembrane protein 222 | (RefSeq) Os05g0539800; Protein of unknown function DUF778 family protein.	MAPK signaling pathway - plant (ko04016)	[S]	Function unknown	Protein of unknown function (DUF778)	Protein REVERSION-TO-ETHYLENE SENSITIVITY1 OS=Arabidopsis thaliana OX=3702 GN=RTE1 PE=1 SV=1	S	Function unknown	protein REVERSION-TO-ETHYLENE SENSITIVITY1 [Oryza sativa Japonica Group]
BGIOSGA033473	33	47	45	248	163	204	1.34687	1.88076	1.88058	10.9118	6.05907	8.63922	5.59215e-16	2.33309	up	--	--	--	--	--	--	--	--	--	S	Function unknown	hypothetical protein OsI_34714 [Oryza sativa Indica Group]
BGIOSGA003623	82	112	87	0	0	0	5.95458	7.96521	6.45402	0	0	0	1.40887e-18	-4.19955	down	--	--	--	--	--	--	--	--	--	--	--	hypothetical protein OsI_02154 [Oryza sativa Indica Group]
Oryza_sativa_newGene_357	83	73	95	13	19	31	0.865573	0.79227	1.13056	0.13792	0.170401	0.317906	0.00390546	-1.38896	down	--	--	Molecular Function: nucleic acid binding (GO:0003676);; Molecular Function: ATP binding (GO:0005524);; Biological Process: DNA integration (GO:0015074);; Molecular Function: ATPase activity (GO:0016887);;	K12447|3.2e-105|thj:104808371|K12447 UDP-sugar pyrophosphorylase [EC:2.7.7.64] | (RefSeq) uncharacterized protein LOC104808371	Pentose and glucuronate interconversions (ko00040);; Galactose metabolism (ko00052);; Ascorbate and aldarate metabolism (ko00053);; Amino sugar and nucleotide sugar metabolism (ko00520)	[R]	General function prediction only	Reverse transcriptase (RNA-dependent DNA polymerase)	Retrovirus-related Pol polyprotein from transposon RE1 OS=Arabidopsis thaliana OX=3702 GN=RE1 PE=2 SV=1	L	Replication, recombination and repair	retrotransposon protein, putative, unclassified, expressed [Oryza sativa Japonica Group]
BGIOSGA038062	94	54	42	5	4	15	0.93181	0.527118	0.424939	0.042271	0.032956	0.149345	0.00134147	-1.79696	down	[R]	General function prediction only	Biological Process: defense response (GO:0006952);; Molecular Function: ADP binding (GO:0043531);;	K13457|0.0e+00|osa:4350733|K13457 disease resistance protein RPM1 | (RefSeq) disease resistance protein RPM1	Plant-pathogen interaction (ko04626)	[T]	Signal transduction mechanisms	NB-ARC domain	Disease resistance protein RPM1 OS=Arabidopsis thaliana OX=3702 GN=RPM1 PE=1 SV=1	S	Function unknown	NB-ARC domain containing protein [Oryza sativa Japonica Group]
BGIOSGA021094	4	15	5	113	82	79	0.364998	1.29473	0.444473	11.0524	6.80599	7.4182	7.09718e-10	2.80721	up	--	--	Molecular Function: structural constituent of ribosome (GO:0003735);; Cellular Component: ribosome (GO:0005840);; Biological Process: translation (GO:0006412);;	K02946|2.2e-49|dosa:Os12t0517200-01|K02946 small subunit ribosomal protein S10 | (RefSeq) Os12g0517200; Mitochondrial ribosomal protein S10.	Ribosome (ko03010)	--	--	Ribosomal protein S10p/S20e	Ribosomal protein S10, mitochondrial OS=Pisum sativum OX=3888 GN=RPS10 PE=2 SV=1	S	Function unknown	uncharacterized protein LOC107281219 [Oryza sativa Japonica Group]
BGIOSGA027044	81	65	91	22	28	18	8.9395	7.00208	10.1489	2.52994	2.73698	1.95561	0.00619167	-1.26532	down	--	--	--	--	--	--	--	--	--	S	Function unknown	uncharacterized protein LOC4345453 [Oryza sativa Japonica Group]
BGIOSGA003364	50	102	59	136	622	317	2.42992	4.86221	2.90089	7.00753	27.1688	15.7285	3.95165e-05	2.00915	up	--	--	Molecular Function: DNA binding (GO:0003677);; Molecular Function: transcription factor activity, sequence-specific DNA binding (GO:0003700);; Cellular Component: nucleus (GO:0005634);;	K09286|1.2e-48|pda:103703634|K09286 EREBP-like factor | (RefSeq) LOW QUALITY PROTEIN: ethylene-responsive transcription factor ERF071-like	--	--	--	AP2 domain	Ethylene-responsive transcription factor ERF071 OS=Arabidopsis thaliana OX=3702 GN=ERF071 PE=2 SV=1	K	Transcription	hypothetical protein OsI_01597 [Oryza sativa Indica Group]
BGIOSGA031288	0	0	0	240	174	261	0	0	0	6.40416	3.91621	6.70628	2.13231e-44	5.8824	up	--	--	--	--	--	--	--	--	--	--	--	hypothetical protein OsI_32435 [Oryza sativa Indica Group]
BGIOSGA002393	0	2	0	880	418	546	0	0.025683	0	23.642	9.49832	14.1055	3.72074e-66	6.74984	up	--	--	--	--	--	--	--	Protein of unknown function (DUF1668)	--	S	Function unknown	hypothetical protein OsI_00398 [Oryza sativa Indica Group]
BGIOSGA007891	115	88	176	218	3132	1200	2.75451	2.05862	4.29012	5.5249	67.2938	29.3293	0.00531388	1.70974	up	--	--	Molecular Function: nutrient reservoir activity (GO:0045735);;	--	--	--	--	Cupin	Glutelin type-B 2 OS=Oryza sativa subsp. japonica OX=39947 GN=GLUB2 PE=2 SV=2	S	Function unknown	hypothetical protein OsI_06570 [Oryza sativa Indica Group]
BGIOSGA011940	15	14	26	44	184	76	0.3012	0.274073	0.563826	0.990179	3.5346	1.64475	0.000454076	1.89819	up	[G]	Carbohydrate transport and metabolism	Biological Process: carbohydrate transport (GO:0008643);; Molecular Function: symporter activity (GO:0015293);; Cellular Component: integral component of membrane (GO:0016021);;	--	--	[G]	Carbohydrate transport and metabolism	MFS/sugar transport protein	--	S	Function unknown	hypothetical protein OsI_10171 [Oryza sativa Indica Group]
BGIOSGA001626	33	48	60	1203	1285	1592	1.48985	2.13063	2.79748	58.7475	53.0879	74.8318	3.71241e-86	4.78377	up	[O]	Posttranslational modification, protein turnover, chaperones	Molecular Function: molecular_function (GO:0003674);; Molecular Function: catalytic activity (GO:0003824);; Molecular Function: glutathione transferase activity (GO:0004364);; Molecular Function: protein binding (GO:0005515);; Cellular Component: cellular_component (GO:0005575);; Cellular Component: intracellular (GO:0005622);; Cellular Component: cell (GO:0005623);; Cellular Component: cytoplasm…	K00799|2.3e-122|dosa:Os01t0371200-01|K00799 glutathione S-transferase [EC:2.5.1.18] | (RefSeq) Os01g0371200, GSTF1, PHI_GLUTATHIONE_S-TRANSFERASE_1; Similar to Glutathione-S-transferase 19E50.	Glutathione metabolism (ko00480)	[O]	Posttranslational modification, protein turnover, chaperones	Glutathione S-transferase, C-terminal domain	Probable glutathione S-transferase GSTF1 OS=Oryza sativa subsp. japonica OX=39947 GN=GSTF1 PE=1 SV=2	O	Posttranslational modification, protein turnover, chaperones	probable glutathione S-transferase GSTF1 [Oryza sativa Japonica Group]
BGIOSGA002746	230	235	180	1887	1448	1362	14.7869	14.8028	11.7402	128.299	83.2657	89.1373	2.34185e-57	3.00823	up	[J]	Translation, ribosomal structure and biogenesis	Molecular Function: structural constituent of ribosome (GO:0003735);; Biological Process: translation (GO:0006412);; Cellular Component: large ribosomal subunit (GO:0015934);;	K02898|3.2e-78|osa:4325478|K02898 large subunit ribosomal protein L26e | (RefSeq) 60S ribosomal protein L26-1	Ribosome (ko03010)	[J]	Translation, ribosomal structure and biogenesis	Ribosomal proteins L26 eukaryotic, L24P archaeal	60S ribosomal protein L26-1 OS=Arabidopsis thaliana OX=3702 GN=RPL26A PE=2 SV=2	J	Translation, ribosomal structure and biogenesis	60S ribosomal protein L26-1 [Oryza sativa Japonica Group]
BGIOSGA018789	233	328	363	652	1580	527	9.32087	12.845	14.7632	27.5824	56.5488	21.4191	0.000303303	1.57291	up	--	--	Cellular Component: cellular_component (GO:0005575);; Cellular Component: intracellular (GO:0005622);; Cellular Component: cell (GO:0005623);; Cellular Component: cytoplasm (GO:0005737);; Cellular Component: vacuole (GO:0005773);; Cellular Component: lipid droplet (GO:0005811);; Biological Process: organelle organization (GO:0006996);; Biological Process: biological_process (GO:0008150);; Biologi…	K17616|1.8e-22|oeu:111404463|K17616 CTD small phosphatase-like protein 2 [EC:3.1.3.-] | (RefSeq) uncharacterized protein LOC111404463	--	--	--	Rubber elongation factor protein (REF)	REF/SRPP-like protein OsI_017815 OS=Oryza sativa subsp. indica OX=39946 GN=OsI_017815 PE=3 SV=1	S	Function unknown	RecName: Full=REF/SRPP-like protein OsI_017815 [Oryza sativa Indica Group]
BGIOSGA029686	2486	2895	2555	3603	6198	4744	54.3349	62.0187	56.877	83.2643	121.169	105.505	9.10642e-05	1.09056	up	[C]	Energy production and conversion	Molecular Function: oxidoreductase activity, acting on the aldehyde or oxo group of donors, NAD or NADP as acceptor (GO:0016620);;	K14085|3.8e-268|dosa:Os09t0440300-01|K14085 aldehyde dehydrogenase family 7 member A1 [EC:1.2.1.31 1.2.1.8 1.2.1.3] | (RefSeq) Os09g0440300, ALDH7, ALDEHYDE_DEHYDROGENASE_7; Similar to Aldehyde dehydrogenase family 7 member A1 (EC 1.2.1.3) (Antiquitin 1) (Matured fruit 60 kDa protein) (MF-60).	Glycolysis / Gluconeogenesis (ko00010);; Ascorbate and aldarate metabolism (ko00053);; Fatty acid degradation (ko00071);; Glycine, serine and threonine metabolism (ko00260);; Valine, leucine and isoleucine degradation (ko00280);; Lysine degradation (ko00310);; Arginine and proline metabolism (ko00330);; Histidine metabolism (ko00340);; Tryptophan metabolism (ko00380);; beta-Alanine metabolism (ko…	[C]	Energy production and conversion	Aldehyde dehydrogenase family	Aldehyde dehydrogenase family 7 member A1 OS=Malus domestica OX=3750 PE=1 SV=3	C	Energy production and conversion	hypothetical protein OsI_31526 [Oryza sativa Indica Group]
BGIOSGA032562	0	0	0	630	609	656	0	0	0	6.96081	5.69359	6.97166	3.76272e-83	7.34716	up	--	--	Molecular Function: cysteine-type peptidase activity (GO:0008234);;	--	--	--	--	Ulp1 protease family, C-terminal catalytic domain	--	S	Function unknown	hypothetical protein OsI_32797 [Oryza sativa Indica Group]
BGIOSGA026556	4	2	2	164	116	98	0.036253	0.016548	0.017858	1.56987	0.942636	0.897832	6.17137e-24	4.25081	up	[K]	Transcription	Molecular Function: ADP binding (GO:0043531);;	K15078|5.8e-97|tcc:18614561|K15078 structure-specific endonuclease subunit SLX1 [EC:3.6.1.-] | (RefSeq) putative disease resistance protein RGA3	--	[T]	Signal transduction mechanisms	NB-ARC domain	Putative disease resistance protein RGA3 OS=Solanum bulbocastanum OX=147425 GN=RGA3 PE=2 SV=2	S	Function unknown	hypothetical protein OsI_30109 [Oryza sativa Indica Group]
BGIOSGA010433	98	55	67	274	252	301	3.90332	2.15012	2.71124	11.5824	9.0059	12.2339	5.95207e-12	1.99169	up	--	--	--	--	--	--	--	Plant transposase (Ptta/En/Spm family)	--	S	Function unknown	hypothetical protein OsI_12254 [Oryza sativa Indica Group]
BGIOSGA029511	406	483	454	864	1202	787	4.17124	4.86178	4.74645	9.38458	11.0474	8.22914	1.46858e-06	1.28644	up	--	--	Molecular Function: RNA binding (GO:0003723);;	K03283|5.9e-08|peq:110019053|K03283 heat shock 70kDa protein 1/2/6/8 | (RefSeq) LOW QUALITY PROTEIN: stromal 70 kDa heat shock-related protein, chloroplastic-like	Spliceosome (ko03040);; Protein processing in endoplasmic reticulum (ko04141);; Endocytosis (ko04144)	[J]	Translation, ribosomal structure and biogenesis	Pumilio-family RNA binding repeat	Pumilio homolog 6, chloroplastic OS=Arabidopsis thaliana OX=3702 GN=APUM6 PE=1 SV=1	J	Translation, ribosomal structure and biogenesis	hypothetical protein OsI_31896 [Oryza sativa Indica Group]
BGIOSGA019785	21	17	11	280	167	253	0.735861	0.578314	0.378892	10.5181	5.28312	9.14235	1.25412e-27	3.57526	up	--	--	Biological Process: reproduction (GO:0000003);; Biological Process: developmental process involved in reproduction (GO:0003006);; Molecular Function: molecular_function (GO:0003674);; Molecular Function: nucleic acid binding (GO:0003676);; Molecular Function: RNA binding (GO:0003723);; Molecular Function: catalytic activity (GO:0003824);; Molecular Function: nuclease activity (GO:0004518);; Molec…	--	--	--	--	--	--	--	--	hypothetical protein OsI_19807 [Oryza sativa Indica Group]
BGIOSGA010003	28	49	80	281	220	463	1.20318	2.08824	3.5599	13.1244	8.67984	20.8012	1.66481e-09	2.39007	up	--	--	Cellular Component: cell wall (GO:0005618);; Molecular Function: oxidoreductase activity (GO:0016491);; Molecular Function: manganese ion binding (GO:0030145);; Molecular Function: nutrient reservoir activity (GO:0045735);; Cellular Component: apoplast (GO:0048046);;	--	--	--	--	Cupin	Germin-like protein 3-6 OS=Oryza sativa subsp. japonica OX=39947 GN=Os03g0694000 PE=2 SV=1	S	Function unknown	oxalate oxidase 4 [Oryza sativa Indica Group]
BGIOSGA017642	4	4	15	38	63	39	0.428498	0.43168	1.6916	4.45676	6.29997	4.4063	0.00126742	1.83243	up	--	--	--	--	--	--	--	--	--	--	--	hypothetical protein OsI_20831 [Oryza sativa Indica Group]
BGIOSGA015592	446	385	372	0	0	0	13.795	11.6691	11.7316	0	0	0	7.10566e-54	-6.27388	down	--	--	--	--	--	--	--	--	--	--	--	hypothetical protein OsI_14854 [Oryza sativa Indica Group]
Oryza_sativa_newGene_131	0	0	0	114	58	73	0	0	0	2.25279	0.941733	1.36213	3.85419e-19	4.28549	up	--	--	Biological Process: telomere maintenance (GO:0000723);; Molecular Function: DNA helicase activity (GO:0003678);; Molecular Function: ATP binding (GO:0005524);; Biological Process: DNA repair (GO:0006281);; Biological Process: DNA recombination (GO:0006310);;	K15255|1.5e-134|osa:9267360|K15255 ATP-dependent DNA helicase PIF1 [EC:3.6.4.12] | (RefSeq) ATP-dependent DNA helicase PIF1 isoform X1	--	[D]	Cell cycle control, cell division, chromosome partitioning	PIF1-like helicase	--	D	Cell cycle control, cell division, chromosome partitioning	ATP-dependent DNA helicase PIF1 isoform X1 [Oryza sativa Japonica Group]
BGIOSGA003688	115	120	135	471	304	359	21.9442	22.5169	26.19	95.3773	52.0222	69.8743	7.88303e-15	1.77267	up	--	--	Molecular Function: DNA binding (GO:0003677);; Molecular Function: DNA-directed 5'-3' RNA polymerase activity (GO:0003899);; Cellular Component: DNA-directed RNA polymerase II, core complex (GO:0005665);; Cellular Component: DNA-directed RNA polymerase III complex (GO:0005666);; Cellular Component: DNA-directed RNA polymerase I complex (GO:0005736);; Biological Process: transcription, DNA-templat…	K03009|4.0e-25|dosa:Os01t0530366-01|K03009 DNA-directed RNA polymerases I, II, and III subunit RPABC4 | (RefSeq) Os01g0530366; RNA polymerase Rbp10 domain containing protein.	RNA polymerase (ko03020)	[K]	Transcription	DNA directed RNA polymerase, 7 kDa subunit	DNA-directed RNA polymerases II, IV and V subunit 12 OS=Arabidopsis thaliana OX=3702 GN=NRPB12 PE=1 SV=1	K	Transcription	hypothetical protein GQ55_7G321800 [Panicum hallii var. hallii]
Oryza_sativa_newGene_7097	1204	2084	2428	5411	3565	3884	13.1819	21.0401	25.5504	58.2137	32.9086	39.703	3.22128e-06	1.32307	up	--	--	--	--	--	--	--	--	--	--	--	Os07g0620700, partial [Oryza sativa Japonica Group]
BGIOSGA036003	24	25	26	393	197	303	1.88159	1.93633	2.03455	32.9321	13.9789	24.4355	6.35729e-29	3.41544	up	--	--	Molecular Function: structural constituent of ribosome (GO:0003735);; Cellular Component: ribosome (GO:0005840);; Biological Process: translation (GO:0006412);; Molecular Function: rRNA binding (GO:0019843);;	--	--	--	--	--	--	--	--	hypothetical protein OsI_38734 [Oryza sativa Indica Group]
BGIOSGA024481	118	139	71	0	0	0	16.8544	19.4756	10.32	0	0	0	1.22912e-18	-4.23018	down	--	--	--	--	--	--	--	--	--	--	--	hypothetical protein OsI_25630 [Oryza sativa Indica Group]
BGIOSGA020852	4680	5443	6123	5991	15380	8891	43.6879	49.7864	58.2026	59.1162	128.391	84.4265	0.00632983	1.06656	up	[R]	General function prediction only	Molecular Function: catalytic activity (GO:0003824);; Cellular Component: mitochondrion (GO:0005739);; Cellular Component: chloroplast stroma (GO:0009570);; Biological Process: embryo development ending in seed dormancy (GO:0009793);; Molecular Function: metal ion binding (GO:0046872);;	--	--	[O]	Posttranslational modification, protein turnover, chaperones	Peptidase M16 inactive domain	Stromal processing peptidase, chloroplastic OS=Oryza sativa subsp. indica OX=39946 GN=OsI_23765 PE=1 SV=2	O	Posttranslational modification, protein turnover, chaperones	hypothetical protein OsI_23765 [Oryza sativa Indica Group]
BGIOSGA011141	2148	2204	2513	2802	8492	4236	60.4777	60.7924	72.049	83.4113	213.848	121.325	0.00173899	1.28737	up	[R]	General function prediction only	Molecular Function: GTP binding (GO:0005525);; Biological Process: intracellular protein transport (GO:0006886);; Cellular Component: chloroplast outer membrane (GO:0009707);; Molecular Function: P-P-bond-hydrolysis-driven protein transmembrane transporter activity (GO:0015450);; Cellular Component: integral component of membrane (GO:0016021);; Molecular Function: hydrolase activity (GO:0016787);…	--	--	--	--	AIG1 family	Translocase of chloroplast 34, chloroplastic OS=Arabidopsis thaliana OX=3702 GN=TOC34 PE=1 SV=2	S	Function unknown	hypothetical protein OsI_10695 [Oryza sativa Indica Group]
BGIOSGA026166	20	19	27	40	688	144	0.433478	0.400187	0.589463	0.918959	13.4417	3.18329	4.00639e-05	2.29476	up	--	--	Molecular Function: UDP-glycosyltransferase activity (GO:0008194);;	K23452|9.5e-110|aly:9329284|K23452 UDP-glucosyltransferase 85A [EC:2.4.1.-] | (RefSeq) UDP-glycosyltransferase 85A3	Zeatin biosynthesis (ko00908)	[GC]	Carbohydrate transport and metabolism;; Energy production and conversion	UDP-glucoronosyl and UDP-glucosyl transferase	UDP-glycosyltransferase 85A3 OS=Arabidopsis thaliana OX=3702 GN=UGT85A3 PE=2 SV=2	S	Function unknown	hypothetical protein OsI_26914 [Oryza sativa Indica Group]
Oryza_sativa_newGene_6636	3695	4026	2545	330	864	672	48.9084	52.2088	34.8881	4.605	10.2187	9.03686	1.05178e-07	-1.89468	down	--	--	Cellular Component: integral component of membrane (GO:0016021);;	--	--	--	--	--	--	--	--	unknown protein [Oryza sativa Japonica Group]
BGIOSGA017445	272	416	474	602	692	852	9.92828	14.895	17.6253	23.2674	22.6067	31.6806	0.000354077	1.07243	up	--	--	--	K10638|9.0e-15|psom:113321800|K10638 E3 ubiquitin-protein ligase UHRF1 [EC:2.3.2.27] | (RefSeq) uncharacterized protein LOC113321800 isoform X1	--	--	--	Development and cell death domain	DCD domain-containing protein NRP-B OS=Glycine max OX=3847 GN=NRP-B PE=2 SV=1	--	--	B2 protein [Oryza sativa Japonica Group]
BGIOSGA001241	57	40	28	76	213	85	0.831425	0.573191	0.416399	1.18864	2.82402	1.26897	0.00781132	1.42214	up	[TK]	Signal transduction mechanisms;; Transcription	Molecular Function: protein kinase activity (GO:0004672);; Molecular Function: ATP binding (GO:0005524);; Cellular Component: integral component of membrane (GO:0016021);;	K20359|5.4e-45|eus:EUTSA_v10006389mg|K20359 PRA1 family protein 1 | (RefSeq) hypothetical protein	--	--	--	Protein kinase domain	Probable inactive receptor kinase At2g26730 OS=Arabidopsis thaliana OX=3702 GN=At2g26730 PE=1 SV=1	S	Function unknown	hypothetical protein OsI_02797 [Oryza sativa Indica Group]
BGIOSGA006322	28	20	50	240	58	96	0.328107	0.231984	0.610491	3.04404	0.619264	1.1668	0.00231949	1.62324	up	--	--	Cellular Component: integral component of membrane (GO:0016021);;	--	--	--	--	Fusaric acid resistance protein-like	--	S	Function unknown	hypothetical protein OsI_07511 [Oryza sativa Indica Group]
BGIOSGA033384	367	289	333	669	916	689	13.8903	10.7071	12.8383	26.8089	31.0413	26.5861	5.25448e-08	1.39398	up	--	--	Cellular Component: extracellular region (GO:0005576);;	K20628|1.2e-24|sind:105167838|K20628 expansin | (RefSeq) expansin-B3-like	--	--	--	Expansin C-terminal domain	Expansin-like A2 OS=Oryza sativa subsp. japonica OX=39947 GN=EXLA2 PE=2 SV=1	G	Carbohydrate transport and metabolism	hypothetical protein OsI_34514 [Oryza sativa Indica Group]
BGIOSGA024050	391	442	467	524	3181	2264	9.52544	10.5449	11.5704	13.5	69.3337	56.1375	0.0079907	1.58162	up	--	--	Cellular Component: integral component of membrane (GO:0016021);;	--	--	[R]	General function prediction only	--	Vacuole membrane protein KMS1 OS=Arabidopsis thaliana OX=3702 GN=KMS1 PE=1 SV=1	S	Function unknown	hypothetical protein OsI_26550 [Oryza sativa Indica Group]
BGIOSGA013397	369	364	558	728	809	719	13.5385	13.0699	20.8219	28.2254	26.5199	26.8225	0.000194401	1.01321	up	[H]	Coenzyme transport and metabolism	Molecular Function: hydrolase activity (GO:0016787);;	K07025|2.0e-152|dosa:Os03t0701200-01|K07025 putative hydrolase of the HAD superfamily | (RefSeq) Os03g0701200; Similar to Sugar-starvation induced protein (Fragment).	--	[R]	General function prediction only	haloacid dehalogenase-like hydrolase	--	S	Function unknown	hypothetical protein OsI_13169 [Oryza sativa Indica Group]
BGIOSGA022000	47	69	145	247	228	207	5.1525	7.54691	16.429	29.1108	22.6844	23.5069	0.00179082	1.38091	up	--	--	--	--	--	--	--	--	--	S	Function unknown	unknown [Oryza sativa Japonica Group]
BGIOSGA018976	232	317	239	42	28	84	36.1509	48.5289	38.0297	6.90588	3.85752	13.2065	8.18937e-06	-1.78576	down	--	--	Cellular Component: integral component of membrane (GO:0016021);;	--	--	--	--	--	--	S	Function unknown	Os05g0103800 [Oryza sativa Japonica Group]
BGIOSGA012243	6	6	10	51	67	39	0.356185	0.35406	0.625022	3.44713	3.78634	2.50884	4.59595e-06	2.25168	up	--	--	--	--	--	--	--	--	--	--	--	hypothetical protein OsI_10772 [Oryza sativa Indica Group]
BGIOSGA014111	64	64	25	241	244	264	3.32719	3.25634	1.29874	13.3934	11.4901	14.1246	5.59292e-10	2.22385	up	[L]	Replication, recombination and repair	Molecular Function: uracil DNA N-glycosylase activity (GO:0004844);; Biological Process: base-excision repair (GO:0006284);;	K03648|1.4e-35|dosa:Os04t0673400-01|K03648 uracil-DNA glycosylase [EC:3.2.2.27] | (RefSeq) Os04g0673400; Similar to Uracil-DNA glycosylase.	Base excision repair (ko03410)	[L]	Replication, recombination and repair	Uracil DNA glycosylase superfamily	Uracil-DNA glycosylase, mitochondrial OS=Arabidopsis thaliana OX=3702 GN=UNG PE=1 SV=1	L	Replication, recombination and repair	hypothetical protein OsI_17887 [Oryza sativa Indica Group]
BGIOSGA011217	335	363	443	592	1163	1061	7.38734	7.84262	9.96364	13.8108	22.9689	23.8426	1.0334e-05	1.44233	up	[M]	Cell wall/membrane/envelope biogenesis	Molecular Function: molecular_function (GO:0003674);; Molecular Function: catalytic activity (GO:0003824);; Cellular Component: cellular_component (GO:0005575);; Cellular Component: intracellular (GO:0005622);; Cellular Component: cell (GO:0005623);; Cellular Component: cytoplasm (GO:0005737);; Biological Process: lipid metabolic process (GO:0006629);; Biological Process: membrane lipid metabolic…	K09480|6.4e-268|dosa:Os03t0214400-01|K09480 digalactosyldiacylglycerol synthase [EC:2.4.1.241] | (RefSeq) Os03g0214400; Similar to Digalactosyldiacylglycerol synthase 2.	Glycerolipid metabolism (ko00561)	--	--	Glycosyl transferases group 1	Digalactosyldiacylglycerol synthase 2, chloroplastic OS=Lotus japonicus OX=34305 GN=DGD2 PE=2 SV=1	I	Lipid transport and metabolism	hypothetical protein OsI_10520 [Oryza sativa Indica Group]
Oryza_sativa_newGene_4242	1510	1596	1766	642	401	613	9.98983	10.3418	11.5265	4.32319	2.32324	3.99809	6.21769e-11	-1.2618	down	--	--	--	--	--	--	--	--	--	--	--	hypothetical protein DAI22_07g254401 [Oryza sativa Japonica Group]
Oryza_sativa_newGene_4205	155	190	123	262	1079	514	4.90382	5.89417	3.97393	8.77953	30.6036	16.5752	6.13856e-05	1.83881	up	--	--	Cellular Component: integral component of membrane (GO:0016021);;	--	--	--	--	--	--	--	--	uncharacterized protein LOC4325276 [Oryza sativa Japonica Group]
BGIOSGA030154	32	47	35	161	139	140	0.620979	0.912846	0.693936	3.38469	2.47663	2.82698	6.31269e-11	2.00543	up	--	--	--	K10750|4.0e-255|osa:107276899|K10750 chromatin assembly factor 1 subunit A | (RefSeq) chromatin assembly factor 1 subunit FSM-like isoform X1	--	[B]	Chromatin structure and dynamics	Chromatin assembly factor 1 subunit A	Chromatin assembly factor 1 subunit FSM OS=Oryza sativa subsp. japonica OX=39947 GN=FSM PE=2 SV=1	K	Transcription	hypothetical protein OsI_30547 [Oryza sativa Indica Group]
BGIOSGA025348	252	225	210	16	11	6	14.5824	12.7876	12.3775	0.95928	0.564529	0.347873	2.69751e-24	-3.52878	down	--	--	--	--	--	--	--	--	--	--	--	hypothetical protein OsI_25289 [Oryza sativa Indica Group]
BGIOSGA008708	1448	1114	977	4995	3135	3945	24.6844	18.6104	16.9587	90.0662	47.8156	68.4364	4.42014e-21	1.93573	up	--	--	Biological Process: reproduction (GO:0000003);; Biological Process: developmental process involved in reproduction (GO:0003006);; Molecular Function: molecular_function (GO:0003674);; Molecular Function: nucleic acid binding (GO:0003676);; Molecular Function: RNA binding (GO:0003723);; Molecular Function: catalytic activity (GO:0003824);; Molecular Function: nuclease activity (GO:0004518);; Molec…	--	--	--	--	PPR repeat family	--	S	Function unknown	hypothetical protein OsI_08260 [Oryza sativa Indica Group]
BGIOSGA038018	0	0	0	174	355	260	0	0	0	8.03613	13.9005	11.5781	4.77909e-38	5.67552	up	--	--	--	--	--	--	--	--	--	--	--	hypothetical protein OsJ_14266 [Oryza sativa Japonica Group]
BGIOSGA040584	8	2	0	79	116	31	0.235347	0.060504	0	2.59168	3.22938	0.951789	1.62252e-05	2.41121	up	[R]	General function prediction only	Molecular Function: protein serine/threonine kinase activity (GO:0004674);; Molecular Function: ATP binding (GO:0005524);;	K08818|4.4e-186|dosa:Os10t0154500-00|K08818 cell division cycle 2-like [EC:2.7.11.22] | (RefSeq) Os10g0154500; Similar to cDNA, clone: J075187A19, full insert sequence.	--	[R]	General function prediction only	Protein kinase domain	Putative cyclin-dependent kinase F-2 OS=Oryza sativa subsp. japonica OX=39947 GN=CDKF-2 PE=3 SV=1	T	Signal transduction mechanisms	putative cyclin-dependent kinase F-2 [Oryza sativa Japonica Group]
BGIOSGA008350	27	13	16	142	65	143	1.17788	0.553847	0.694089	6.71159	2.57412	6.4704	7.82795e-08	2.3085	up	--	--	Molecular Function: RNA binding (GO:0003723);;	K12881|1.8e-90|osa:4349526|K12881 THO complex subunit 4 | (RefSeq) THO complex subunit 4A isoform X1	RNA transport (ko03013);; mRNA surveillance pathway (ko03015);; Spliceosome (ko03040)	[A]	RNA processing and modification	RNA recognition motif. (a.k.a. RRM, RBD, or RNP domain)	THO complex subunit 4B OS=Arabidopsis thaliana OX=3702 GN=ALY2 PE=1 SV=1	S	Function unknown	hypothetical protein OsI_07506 [Oryza sativa Indica Group]
Oryza_sativa_newGene_1584	700	696	584	6	8	0	7.14538	6.90717	6.04833	0.058739	0.064082	0	2.38204e-66	-5.77549	down	--	--	--	--	--	--	--	--	--	--	--	hypothetical protein OsJ_01803 [Oryza sativa Japonica Group]
BGIOSGA003844	43	61	42	5	7	6	1.22601	1.73642	1.24264	0.13755	0.175575	0.169349	0.000116982	-1.9666	down	--	--	Cellular Component: integral component of membrane (GO:0016021);;	--	--	--	--	--	--	--	--	hypothetical protein DAI22_01g222000 [Oryza sativa Japonica Group]
BGIOSGA021824	5	9	18	73	47	49	0.145586	0.281824	0.599075	2.54642	1.39081	1.66079	0.000208436	1.91057	up	--	--	Molecular Function: calcium ion binding (GO:0005509);; Cellular Component: integral component of membrane (GO:0016021);;	--	--	--	--	--	Wall-associated receptor kinase 2 OS=Arabidopsis thaliana OX=3702 GN=WAK2 PE=1 SV=1	--	--	hypothetical protein OsI_21839 [Oryza sativa Indica Group]
BGIOSGA034887	160	110	145	3	0	0	2.48912	1.66621	2.30052	0.033517	0	0	1.09406e-21	-4.31546	down	[T]	Signal transduction mechanisms	Molecular Function: protein kinase activity (GO:0004672);; Molecular Function: ATP binding (GO:0005524);; Cellular Component: integral component of membrane (GO:0016021);;	K20181|3.1e-90|mtr:MTR_5g026090|K20181 vacuolar protein sorting-associated protein 18 | (RefSeq) vacuolar sorting-associated-like protein	--	--	--	Protein kinase domain	Receptor kinase-like protein Xa21 OS=Oryza sativa subsp. japonica OX=39947 GN=XA21 PE=1 SV=1	S	Function unknown	hypothetical protein OsI_35281 [Oryza sativa Indica Group]
BGIOSGA011783	2935	3079	3159	8339	6976	6925	257.2	264.396	281.886	772.568	546.68	617.341	8.19438e-37	1.51763	up	--	--	--	--	--	--	--	--	--	S	Function unknown	uncharacterized protein LOC4331521 [Oryza sativa Japonica Group]
BGIOSGA031741	43	76	76	189	3123	622	2.3448	4.06981	4.22475	10.9749	153.466	34.7657	0.00437972	1.72676	up	--	--	Cellular Component: integral component of membrane (GO:0016021);;	--	--	--	--	AWPM-19-like family	Membrane protein PM19L OS=Oryza sativa subsp. japonica OX=39947 GN=PM19L PE=2 SV=1	--	--	hypothetical protein OsI_33937 [Oryza sativa Indica Group]
BGIOSGA015383	442	270	300	117	142	128	5.4	3.22155	3.72143	1.50955	1.54356	1.58895	0.00231596	-1.02006	down	[T]	Signal transduction mechanisms	Molecular Function: protein serine/threonine kinase activity (GO:0004674);; Molecular Function: ATP binding (GO:0005524);; Cellular Component: integral component of membrane (GO:0016021);;	K13418|2.8e-56|sbi:8073419|K13418 somatic embryogenesis receptor kinase 1 [EC:2.7.10.1 2.7.11.1] | (RefSeq) LRR receptor kinase BAK1	--	--	--	Protein kinase domain	G-type lectin S-receptor-like serine/threonine-protein kinase SD2-5 OS=Arabidopsis thaliana OX=3702 GN=SD25 PE=1 SV=1	T	Signal transduction mechanisms	hypothetical protein OsI_15296 [Oryza sativa Indica Group]
Oryza_sativa_newGene_3762	355	381	611	760	2128	1201	3.38381	3.70389	11.7835	8.29636	26.7164	16.4999	7.24491e-05	1.62126	up	--	--	Cellular Component: integral component of membrane (GO:0016021);;	--	--	--	--	--	--	--	--	uncharacterized protein LOC107281173 isoform X2 [Oryza sativa Japonica Group]
BGIOSGA001872	137	148	77	33	44	34	3.24393	3.43429	1.84921	0.824679	0.915729	0.805329	0.00762578	-1.20111	down	--	--	Molecular Function: DNA binding (GO:0003677);; Cellular Component: nucleus (GO:0005634);;	K09422|5.3e-248|dosa:Os01t0285300-01|K09422 transcription factor MYB, plant | (RefSeq) Os01g0285300; Myb transcription factor domain containing protein.	--	[K]	Transcription	Myb-like DNA-binding domain	Transcription factor MYB61 OS=Arabidopsis thaliana OX=3702 GN=MYB61 PE=2 SV=1	K	Transcription	hypothetical protein OsI_01446 [Oryza sativa Indica Group]
BGIOSGA036047	87	97	72	178	189	239	1.46535	1.59847	1.22551	3.16596	2.85071	4.09863	1.58432e-06	1.39762	up	--	--	Molecular Function: calmodulin binding (GO:0005516);;	--	--	--	--	Calmodulin binding protein-like	Calmodulin-binding protein 60 B OS=Arabidopsis thaliana OX=3702 GN=CBP60B PE=2 SV=1	S	Function unknown	hypothetical protein OsI_38638 [Oryza sativa Indica Group]
Oryza_sativa_newGene_4632	9	17	13	985	796	778	0.20288	0.364694	0.295798	23.8478	16.2906	18.1358	4.35149e-106	5.7675	up	--	--	Cellular Component: nucleus (GO:0005634);; Biological Process: regulation of transcription, DNA-templated (GO:0006355);; Molecular Function: zinc ion binding (GO:0008270);;	K17604|2.3e-43|sita:101774527|K17604 zinc finger SWIM domain-containing protein 3 | (RefSeq) protein FAR1-RELATED SEQUENCE 5-like	--	--	--	FAR1 DNA-binding domain	--	S	Function unknown	hypothetical protein DAI22_08g083600 [Oryza sativa Japonica Group]
BGIOSGA002796	21	19	33	9	257	255	0.361475	0.324799	0.593615	0.153126	4.11048	4.63969	0.00636431	1.67246	up	[E]	Amino acid transport and metabolism	Biological Process: glutathione catabolic process (GO:0006751);; Cellular Component: integral component of membrane (GO:0016021);; Molecular Function: glutathione hydrolase activity (GO:0036374);;	K18592|4.8e-281|osa:4324525|K18592 gamma-glutamyltranspeptidase / glutathione hydrolase / leukotriene-C4 hydrolase [EC:2.3.2.2 3.4.19.13 3.4.19.14] | (RefSeq) gamma-glutamyltranspeptidase 3	Taurine and hypotaurine metabolism (ko00430);; Cyanoamino acid metabolism (ko00460);; Glutathione metabolism (ko00480);; Arachidonic acid metabolism (ko00590)	[E]	Amino acid transport and metabolism	Gamma-glutamyltranspeptidase	Glutathione hydrolase 3 OS=Arabidopsis thaliana OX=3702 GN=GGT3 PE=2 SV=1	E	Amino acid transport and metabolism	hypothetical protein OsI_00423 [Oryza sativa Indica Group]
BGIOSGA006882	3	0	0	34	50	39	0.033507	0	0	0.574701	0.718806	0.634331	2.74667e-07	2.76715	up	--	--	Molecular Function: protein binding (GO:0005515);;	K13420|1.1e-09|gra:105776945|K13420 LRR receptor-like serine/threonine-protein kinase FLS2 [EC:2.7.11.1] | (RefSeq) LRR receptor-like serine/threonine-protein kinase EFR	MAPK signaling pathway - plant (ko04016);; Plant-pathogen interaction (ko04626)	--	--	Leucine rich repeat	--	S	Function unknown	hypothetical protein OsI_06351 [Oryza sativa Indica Group]
BGIOSGA014807	5	35	10	91	57	135	0.499483	3.68271	1.03901	10.5581	5.53517	15.0725	0.0013648	1.80384	up	--	--	Molecular Function: chitin binding (GO:0008061);;	K01183|1.6e-29|osa:4336263|K01183 chitinase [EC:3.2.1.14] | (RefSeq) chitinase 4	Amino sugar and nucleotide sugar metabolism (ko00520)	--	--	Chitin recognition protein	Chitinase 4 OS=Oryza sativa subsp. japonica OX=39947 GN=Cht4 PE=2 SV=2	--	--	hypothetical protein OsI_16468 [Oryza sativa Indica Group]
BGIOSGA032901	94	71	37	17	15	13	2.28201	1.67432	0.911668	0.43694	0.324846	0.317096	0.00640305	-1.4363	down	--	--	Molecular Function: DNA binding (GO:0003677);; Cellular Component: nucleus (GO:0005634);; Biological Process: regulation of transcription, DNA-templated (GO:0006355);;	--	--	--	--	No apical meristem (NAM) protein	--	--	--	hypothetical protein OsI_33551 [Oryza sativa Indica Group]
BGIOSGA012680	43	63	66	7	0	11	1.09445	1.55395	1.69287	0.17681	0	0.278773	0.00378933	-1.7326	down	--	--	--	--	--	--	--	GDSL-like Lipase/Acylhydrolase	GDSL esterase/lipase At2g27360 OS=Arabidopsis thaliana OX=3702 GN=At2g27360 PE=2 SV=1	--	--	hypothetical protein OsI_11689 [Oryza sativa Indica Group]
BGIOSGA036735	454	425	342	61	136	92	21.2431	19.4839	16.2859	3.00233	5.69221	4.37493	2.40617e-05	-1.56462	down	--	--	Biological Process: vacuolar transport (GO:0007034);;	K12194|3.5e-107|dosa:Os12t0121400-00|K12194 charged multivesicular body protein 4 | (RefSeq) Os12g0121400; Snf7 family protein.	Endocytosis (ko04144)	[U]	Intracellular trafficking, secretion, and vesicular transport	Snf7	Vacuolar protein sorting-associated protein 32 homolog 1 OS=Arabidopsis thaliana OX=3702 GN=VPS32.1 PE=1 SV=1	U	Intracellular trafficking, secretion, and vesicular transport	vacuolar protein sorting-associated protein 32 homolog 2 [Oryza sativa Japonica Group]
BGIOSGA031149	0	4	0	158	97	150	0	0.032555	0	1.72828	0.900311	1.58024	3.61967e-25	4.56073	up	[O]	Posttranslational modification, protein turnover, chaperones	Molecular Function: ATP binding (GO:0005524);; Biological Process: protein folding (GO:0006457);; Molecular Function: unfolded protein binding (GO:0051082);;	K04079|8.6e-153|ats:109742829|K04079 molecular chaperone HtpG | (RefSeq) LOC109742829; heat shock protein 81-1	Protein processing in endoplasmic reticulum (ko04141);; Plant-pathogen interaction (ko04626)	[O]	Posttranslational modification, protein turnover, chaperones	Hsp90 protein	Heat shock protein 81-1 OS=Oryza sativa subsp. indica OX=39946 GN=HSP81-1 PE=2 SV=1	O	Posttranslational modification, protein turnover, chaperones	hypothetical protein OsI_32167 [Oryza sativa Indica Group]
BGIOSGA008223	3	2	0	30	236	82	0.07152	0.040651	0	0.923756	6.34749	2.50418	3.28323e-08	2.96388	up	--	--	--	--	--	--	--	WRC	--	--	--	hypothetical protein OsI_07248 [Oryza sativa Indica Group]
Oryza_sativa_newGene_2951	0	0	0	204	93	295	0	0	0	0.605531	0.233319	0.843822	1.35567e-28	5.10073	up	--	--	Molecular Function: nucleic acid binding (GO:0003676);; Molecular Function: zinc ion binding (GO:0008270);;	--	--	--	--	Zinc knuckle	--	--	--	uncharacterized protein LOC107281130 [Oryza sativa Japonica Group]
BGIOSGA015220	48	29	37	261	116	157	1.08935	0.642434	0.844758	6.29909	2.35382	3.63142	1.65016e-08	2.11579	up	--	--	Cellular Component: integral component of membrane (GO:0016021);;	--	--	--	--	Protein of unknown function (DUF2499)	--	S	Function unknown	hypothetical protein OsI_15596 [Oryza sativa Indica Group]
BGIOSGA019424	751	787	789	180	97	81	13.667	14.0425	14.6295	3.44969	1.57909	1.49243	9.62874e-16	-2.25445	down	--	--	--	K11547|1.6e-10|bdi:100836748|K11547 kinetochore protein NDC80 | (RefSeq) LOW QUALITY PROTEIN: probable kinetochore protein ndc80	--	--	--	Retrotransposon gag protein	--	--	--	hypothetical protein OsI_19034 [Oryza sativa Indica Group]
BGIOSGA032552	241	190	205	12	36	15	6.44305	4.96676	5.56105	0.321856	0.859529	0.38645	1.06568e-08	-2.43039	down	--	--	Molecular Function: protein binding (GO:0005515);;	--	--	--	--	F-box-like	--	--	--	hypothetical protein OsI_32781 [Oryza sativa Indica Group]
BGIOSGA027022	707	657	467	131	77	183	6.22052	5.66498	4.18304	1.21884	0.602675	1.63889	2.36819e-08	-1.7866	down	--	--	Molecular Function: ADP binding (GO:0043531);;	K13457|3.1e-77|egu:105052143|K13457 disease resistance protein RPM1 | (RefSeq) LOW QUALITY PROTEIN: putative disease resistance RPP13-like protein 3	Plant-pathogen interaction (ko04626)	[T]	Signal transduction mechanisms	NB-ARC domain	Disease resistance protein RGA5 OS=Oryza sativa subsp. japonica OX=39947 GN=RGA5 PE=2 SV=1	S	Function unknown	hypothetical protein OsI_29135 [Oryza sativa Indica Group]
BGIOSGA000948	27	49	32	79	119	101	0.626179	1.13772	0.752948	1.97396	2.51505	2.43358	0.000578265	1.47444	up	--	--	Cellular Component: cellular_component (GO:0005575);; Cellular Component: intracellular (GO:0005622);; Cellular Component: cell (GO:0005623);; Cellular Component: nucleus (GO:0005634);; Cellular Component: cytoplasm (GO:0005737);; Cellular Component: cytosol (GO:0005829);; Biological Process: proteolysis (GO:0006508);; Biological Process: ubiquitin-dependent protein catabolic process (GO:0006511)…	--	--	--	--	--	F-box/kelch-repeat protein At1g23390 OS=Arabidopsis thaliana OX=3702 GN=At1g23390 PE=2 SV=1	S	Function unknown	hypothetical protein OsI_03429 [Oryza sativa Indica Group]
BGIOSGA000174	0	0	0	276	314	274	0	0	0	11.1665	10.7664	10.6815	1.14857e-51	6.22321	up	[I]	Lipid transport and metabolism	--	K20802|2.2e-42|eus:EUTSA_v10014451mg|K20802 (R)-mandelonitrile lyase [EC:4.1.2.10] | (RefSeq) hypothetical protein	Cyanoamino acid metabolism (ko00460)	--	--	Alpha/beta hydrolase family	Esterase PIR7B OS=Oryza sativa subsp. indica OX=39946 GN=PIR7B PE=3 SV=2	S	Function unknown	hypothetical protein OsI_05084 [Oryza sativa Indica Group]
BGIOSGA007567	1324	1273	1183	204	467	399	20.7671	19.5559	18.8856	3.37541	6.54651	6.36634	7.22032e-05	-1.37198	down	--	--	Cellular Component: integral component of membrane (GO:0016021);;	--	--	--	--	Leucine Rich repeats (2 copies)	--	--	--	hypothetical protein OsI_05913 [Oryza sativa Indica Group]
BGIOSGA007108	292	248	267	102	93	116	3.56885	2.97796	3.33171	1.31577	1.01653	1.44344	3.09123e-05	-1.05499	down	--	--	Molecular Function: protein binding (GO:0005515);;	K13420|1.4e-07|lja:Lj4g3v0281040.1|K13420 LRR receptor-like serine/threonine-protein kinase FLS2 [EC:2.7.11.1] | (RefSeq) Lj4g3v0281040.1; -	MAPK signaling pathway - plant (ko04016);; Plant-pathogen interaction (ko04626)	[R]	General function prediction only	Leucine rich repeat	Receptor-like protein 2 OS=Arabidopsis thaliana OX=3702 GN=RLP2 PE=2 SV=1	S	Function unknown	hypothetical protein OsI_05907 [Oryza sativa Indica Group]
BGIOSGA025607	78	122	83	0	0	0	1.49263	2.30672	1.61926	0	0	0	8.61058e-18	-4.13671	down	--	--	--	--	--	--	--	FBD	--	S	Function unknown	hypothetical protein OsI_25824 [Oryza sativa Indica Group]
BGIOSGA003597	449	457	471	140	60	82	25.4503	25.4207	27.202	8.38136	3.04399	4.69591	1.84166e-10	-1.87439	down	--	--	--	--	--	--	--	--	--	--	--	hypothetical protein OsI_02090 [Oryza sativa Indica Group]
Oryza_sativa_newGene_2543	50	78	100	218	373	184	0.966107	1.76819	2.27021	4.47087	6.48285	4.328	2.75991e-05	1.73239	up	--	--	--	--	--	--	--	--	--	--	--	hypothetical protein EE612_040734, partial [Oryza sativa]
BGIOSGA011378	140	120	126	170	2642	1766	6.10617	5.0935	5.58146	7.8319	103.08	78.3735	0.00385718	1.76057	up	--	--	Biological Process: cell redox homeostasis (GO:0045454);;	--	--	[O]	Posttranslational modification, protein turnover, chaperones	Thioredoxin	Thioredoxin-like 1-1, chloroplastic OS=Arabidopsis thaliana OX=3702 GN=At1g08570 PE=2 SV=1	O	Posttranslational modification, protein turnover, chaperones	hypothetical protein OsI_10175 [Oryza sativa Indica Group]
Oryza_sativa_newGene_2373	59	53	15	182	192	122	1.23691	1.08106	0.301295	3.9534	3.46626	2.5091	0.000229623	1.75559	up	--	--	--	--	--	--	--	--	--	--	--	Os01g0532700 [Oryza sativa Japonica Group]
BGIOSGA003470	350	306	192	52	48	27	31.1582	26.6878	17.3702	4.80804	3.76041	2.39974	4.51665e-09	-2.13649	down	--	--	Cellular Component: integral component of membrane (GO:0016021);;	K24140|3.9e-09|adu:107490289|K24140 glutaredoxin-dependent peroxiredoxin [EC:1.11.1.25] | (RefSeq) peroxiredoxin-2B	--	--	--	--	Peroxiredoxin-2E-1, chloroplastic OS=Oryza sativa subsp. japonica OX=39947 GN=PRXIIE-1 PE=2 SV=1	O	Posttranslational modification, protein turnover, chaperones	hypothetical protein OsI_01820 [Oryza sativa Indica Group]
BGIOSGA015234	70	24	12	206	150	131	3.57264	1.20381	0.604741	11.1425	6.86258	6.79465	0.000563713	1.79082	up	--	--	Cellular Component: integral component of membrane (GO:0016021);; Cellular Component: mitochondrial inner membrane protein insertion complex (GO:0042721);; Biological Process: protein import into mitochondrial inner membrane (GO:0045039);;	--	--	--	--	--	--	O	Posttranslational modification, protein turnover, chaperones	hypothetical protein OsI_15570 [Oryza sativa Indica Group]
BGIOSGA007288	1	12	12	103	32	93	0.047193	0.636747	0.698089	6.27708	1.60516	5.45033	0.00022896	2.06782	up	--	--	--	--	--	--	--	--	--	--	--	hypothetical protein OsJ_05036 [Oryza sativa Japonica Group]
BGIOSGA020778	13	16	8	42	36	41	0.380801	0.444866	0.232446	1.29945	0.940404	1.22617	0.00405133	1.4847	up	--	--	Molecular Function: transcription factor activity, sequence-specific DNA binding (GO:0003700);; Cellular Component: nucleus (GO:0005634);; Molecular Function: sequence-specific DNA binding (GO:0043565);;	K18834|7.5e-19|pxb:103955058|K18834 WRKY transcription factor 1 | (RefSeq) WRKY transcription factor 1	Plant-pathogen interaction (ko04626)	--	--	WRKY DNA -binding domain	WRKY transcription factor WRKY28 OS=Oryza sativa subsp. indica OX=39946 GN=WRKY28 PE=3 SV=2	K	Transcription	hypothetical protein OsI_23911 [Oryza sativa Indica Group]
BGIOSGA030613	18	8	0	375	266	381	0.169703	0.07322	0	3.89518	2.33766	3.80806	0.00124305	1.90863	up	--	--	Molecular Function: ADP binding (GO:0043531);;	K15078|2.4e-73|vvi:100255136|K15078 structure-specific endonuclease subunit SLX1 [EC:3.6.1.-] | (RefSeq) putative disease resistance protein RGA1	--	[T]	Signal transduction mechanisms	NB-ARC domain	Putative disease resistance protein RGA3 OS=Solanum bulbocastanum OX=147425 GN=RGA3 PE=2 SV=2	S	Function unknown	hypothetical protein OsI_31080 [Oryza sativa Indica Group]
BGIOSGA022269	160	97	180	507	2002	674	5.53093	3.26662	6.32069	18.5247	61.8948	23.683	2.75405e-08	2.4812	up	[R]	General function prediction only	Molecular Function: acid phosphatase activity (GO:0003993);;	K20728|2.2e-48|bna:106380061|K20728 vegetative storage protein 2 | (RefSeq) vegetative storage protein 2	MAPK signaling pathway - plant (ko04016)	--	--	HAD superfamily, subfamily IIIB (Acid phosphatase)	Acid phosphatase 1 OS=Solanum lycopersicum OX=4081 GN=APS1 PE=2 SV=1	S	Function unknown	acid phosphatase 1 [Oryza sativa Japonica Group]
BGIOSGA016220	0	0	0	37	116	85	0	0	0	0.429117	1.14124	0.950995	1.43387e-13	3.747	up	[R]	General function prediction only	Molecular Function: ADP binding (GO:0043531);;	K15078|2.8e-65|vvi:100255136|K15078 structure-specific endonuclease subunit SLX1 [EC:3.6.1.-] | (RefSeq) putative disease resistance protein RGA1	--	[T]	Signal transduction mechanisms	NB-ARC domain	Disease resistance protein RGA2 OS=Solanum bulbocastanum OX=147425 GN=RGA2 PE=1 SV=1	S	Function unknown	hypothetical protein OsI_15564 [Oryza sativa Indica Group]
BGIOSGA000929	19	6	27	27	303	97	0.557013	0.16023	0.820911	0.874034	8.29122	3.00076	0.0017369	1.85775	up	--	--	Cellular Component: integral component of membrane (GO:0016021);;	--	--	--	--	--	--	S	Function unknown	hypothetical protein OsI_03483 [Oryza sativa Indica Group]
Oryza_sativa_newGene_3231	89	215	216	457	767	510	1.75546	4.60297	3.77094	9.52005	14.1408	10.3682	7.96458e-06	1.74172	up	--	--	Cellular Component: integral component of membrane (GO:0016021);;	--	--	--	--	--	--	--	--	hypothetical protein [Oryza sativa Japonica Group]
Oryza_sativa_newGene_2902	11	18	16	408	442	497	0.127966	0.206099	0.182983	5.74837	5.09748	7.40183	1.0562e-61	4.68442	up	--	--	--	--	--	--	--	--	--	--	--	hypothetical protein DAI22_07g101400 [Oryza sativa Japonica Group]
BGIOSGA016235	50	104	137	23	8	24	1.23453	2.52235	3.46684	0.598069	0.173219	0.602686	0.00274692	-1.5909	down	--	--	--	--	--	--	--	--	--	S	Function unknown	hypothetical protein OsI_15599 [Oryza sativa Indica Group]
BGIOSGA035035	392	405	376	58	48	81	3.68744	3.73228	3.6024	0.57751	0.400333	0.767842	4.23864e-19	-2.23679	down	[T]	Signal transduction mechanisms	Molecular Function: protein kinase activity (GO:0004672);; Molecular Function: ATP binding (GO:0005524);;	K17302|2.6e-171|ats:109733452|K17302 coatomer subunit beta' | (RefSeq) LOC109733452; CBL-interacting serine/threonine-protein kinase 7-like	--	--	--	Protein kinase domain	Cysteine-rich receptor-like protein kinase 19 OS=Arabidopsis thaliana OX=3702 GN=CRK19 PE=1 SV=2	T	Signal transduction mechanisms	hypothetical protein OsI_35593 [Oryza sativa Indica Group]
BGIOSGA037850	621	660	764	2702	2821	2506	12.6948	13.2169	15.9041	58.4144	51.5852	52.1327	1.05265e-38	2.17899	up	--	--	Molecular Function: transcription factor activity, sequence-specific DNA binding (GO:0003700);; Cellular Component: nucleus (GO:0005634);; Molecular Function: zinc ion binding (GO:0008270);; Molecular Function: sequence-specific DNA binding (GO:0043565);;	K17604|1.0e-29|dosa:Os01t0852650-00|K17604 zinc finger SWIM domain-containing protein 3 | (RefSeq) Os01g0852650; FAR1 DNA binding domain domain containing protein.	--	--	--	FAR1 DNA-binding domain	--	--	--	hypothetical protein OsI_39227 [Oryza sativa Indica Group]
BGIOSGA014422	170	216	213	669	534	590	5.15997	6.45924	6.60587	21.5609	14.568	18.3199	6.23831e-22	1.77921	up	[H]	Coenzyme transport and metabolism	Molecular Function: alternative oxidase activity (GO:0009916);; Cellular Component: integral component of membrane (GO:0016021);; Molecular Function: metal ion binding (GO:0046872);; Cellular Component: respiratory chain (GO:0070469);; Molecular Function: ubiquinol:oxygen oxidoreductase activity (GO:0102721);;	K17893|1.3e-188|dosa:Os04t0600200-01|K17893 ubiquinol oxidase [EC:1.10.3.11] | (RefSeq) Os04g0600200, AOX1A, ALTERNATIVE_OXIDASE_1A; Homodimeric diiron-carboxylate protein, Cyanide-resistant respiration in mitochondria, Reactive oxygen species (ROS) scavenging	--	--	--	Alternative oxidase	Ubiquinol oxidase 1a, mitochondrial OS=Oryza sativa subsp. japonica OX=39947 GN=AOX1A PE=2 SV=1	S	Function unknown	ubiquinol oxidase 1a, mitochondrial [Oryza sativa Japonica Group]
BGIOSGA001057	1690	1726	2057	2373	5894	3406	32.77	32.8064	40.6347	48.6623	102.248	67.2032	0.000846412	1.24137	up	--	--	--	K19041|3.2e-231|ats:109767749|K19041 E3 ubiquitin-protein ligase RNF38/44 [EC:2.3.2.27] | (RefSeq) LOC109767749; probable E3 ubiquitin-protein ligase HIP1 isoform X1	--	[O]	Posttranslational modification, protein turnover, chaperones	Ring finger domain	Probable E3 ubiquitin-protein ligase ZFP1 OS=Oryza sativa subsp. japonica OX=39947 GN=ZFP1 PE=1 SV=1	O	Posttranslational modification, protein turnover, chaperones	hypothetical protein OsI_03196 [Oryza sativa Indica Group]
BGIOSGA035611	14	45	41	269	150	206	0.400502	1.29186	1.23453	8.49813	3.99368	6.25961	3.21522e-09	2.38861	up	[L]	Replication, recombination and repair	Molecular Function: recombinase activity (GO:0000150);; Biological Process: DNA recombinase assembly (GO:0000730);; Cellular Component: condensed nuclear chromosome (GO:0000794);; Molecular Function: double-stranded DNA binding (GO:0003690);; Molecular Function: single-stranded DNA binding (GO:0003697);; Molecular Function: ATP binding (GO:0005524);; Biological Process: mitotic recombination (GO:…	K04482|6.4e-180|dosa:Os11t0615800-00|K04482 DNA repair protein RAD51 | (RefSeq) Os11g0615800, RAD51A1, DNA_REPAIR_PROTEIN_RAD51A; DNA repair and recombination, RecA-like domain containing protein.	Homologous recombination (ko03440)	[L]	Replication, recombination and repair	Rad51	DNA repair protein RAD51 homolog A OS=Zea mays OX=4577 GN=RAD51A PE=2 SV=2	L	Replication, recombination and repair	hypothetical protein OsI_36814 [Oryza sativa Indica Group]
BGIOSGA009119	261	262	332	381	677	532	7.66012	7.51783	9.91941	11.8093	17.7847	15.8739	0.00136694	1.07933	up	--	--	--	K01191|6.3e-42|pxb:103958275|K01191 alpha-mannosidase [EC:3.2.1.24] | (RefSeq) alpha-mannosidase At3g26720-like	Other glycan degradation (ko00511)	--	--	Protein of unknown function (DUF1644)	--	S	Function unknown	uncharacterized protein LOC4330865 [Oryza sativa Japonica Group]
Oryza_sativa_newGene_7523	275	249	185	20	31	41	6.62132	5.89781	4.52734	0.479171	0.592249	0.938157	4.20028e-11	-2.32536	down	--	--	Cellular Component: cytosol (GO:0005829);; Biological Process: endocytic recycling (GO:0032456);; Biological Process: retrograde transport, endosome to Golgi (GO:0042147);; Cellular Component: EARP complex (GO:1990745);;	K23288|2.0e-08|ats:109768009|K23288 syndetin | (RefSeq) LOC109768009; syndetin	--	--	--	--	--	S	Function unknown	hypothetical protein DAI22_12g102900 [Oryza sativa Japonica Group]
BGIOSGA006859	644	521	387	50	58	37	18.8058	14.9057	11.4971	1.52478	1.50619	1.08547	1.76592e-21	-2.84306	down	--	--	Biological Process: regulation of transcription, DNA-templated (GO:0006355);; Molecular Function: zinc ion binding (GO:0008270);; Biological Process: response to absence of light (GO:0009646);; Biological Process: chloroplast organization (GO:0009658);; Biological Process: response to cytokinin (GO:0009735);; Biological Process: response to gibberellin (GO:0009739);; Biological Process: regulatio…	K09184|1.7e-07|vvi:104879571|K09184 GATA-binding protein, other eukaryote | (RefSeq) GATA transcription factor 8	--	[K]	Transcription	GATA zinc finger	Protein CYTOKININ-RESPONSIVE GATA TRANSCRIPTION FACTOR 1 OS=Oryza sativa subsp. japonica OX=39947 GN=CGA1 PE=2 SV=1	K	Transcription	hypothetical protein OsI_06400 [Oryza sativa Indica Group]
BGIOSGA019631	2136	2326	2157	330	732	412	20.1561	21.5133	20.7288	3.28745	6.17518	3.95261	3.96437e-07	-1.67632	down	--	--	Molecular Function: RNA binding (GO:0003723);;	K18328|2.4e-07|nsy:104234532|K18328 lariat debranching enzyme [EC:3.1.-.-] | (RefSeq) lariat debranching enzyme isoform X1	--	[J]	Translation, ribosomal structure and biogenesis	Pumilio-family RNA binding repeat	--	J	Translation, ribosomal structure and biogenesis	hypothetical protein OsI_19483 [Oryza sativa Indica Group]
BGIOSGA021801	33	28	38	80	64	76	0.619653	0.519504	0.737764	1.62982	1.09926	1.49219	0.00200005	1.23213	up	--	--	Molecular Function: beta-glucuronidase activity (GO:0004566);; Biological Process: metabolic process (GO:0008152);; Cellular Component: membrane (GO:0016020);;	K07964|3.1e-311|osa:4340299|K07964 heparanase [EC:3.2.1.166] | (RefSeq) heparanase-like protein 3	Glycosaminoglycan degradation (ko00531)	--	--	Glycosyl hydrolase family 79, N-terminal domain	Heparanase-like protein 3 OS=Arabidopsis thaliana OX=3702 GN=At5g34940 PE=2 SV=2	G	Carbohydrate transport and metabolism	heparanase-like protein 3 [Oryza sativa Japonica Group]
BGIOSGA035125	33	19	12	58	987	409	0.585826	0.327311	0.219589	1.09211	15.9797	7.53163	0.00252964	1.81275	up	[E]	Amino acid transport and metabolism	Cellular Component: integral component of membrane (GO:0016021);; Molecular Function: transmembrane transporter activity (GO:0022857);;	K14638|3.6e-196|ats:109755472|K14638 solute carrier family 15 (peptide/histidine transporter), member 3/4 | (RefSeq) LOC109755472; protein NRT1/ PTR FAMILY 4.5-like	--	[E]	Amino acid transport and metabolism	POT family	Protein NRT1/ PTR FAMILY 4.5 OS=Arabidopsis thaliana OX=3702 GN=NPF4.5 PE=2 SV=1	E	Amino acid transport and metabolism	hypothetical protein OsI_35809 [Oryza sativa Indica Group]
BGIOSGA018506	169	135	123	41	56	29	1.9428	1.5159	1.43444	0.498055	0.5717	0.339177	0.00263858	-1.2677	down	--	--	Biological Process: defense response (GO:0006952);; Molecular Function: ADP binding (GO:0043531);;	K13457|4.1e-122|sbi:8076342|K13457 disease resistance protein RPM1 | (RefSeq) putative disease resistance RPP13-like protein 3	Plant-pathogen interaction (ko04626)	[T]	Signal transduction mechanisms	NB-ARC domain	Disease resistance protein RGA5 OS=Oryza sativa subsp. japonica OX=39947 GN=RGA5 PE=2 SV=1	S	Function unknown	hypothetical protein OsI_19027 [Oryza sativa Indica Group]
BGIOSGA026433	1088	1009	976	144	170	172	12.0537	10.9523	11.0125	1.67965	1.67643	1.93412	1.35055e-34	-2.30306	down	[E]	Amino acid transport and metabolism	Molecular Function: serine-type peptidase activity (GO:0008236);;	K01303|1.6e-07|smo:SELMODRAFT_168303|K01303 acylaminoacyl-peptidase [EC:3.4.19.1] | (RefSeq) hypothetical protein	--	[O]	Posttranslational modification, protein turnover, chaperones	Prolyl oligopeptidase family	Probable glutamyl endopeptidase, chloroplastic OS=Oryza sativa subsp. japonica OX=39947 GN=GEP PE=2 SV=1	E	Amino acid transport and metabolism	hypothetical protein OsI_27416 [Oryza sativa Indica Group]
BGIOSGA006401	885	819	809	0	0	0	24.4921	22.2168	22.8132	0	0	0	1.77779e-81	-7.27222	down	--	--	--	K14565|3.6e-173|osa:4329457|K14565 nucleolar protein 58 | (RefSeq) uncharacterized protein LOC4329457	Ribosome biogenesis in eukaryotes (ko03008)	--	--	--	--	S	Function unknown	hypothetical protein OsI_07370 [Oryza sativa Indica Group]
Oryza_sativa_newGene_3039	0	0	0	29	151	36	0	0	0	0.935888	4.17886	1.10468	5.64741e-08	2.94011	up	--	--	--	--	--	--	--	--	--	--	--	uncharacterized protein LOC107280693 [Oryza sativa Japonica Group]
BGIOSGA024415	699	669	512	111	88	107	31.9716	29.9853	23.8326	5.34206	3.58575	4.95094	2.70274e-25	-2.24589	down	--	--	--	--	--	--	--	--	--	--	--	hypothetical protein OsI_25758 [Oryza sativa Indica Group]
BGIOSGA012263	154	132	131	404	631	367	1.68058	1.40855	1.45758	4.6751	6.17466	4.08244	3.00401e-09	1.84781	up	--	--	Cellular Component: integral component of membrane (GO:0016021);; Molecular Function: myosin binding (GO:0017022);;	K11844|1.3e-14|cmo:103483482|K11844 ubiquitin carboxyl-terminal hydrolase 16/45 [EC:3.4.19.12] | (RefSeq) ubiquitin carboxyl-terminal hydrolase 2	--	--	--	Zein-binding	Myosin-binding protein 2 OS=Arabidopsis thaliana OX=3702 GN=MYOB2 PE=1 SV=1	S	Function unknown	hypothetical protein OsI_10824 [Oryza sativa Indica Group]
BGIOSGA010559	301	458	540	792	847	805	10.5668	15.7781	19.3334	29.4446	26.627	28.8031	6.14909e-05	1.1085	up	--	--	Molecular Function: molecular_function (GO:0003674);; Molecular Function: transcription cofactor activity (GO:0003712);; Molecular Function: transcription corepressor activity (GO:0003714);; Cellular Component: cellular_component (GO:0005575);; Cellular Component: intracellular (GO:0005622);; Cellular Component: cell (GO:0005623);; Cellular Component: nucleus (GO:0005634);; Biological Process: re…	K13464|3.1e-95|dosa:Os03t0402800-01|K13464 jasmonate ZIM domain-containing protein | (RefSeq) Os03g0402800, JASMONATE_ZIM-DOMAIN_PROTEIN_5, JAZ5; Tify domain containing protein.	Plant hormone signal transduction (ko04075)	--	--	tify domain	Protein TIFY 10a OS=Oryza sativa subsp. japonica OX=39947 GN=TIFY10A PE=1 SV=1	S	Function unknown	hypothetical protein OsI_11965 [Oryza sativa Indica Group]
BGIOSGA022739	459	288	268	134	123	124	5.71842	3.51944	3.39937	1.7638	1.3708	1.56279	0.0012256	-1.05531	down	--	--	Cellular Component: integral component of membrane (GO:0016021);;	K11267|3.0e-26|zma:100284656|K11267 sister chromatid cohesion protein PDS5 | (RefSeq) embryogenesis transmembrane protein	--	--	--	Domain of unknown function	--	S	Function unknown	hypothetical protein OsI_22624 [Oryza sativa Indica Group]
BGIOSGA031338	11862	9161	5006	3106	3265	2942	528.912	400.223	227.251	146.39	130.153	133.402	0.000535598	-1.1118	down	--	--	--	--	--	--	--	Tetratricopeptide repeat	--	S	Function unknown	uncharacterized protein LOC4349493 [Oryza sativa Japonica Group]
Oryza_sativa_newGene_6931	333	348	247	0	0	0	6.19918	5.59396	4.72571	0	0	0	5.77833e-44	-5.84983	down	--	--	--	--	--	--	--	--	--	--	--	hypothetical protein LOC_Os11g02964 [Oryza sativa Japonica Group]
BGIOSGA003013	37	46	55	164	80	107	1.38916	1.68013	2.11676	6.53692	2.70252	4.11633	0.00056219	1.37707	up	--	--	Molecular Function: protein dimerization activity (GO:0046983);;	K22484|1.4e-25|pvu:PHAVU_001G121200g|K22484 transcriptional regulator CBF1 | (RefSeq) hypothetical protein	--	--	--	Helix-loop-helix DNA-binding domain	Transcription factor bHLH30 OS=Arabidopsis thaliana OX=3702 GN=BHLH30 PE=1 SV=1	K	Transcription	transcription factor bHLH30 [Oryza sativa Japonica Group]
Oryza_sativa_newGene_1239	0	0	0	55	54	41	0	0	0	1.92606	1.59367	1.35913	3.19379e-13	3.66651	up	--	--	--	K00943|1.4e-31|qsu:112021668|K00943 dTMP kinase [EC:2.7.4.9] | (RefSeq) glutathione S-transferase T3-like	Pyrimidine metabolism (ko00240)	--	--	No apical meristem-associated C-terminal domain	--	--	--	glutathione S-transferase T3-like [Oryza sativa Japonica Group]
BGIOSGA006533	23094	19351	24773	62714	280889	143775	479.132	393.402	523.351	1375.51	5211.53	3034.41	2.04316e-05	2.2036	up	--	--	Molecular Function: nutrient reservoir activity (GO:0045735);;	--	--	--	--	Cupin	Glutelin type-A 1 OS=Oryza sativa subsp. japonica OX=39947 GN=GLUA1 PE=1 SV=2	--	--	hypothetical protein OsI_07091 [Oryza sativa Indica Group]
BGIOSGA029390	496	352	303	99	124	156	17.4906	12.162	10.8815	3.6766	3.90595	5.56649	0.000292244	-1.21106	down	--	--	--	K11498|6.9e-18|csat:104715885|K11498 centromeric protein E | (RefSeq) kinesin-like protein KIN-7M, chloroplastic	--	--	--	--	--	S	Function unknown	hypothetical protein OsJ_30105 [Oryza sativa Japonica Group]
Oryza_sativa_newGene_5680	168	228	179	49	33	72	9.10786	12.1244	9.87441	2.81096	1.5782	3.94932	7.24491e-05	-1.45509	down	--	--	Biological Process: mitotic sister chromatid segregation (GO:0000070);; Biological Process: sister chromatid cohesion (GO:0007062);; Molecular Function: acetyltransferase activity (GO:0016407);; Biological Process: meiotic chromosome segregation (GO:0045132);;	K11268|4.0e-19|dosa:Os04t0498900-01|K11268 N-acetyltransferase [EC:2.3.1.-] | (RefSeq) Os04g0498900; Similar to N-acetyltransferase ESCO1.	--	--	--	ESCO1/2 acetyl-transferase	--	L	Replication, recombination and repair	Os04g0498900, partial [Oryza sativa Japonica Group]
Oryza_sativa_newGene_5230	0	0	0	593	450	547	0	0	0	13.3889	8.59953	11.8995	5.52272e-76	7.11158	up	--	--	Molecular Function: ADP binding (GO:0043531);;	K15078|1.1e-49|spen:107032673|K15078 structure-specific endonuclease subunit SLX1 [EC:3.6.1.-] | (RefSeq) putative disease resistance protein RGA3	--	[T]	Signal transduction mechanisms	NB-ARC domain	Disease resistance protein RGA2 OS=Solanum bulbocastanum OX=147425 GN=RGA2 PE=1 SV=1	T	Signal transduction mechanisms	hypothetical protein DAI22_09g074500 [Oryza sativa Japonica Group]
BGIOSGA001233	1208	2036	2079	3434	2367	3619	8.42092	13.9096	14.76	25.3122	14.7567	25.6692	0.00019422	1.01359	up	[V]	Defense mechanisms	Molecular Function: ATP binding (GO:0005524);; Cellular Component: integral component of membrane (GO:0016021);; Molecular Function: ATPase activity (GO:0016887);;	K08712|1.6e-139|gsl:Gasu_29800|K08712 ATP-binding cassette, subfamily G (WHITE), member 2, SNQ2 | (RefSeq) ABC transporter, ATP-binding protein	ABC transporters (ko02010)	[Q]	Secondary metabolites biosynthesis, transport and catabolism	ABC-2 type transporter	ABC transporter G family member 36 OS=Oryza sativa subsp. indica OX=39946 GN=ABCG36 PE=2 SV=1	V	Defense mechanisms	RecName: Full=ABC transporter G family member 36; Short=OsABCG36; AltName: Full=Pleiotropic drug resistance protein 9; Short=OsPDR9 [Oryza sativa Indica Group]
Oryza_sativa_newGene_5347	108	53	80	5	7	7	3.37494	1.60733	2.54126	0.164594	0.187237	0.202137	1.31064e-07	-2.48947	down	--	--	Cellular Component: nucleus (GO:0005634);; Biological Process: regulation of transcription, DNA-templated (GO:0006355);; Molecular Function: zinc ion binding (GO:0008270);;	K17604|3.3e-13|jcu:105637617|K17604 zinc finger SWIM domain-containing protein 3 | (RefSeq) protein FAR1-RELATED SEQUENCE 6	--	--	--	FAR1 DNA-binding domain	--	S	Function unknown	hypothetical protein DAI22_04g088600 [Oryza sativa Japonica Group]
BGIOSGA008302	98	143	163	227	1005	487	2.68049	3.86407	4.57178	6.62704	24.8084	13.6831	6.03337e-05	1.88526	up	--	--	Biological Process: lipid metabolic process (GO:0006629);; Molecular Function: phosphoric diester hydrolase activity (GO:0008081);;	K18696|1.7e-191|osa:4329468|K18696 glycerophosphodiester phosphodiesterase [EC:3.1.4.46] | (RefSeq) glycerophosphodiester phosphodiesterase GDPD1, chloroplastic isoform X1	Glycerophospholipid metabolism (ko00564)	[R]	General function prediction only	Glycerophosphoryl diester phosphodiesterase family	Glycerophosphodiester phosphodiesterase GDPD2 OS=Arabidopsis thaliana OX=3702 GN=GDPD2 PE=2 SV=1	C	Energy production and conversion	hypothetical protein OsI_07393 [Oryza sativa Indica Group]
BGIOSGA003344	62	82	100	193	330	239	5.98917	7.81345	9.88609	19.9349	28.8143	23.7118	2.12938e-06	1.70065	up	--	--	--	--	--	--	--	cAMP-regulated phosphoprotein/endosulfine conserved region	--	S	Function unknown	hypothetical protein OsI_01568 [Oryza sativa Indica Group]
BGIOSGA006323	106	114	168	367	228	247	3.23572	3.401	5.21593	11.878	6.2346	7.66589	8.77721e-05	1.25204	up	[I]	Lipid transport and metabolism	--	K01054|1.0e-142|obr:102715366|K01054 acylglycerol lipase [EC:3.1.1.23] | (RefSeq) caffeoylshikimate esterase-like	Glycerolipid metabolism (ko00561)	[I]	Lipid transport and metabolism	Serine aminopeptidase, S33	--	I	Lipid transport and metabolism	hypothetical protein OsI_07510 [Oryza sativa Indica Group]
BGIOSGA034868	17	8	9	46	82	81	0.348565	0.164914	0.178334	1.03319	1.5589	1.74996	7.16278e-06	2.16301	up	--	--	--	K15078|1.5e-17|tcc:18614561|K15078 structure-specific endonuclease subunit SLX1 [EC:3.6.1.-] | (RefSeq) putative disease resistance protein RGA3	--	--	--	NB-ARC domain	--	S	Function unknown	hypothetical protein OsI_35232 [Oryza sativa Indica Group]
BGIOSGA018195	162	78	50	4	8	2	2.14938	1.00286	0.670694	0.056075	0.088577	0.025542	7.65772e-07	-2.57176	down	--	--	Molecular Function: ADP binding (GO:0043531);;	K15078|6.7e-52|nsy:104241934|K15078 structure-specific endonuclease subunit SLX1 [EC:3.6.1.-] | (RefSeq) putative disease resistance protein RGA3	--	[T]	Signal transduction mechanisms	NB-ARC domain	Putative disease resistance protein At3g14460 OS=Arabidopsis thaliana OX=3702 GN=At3g14460 PE=3 SV=1	S	Function unknown	putative disease resistance protein, contains NBS-LRR domain [Oryza sativa Japonica Group]
BGIOSGA002391	23	29	27	118	103	137	0.234137	0.289435	0.279553	1.27391	0.941996	1.42756	3.99198e-11	2.17168	up	[R]	General function prediction only	Biological Process: defense response (GO:0006952);; Molecular Function: ADP binding (GO:0043531);;	K15078|5.6e-75|tcc:18614561|K15078 structure-specific endonuclease subunit SLX1 [EC:3.6.1.-] | (RefSeq) putative disease resistance protein RGA3	--	[T]	Signal transduction mechanisms	NB-ARC domain	Putative disease resistance protein RGA4 OS=Solanum bulbocastanum OX=147425 GN=RGA4 PE=2 SV=1	S	Function unknown	NBS-LRR disease resistance protein [Oryza sativa Indica Group]
BGIOSGA015218	3875	3373	3463	86	101	117	186.659	159.244	169.853	4.34231	4.32492	5.71567	1.45488e-149	-4.69989	down	--	--	Biological Process: fatty acid biosynthetic process (GO:0006633);; Cellular Component: chloroplast (GO:0009507);; Molecular Function: acyl-[acyl-carrier-protein] desaturase activity (GO:0045300);; Molecular Function: metal ion binding (GO:0046872);;	K03921|1.9e-118|dosa:Os04t0379900-01|K03921 acyl-[acyl-carrier-protein] desaturase [EC:1.14.19.2 1.14.19.11 1.14.19.26] | (RefSeq) Os04g0379900; Similar to Acyl-[acyl-carrier-protein] desaturase, chloroplast precursor (EC 1.14.19.2) (Stearoyl-ACP desaturase).	Fatty acid biosynthesis (ko00061);; Biosynthesis of unsaturated fatty acids (ko01040);; Fatty acid metabolism (ko01212)	--	--	Fatty acid desaturase	Stearoyl-[acyl-carrier-protein] 9-desaturase 5, chloroplastic OS=Oryza sativa subsp. indica OX=39946 GN=OsI_15603 PE=3 SV=1	--	--	RecName: Full=Stearoyl-[acyl-carrier-protein] 9-desaturase 5, chloroplastic; Short=Stearoyl-ACP desaturase 5; AltName: Full=Acyl-[acyl-carrier-protein] desaturase 5; Flags: Precursor [Oryza sativa Indica Group]
BGIOSGA034858	39	38	19	117	89	91	0.793205	0.769275	0.393041	2.55141	1.63545	1.89528	7.8322e-05	1.6075	up	--	--	--	K15078|1.4e-18|tcc:18614561|K15078 structure-specific endonuclease subunit SLX1 [EC:3.6.1.-] | (RefSeq) putative disease resistance protein RGA3	--	--	--	NB-ARC domain	--	S	Function unknown	hypothetical protein OsI_35216 [Oryza sativa Indica Group]
Oryza_sativa_newGene_1221	2323	1987	1707	384	251	529	28.9983	23.8691	22.5857	5.65416	2.9234	6.79132	1.31927e-14	-1.98097	down	--	--	Molecular Function: molecular_function (GO:0003674);; Molecular Function: catalytic activity (GO:0003824);; Cellular Component: cellular_component (GO:0005575);; Cellular Component: intracellular (GO:0005622);; Cellular Component: cell (GO:0005623);; Cellular Component: cytoplasm (GO:0005737);; Cellular Component: cytosol (GO:0005829);; Cellular Component: cell-cell junction (GO:0005911);; Biolog…	--	--	--	--	--	--	G	Carbohydrate transport and metabolism	expressed protein [Oryza sativa Japonica Group]
BGIOSGA026520	105	117	193	294	221	247	4.18693	4.5538	7.83025	12.4048	7.89682	10.048	0.00292738	1.03075	up	--	--	Cellular Component: integral component of membrane (GO:0016021);;	K19041|6.3e-23|adu:107496553|K19041 E3 ubiquitin-protein ligase RNF38/44 [EC:2.3.2.27] | (RefSeq) NEP1-interacting protein 2 isoform X1	--	[O]	Posttranslational modification, protein turnover, chaperones	Ring finger domain	NEP1-interacting protein-like 1 OS=Arabidopsis thaliana OX=3702 GN=ATL27 PE=2 SV=1	O	Posttranslational modification, protein turnover, chaperones	hypothetical protein OsI_30171 [Oryza sativa Indica Group]
BGIOSGA003480	25	18	11	102	98	118	0.725603	0.5107	0.320714	3.17105	2.57702	3.52055	9.96544e-10	2.36938	up	[Q]	Secondary metabolites biosynthesis, transport and catabolism	Molecular Function: oxidoreductase activity (GO:0016491);; Molecular Function: metal ion binding (GO:0046872);;	K05658|1.8e-73|cpep:111781709|K05658 ATP-binding cassette, subfamily B (MDR/TAP), member 1 [EC:7.6.2.2] | (RefSeq) uncharacterized protein LOC111781709	ABC transporters (ko02010)	[QR]	Secondary metabolites biosynthesis, transport and catabolism;; General function prediction only	non-haem dioxygenase in morphine synthesis N-terminal	Protein SRG1 OS=Arabidopsis thaliana OX=3702 GN=SRG1 PE=2 SV=1	S	Function unknown	hypothetical protein OsI_01835 [Oryza sativa Indica Group]
Oryza_sativa_newGene_4217	0	0	0	231	162	168	0	0	0	3.19144	2.2616	2.42633	1.86165e-39	5.63083	up	--	--	Molecular Function: protein dimerization activity (GO:0046983);;	--	--	--	--	hAT family C-terminal dimerisation region	--	S	Function unknown	zinc finger MYM-type protein 1 [Oryza sativa Japonica Group]
BGIOSGA010992	20	21	19	337	226	288	1.12587	1.18563	1.12676	20.7681	11.7603	17.06	1.48812e-40	3.7206	up	[J]	Translation, ribosomal structure and biogenesis	Molecular Function: RNA binding (GO:0003723);;	K13195|7.1e-18|dct:110092694|K13195 cold-inducible RNA-binding protein | (RefSeq) organelle RRM domain-containing protein 6, chloroplastic isoform X1	--	[R]	General function prediction only	RNA recognition motif. (a.k.a. RRM, RBD, or RNP domain)	Organelle RRM domain-containing protein 2, mitochondrial OS=Arabidopsis thaliana OX=3702 GN=ORRM2 PE=1 SV=1	S	Function unknown	hypothetical protein OsI_11005 [Oryza sativa Indica Group]
BGIOSGA037951	109	94	91	0	0	0	13.5879	11.5336	11.5815	0	0	0	8.19139e-20	-4.30476	down	--	--	Molecular Function: DNA binding (GO:0003677);;	K11649|5.0e-27|osa:4334928|K11649 SWI/SNF related-matrix-associated actin-dependent regulator of chromatin subfamily C | (RefSeq) SWI/SNF complex subunit SWI3D isoform X1	--	[B]	Chromatin structure and dynamics	Myb-like DNA-binding domain	SWI/SNF complex subunit SWI3D OS=Arabidopsis thaliana OX=3702 GN=SWI3D PE=1 SV=3	--	--	SWI/SNF complex subunit SWI3D isoform X1 [Oryza sativa Japonica Group]
BGIOSGA016535	723	791	755	899	2395	1616	11.6301	12.4562	12.3643	15.2852	34.4511	26.4277	0.00105084	1.25106	up	--	--	--	--	--	--	--	--	--	S	Function unknown	uncharacterized protein LOC4336036 [Oryza sativa Japonica Group]
BGIOSGA019083	1178	830	783	0	0	0	21.0328	14.5208	14.2342	0	0	0	5.52272e-76	-7.20128	down	--	--	--	--	--	--	--	--	--	S	Function unknown	hypothetical protein OsI_18253 [Oryza sativa Indica Group]
BGIOSGA006784	1578	1232	1998	10313	175442	65766	33.0731	25.2913	42.6302	228.53	3288.65	1402.31	5.80073e-07	2.73972	up	--	--	Molecular Function: nutrient reservoir activity (GO:0045735);;	--	--	--	--	Cupin	Glutelin type-D 1 OS=Oryza sativa subsp. japonica OX=39947 GN=GLUD1 PE=2 SV=1	S	Function unknown	hypothetical protein OsI_06564 [Oryza sativa Indica Group]
BGIOSGA023592	50	75	78	157	174	94	2.04393	3.0343	3.25605	6.87291	6.44073	3.96105	0.00659507	1.15743	up	--	--	Molecular Function: hydrolase activity (GO:0016787);;	--	--	--	--	NUDIX domain	--	S	Function unknown	hypothetical protein OsI_24435 [Oryza sativa Indica Group]
BGIOSGA011001	13555	11542	8843	69	144	15	748.943	624.875	497.507	3.98938	7.07732	0.825144	1.26585e-09	-3.21239	down	[Q]	Secondary metabolites biosynthesis, transport and catabolism	--	--	--	--	--	Glyoxalase/Bleomycin resistance protein/Dioxygenase superfamily	--	S	Function unknown	hypothetical protein OsI_10991 [Oryza sativa Indica Group]
BGIOSGA003788	153	106	130	8	7	7	19.572	13.2942	16.9922	1.08834	0.777174	0.876202	8.15453e-16	-3.15448	down	--	--	--	--	--	--	--	--	--	--	--	hypothetical protein OsI_02479 [Oryza sativa Indica Group]
BGIOSGA010734	0	0	0	293	501	376	0	0	0	13.3369	19.2815	16.4419	1.02624e-51	6.33603	up	--	--	--	--	--	--	--	--	--	--	--	hypothetical protein OsI_11564 [Oryza sativa Indica Group]
BGIOSGA038096	0	0	0	111	150	146	0	0	0	2.92606	3.33991	3.69768	6.36693e-30	5.0993	up	--	--	--	K07870|1.0e-06|bdi:100827865|K07870 mitochondrial Rho GTPase 1 [EC:3.6.5.-] | (RefSeq) mitochondrial Rho GTPase 1	--	[V]	Defense mechanisms	--	Mitochondrial Rho GTPase 2 OS=Arabidopsis thaliana OX=3702 GN=MIRO2 PE=2 SV=1	--	--	hypothetical protein DAI22_03g342600 [Oryza sativa Japonica Group]
BGIOSGA029906	144	188	94	13	35	23	3.0979	3.95434	2.04058	0.294035	0.658094	0.486991	0.000152099	-1.79026	down	[Q]	Secondary metabolites biosynthesis, transport and catabolism	Biological Process: fatty acid biosynthetic process (GO:0006633);; Cellular Component: integral component of membrane (GO:0016021);; Molecular Function: transferase activity, transferring acyl groups other than amino-acyl groups (GO:0016747);;	K15397|5.6e-267|dosa:Os09t0360500-01|K15397 3-ketoacyl-CoA synthase [EC:2.3.1.199] | (RefSeq) Os09g0360500; Thiolase-like, subgroup domain containing protein.	Fatty acid elongation (ko00062);; Plant-pathogen interaction (ko04626)	--	--	FAE1/Type III polyketide synthase-like protein	3-ketoacyl-CoA synthase 17 OS=Arabidopsis thaliana OX=3702 GN=KCS17 PE=1 SV=1	U	Intracellular trafficking, secretion, and vesicular transport	hypothetical protein EE612_047272 [Oryza sativa]
Oryza_sativa_newGene_4240	260	285	317	103	78	106	2.6548	3.174	3.30361	1.37123	0.707654	1.61338	4.64035e-07	-1.25667	down	--	--	Cellular Component: integral component of membrane (GO:0016021);;	--	--	--	--	--	--	--	--	unknown protein [Oryza sativa Japonica Group]
BGIOSGA024094	80	50	51	148	263	93	2.9411	1.8147	1.92292	5.805	8.70091	3.48232	0.00339302	1.42118	up	[S]	Function unknown	--	--	--	--	--	Protein of unknown function (DUF1223)	--	S	Function unknown	uncharacterized protein LOC4343589 [Oryza sativa Japonica Group]
BGIOSGA033648	0	0	0	640	667	789	0	0	0	7.30937	6.44853	8.66974	4.9108e-84	7.41324	up	--	--	Molecular Function: ADP binding (GO:0043531);;	K13457|1.4e-107|obr:102701387|K13457 disease resistance protein RPM1 | (RefSeq) disease resistance protein RPM1-like	Plant-pathogen interaction (ko04626)	[T]	Signal transduction mechanisms	NB-ARC domain	Putative disease resistance RPP13-like protein 3 OS=Arabidopsis thaliana OX=3702 GN=RPP13L3 PE=3 SV=1	S	Function unknown	hypothetical protein OsI_36808 [Oryza sativa Indica Group]
Oryza_sativa_newGene_555	145	164	142	388	338	370	1.90583	2.8073	2.27997	4.596	3.80853	4.99917	8.59317e-15	1.48934	up	--	--	--	K14300|2.9e-30|pda:103721930|K14300 nuclear pore complex protein Nup133 | (RefSeq) LOW QUALITY PROTEIN: nuclear pore complex protein NUP133	RNA transport (ko03013)	--	--	Transposase family tnp2	--	S	Function unknown	PREDICTED: uncharacterized protein LOC102713149 isoform X2 [Oryza brachyantha]
BGIOSGA003801	0	0	2	1492	1656	1712	0	0	0.037644	53.9719	50.6776	59.5937	1.84698e-124	8.30871	up	--	--	--	--	--	--	--	--	--	--	--	hypothetical protein OsI_02508 [Oryza sativa Indica Group]
Oryza_sativa_newGene_6870	944	836	919	824	3713	2226	4.91358	4.24601	4.8326	4.52299	17.7985	11.8504	0.00394731	1.34697	up	--	--	Molecular Function: transcription cofactor activity (GO:0003712);; Biological Process: regulation of transcription from RNA polymerase II promoter (GO:0006357);; Cellular Component: mediator complex (GO:0016592);;	--	--	[K]	Transcription	--	Mediator of RNA polymerase II transcription subunit 12 OS=Arabidopsis thaliana OX=3702 GN=MED12 PE=1 SV=1	K	Transcription	hypothetical protein DAI22_10g183600 [Oryza sativa Japonica Group]
BGIOSGA029249	158	157	162	818	481	621	3.01996	2.95202	3.16928	16.6104	8.25289	12.1325	7.15398e-24	2.15295	up	--	--	Biological Process: response to hypoxia (GO:0001666);; Molecular Function: molecular_function (GO:0003674);; Molecular Function: catalytic activity (GO:0003824);; Molecular Function: protein kinase activity (GO:0004672);; Molecular Function: protein serine/threonine kinase activity (GO:0004674);; Molecular Function: protein serine/threonine/tyrosine kinase activity (GO:0004712);; Cellular Compone…	--	--	--	--	Protein of unknown function (DUF1618)	--	S	Function unknown	hypothetical protein OsI_32432 [Oryza sativa Indica Group]
BGIOSGA034471	152	137	121	564	498	557	4.6848	4.13328	3.79673	18.4754	13.776	17.5355	8.40546e-32	2.16617	up	[V]	Defense mechanisms	Molecular Function: ATP binding (GO:0005524);; Molecular Function: ATPase activity (GO:0016887);;	K05666|4.9e-121|egu:105040749|K05666 ATP-binding cassette, subfamily C (CFTR/MRP), member 2 | (RefSeq) ABC transporter C family member 10-like isoform X1	ABC transporters (ko02010)	[Q]	Secondary metabolites biosynthesis, transport and catabolism	ABC transporter	ABC transporter C family member 10 OS=Arabidopsis thaliana OX=3702 GN=ABCC10 PE=2 SV=2	V	Defense mechanisms	hypothetical protein OsI_35172 [Oryza sativa Indica Group]
BGIOSGA016619	170	190	250	276	3016	1182	3.01525	3.2996	4.52124	5.17636	47.9361	21.3544	0.00971433	1.60936	up	[G]	Carbohydrate transport and metabolism	Molecular Function: hydrolase activity, hydrolyzing O-glycosyl compounds (GO:0004553);; Biological Process: carbohydrate metabolic process (GO:0005975);;	K01179|4.3e-136|vvi:100250178|K01179 endoglucanase [EC:3.2.1.4] | (RefSeq) uncharacterized LOC100250178	Starch and sucrose metabolism (ko00500)	--	--	Cellulase (glycosyl hydrolase family 5)	Glycosyl hydrolase 5 family protein OS=Chamaecyparis obtusa OX=13415 PE=1 SV=1	G	Carbohydrate transport and metabolism	hypothetical protein OsI_16343 [Oryza sativa Indica Group]
BGIOSGA000120	245	392	15	28	15	29	19.4045	30.5016	1.20882	2.33575	1.05537	2.27166	0.0070561	-1.64444	down	--	--	--	--	--	--	--	--	--	--	--	hypothetical protein OsI_05180 [Oryza sativa Indica Group]
BGIOSGA037650	0	0	0	686	534	487	0	0	0	19.4879	12.8356	13.3098	6.2432e-75	7.12063	up	--	--	--	--	--	--	--	--	--	S	Function unknown	hypothetical protein OsI_38830 [Oryza sativa Indica Group]
BGIOSGA034866	211	150	165	0	0	0	4.75507	3.31943	3.79052	0	0	0	5.7023e-30	-5.06884	down	--	--	Molecular Function: ADP binding (GO:0043531);;	K15078|1.7e-15|tcc:18614561|K15078 structure-specific endonuclease subunit SLX1 [EC:3.6.1.-] | (RefSeq) putative disease resistance protein RGA3	--	--	--	NB-ARC domain	--	S	Function unknown	NB-ARC domain, putative [Oryza sativa Japonica Group]
BGIOSGA007594	758	621	336	54	93	126	7.78806	6.24517	3.51202	0.586306	0.849253	1.31078	2.10418e-07	-2.01746	down	--	--	Biological Process: defense response (GO:0006952);; Molecular Function: ADP binding (GO:0043531);;	K13457|2.5e-176|dosa:Os12t0246700-01|K13457 disease resistance protein RPM1 | (RefSeq) Os12g0246700; NB-ARC domain containing protein.	Plant-pathogen interaction (ko04626)	[T]	Signal transduction mechanisms	NB-ARC domain	Disease resistance protein RPM1 OS=Arabidopsis thaliana OX=3702 GN=RPM1 PE=1 SV=1	S	Function unknown	hypothetical protein OsI_05965 [Oryza sativa Indica Group]
BGIOSGA017046	453	387	425	1137	899	1012	13.6458	11.4122	13.0355	36.2484	24.2308	31.0429	9.75248e-23	1.49261	up	[S]	Function unknown	Molecular Function: phospholipid scramblase activity (GO:0017128);;	--	--	[M]	Cell wall/membrane/envelope biogenesis	Scramblase	--	S	Function unknown	hypothetical protein OsI_17247 [Oryza sativa Indica Group]
BGIOSGA011824	392	446	431	80	147	110	7.78361	8.66447	8.71013	1.66416	2.60879	2.21417	4.41377e-06	-1.47557	down	[QV]	Secondary metabolites biosynthesis, transport and catabolism;; Defense mechanisms	Molecular Function: monooxygenase activity (GO:0004497);; Molecular Function: iron ion binding (GO:0005506);; Cellular Component: integral component of membrane (GO:0016021);; Molecular Function: oxidoreductase activity, acting on paired donors, with incorporation or reduction of molecular oxygen (GO:0016705);; Molecular Function: heme binding (GO:0020037);;	K15402|4.0e-93|pop:7486378|K15402 fatty acid omega-hydroxylase [EC:1.14.-.-] | (RefSeq) cytochrome P450 86B1	Cutin, suberine and wax biosynthesis (ko00073)	[QI]	Secondary metabolites biosynthesis, transport and catabolism;; Lipid transport and metabolism	Cytochrome P450	Noroxomaritidine synthase OS=Narcissus aff. pseudonarcissus MK-2014 OX=1540222 GN=Cyp96T1 PE=1 SV=1	Q	Secondary metabolites biosynthesis, transport and catabolism	hypothetical protein OsI_09950 [Oryza sativa Indica Group]
BGIOSGA000821	81	126	106	262	1376	501	1.99239	3.0419	2.65814	6.82139	30.3467	12.5739	6.01306e-07	2.34477	up	--	--	--	--	--	--	--	Lipase (class 3)	--	S	Function unknown	hypothetical protein OsI_03753 [Oryza sativa Indica Group]
Oryza_sativa_newGene_6224	515	346	245	84	102	105	21.082	14.2787	10.6685	3.68934	4.03766	4.59065	3.13918e-05	-1.4725	down	--	--	--	--	--	--	--	--	--	--	--	hypothetical protein [Oryza sativa Japonica Group]
BGIOSGA012281	567	506	564	853	1620	1066	13.8452	12.1157	14.0264	22.0213	35.3995	26.4915	4.98766e-05	1.28686	up	[M]	Cell wall/membrane/envelope biogenesis	--	K06119|8.4e-243|dosa:Os03t0265100-01|K06119 sulfoquinovosyltransferase [EC:2.4.1.-] | (RefSeq) Os03g0265100; Glycosyl transferase, group 1 domain containing protein.	Glycerolipid metabolism (ko00561)	[MOI]	Cell wall/membrane/envelope biogenesis;; Posttranslational modification, protein turnover, chaperones;; Lipid transport and metabolism	Glycosyl transferases group 1	Sulfoquinovosyl transferase SQD2 OS=Arabidopsis thaliana OX=3702 GN=SQD2 PE=1 SV=1	M	Cell wall/membrane/envelope biogenesis	hypothetical protein OsI_10861 [Oryza sativa Indica Group]
BGIOSGA002396	0	0	0	448	298	296	0	0	0	12.3295	6.92888	7.83347	8.70388e-56	6.41626	up	--	--	--	--	--	--	--	--	--	--	--	hypothetical protein OsI_00391 [Oryza sativa Indica Group]
Oryza_sativa_newGene_1924	56	119	223	280	349	336	0.612958	1.7894	4.38532	4.00718	3.72297	4.21325	0.00796683	1.26834	up	--	--	--	--	--	--	--	--	--	--	--	uncharacterized protein LOC4325434 [Oryza sativa Japonica Group]
BGIOSGA029411	46	50	25	31	405	246	1.12371	1.1955	0.600436	0.780586	8.83274	6.11045	0.00247891	1.75952	up	--	--	Molecular Function: chaperone binding (GO:0051087);;	--	--	[T]	Signal transduction mechanisms	BAG domain	BAG family molecular chaperone regulator 1 OS=Arabidopsis thaliana OX=3702 GN=BAG1 PE=1 SV=1	O	Posttranslational modification, protein turnover, chaperones	hypothetical protein OsI_32096 [Oryza sativa Indica Group]
Oryza_sativa_newGene_1095	145	120	97	8	3	8	1.9364	1.56846	1.31497	0.106672	0.033748	0.10564	5.02559e-14	-3.13289	down	--	--	Biological Process: defense response (GO:0006952);; Molecular Function: ADP binding (GO:0043531);;	K13457|4.1e-18|nnu:109113888|K13457 disease resistance protein RPM1 | (RefSeq) disease resistance protein RPM1-like	Plant-pathogen interaction (ko04626)	[T]	Signal transduction mechanisms	NB-ARC domain	Disease resistance protein RGA4 OS=Oryza sativa subsp. japonica OX=39947 GN=RGA4 PE=2 SV=1	T	Signal transduction mechanisms	Os11g0609700 [Oryza sativa Japonica Group]
Oryza_sativa_newGene_7458	20	27	39	199	218	230	0.25644	0.342118	0.515437	3.01441	3.74512	3.8968	6.8883e-19	2.82875	up	--	--	--	--	--	--	--	--	--	--	--	Os04g0274700 [Oryza sativa Japonica Group]
BGIOSGA035497	91	88	84	4	13	0	2.6464	2.49428	2.47497	0.11818	0.314191	0	0.000423077	-2.02808	down	--	--	Molecular Function: protein binding (GO:0005515);;	--	--	--	--	Protein of unknown function (DUF295)	--	--	--	hypothetical protein OsI_36584 [Oryza sativa Indica Group]
BGIOSGA011923	2034	1740	1586	716	544	639	21.2291	17.7891	16.8516	7.89406	5.07462	6.78151	3.31401e-13	-1.20701	down	[P]	Inorganic ion transport and metabolism	Cellular Component: integral component of membrane (GO:0016021);;	K21866|4.4e-48|mcha:111019815|K21866 ion channel POLLUX/CASTOR | (RefSeq) ion channel CASTOR-like isoform X1	--	--	--	Castor and Pollux, part of voltage-gated ion channel	Putative ion channel POLLUX-like 2 OS=Arabidopsis thaliana OX=3702 GN=At5g43745 PE=2 SV=1	P	Inorganic ion transport and metabolism	hypothetical protein OsI_10131 [Oryza sativa Indica Group]
BGIOSGA005606	387	358	452	5	0	2	11.8801	10.7717	14.133	0.153941	0	0.061307	2.62892e-50	-5.56604	down	--	--	--	--	--	--	--	--	--	--	--	hypothetical protein OsI_08970 [Oryza sativa Indica Group]
BGIOSGA010486	486	671	778	3305	2160	2584	8.36593	11.3266	13.6418	60.1874	33.2771	45.286	2.09112e-24	2.19928	up	[E]	Amino acid transport and metabolism	Molecular Function: acetyl-CoA:L-glutamate N-acetyltransferase activity (GO:0004042);; Cellular Component: cytoplasm (GO:0005737);; Biological Process: arginine biosynthetic process (GO:0006526);;	K14682|0.0e+00|osa:4333177|K14682 amino-acid N-acetyltransferase [EC:2.3.1.1] | (RefSeq) probable amino-acid acetyltransferase NAGS1, chloroplastic	Arginine biosynthesis (ko00220);; 2-Oxocarboxylic acid metabolism (ko01210);; Biosynthesis of amino acids (ko01230)	[E]	Amino acid transport and metabolism	Acetyltransferase (GNAT) family	Probable amino-acid acetyltransferase NAGS2, chloroplastic OS=Arabidopsis thaliana OX=3702 GN=NAGS2 PE=1 SV=1	E	Amino acid transport and metabolism	hypothetical protein OsI_12155 [Oryza sativa Indica Group]
BGIOSGA005514	76	84	174	148	658	442	7.55774	8.20321	17.5795	15.5317	58.6349	44.7819	0.0010794	1.66744	up	--	--	--	--	--	--	--	--	--	S	Function unknown	hypothetical protein OsI_09126 [Oryza sativa Indica Group]
BGIOSGA026420	145	152	152	38	31	57	2.12165	2.18049	2.26371	0.579397	0.394439	0.841855	6.82717e-05	-1.40674	down	--	--	--	--	--	--	--	Protein of unknown function (DUF632)	Protein ALTERED PHOSPHATE STARVATION RESPONSE 1 OS=Arabidopsis thaliana OX=3702 GN=APSR1 PE=2 SV=1	S	Function unknown	hypothetical protein OsI_27389 [Oryza sativa Indica Group]
BGIOSGA014090	10	30	19	70	61	43	0.365954	1.13427	0.750254	2.93513	2.13268	1.70044	0.00964327	1.38154	up	--	--	Cellular Component: integral component of membrane (GO:0016021);;	K04077|6.8e-09|cmos:111455859|K04077 chaperonin GroEL | (RefSeq) chaperonin CPN60-like 2, mitochondrial	RNA degradation (ko03018)	--	--	Late embryogenesis abundant protein	NDR1/HIN1-like protein 6 OS=Arabidopsis thaliana OX=3702 GN=NHL6 PE=1 SV=1	S	Function unknown	NDR1/HIN1-like protein 6 [Oryza sativa Japonica Group]
BGIOSGA028161	148	111	80	40	30	32	4.05267	2.96423	2.22336	1.13961	0.728453	0.884162	0.00275238	-1.26334	down	[M]	Cell wall/membrane/envelope biogenesis	Molecular Function: protein serine/threonine kinase activity (GO:0004674);; Molecular Function: ATP binding (GO:0005524);;	K01180|1.3e-61|cmax:111487562|K01180 endo-1,3(4)-beta-glucanase [EC:3.2.1.6] | (RefSeq) uncharacterized protein LOC111487562	--	[T]	Signal transduction mechanisms	Protein kinase domain	Cold-responsive protein kinase 1 OS=Arabidopsis thaliana OX=3702 GN=CRPK1 PE=1 SV=1	T	Signal transduction mechanisms	hypothetical protein OsI_28179 [Oryza sativa Indica Group]
BGIOSGA036441	264	268	311	85	28	45	18.3783	18.2286	22.038	6.19226	1.71905	3.15821	2.80649e-07	-1.89482	down	--	--	--	--	--	--	--	--	--	--	--	hypothetical protein OsI_37842 [Oryza sativa Indica Group]
BGIOSGA025508	153	225	174	213	688	440	15.6909	22.5822	18.1377	23.0779	63.1612	45.9332	0.00382265	1.32099	up	--	--	Cellular Component: integral component of membrane (GO:0016021);;	--	--	--	--	NADH-ubiquinone reductase complex 1 MLRQ subunit	--	S	Function unknown	uncharacterized protein LOC4342911 [Oryza sativa Japonica Group]
BGIOSGA011482	378	251	225	79	101	86	11.8777	7.72941	7.19814	2.61087	2.8428	2.72342	0.000231642	-1.26926	down	--	--	Cellular Component: integral component of membrane (GO:0016021);;	--	--	--	--	Salt stress response/antifungal	Plasmodesmata-located protein 2 OS=Arabidopsis thaliana OX=3702 GN=PDLP2 PE=1 SV=1	U	Intracellular trafficking, secretion, and vesicular transport	hypothetical protein OsI_09951 [Oryza sativa Indica Group]
BGIOSGA030063	67	102	56	122	161	154	3.41416	5.10267	2.89369	6.61742	7.35571	7.99961	0.0060529	1.09072	up	--	--	Cellular Component: integral component of membrane (GO:0016021);;	--	--	--	--	Protein of unknown function (DUF565)	Ycf20-like protein OS=Arabidopsis thaliana OX=3702 GN=At1g65420 PE=2 SV=2	S	Function unknown	putative antigen receptor [Oryza sativa Indica Group]
BGIOSGA005568	53	40	68	317	409	294	3.15462	2.35311	4.12571	20.1283	21.9989	17.9516	6.33041e-18	2.64702	up	[J]	Translation, ribosomal structure and biogenesis	Molecular Function: ribonuclease inhibitor activity (GO:0008428);; Molecular Function: oxaloacetate decarboxylase activity (GO:0008948);; Molecular Function: metal ion binding (GO:0046872);; Molecular Function: 4-hydroxy-4-methyl-2-oxoglutarate aldolase activity (GO:0047443);; Biological Process: regulation of RNA metabolic process (GO:0051252);;	K02553|6.8e-50|rcu:107262668|K02553 regulator of ribonuclease activity A | (RefSeq) uncharacterized protein LOC107262668	--	--	--	Aldolase/RraA	Putative 4-hydroxy-4-methyl-2-oxoglutarate aldolase 2 OS=Arabidopsis thaliana OX=3702 GN=At5g16450 PE=1 SV=1	H	Coenzyme transport and metabolism	hypothetical protein OsI_09036 [Oryza sativa Indica Group]
BGIOSGA035067	880	713	789	240	211	223	6.74601	5.35513	6.1585	1.94436	1.44003	1.73561	3.88557e-17	-1.51017	down	[R]	General function prediction only	Molecular Function: ADP binding (GO:0043531);;	K15078|1.3e-63|tcc:18614561|K15078 structure-specific endonuclease subunit SLX1 [EC:3.6.1.-] | (RefSeq) putative disease resistance protein RGA3	--	[T]	Signal transduction mechanisms	NB-ARC domain	Putative disease resistance protein At3g14460 OS=Arabidopsis thaliana OX=3702 GN=At3g14460 PE=3 SV=1	S	Function unknown	hypothetical protein OsI_35680 [Oryza sativa Indica Group]
Oryza_sativa_newGene_7086	552	870	942	1617	1399	1203	5.91763	8.27666	9.87717	16.5813	12.797	11.3886	0.000110427	1.03711	up	--	--	Cellular Component: integral component of membrane (GO:0016021);;	--	--	--	--	--	--	--	--	hypothetical protein LOC_Os12g12070 [Oryza sativa Japonica Group]
BGIOSGA016491	120	156	150	279	419	262	1.35811	1.73526	1.72982	3.35269	4.25145	3.0259	6.9875e-05	1.32328	up	--	--	Molecular Function: oxidoreductase activity, acting on single donors with incorporation of molecular oxygen, incorporation of two atoms of oxygen (GO:0016702);; Biological Process: oxylipin biosynthetic process (GO:0031408);; Molecular Function: metal ion binding (GO:0046872);;	K00454|0.0e+00|osa:9267158|K00454 lipoxygenase [EC:1.13.11.12] | (RefSeq) putative lipoxygenase 5	Linoleic acid metabolism (ko00591);; alpha-Linolenic acid metabolism (ko00592)	--	--	Lipoxygenase	Putative lipoxygenase 5 OS=Oryza sativa subsp. japonica OX=39947 GN=Os04g0447100 PE=3 SV=2	S	Function unknown	hypothetical protein OsI_16069 [Oryza sativa Indica Group]
Oryza_sativa_newGene_1640	0	0	0	371	285	217	0	0	0	10.3851	8.44063	5.7688	6.09596e-48	6.0983	up	--	--	--	--	--	--	--	--	--	--	--	Os03g0561415, partial [Oryza sativa Japonica Group]
BGIOSGA014535	51	54	35	91	286	94	4.18151	4.39954	2.92645	7.9675	21.3071	7.88845	0.00307965	1.55157	up	--	--	--	--	--	--	--	--	--	S	Function unknown	uncharacterized protein LOC4336686 [Oryza sativa Japonica Group]
BGIOSGA035036	0	0	0	214	162	174	0	0	0	2.34288	1.49335	1.82649	4.27555e-40	5.65105	up	--	--	Molecular Function: ADP binding (GO:0043531);;	K13457|2.5e-83|bdi:100843577|K13457 disease resistance protein RPM1 | (RefSeq) putative disease resistance RPP13-like protein 3	Plant-pathogen interaction (ko04626)	[T]	Signal transduction mechanisms	NB-ARC domain	Disease resistance protein RGA4 OS=Oryza sativa subsp. japonica OX=39947 GN=RGA4 PE=1 SV=1	S	Function unknown	hypothetical protein OsI_35598 [Oryza sativa Indica Group]
BGIOSGA028284	4	6	0	48	143	148	0.203994	0.353278	0	3.25807	8.29844	9.75507	3.33719e-10	3.1866	up	--	--	--	K17604|1.2e-16|sita:101774527|K17604 zinc finger SWIM domain-containing protein 3 | (RefSeq) protein FAR1-RELATED SEQUENCE 5-like	--	--	--	--	--	--	--	hypothetical protein OsI_28427 [Oryza sativa Indica Group]
Oryza_sativa_newGene_211	7	21	15	56	33	60	0.214799	0.625543	0.448916	1.79301	0.862419	1.82434	0.00532693	1.50188	up	--	--	Cellular Component: integral component of membrane (GO:0016021);;	--	--	--	--	--	--	--	--	hypothetical protein EE612_008597 [Oryza sativa]
BGIOSGA000592	285	257	295	932	688	817	5.85827	5.18387	6.19107	20.3084	12.6858	17.1284	4.38234e-26	1.74862	up	--	--	Molecular Function: molecular_function (GO:0003674);; Molecular Function: nucleic acid binding (GO:0003676);; Molecular Function: RNA binding (GO:0003723);; Molecular Function: catalytic activity (GO:0003824);; Molecular Function: nuclease activity (GO:0004518);; Molecular Function: endonuclease activity (GO:0004519);; Molecular Function: binding (GO:0005488);; Cellular Component: cellular_compon…	K23541|5.2e-58|dosa:Os07t0239600-01|K23541 Ca2+/H+ antiporter, TMEM165/GDT1 family | (RefSeq) Os07g0239600; Pentatricopeptide repeat domain containing protein.	--	[R]	General function prediction only	PPR repeat family	Pentatricopeptide repeat-containing protein At3g14730 OS=Arabidopsis thaliana OX=3702 GN=PCMP-E31 PE=2 SV=1	S	Function unknown	pentatricopeptide repeat-containing protein At3g14730 [Oryza sativa Japonica Group]
Oryza_sativa_newGene_6926	10	2	2	83	100	61	0.431139	0.080005	0.084459	3.76575	3.83837	2.66945	3.59769e-09	2.91269	up	--	--	Molecular Function: zinc ion binding (GO:0008270);;	K11816|5.8e-46|ats:109783187|K11816 indole-3-pyruvate monooxygenase [EC:1.14.13.168] | (RefSeq) uncharacterized protein LOC109783187	Tryptophan metabolism (ko00380)	--	--	Plant mobile domain	Serine/threonine-protein phosphatase 7 long form homolog OS=Arabidopsis thaliana OX=3702 GN=MAIL3 PE=2 SV=1	S	Function unknown	protein MAIN-LIKE 2-like [Oryza sativa Japonica Group]
BGIOSGA013604	3589	6761	9795	20347	9328	16951	70.9784	131.022	197.269	425.438	164.982	341.05	0.000704929	1.28024	up	[QV]	Secondary metabolites biosynthesis, transport and catabolism;; Defense mechanisms	Molecular Function: monooxygenase activity (GO:0004497);; Molecular Function: iron ion binding (GO:0005506);; Cellular Component: integral component of membrane (GO:0016021);; Molecular Function: oxidoreductase activity, acting on paired donors, with incorporation or reduction of molecular oxygen (GO:0016705);; Molecular Function: heme binding (GO:0020037);;	K13260|8.3e-123|qsu:112025873|K13260 isoflavone/4'-methoxyisoflavone 2'-hydroxylase [EC:1.14.14.90 1.14.14.89] | (RefSeq) cytochrome P450 81E8-like isoform X1	Isoflavonoid biosynthesis (ko00943)	[Q]	Secondary metabolites biosynthesis, transport and catabolism	Cytochrome P450	Cytochrome P450 81Q32 OS=Catharanthus roseus OX=4058 GN=CYP81Q32 PE=2 SV=1	Q	Secondary metabolites biosynthesis, transport and catabolism	putative cytochrome P450 [Oryza sativa Japonica Group]
Oryza_sativa_newGene_1619	110	67	61	18	23	14	3.38391	2.0811	1.96156	0.571187	0.610108	0.452904	0.0031425	-1.45149	down	--	--	--	--	--	--	--	--	--	--	--	uncharacterized protein LOC112938203 [Oryza sativa Japonica Group]
BGIOSGA029381	1467	2075	2609	4690	3064	3397	23.8908	33.1122	43.2687	80.7674	44.6398	56.2917	8.08823e-05	1.04717	up	[T]	Signal transduction mechanisms	Biological Process: phosphorelay signal transduction system (GO:0000160);; Cellular Component: nucleus (GO:0005634);;	K12130|0.0e+00|dosa:Os09t0532400-01|K12130 pseudo-response regulator 5 | (RefSeq) Os09g0532400, PSEUDO-RESPONSE_REGULATOR_95, PRR95; Signal transduction response regulator, receiver region domain containing protein.	Circadian rhythm - plant (ko04712)	[K]	Transcription	Response regulator receiver domain	Two-component response regulator-like PRR95 OS=Oryza sativa subsp. japonica OX=39947 GN=PRR95 PE=2 SV=1	K	Transcription	hypothetical protein OsI_32150 [Oryza sativa Indica Group]
BGIOSGA031335	134	126	175	269	356	209	4.61852	4.26942	6.15658	9.84235	11.0451	7.35632	0.00224502	1.09998	up	--	--	Biological Process: endosperm development (GO:0009960);; Biological Process: regulation of seed growth (GO:0080113);;	--	--	--	--	VQ motif	Protein HAIKU1 OS=Arabidopsis thaliana OX=3702 GN=IKU1 PE=1 SV=1	S	Function unknown	hypothetical protein OsI_34778 [Oryza sativa Indica Group]
BGIOSGA038976	109	88	101	30	34	35	6.6983	5.28909	6.36693	1.93802	1.84709	2.20159	0.00293418	-1.16438	down	--	--	Biological Process: defense response (GO:0006952);; Molecular Function: ADP binding (GO:0043531);;	K15078|1.5e-22|vvi:100255136|K15078 structure-specific endonuclease subunit SLX1 [EC:3.6.1.-] | (RefSeq) putative disease resistance protein RGA1	--	[T]	Signal transduction mechanisms	NB-ARC domain	Putative disease resistance protein RGA4 OS=Solanum bulbocastanum OX=147425 GN=RGA4 PE=2 SV=1	S	Function unknown	NBS-LRR type protein, partial [Oryza sativa Japonica Group]
BGIOSGA012485	46	48	63	118	235	134	2.68295	2.74046	3.70652	7.27034	12.253	7.95274	0.000110903	1.62189	up	--	--	Molecular Function: calcium ion binding (GO:0005509);;	K02183|1.0e-48|obr:102702735|K02183 calmodulin | (RefSeq) probable calcium-binding protein CML16	MAPK signaling pathway - plant (ko04016);; Phosphatidylinositol signaling system (ko04070);; Plant-pathogen interaction (ko04626)	[T]	Signal transduction mechanisms	EF hand	Calcium-binding protein CP1 OS=Arabidopsis thaliana OX=3702 GN=CP1 PE=2 SV=1	DTZ	Cell cycle control, cell division, chromosome partitioning;; Signal transduction mechanisms;; Cytoskeleton	hypothetical protein OsI_11276 [Oryza sativa Indica Group]
BGIOSGA017144	61	89	108	124	833	544	2.25673	3.24567	4.08741	4.86305	27.7275	20.5785	3.15228e-05	2.08568	up	--	--	Molecular Function: chaperone binding (GO:0051087);;	--	--	[T]	Signal transduction mechanisms	BAG domain	BAG family molecular chaperone regulator 1 OS=Arabidopsis thaliana OX=3702 GN=BAG1 PE=1 SV=1	O	Posttranslational modification, protein turnover, chaperones	hypothetical protein OsI_17448 [Oryza sativa Indica Group]
Oryza_sativa_newGene_4172	309	171	188	3	0	0	8.56707	4.65177	5.3149	0.05889	0	0	5.31769e-28	-4.82017	down	--	--	Molecular Function: cysteine-type peptidase activity (GO:0008234);;	--	--	--	--	--	--	O	Posttranslational modification, protein turnover, chaperones	hypothetical protein [Oryza sativa Japonica Group]
BGIOSGA035989	131	148	159	401	242	344	3.37673	3.73579	4.18283	10.977	5.59952	9.06999	7.38829e-08	1.34227	up	--	--	Cellular Component: integral component of membrane (GO:0016021);;	--	--	[S]	Function unknown	Ion channel regulatory protein UNC-93	UNC93-like protein 3 OS=Arabidopsis thaliana OX=3702 GN=At3g09470 PE=2 SV=1	S	Function unknown	hypothetical protein OsI_38765 [Oryza sativa Indica Group]
Oryza_sativa_newGene_6736	25	82	94	124	625	224	0.145117	0.472476	0.634758	0.768257	3.46277	1.46518	0.00120513	1.78282	up	--	--	--	--	--	--	--	--	--	--	--	hypothetical protein LOC_Os10g30010 [Oryza sativa Japonica Group]
BGIOSGA006005	26	38	70	60	248	164	1.01822	1.42902	2.78568	2.45101	8.68181	6.51438	0.00581791	1.52354	up	--	--	Molecular Function: DNA binding (GO:0003677);; Cellular Component: nucleus (GO:0005634);;	K09422|3.7e-140|dosa:Os02t0624300-01|K09422 transcription factor MYB, plant | (RefSeq) Os02g0624300; Similar to Y19 protein.	--	[K]	Transcription	Myb-like DNA-binding domain	Transcription factor MYB30 OS=Oryza sativa subsp. japonica OX=39947 GN=MYB30 PE=1 SV=1	K	Transcription	transcription factor MYB30-like [Oryza sativa Japonica Group]
BGIOSGA019617	367	366	263	37	46	99	17.8388	17.4257	13.0139	1.88173	1.98559	4.85776	1.69382e-06	-1.86751	down	--	--	Molecular Function: DNA binding (GO:0003677);; Cellular Component: nucleus (GO:0005634);;	--	--	--	--	Homeodomain	Homeobox-DDT domain protein RLT2 OS=Arabidopsis thaliana OX=3702 GN=RLT2 PE=1 SV=1	--	--	hypothetical protein OsI_19460 [Oryza sativa Indica Group]
BGIOSGA034332	105	119	100	9	22	23	2.43127	2.69418	2.35673	0.204782	0.456716	0.544138	3.2298e-05	-1.85306	down	--	--	Molecular Function: DNA binding (GO:0003677);;	K00423|9.8e-08|egr:104451286|K00423 L-ascorbate oxidase [EC:1.10.3.3] | (RefSeq) LOW QUALITY PROTEIN: L-ascorbate oxidase	Ascorbate and aldarate metabolism (ko00053)	--	--	--	F-box/LRR-repeat protein At3g03360 OS=Arabidopsis thaliana OX=3702 GN=At3g03360 PE=2 SV=2	S	Function unknown	hypothetical protein OsI_35480 [Oryza sativa Indica Group]
BGIOSGA001117	42	58	86	101	185	141	0.473603	0.638596	0.983624	1.20907	1.87569	1.62739	0.00666739	1.24147	up	[T]	Signal transduction mechanisms	Molecular Function: voltage-gated potassium channel activity (GO:0005249);; Cellular Component: integral component of membrane (GO:0016021);; Biological Process: regulation of ion transmembrane transport (GO:0034765);;	K21867|0.0e+00|dosa:Os01t0648000-01|K21867 potassium channel | (RefSeq) Os01g0648000; Similar to AKT1-like potassium channel.	--	[PT]	Inorganic ion transport and metabolism;; Signal transduction mechanisms	Ion transport protein	Potassium channel AKT1 OS=Oryza sativa subsp. indica OX=39946 GN=AKT1 PE=2 SV=1	U	Intracellular trafficking, secretion, and vesicular transport	hypothetical protein OsI_03064 [Oryza sativa Indica Group]
BGIOSGA012172	422	766	1008	1261	2206	1603	9.23426	16.437	22.4819	29.1952	43.2069	35.719	0.000474928	1.3204	up	--	--	Molecular Function: NAD+ ADP-ribosyltransferase activity (GO:0003950);;	--	--	--	--	RCD1-SRO-TAF4 (RST) plant domain	Probable inactive poly [ADP-ribose] polymerase SRO2 OS=Arabidopsis thaliana OX=3702 GN=SRO2 PE=1 SV=1	S	Function unknown	probable inactive poly [ADP-ribose] polymerase SRO2 [Oryza sativa Japonica Group]
BGIOSGA007354	1	0	0	72	48	85	0.018594	0	0	1.69263	0.96445	1.93655	2.50073e-16	3.96057	up	--	--	Molecular Function: protein serine/threonine kinase activity (GO:0004674);; Molecular Function: ATP binding (GO:0005524);; Cellular Component: integral component of membrane (GO:0016021);;	K13420|5.4e-09|tcc:18605271|K13420 LRR receptor-like serine/threonine-protein kinase FLS2 [EC:2.7.11.1] | (RefSeq) probable LRR receptor-like serine/threonine-protein kinase At3g47570	MAPK signaling pathway - plant (ko04016);; Plant-pathogen interaction (ko04626)	--	--	Leucine rich repeat	Probable LRR receptor-like serine/threonine-protein kinase At3g47570 OS=Arabidopsis thaliana OX=3702 GN=At3g47570 PE=2 SV=1	S	Function unknown	hypothetical protein OsI_05514 [Oryza sativa Indica Group]
BGIOSGA003477	264	217	141	33	29	17	4.28859	3.45588	2.33113	0.567118	0.417668	0.280189	1.76777e-09	-2.29542	down	[K]	Transcription	Molecular Function: NAD+ ADP-ribosyltransferase activity (GO:0003950);; Biological Process: protein ADP-ribosylation (GO:0006471);;	K10798|2.6e-240|obr:102714229|K10798 poly [ADP-ribose] polymerase 2/3/4 [EC:2.4.2.30] | (RefSeq) poly [ADP-ribose] polymerase 2-A	Base excision repair (ko03410)	[KLO]	Transcription;; Replication, recombination and repair;; Posttranslational modification, protein turnover, chaperones	Poly(ADP-ribose) polymerase catalytic domain	Poly [ADP-ribose] polymerase 2-B OS=Oryza sativa subsp. japonica OX=39947 GN=PARP2-B PE=3 SV=2	S	Function unknown	hypothetical protein OsI_01832 [Oryza sativa Indica Group]
Oryza_sativa_newGene_5194	731	711	547	0	0	0	7.84387	7.12499	6.22075	0	0	0	1.49644e-68	-6.87713	down	--	--	--	--	--	--	--	--	--	--	--	uncharacterized protein LOC4325427 isoform X2 [Oryza sativa Japonica Group]
Oryza_sativa_newGene_4433	163	163	203	13	3	8	4.19919	4.10111	5.30773	0.339955	0.04611	0.193807	1.17284e-18	-3.42833	down	--	--	--	K23222|1.2e-28|nsy:104242359|K23222 nuclease HARBI1 [EC:3.1.-.-] | (RefSeq) uncharacterized protein LOC104242359	--	[L]	Replication, recombination and repair	DDE superfamily endonuclease	--	L	Replication, recombination and repair	PREDICTED: putative nuclease HARBI1 [Oryza brachyantha]
BGIOSGA021541	238	195	225	38	72	48	4.4823	3.59464	4.31367	0.757169	1.20768	0.908554	2.76265e-05	-1.55347	down	[G]	Carbohydrate transport and metabolism	Molecular Function: cellulase activity (GO:0008810);; Biological Process: cellulose catabolic process (GO:0030245);;	K01179|2.8e-174|obr:102717560|K01179 endoglucanase [EC:3.2.1.4] | (RefSeq) endoglucanase 2-like	Starch and sucrose metabolism (ko00500)	--	--	Glycosyl hydrolase family 9	Endoglucanase 16 OS=Oryza sativa subsp. japonica OX=39947 GN=Os06g0247900 PE=2 SV=2	G	Carbohydrate transport and metabolism	endoglucanase 16 [Oryza sativa Japonica Group]
BGIOSGA010271	168	187	155	190	762	360	4.83755	5.27656	4.55255	5.77814	19.6564	10.5494	0.00612015	1.34783	up	--	--	--	--	--	--	--	Protein of unknown function (DUF620)	--	S	Function unknown	hypothetical protein OsI_12556 [Oryza sativa Indica Group]
BGIOSGA026411	104	160	190	256	332	379	5.11138	7.77185	9.5865	13.405	14.7019	19.077	0.00031984	1.23372	up	--	--	--	--	--	--	--	Ricin-type beta-trefoil lectin domain-like	Ricin B-like lectin R40G3 OS=Oryza sativa subsp. japonica OX=39947 GN=R40G3 PE=2 SV=1	S	Function unknown	ricin B-like lectin R40G3 [Oryza sativa Japonica Group]
BGIOSGA035635	164	104	106	26	18	20	8.97558	5.59322	5.90933	1.4888	0.835747	1.07266	5.80073e-07	-1.94744	down	--	--	Cellular Component: origin recognition complex (GO:0000808);; Molecular Function: DNA binding (GO:0003677);; Cellular Component: nucleus (GO:0005634);; Biological Process: DNA replication (GO:0006260);;	K02606|1.0e-30|ats:109779720|K02606 origin recognition complex subunit 4 | (RefSeq) LOC109779720; origin of replication complex subunit 4	--	--	--	--	Origin of replication complex subunit 4 OS=Oryza sativa subsp. japonica OX=39947 GN=ORC4 PE=2 SV=1	--	--	hypothetical protein OsI_36876 [Oryza sativa Indica Group]
BGIOSGA024613	88	78	113	300	2688	520	5.77194	5.00234	7.52204	20.757	157.624	34.6829	0.0022393	1.84225	up	--	--	Molecular Function: serine-type endopeptidase inhibitor activity (GO:0004867);;	--	--	--	--	Protease inhibitor/seed storage/LTP family	Alpha-amylase inhibitor 5 OS=Sorghum bicolor OX=4558 PE=1 SV=1	--	--	alpha-amylase inhibitor 5 [Oryza sativa Japonica Group]
BGIOSGA034686	1656	2008	1551	114	242	377	141.43	168.088	134.893	10.2302	18.4256	32.7285	8.57856e-10	-2.21264	down	--	--	Biological Process: lipid transport (GO:0006869);; Molecular Function: lipid binding (GO:0008289);;	--	--	--	--	Protease inhibitor/seed storage/LTP family	Probable non-specific lipid-transfer protein 3 OS=Triticum aestivum OX=4565 GN=LTP3 PE=2 SV=1	U	Intracellular trafficking, secretion, and vesicular transport	hypothetical protein OsI_34868 [Oryza sativa Indica Group]
BGIOSGA003346	19	55	66	184	289	118	0.753653	2.22114	2.77513	8.03258	10.6738	4.95781	0.000223108	1.81129	up	--	--	Biological Process: transcription, DNA-templated (GO:0006351);; Molecular Function: sequence-specific DNA binding (GO:0043565);;	--	--	--	--	Seed dormancy control	Protein RESPONSE TO ABA AND SALT 1 OS=Arabidopsis thaliana OX=3702 GN=RAS1 PE=2 SV=1	S	Function unknown	protein DOG1-like 4 [Oryza sativa Japonica Group]
BGIOSGA015208	41	67	43	0	0	0	2.2446	3.58627	2.41091	0	0	0	8.57856e-10	-3.20877	down	--	--	--	--	--	--	--	--	--	--	--	hypothetical protein OsI_15637 [Oryza sativa Indica Group]
Oryza_sativa_newGene_7542	94	70	72	0	0	0	1.88053	1.37777	1.46303	0	0	0	7.65323e-16	-3.9379	down	--	--	Molecular Function: DNA binding (GO:0003677);; Molecular Function: protein dimerization activity (GO:0046983);;	K02995|3.3e-31|adu:107464504|K02995 small subunit ribosomal protein S8e | (RefSeq) 40S ribosomal protein S8	Ribosome (ko03010)	--	--	Protein of unknown function (DUF 659)	--	S	Function unknown	uncharacterized protein LOC107276381 [Oryza sativa Japonica Group]
BGIOSGA006641	79	73	48	23	16	12	5.48663	5.00676	3.40975	1.65436	1.00067	0.827481	0.00663489	-1.35476	down	--	--	--	--	--	--	--	--	--	--	--	hypothetical protein OsI_06855 [Oryza sativa Indica Group]
Oryza_sativa_newGene_4175	134	219	247	0	0	0	2.5	2.47853	4.30678	0	0	0	1.62366e-29	-5.07776	down	--	--	--	--	--	--	--	--	--	--	--	Os06g0662550, partial [Oryza sativa Japonica Group]
BGIOSGA016358	86	239	213	594	662	436	2.34624	6.39473	5.93889	17.1831	16.2215	12.1489	1.57679e-05	1.66813	up	--	--	Molecular Function: hydrolase activity, hydrolyzing O-glycosyl compounds (GO:0004553);; Biological Process: carbohydrate metabolic process (GO:0005975);;	K19891|6.3e-72|ath:AT2G01630|K19891 glucan endo-1,3-beta-glucosidase 1/2/3 [EC:3.2.1.39] | (RefSeq) O-Glycosyl hydrolases family 17 protein	Starch and sucrose metabolism (ko00500)	--	--	Glycosyl hydrolases family 17	Glucan endo-1,3-beta-glucosidase 14 OS=Arabidopsis thaliana OX=3702 GN=At2g27500 PE=2 SV=2	G	Carbohydrate transport and metabolism	hypothetical protein OsI_15811 [Oryza sativa Indica Group]
BGIOSGA033306	521	533	547	44	68	35	8.49949	8.50719	9.08268	0.748579	0.977865	0.573465	1.42001e-22	-2.86805	down	--	--	Molecular Function: microtubule motor activity (GO:0003777);; Molecular Function: ATP binding (GO:0005524);; Cellular Component: microtubule (GO:0005874);; Biological Process: microtubule-based movement (GO:0007018);; Molecular Function: microtubule binding (GO:0008017);;	K10405|7.5e-195|osa:4342193|K10405 kinesin family member C1 | (RefSeq) kinesin-5	--	[Z]	Cytoskeleton	Kinesin motor domain	Kinesin-like protein KIN-14N OS=Oryza sativa subsp. japonica OX=39947 GN=KIN14N PE=2 SV=2	Z	Cytoskeleton	hypothetical protein OsI_34377 [Oryza sativa Indica Group]
BGIOSGA001269	0	0	0	86	125	90	0	0	0	1.72913	2.12268	1.739	8.24688e-23	4.60125	up	[QV]	Secondary metabolites biosynthesis, transport and catabolism;; Defense mechanisms	Molecular Function: monooxygenase activity (GO:0004497);; Molecular Function: iron ion binding (GO:0005506);; Cellular Component: integral component of membrane (GO:0016021);; Molecular Function: oxidoreductase activity, acting on paired donors, with incorporation or reduction of molecular oxygen (GO:0016705);; Molecular Function: heme binding (GO:0020037);;	K23809|2.8e-142|mtr:MTR_2g055430|K23809 cytochrome P450 family 72 subfamily A polypeptide 68 [EC:1.14.14.-] | (RefSeq) cytochrome P450 family 72 protein	--	[QI]	Secondary metabolites biosynthesis, transport and catabolism;; Lipid transport and metabolism	Cytochrome P450	Cytochrome P450 72A225 OS=Catharanthus roseus OX=4058 GN=CYP72A225 PE=2 SV=1	Q	Secondary metabolites biosynthesis, transport and catabolism	hypothetical protein OsI_02734 [Oryza sativa Indica Group]
BGIOSGA020318	37	75	50	78	529	200	3.81924	7.66978	5.28701	8.59197	49.5617	21.2618	0.000753372	1.83019	up	--	--	Biological Process: lipid transport (GO:0006869);;	--	--	--	--	Probable lipid transfer	Non-specific lipid-transfer protein 2 OS=Apium graveolens var. rapaceum OX=278110 PE=1 SV=1	S	Function unknown	non-specific lipid-transfer protein 2 [Oryza sativa Japonica Group]
BGIOSGA025494	129	132	136	300	214	248	3.95622	3.94942	4.22234	9.7155	5.86111	7.74466	8.3032e-07	1.14136	up	--	--	Biological Process: lipid metabolic process (GO:0006629);;	K18875|1.6e-18|han:110941662|K18875 enhanced disease susceptibility 1 protein | (RefSeq) protein EDS1-like	Plant-pathogen interaction (ko04626)	--	--	Lipase (class 3)	Lipase-like PAD4 OS=Arabidopsis thaliana OX=3702 GN=PAD4 PE=1 SV=1	--	--	hypothetical protein OsI_25594 [Oryza sativa Indica Group]
BGIOSGA007103	157	141	149	56	43	44	2.42342	2.12985	2.34328	0.915625	0.58883	0.685965	4.98766e-05	-1.27043	down	--	--	Cellular Component: integral component of membrane (GO:0016021);;	K13420|2.1e-06|sind:105179504|K13420 LRR receptor-like serine/threonine-protein kinase FLS2 [EC:2.7.11.1] | (RefSeq) probable LRR receptor-like serine/threonine-protein kinase At3g47570	MAPK signaling pathway - plant (ko04016);; Plant-pathogen interaction (ko04626)	[R]	General function prediction only	Leucine rich repeat	Receptor-like protein 3 OS=Arabidopsis thaliana OX=3702 GN=RLP3 PE=2 SV=1	S	Function unknown	hypothetical protein OsI_05914 [Oryza sativa Indica Group]
BGIOSGA002218	127	84	126	224	198	243	4.87683	3.13785	4.91069	9.10913	6.7898	9.49954	0.000107378	1.15119	up	--	--	Molecular Function: DNA binding (GO:0003677);; Cellular Component: nucleus (GO:0005634);;	K09422|2.8e-114|dosa:Os01t0191900-01|K09422 transcription factor MYB, plant | (RefSeq) Os01g0191900; Similar to Blind.	--	[K]	Transcription	Myb-like DNA-binding domain	Transcription factor RAX2 OS=Arabidopsis thaliana OX=3702 GN=RAX2 PE=1 SV=1	K	Transcription	hypothetical protein OsI_00732 [Oryza sativa Indica Group]
BGIOSGA036790	674	622	626	218	162	334	14.2997	12.9233	13.5077	4.8898	3.06277	7.20704	0.000220894	-1.09351	down	--	--	--	K09602|6.5e-21|sbi:8085840|K09602 ubiquitin thioesterase protein OTUB1 [EC:3.4.19.12] | (RefSeq) uncharacterized protein LOC8085840	--	--	--	--	--	S	Function unknown	hypothetical protein OsI_37174 [Oryza sativa Indica Group]
BGIOSGA026049	34	38	32	82	77	59	1.49287	1.62725	1.44138	3.8749	3.06275	2.65031	0.00555464	1.15755	up	--	--	Biological Process: nitrogen compound metabolic process (GO:0006807);; Biological Process: multicellular organism development (GO:0007275);; Biological Process: biological_process (GO:0008150);; Biological Process: metabolic process (GO:0008152);; Biological Process: anatomical structure morphogenesis (GO:0009653);; Biological Process: leaf morphogenesis (GO:0009965);; Biological Process: shoot s…	--	--	--	--	Lateral organ boundaries (LOB) domain	LOB domain-containing protein 37 OS=Arabidopsis thaliana OX=3702 GN=LBD37 PE=2 SV=1	S	Function unknown	hypothetical protein OsI_26687 [Oryza sativa Indica Group]
BGIOSGA024611	4632	5167	6408	20190	194524	66340	292.466	319.695	411.977	1347.73	10984.3	4261.26	4.55252e-05	2.30584	up	--	--	Molecular Function: serine-type endopeptidase inhibitor activity (GO:0004867);;	--	--	--	--	Protease inhibitor/seed storage/LTP family	Seed allergenic protein RAG2 OS=Oryza sativa subsp. japonica OX=39947 GN=RAG2 PE=1 SV=2	S	Function unknown	seed allergenic protein RAG2-like [Oryza sativa Japonica Group]
BGIOSGA029394	3	12	6	189	128	130	0.101552	0.453427	0.222488	7.77754	4.46744	5.15291	1.72488e-20	3.70627	up	--	--	--	--	--	--	--	--	Protein TILLER ANGLE CONTROL 1 OS=Oryza sativa subsp. indica OX=39946 GN=TAC1 PE=2 SV=1	S	Function unknown	uncharacterized protein LOC4347655 isoform X4 [Oryza sativa Japonica Group]
BGIOSGA033498	472	409	286	108	111	158	38.6681	32.8034	23.8576	9.33289	8.12794	13.1589	7.31426e-05	-1.2515	down	--	--	Molecular Function: oxidoreductase activity (GO:0016491);; Molecular Function: oxidoreductase activity, acting on the CH-OH group of donors, NAD or NADP as acceptor (GO:0016616);;	--	--	[V]	Defense mechanisms	--	--	M	Cell wall/membrane/envelope biogenesis	putative cinnamoyl-CoA reductase [Oryza sativa Japonica Group]
BGIOSGA026785	146	175	229	266	963	701	8.13244	9.53502	12.9913	15.7018	48.0905	39.8278	8.16706e-05	1.73418	up	--	--	Molecular Function: electron carrier activity (GO:0009055);;	--	--	--	--	Plastocyanin-like domain	Uclacyanin 1 OS=Arabidopsis thaliana OX=3702 GN=UCC1 PE=1 SV=1	S	Function unknown	blue copper protein [Oryza sativa Japonica Group]
BGIOSGA035496	235	204	202	11	26	12	3.34666	2.84556	2.92668	0.161915	0.328241	0.16413	6.33914e-14	-2.85364	down	--	--	--	K13457|9.2e-80|ats:109763291|K13457 disease resistance protein RPM1 | (RefSeq) LOC109763291; disease resistance protein RPM1-like	Plant-pathogen interaction (ko04626)	--	--	Leucine Rich repeats (2 copies)	Disease resistance protein Pik-2 OS=Oryza sativa subsp. japonica OX=39947 GN=PIK-2 PE=3 SV=1	S	Function unknown	hypothetical protein OsI_36582 [Oryza sativa Indica Group]
BGIOSGA021126	4	5	14	28	104	50	0.209322	0.305747	0.868964	1.82998	5.89659	3.22439	0.000535138	1.97302	up	--	--	Biological Process: response to acid chemical (GO:0001101);; Molecular Function: molecular_function (GO:0003674);; Molecular Function: enzyme inhibitor activity (GO:0004857);; Molecular Function: protein phosphatase inhibitor activity (GO:0004864);; Molecular Function: binding (GO:0005488);; Molecular Function: protein binding (GO:0005515);; Cellular Component: cellular_component (GO:0005575);; C…	K14496|7.6e-43|dosa:Os06t0528300-00|K14496 abscisic acid receptor PYR/PYL family | (RefSeq) Os06g0528300; Similar to Polyketide cyclase.	MAPK signaling pathway - plant (ko04016);; Plant hormone signal transduction (ko04075)	--	--	--	Abscisic acid receptor PYL3 OS=Oryza sativa subsp. japonica OX=39947 GN=PYL3 PE=1 SV=1	--	--	hypothetical protein OsI_23208 [Oryza sativa Indica Group]
BGIOSGA031256	152	196	180	10	4	22	12.2331	15.4816	14.7541	0.831358	0.262157	1.74276	3.56348e-11	-2.83686	down	[O]	Posttranslational modification, protein turnover, chaperones	Biological Process: cell redox homeostasis (GO:0045454);;	K03671|9.5e-65|osa:4347843|K03671 thioredoxin 1 | (RefSeq) thioredoxin H2-2-like isoform X1	--	[O]	Posttranslational modification, protein turnover, chaperones	Thioredoxin	Thioredoxin H2-2 OS=Oryza sativa subsp. japonica OX=39947 GN=Os03g0800700 PE=2 SV=1	O	Posttranslational modification, protein turnover, chaperones	hypothetical protein OsI_32377 [Oryza sativa Indica Group]
BGIOSGA037460	81	62	30	8	8	10	4.11632	3.094	1.52454	0.387155	0.360303	0.494406	0.00118584	-1.74137	down	--	--	Molecular Function: protein dimerization activity (GO:0046983);;	K12126|3.6e-10|thj:104820437|K12126 phytochrome-interacting factor 3 | (RefSeq) transcription factor PIF3-like isoform X1	Plant hormone signal transduction (ko04075);; Circadian rhythm - plant (ko04712)	--	--	Helix-loop-helix DNA-binding domain	Transcription factor BHLH133 OS=Oryza sativa subsp. japonica OX=39947 GN=BHLH133 PE=2 SV=1	S	Function unknown	hypothetical protein OsI_38473 [Oryza sativa Indica Group]
BGIOSGA004423	45	54	70	173	193	88	2.0114	2.35499	3.16336	8.18101	7.74807	4.02444	0.000970073	1.43163	up	--	--	Molecular Function: metal ion binding (GO:0046872);;	K23047|2.8e-38|csv:101211149|K23047 E3 ubiquitin-protein ligase UNKL [EC:2.3.2.27] | (RefSeq) zinc finger CCCH domain-containing protein 2	--	[R]	General function prediction only	--	Zinc finger CCCH domain-containing protein 10 OS=Oryza sativa subsp. japonica OX=39947 GN=Os01g0738400 PE=2 SV=1	S	Function unknown	hypothetical protein OsI_03666 [Oryza sativa Indica Group]
BGIOSGA019500	2829	2455	1841	546	832	694	28.0845	23.8775	18.6068	5.72502	7.38324	7.00246	2.73086e-07	-1.39857	down	[T]	Signal transduction mechanisms	Molecular Function: protein kinase activity (GO:0004672);; Molecular Function: ATP binding (GO:0005524);; Cellular Component: integral component of membrane (GO:0016021);;	K13418|3.6e-69|mesc:110628076|K13418 somatic embryogenesis receptor kinase 1 [EC:2.7.10.1 2.7.11.1] | (RefSeq) somatic embryogenesis receptor kinase 2-like isoform X1	--	--	--	Protein tyrosine and serine/threonine kinase	Probable LRR receptor-like serine/threonine-protein kinase At1g56140 OS=Arabidopsis thaliana OX=3702 GN=At1g56140 PE=2 SV=2	S	Function unknown	probable LRR receptor-like serine/threonine-protein kinase At1g56130 isoform X1 [Oryza sativa Japonica Group]
BGIOSGA013013	196	198	232	45	33	25	7.26545	7.16355	8.72972	1.75697	1.07238	0.922334	2.69001e-11	-2.10712	down	--	--	Cellular Component: nucleus (GO:0005634);; Biological Process: regulation of transcription, DNA-templated (GO:0006355);; Molecular Function: zinc ion binding (GO:0008270);;	--	--	--	--	--	--	--	--	hypothetical protein OsI_12370 [Oryza sativa Indica Group]
BGIOSGA007556	648	586	412	61	165	228	18.9093	16.7691	12.2275	1.87231	4.30724	6.77168	0.00546694	-1.29635	down	--	--	--	--	--	--	--	Protein of unknown function (DUF1668)	--	S	Function unknown	uncharacterized protein LOC4328324 [Oryza sativa Japonica Group]
BGIOSGA001352	57	63	40	303	378	390	2.08204	2.25812	1.46846	11.7698	12.4452	14.6034	1.68543e-23	2.7712	up	[R]	General function prediction only	--	K06889|2.7e-152|dosa:Os01t0579900-01|K06889 uncharacterized protein | (RefSeq) Os01g0579900; Esterase/lipase/thioesterase domain containing protein.	--	[I]	Lipid transport and metabolism	Serine aminopeptidase, S33	--	S	Function unknown	hypothetical protein OsI_02555 [Oryza sativa Indica Group]
BGIOSGA008780	87	181	191	386	252	351	4.8784	9.98692	10.9334	23.03	12.7073	20.1648	0.000882406	1.21489	up	--	--	--	--	--	--	--	Arabidopsis protein of unknown function	--	--	--	hypothetical protein OsI_08412 [Oryza sativa Indica Group]
BGIOSGA006907	81	177	297	671	415	594	1.57333	3.37361	5.90013	13.8521	7.2463	11.8128	0.000209298	1.55768	up	[Q]	Secondary metabolites biosynthesis, transport and catabolism	Biological Process: fatty acid biosynthetic process (GO:0006633);; Cellular Component: integral component of membrane (GO:0016021);; Molecular Function: transferase activity, transferring acyl groups other than amino-acyl groups (GO:0016747);;	K15397|2.1e-299|dosa:Os02t0205500-01|K15397 3-ketoacyl-CoA synthase [EC:2.3.1.199] | (RefSeq) Os02g0205500; Similar to Fatty acid elongase 1.	Fatty acid elongation (ko00062);; Plant-pathogen interaction (ko04626)	--	--	FAE1/Type III polyketide synthase-like protein	3-ketoacyl-CoA synthase 11 OS=Arabidopsis thaliana OX=3702 GN=KCS11 PE=1 SV=1	I	Lipid transport and metabolism	hypothetical protein OsI_06307 [Oryza sativa Indica Group]
BGIOSGA011032	184	162	211	402	571	394	4.57755	3.94231	5.34966	10.6036	12.7457	9.98825	5.74835e-07	1.4576	up	[T]	Signal transduction mechanisms	Molecular Function: protein serine/threonine phosphatase activity (GO:0004722);; Cellular Component: nucleus (GO:0005634);; Biological Process: abscisic acid-activated signaling pathway (GO:0009738);; Biological Process: seed germination (GO:0009845);; Molecular Function: metal ion binding (GO:0046872);;	K14497|4.6e-193|dosa:Os03t0268600-01|K14497 protein phosphatase 2C [EC:3.1.3.16] | (RefSeq) Os03g0268600; Similar to Protein phosphatase type 2C.	MAPK signaling pathway - plant (ko04016);; Plant hormone signal transduction (ko04075)	[T]	Signal transduction mechanisms	Protein phosphatase 2C	Probable protein phosphatase 2C 30 OS=Oryza sativa subsp. japonica OX=39947 GN=PP2C30 PE=1 SV=1	T	Signal transduction mechanisms	hypothetical protein OsI_10903 [Oryza sativa Indica Group]
Oryza_sativa_newGene_6118	2290	2781	3203	20909	487743	250822	123.959	147.592	176.632	1197.38	23628.2	13821.9	0.000176011	2.15842	up	--	--	--	--	--	--	--	--	Prolamin PPROL 14E OS=Oryza sativa subsp. indica OX=39946 PE=3 SV=1	--	--	prolamine [Oryza sativa Japonica Group]
BGIOSGA017970	88	104	96	247	386	159	2.23304	2.58656	2.49486	6.67745	8.82447	4.12501	0.000189461	1.50543	up	[BQ]	Chromatin structure and dynamics;; Secondary metabolites biosynthesis, transport and catabolism	Molecular Function: hydrolase activity (GO:0016787);;	K11406|5.5e-42|cam:101488469|K11406 histone deacetylase 4/5 [EC:3.5.1.98] | (RefSeq) histone deacetylase 5-like	--	[B]	Chromatin structure and dynamics	Histone deacetylase domain	Histone deacetylase 8 OS=Arabidopsis thaliana OX=3702 GN=HDA8 PE=2 SV=1	BQ	Chromatin structure and dynamics;; Secondary metabolites biosynthesis, transport and catabolism	hypothetical protein OsI_20117 [Oryza sativa Indica Group]
BGIOSGA036905	807	606	496	63	29	62	55.0304	40.4941	34.3952	4.47976	1.72674	4.25603	4.47995e-24	-3.05237	down	--	--	Cellular Component: integral component of membrane (GO:0016021);;	K19038|1.4e-09|ini:109187273|K19038 E3 ubiquitin-protein ligase ATL41 [EC:2.3.2.27] | (RefSeq) RING-H2 finger protein ATL40-like	--	[O]	Posttranslational modification, protein turnover, chaperones	Ring finger domain	RING-H2 finger protein ATL32 OS=Arabidopsis thaliana OX=3702 GN=ATL32 PE=2 SV=3	S	Function unknown	Zinc finger, C3HC4 type family protein, expressed [Oryza sativa Japonica Group]
BGIOSGA004268	28	17	24	51	93	125	0.907626	0.555547	0.802839	1.79594	2.77585	4.22628	0.000222554	1.7544	up	[T]	Signal transduction mechanisms	Molecular Function: protein serine/threonine kinase activity (GO:0004674);; Molecular Function: ATP binding (GO:0005524);;	K20716|1.4e-130|obr:102708397|K20716 mitogen-activated protein kinase kinase kinase 17/18 | (RefSeq) mitogen-activated protein kinase kinase kinase ANP1-like	MAPK signaling pathway - plant (ko04016)	[T]	Signal transduction mechanisms	Protein kinase domain	Mitogen-activated protein kinase kinase kinase 17 OS=Arabidopsis thaliana OX=3702 GN=MAPKKK17 PE=1 SV=1	T	Signal transduction mechanisms	hypothetical protein OsI_03399 [Oryza sativa Indica Group]
BGIOSGA008625	81	65	43	3	9	13	2.17835	1.70142	1.15767	0.064636	0.21646	0.336898	0.000978644	-1.80085	down	--	--	--	K13420|4.1e-18|nnu:109115272|K13420 LRR receptor-like serine/threonine-protein kinase FLS2 [EC:2.7.11.1] | (RefSeq) receptor kinase-like protein Xa21	MAPK signaling pathway - plant (ko04016);; Plant-pathogen interaction (ko04626)	--	--	Leucine rich repeat	Putative receptor-like protein kinase At3g47110 OS=Arabidopsis thaliana OX=3702 GN=At3g47110 PE=3 SV=1	--	--	hypothetical protein OsI_08073 [Oryza sativa Indica Group]
BGIOSGA027152	0	0	0	122	104	142	0	0	0	11.4009	8.1896	12.7001	1.28381e-29	5.0544	up	--	--	--	--	--	--	--	Myb/SANT-like DNA-binding domain	--	--	--	hypothetical protein OsI_28859 [Oryza sativa Indica Group]
BGIOSGA026645	309	226	291	115	104	71	7.0227	5.035	6.71895	2.75441	2.09591	1.62064	0.000555425	-1.13702	down	--	--	--	--	--	--	--	--	--	--	--	hypothetical protein OsI_29933 [Oryza sativa Indica Group]
BGIOSGA024609	15408	14344	18767	53945	363262	118828	937.992	855.599	1163.31	3471.65	19775.6	7358.47	0.000225969	2.11112	up	--	--	Molecular Function: serine-type endopeptidase inhibitor activity (GO:0004867);; Molecular Function: IgE binding (GO:0019863);;	--	--	--	--	Protease inhibitor/seed storage/LTP family	Seed allergenic protein RAG2 OS=Oryza sativa subsp. japonica OX=39947 GN=RAG2 PE=1 SV=2	S	Function unknown	seed allergenic protein RAG2 [Oryza sativa Japonica Group]
BGIOSGA019125	359	206	183	81	103	54	5.70704	3.2084	2.95904	1.35802	1.46193	0.864612	0.008306	-1.16594	down	--	--	Molecular Function: molecular_function (GO:0003674);; Molecular Function: nucleic acid binding (GO:0003676);; Molecular Function: RNA binding (GO:0003723);; Molecular Function: catalytic activity (GO:0003824);; Molecular Function: nuclease activity (GO:0004518);; Molecular Function: endonuclease activity (GO:0004519);; Molecular Function: binding (GO:0005488);; Cellular Component: cellular_compon…	--	--	[R]	General function prediction only	PPR repeat family	Pentatricopeptide repeat-containing protein At3g48810 OS=Arabidopsis thaliana OX=3702 GN=At3g48810 PE=2 SV=1	S	Function unknown	pentatricopeptide repeat-containing protein At3g48810 [Oryza sativa Japonica Group]
BGIOSGA025576	3912	3256	2825	1215	1280	1352	40.7823	33.2634	29.9877	13.3909	11.9338	14.3333	1.72355e-08	-1.07247	down	[G]	Carbohydrate transport and metabolism	Molecular Function: hydrolase activity, hydrolyzing O-glycosyl compounds (GO:0004553);; Biological Process: carbohydrate metabolic process (GO:0005975);; Molecular Function: carbohydrate binding (GO:0030246);;	K05546|4.4e-101|ota:OT_ostta08g02820|K05546 mannosyl-oligosaccharide alpha-1,3-glucosidase [EC:3.2.1.207] | (RefSeq) Glycoside hydrolase, superfamily	N-Glycan biosynthesis (ko00510);; Protein processing in endoplasmic reticulum (ko04141)	[GMO]	Carbohydrate transport and metabolism;; Cell wall/membrane/envelope biogenesis;; Posttranslational modification, protein turnover, chaperones	Glycosyl hydrolases family 31	Probable glucan 1,3-alpha-glucosidase OS=Arabidopsis thaliana OX=3702 GN=PSL5 PE=1 SV=1	G	Carbohydrate transport and metabolism	hypothetical protein OsI_25772 [Oryza sativa Indica Group]
Oryza_sativa_newGene_5175	0	0	0	266	186	248	0	0	0	25.5804	15.0856	22.9331	1.80187e-46	5.96822	up	--	--	--	--	--	--	--	--	--	--	--	Os09g0315750 [Oryza sativa Japonica Group]
BGIOSGA009415	584	623	752	743	1634	1197	14.3684	15.0221	18.8479	19.3205	35.9562	29.9538	0.00440376	1.04612	up	--	--	Molecular Function: GTPase activator activity (GO:0005096);; Molecular Function: metal ion binding (GO:0046872);;	K12493|2.7e-217|dosa:Os03t0854100-01|K12493 ADP-ribosylation factor GTPase-activating protein 2/3 | (RefSeq) Os03g0854100; Similar to ARF GAP-like zinc finger-containing protein ZIGA2 (Fragment).	Endocytosis (ko04144)	[T]	Signal transduction mechanisms	Putative GTPase activating protein for Arf	Probable ADP-ribosylation factor GTPase-activating protein AGD8 OS=Arabidopsis thaliana OX=3702 GN=AGD8 PE=1 SV=1	U	Intracellular trafficking, secretion, and vesicular transport	hypothetical protein OsI_14379 [Oryza sativa Indica Group]
BGIOSGA014460	73	64	143	15	16	12	1.29903	1.10621	2.58591	0.281473	0.249178	0.211309	9.17262e-05	-1.87395	down	--	--	Molecular Function: molecular_function (GO:0003674);; Molecular Function: structural molecule activity (GO:0005198);; Molecular Function: binding (GO:0005488);; Molecular Function: protein binding (GO:0005515);; Cellular Component: cellular_component (GO:0005575);; Cellular Component: extracellular region (GO:0005576);; Cellular Component: extracellular space (GO:0005615);; Cellular Component: in…	--	--	--	--	F-box associated domain	--	S	Function unknown	hypothetical protein OsI_17167 [Oryza sativa Indica Group]
BGIOSGA022952	106	120	122	47	26	49	2.51504	2.79833	2.94255	1.17913	0.543496	1.17402	0.00466943	-1.11438	down	--	--	Molecular Function: protein binding (GO:0005515);;	--	--	--	--	FBD	F-box/FBD/LRR-repeat protein At5g22700 OS=Arabidopsis thaliana OX=3702 GN=At5g22700 PE=2 SV=2	S	Function unknown	hypothetical protein OsI_23059 [Oryza sativa Indica Group]
BGIOSGA028232	400	384	302	324	1674	1024	8.41187	7.90938	6.46485	7.20557	31.4957	21.9198	0.00396839	1.42262	up	--	--	Cellular Component: integral component of membrane (GO:0016021);;	--	--	--	--	--	Uncharacterized membrane protein At1g16860 OS=Arabidopsis thaliana OX=3702 GN=At1g16860 PE=1 SV=1	S	Function unknown	hypothetical protein EE612_042900, partial [Oryza sativa]
BGIOSGA000096	21	29	16	29	237	120	0.718666	0.943006	0.535788	1.0457	7.25086	4.16799	0.00119882	1.83931	up	--	--	--	--	--	--	--	--	--	S	Function unknown	hypothetical protein OsI_05232 [Oryza sativa Indica Group]
Oryza_sativa_newGene_4495	321	137	174	953	1256	1154	2.79572	0.992159	1.34465	6.81967	7.51687	7.90303	5.54676e-14	2.40262	up	--	--	Biological Process: telomere maintenance (GO:0000723);; Molecular Function: DNA helicase activity (GO:0003678);; Molecular Function: ATP binding (GO:0005524);; Biological Process: DNA repair (GO:0006281);; Biological Process: DNA recombination (GO:0006310);;	K15255|9.5e-16|han:110943601|K15255 ATP-dependent DNA helicase PIF1 [EC:3.6.4.12] | (RefSeq) uncharacterized protein LOC110943601	--	[D]	Cell cycle control, cell division, chromosome partitioning	--	--	D	Cell cycle control, cell division, chromosome partitioning	hypothetical protein EE612_061058, partial [Oryza sativa]
BGIOSGA022850	3332	4021	5445	9019	11576	6129	121.844	144.082	202.757	348.667	378.536	227.973	0.000105561	1.23323	up	--	--	Cellular Component: cellular_component (GO:0005575);; Cellular Component: intracellular (GO:0005622);; Cellular Component: cell (GO:0005623);; Cellular Component: nucleus (GO:0005634);; Cellular Component: nucleolus (GO:0005730);; Cellular Component: cytoplasm (GO:0005737);; Cellular Component: cytosol (GO:0005829);; Biological Process: cellular ion homeostasis (GO:0006873);; Biological Process: …	--	--	--	--	Seed maturation protein	Late embryogenesis abundant protein D-34 OS=Gossypium hirsutum OX=3635 PE=3 SV=1	S	Function unknown	late embryogenesis abundant protein D-34 [Oryza sativa Japonica Group]
Oryza_sativa_newGene_7519	70	56	59	6	0	0	0.891437	0.756059	0.764026	0.079797	0	0	1.5628e-05	-2.40709	down	--	--	--	--	--	--	--	--	--	--	--	hypothetical protein OsJ_35973 [Oryza sativa Japonica Group]
BGIOSGA025241	60	39	63	79	328	108	3.52636	2.22772	3.80301	4.92997	17.4004	6.47994	0.0090263	1.4454	up	--	--	Biological Process: lipid transport (GO:0006869);; Molecular Function: peptidase activity (GO:0008233);; Molecular Function: lipid binding (GO:0008289);;	--	--	--	--	Probable lipid transfer	--	S	Function unknown	non-specific lipid-transfer protein-like protein At2g13820 [Oryza sativa Japonica Group]
BGIOSGA000175	0	0	0	226	220	196	0	0	0	19.5417	16.0809	16.3039	4.77269e-44	5.85544	up	--	--	--	--	--	--	--	--	Esterase PIR7B OS=Oryza sativa subsp. indica OX=39946 GN=PIR7B PE=3 SV=2	--	--	hypothetical protein OsI_05083 [Oryza sativa Indica Group]
BGIOSGA022243	123	282	393	666	642	523	13.4986	30.4464	44.1402	77.6849	63.3528	58.7097	0.00209963	1.26733	up	--	--	--	--	--	--	--	--	--	S	Function unknown	uncharacterized protein LOC4340022 [Oryza sativa Japonica Group]
BGIOSGA000267	70	65	67	24	21	22	1.19439	1.09325	1.17066	0.435117	0.309871	0.380115	0.0099117	-1.13443	down	--	--	--	K22733|4.6e-77|cit:102612526|K22733 magnesium transporter | (RefSeq) uncharacterized protein LOC102612526	--	[R]	General function prediction only	PPR repeat	Putative pentatricopeptide repeat-containing protein At3g49142 OS=Arabidopsis thaliana OX=3702 GN=PCMP-H77 PE=3 SV=1	S	Function unknown	hypothetical protein OsI_04901 [Oryza sativa Indica Group]
BGIOSGA018788	9547	13393	17368	23666	22894	23069	74.1402	101.924	137.346	194.303	159.004	182.251	6.02849e-05	1.00185	up	[R]	General function prediction only	Molecular Function: GTP binding (GO:0005525);; Molecular Function: hydrolase activity, acting on acid anhydrides (GO:0016817);;	K00031|2.8e-13|ghi:107885926|K00031 isocitrate dehydrogenase [EC:1.1.1.42] | (RefSeq) cytosolic isocitrate dehydrogenase [NADP]-like	Citrate cycle (TCA cycle) (ko00020);; Glutathione metabolism (ko00480);; Carbon metabolism (ko01200);; 2-Oxocarboxylic acid metabolism (ko01210);; Biosynthesis of amino acids (ko01230);; Peroxisome (ko04146)	--	--	Translocase of chloroplast 159/132, membrane anchor domain	Translocase of chloroplast 159, chloroplastic OS=Arabidopsis thaliana OX=3702 GN=TOC159 PE=1 SV=1	S	Function unknown	hypothetical protein OsI_18487 [Oryza sativa Indica Group]
BGIOSGA018229	54	70	48	121	108	114	6.37141	8.02984	5.68667	15.0107	11.3139	13.666	0.000767103	1.14542	up	--	--	--	--	--	--	--	--	--	S	Function unknown	hypothetical protein OsI_19586 [Oryza sativa Indica Group]
BGIOSGA031162	97	127	75	5	2	12	1.73067	2.22578	1.36576	0.07889	0.031701	0.21743	3.60558e-08	-2.64664	down	--	--	Cellular Component: integral component of membrane (GO:0016021);;	--	--	--	--	--	--	--	--	hypothetical protein OsI_32186 [Oryza sativa Indica Group]
BGIOSGA008142	540	393	443	155	95	113	25.1526	17.9571	21.0194	7.60417	3.95122	5.32299	1.02827e-09	-1.56789	down	--	--	--	--	--	--	--	Protein of unknown function (DUF3615)	--	S	Function unknown	hypothetical protein OsI_07080 [Oryza sativa Indica Group]
BGIOSGA013361	268	223	227	21	28	6	2.84363	2.31593	2.45226	0.234947	0.264782	0.05992	8.22871e-11	-2.72686	down	[R]	General function prediction only	Biological Process: defense response (GO:0006952);; Molecular Function: ADP binding (GO:0043531);;	K15078|9.8e-61|spen:107032673|K15078 structure-specific endonuclease subunit SLX1 [EC:3.6.1.-] | (RefSeq) putative disease resistance protein RGA3	--	[T]	Signal transduction mechanisms	NB-ARC domain	Putative disease resistance RPP13-like protein 1 OS=Arabidopsis thaliana OX=3702 GN=RPPL1 PE=3 SV=1	S	Function unknown	putative nucleotide-binding leucine-rich-repeat protein [Oryza sativa Japonica Group]
BGIOSGA001353	295	269	237	39	30	38	10.8399	9.69571	8.87136	1.5122	0.978237	1.40792	6.65852e-20	-2.44641	down	[R]	General function prediction only	--	K06889|1.6e-152|dosa:Os01t0579900-01|K06889 uncharacterized protein | (RefSeq) Os01g0579900; Esterase/lipase/thioesterase domain containing protein.	--	[I]	Lipid transport and metabolism	Serine aminopeptidase, S33	--	S	Function unknown	hypothetical protein OsI_02551 [Oryza sativa Indica Group]
Oryza_sativa_newGene_7390	71	65	31	0	0	3	2.70076	2.43019	1.17917	0	0	0.115369	9.47404e-07	-2.66703	down	--	--	Molecular Function: kinase activity (GO:0016301);;	K02218|1.1e-40|sbi:8069780|K02218 casein kinase 1 [EC:2.7.11.1] | (RefSeq) uncharacterized protein LOC8069780	--	[L]	Replication, recombination and repair	DDE superfamily endonuclease	--	L	Replication, recombination and repair	PREDICTED: putative nuclease HARBI1 [Oryza brachyantha]
BGIOSGA035075	74	79	65	0	0	0	2.79132	2.93049	2.49798	0	0	0	3.3592e-15	-3.8661	down	--	--	Cellular Component: integral component of membrane (GO:0016021);;	K15503|3.6e-13|bvg:104891722|K15503 serine/threonine-protein phosphatase 6 regulatory ankyrin repeat subunit B | (RefSeq) uncharacterized LOC104891722	--	[R]	General function prediction only	Domain of unknown function	Protein ACCELERATED CELL DEATH 6 OS=Arabidopsis thaliana OX=3702 GN=ACD6 PE=1 SV=1	S	Function unknown	hypothetical protein OsI_35694 [Oryza sativa Indica Group]
BGIOSGA039687	902	728	568	257	222	258	49.8111	39.4051	31.9205	15.0062	10.9656	14.4562	1.78352e-07	-1.24782	down	--	--	Molecular Function: molecular_function (GO:0003674);; Molecular Function: binding (GO:0005488);; Molecular Function: protein binding (GO:0005515);; Cellular Component: cellular_component (GO:0005575);; Cellular Component: intracellular (GO:0005622);; Cellular Component: cell (GO:0005623);; Cellular Component: cytoplasm (GO:0005737);; Cellular Component: endosome (GO:0005768);; Cellular Component:…	K12200|1.9e-90|dosa:Os10t0495300-01|K12200 programmed cell death 6-interacting protein | (RefSeq) Os10g0495300; Similar to ALG2-interacting protein X.	Endocytosis (ko04144)	[R]	General function prediction only	BRO1-like domain	Vacuolar-sorting protein BRO1 OS=Arabidopsis thaliana OX=3702 GN=BRO1 PE=1 SV=1	S	Function unknown	hypothetical protein OsI_34170 [Oryza sativa Indica Group]
Oryza_sativa_newGene_1032	334	305	174	0	0	0	8.3004	7.41465	4.36661	0	0	0	3.42224e-35	-5.44371	down	--	--	--	--	--	--	--	--	--	--	--	hypothetical protein [Oryza sativa Japonica Group]
Oryza_sativa_newGene_2258	117	103	90	2	0	0	3.79996	3.16915	2.90654	0.070664	0	0	1.17284e-18	-4.09381	down	--	--	Cellular Component: integral component of membrane (GO:0016021);;	--	--	--	--	--	--	--	--	hypothetical protein DAI22_04g100750 [Oryza sativa Japonica Group]
BGIOSGA017562	14	20	49	82	371	268	0.554137	0.81778	2.1129	3.64509	14.0884	11.5584	3.91766e-06	2.357	up	--	--	Biological Process: endomembrane system organization (GO:0010256);; Cellular Component: integral component of membrane (GO:0016021);;	K01510|5.0e-30|peq:110028934|K01510 apyrase [EC:3.6.1.5] | (RefSeq) probable apyrase 6 isoform X1	Purine metabolism (ko00230);; Pyrimidine metabolism (ko00240)	--	--	Protein of unknown function (DUF679)	Protein DMP6 OS=Arabidopsis thaliana OX=3702 GN=DMP6 PE=2 SV=1	S	Function unknown	protein DMP6 [Oryza sativa Japonica Group]
BGIOSGA038017	0	0	0	123	173	161	0	0	0	10.8567	12.9526	13.7195	4.862e-32	5.23993	up	--	--	--	--	--	--	--	--	--	--	--	Os04g0330400 [Oryza sativa Japonica Group]
Oryza_sativa_newGene_5621	865	858	956	9	2	44	9.46179	9.65594	11.0081	0.082228	0.012298	0.445151	0.000176011	-2.16953	down	--	--	Molecular Function: kinase activity (GO:0016301);;	K02218|2.7e-26|sbi:8069780|K02218 casein kinase 1 [EC:2.7.11.1] | (RefSeq) uncharacterized protein LOC8069780	--	[L]	Replication, recombination and repair	DDE superfamily endonuclease	--	L	Replication, recombination and repair	PREDICTED: putative nuclease HARBI1 [Oryza brachyantha]
BGIOSGA035383	349	411	497	1564	51247	20429	26.0491	30.0549	37.7819	123.518	3425.7	1553.42	0.00190254	1.83608	up	--	--	--	--	--	--	--	Protease inhibitor/seed storage/LTP family	10 kDa prolamin OS=Oryza sativa subsp. indica OX=39946 GN=OsI_013205 PE=2 SV=2	--	--	prolamin, putative, expressed [Oryza sativa Japonica Group]
BGIOSGA016926	101	78	61	127	128	195	11.5103	8.62053	7.068	15.3194	12.9777	22.6133	0.00769664	1.03957	up	--	--	--	--	--	--	--	--	--	--	--	hypothetical protein DAI22_04g227000 [Oryza sativa Japonica Group]
BGIOSGA030811	0	0	0	84	37	28	0	0	0	4.15599	1.52757	1.32877	9.1424e-10	3.22458	up	--	--	--	--	--	--	--	--	--	--	--	hypothetical protein OsI_31477 [Oryza sativa Indica Group]
Oryza_sativa_newGene_1539	42	49	44	822	643	620	0.381252	0.432338	0.39979	8.77393	5.84242	6.36601	2.00262e-76	3.99532	up	--	--	Molecular Function: nucleic acid binding (GO:0003676);; Biological Process: DNA integration (GO:0015074);;	--	--	--	--	Integrase core domain	--	L	Replication, recombination and repair	retrotransposon protein, putative, Ty3-gypsy subclass, expressed [Oryza sativa Japonica Group]
BGIOSGA003728	475	328	241	126	113	128	6.60381	4.46765	3.40442	1.84073	1.40429	1.80302	0.000840307	-1.13234	down	[R]	General function prediction only	Biological Process: defense response (GO:0006952);; Molecular Function: ADP binding (GO:0043531);;	K13457|0.0e+00|dosa:Os01t0547000-01|K13457 disease resistance protein RPM1 | (RefSeq) Os01g0547000; Similar to LRR19.	Plant-pathogen interaction (ko04626)	[T]	Signal transduction mechanisms	NB-ARC domain	Disease resistance protein RPM1 OS=Arabidopsis thaliana OX=3702 GN=RPM1 PE=1 SV=1	S	Function unknown	hypothetical protein OsI_02353 [Oryza sativa Indica Group]
BGIOSGA010806	22	42	77	76	551	212	1.1438	2.14744	4.14479	4.23856	26.2063	11.4334	0.000698161	1.89249	up	--	--	Molecular Function: calcium ion binding (GO:0005509);;	K13448|2.3e-102|dosa:Os03t0331700-02|K13448 calcium-binding protein CML | (RefSeq) Os03g0331700; Similar to cDNA clone:002-120-A09, full insert sequence.	Plant-pathogen interaction (ko04626)	[T]	Signal transduction mechanisms	EF hand	Probable calcium-binding protein CML27 OS=Oryza sativa subsp. japonica OX=39947 GN=CML27 PE=2 SV=1	DTZ	Cell cycle control, cell division, chromosome partitioning;; Signal transduction mechanisms;; Cytoskeleton	probable calcium-binding protein CML27 [Oryza sativa Japonica Group]
BGIOSGA003418	259	378	499	611	864	705	4.22938	6.04625	8.30479	10.5473	12.6218	11.7188	0.000884124	1.11405	up	[G]	Carbohydrate transport and metabolism	Molecular Function: sucrose alpha-glucosidase activity (GO:0004575);; Biological Process: sucrose catabolic process (GO:0005987);; Molecular Function: glycopeptide alpha-N-acetylgalactosaminidase activity (GO:0033926);;	K03884|2.6e-22|nau:109243048|K03884 NADH-ubiquinone oxidoreductase chain 6 [EC:7.1.1.2] | (RefSeq) uncharacterized protein LOC109243048	Oxidative phosphorylation (ko00190)	--	--	Alkaline and neutral invertase	Neutral/alkaline invertase 1, mitochondrial OS=Oryza sativa subsp. japonica OX=39947 GN=NIN1 PE=1 SV=1	S	Function unknown	hypothetical protein OsI_01715 [Oryza sativa Indica Group]
Oryza_sativa_newGene_3972	99	258	401	500	877	585	0.722039	2.70385	4.93645	4.78723	8.32044	7.16474	0.00466223	1.35057	up	--	--	--	--	--	--	--	--	--	--	--	Os01g0661750 [Oryza sativa Japonica Group]
Oryza_sativa_newGene_2013	764	595	512	0	0	0	7.39188	5.64034	5.03827	0	0	0	9.26154e-64	-6.72936	down	--	--	--	--	--	--	--	--	--	--	--	unknown protein [Oryza sativa Japonica Group]
BGIOSGA000836	90	180	293	354	518	592	1.4237	2.8014	4.74183	5.94783	7.373	9.59437	0.001469	1.39048	up	--		Molecular Function: protein kinase activity (GO:0004672);; Molecular Function: ATP binding (GO:0005524);;	K01968|5.0e-53|tcc:18613295|K01968 3-methylcrotonyl-CoA carboxylase alpha subunit [EC:6.4.1.4] | (RefSeq) methylcrotonoyl-CoA carboxylase subunit alpha, mitochondrial	Valine, leucine and isoleucine degradation (ko00280)	[T]	Signal transduction mechanisms	Protein tyrosine and serine/threonine kinase	Serine/threonine/tyrosine-protein kinase HT1 OS=Arabidopsis thaliana OX=3702 GN=HT1 PE=1 SV=1	T	Signal transduction mechanisms	hypothetical protein OsI_03719 [Oryza sativa Indica Group]
BGIOSGA002801	68	77	75	883	458	532	1.28535	1.42563	1.43023	17.6855	7.76723	10.2584	9.49777e-32	3.0867	up	--	--	Cellular Component: cytosolic ribosome (GO:0022626);;	--	--	[R]	General function prediction only	PPR repeat family	Putative pentatricopeptide repeat-containing protein At3g15200 OS=Arabidopsis thaliana OX=3702 GN=At3g15200 PE=3 SV=1	S	Function unknown	hypothetical protein OsI_00429 [Oryza sativa Indica Group]
BGIOSGA027023	209	237	161	44	35	68	4.49778	5.00693	3.52197	0.988942	0.657304	1.48515	8.01977e-06	-1.58456	down	--	--	--	K03283|6.4e-29|zju:107413482|K03283 heat shock 70kDa protein 1/2/6/8 | (RefSeq) heat shock cognate 70 kDa protein 2-like isoform X1	Spliceosome (ko03040);; Protein processing in endoplasmic reticulum (ko04141);; Endocytosis (ko04144)	--	--	C1 domain	--	--	--	hypothetical protein OsI_29134 [Oryza sativa Indica Group]
BGIOSGA012580	2485	2714	3029	3693	6436	4600	29.3408	31.396	36.4104	46.097	67.95	55.241	0.000310593	1.05406	up	--	--	--	--	--	[L]	Replication, recombination and repair	--	--	L	Replication, recombination and repair	hypothetical protein OsI_11468 [Oryza sativa Indica Group]
Oryza_sativa_newGene_6626	354	233	176	24	43	42	5.0594	3.26449	2.54931	0.362035	0.546009	0.599797	4.31617e-08	-2.1349	down	--	--	--	--	--	--	--	--	--	--	--	Hypothetical protein [Oryza sativa Japonica Group]
BGIOSGA034307	219	136	142	0	0	0	3.1972	1.93902	2.11043	0	0	0	7.84916e-27	-4.8804	down	--	--	Cellular Component: integral component of membrane (GO:0016021);; Molecular Function: ADP binding (GO:0043531);;	K12818|5.5e-13|mtr:MTR_0267s0070|K12818 ATP-dependent RNA helicase DHX8/PRP22 [EC:3.6.4.13] | (RefSeq) NB-ARC domain disease resistance protein, putative	Spliceosome (ko03040)	[T]	Signal transduction mechanisms	Leucine rich repeat	Putative disease resistance protein At3g14460 OS=Arabidopsis thaliana OX=3702 GN=At3g14460 PE=3 SV=1	S	Function unknown	Leucine Rich Repeat family protein, expressed [Oryza sativa Japonica Group]
BGIOSGA013750	40	29	72	84	398	198	0.867468	0.619222	1.61637	1.95914	7.85619	4.4473	0.000428927	1.85009	up	[T]	Signal transduction mechanisms	Molecular Function: protein kinase activity (GO:0004672);; Molecular Function: ATP binding (GO:0005524);; Cellular Component: integral component of membrane (GO:0016021);;	K13430|2.6e-43|bdi:100844145|K13430 serine/threonine-protein kinase PBS1 [EC:2.7.11.1] | (RefSeq) serine/threonine-protein kinase PBL27	Plant-pathogen interaction (ko04626)	[T]	Signal transduction mechanisms	Protein tyrosine and serine/threonine kinase	LEAF RUST 10 DISEASE-RESISTANCE LOCUS RECEPTOR-LIKE PROTEIN KINASE-like 1.5 OS=Arabidopsis thaliana OX=3702 GN=LRK10L-1.5 PE=3 SV=1	T	Signal transduction mechanisms	hypothetical protein OsI_13937 [Oryza sativa Indica Group]
BGIOSGA015542	145	168	106	21	4	15	1.82634	2.07555	1.35238	0.267615	0.037698	0.18428	4.78334e-08	-2.44307	down	--	--	--	--	--	--	--	--	--	--	--	hypothetical protein OsI_14954 [Oryza sativa Indica Group]
BGIOSGA000195	7	5	10	48	50	63	0.170903	0.115783	0.235691	1.25334	1.10001	1.59527	5.09304e-07	2.34962	up	[R]	General function prediction only	Cellular Component: integral component of membrane (GO:0016021);;	K10532|5.2e-229|osa:4326815|K10532 heparan-alpha-glucosaminide N-acetyltransferase [EC:2.3.1.78] | (RefSeq) heparan-alpha-glucosaminide N-acetyltransferase isoform X1	Glycosaminoglycan degradation (ko00531)	[S]	Function unknown	Protein of unknown function (DUF1624)	--	S	Function unknown	heparan-alpha-glucosaminide N-acetyltransferase isoform X1 [Oryza sativa Japonica Group]
Oryza_sativa_newGene_1165	0	0	0	263	220	301	0	0	0	6.54839	4.64135	7.45969	7.42289e-50	6.12478	up	--	--	--	--	--	--	--	--	--	--	--	hypothetical protein EE612_002330 [Oryza sativa]
BGIOSGA003145	88	77	73	14	12	10	4.27519	3.70345	3.64361	0.7068	0.48736	0.471237	1.48112e-06	-2.01965	down	--	--	--	--	--	--	--	--	--	S	Function unknown	hypothetical protein OsI_01179 [Oryza sativa Indica Group]
BGIOSGA029530	212	166	133	75	49	73	6.23665	4.79429	3.99978	2.3411	1.28759	2.19311	0.00607101	-1.01039	down	[M]	Cell wall/membrane/envelope biogenesis	Molecular Function: catalytic activity (GO:0003824);;	K09753|9.9e-64|cqi:110684970|K09753 cinnamoyl-CoA reductase [EC:1.2.1.44] | (RefSeq) cinnamoyl-CoA reductase 1-like	Phenylpropanoid biosynthesis (ko00940)	[V]	Defense mechanisms	NAD dependent epimerase/dehydratase family	Cinnamoyl-CoA reductase 1 OS=Oryza sativa subsp. japonica OX=39947 GN=CCR1 PE=1 SV=1	M	Cell wall/membrane/envelope biogenesis	hypothetical protein OsI_31867 [Oryza sativa Indica Group]
BGIOSGA008723	2787	1761	1490	900	428	516	20.7683	12.8589	11.3044	7.08748	2.85095	3.90623	5.48557e-05	-1.33396	down	[KL]	Transcription;; Replication, recombination and repair	Molecular Function: ATP binding (GO:0005524);;	K10875|0.0e+00|osa:107277028|K10875 DNA repair and recombination protein RAD54 and RAD54-like protein [EC:3.6.4.-] | (RefSeq) SNF2 domain-containing protein CLASSY 3-like	Homologous recombination (ko03440)	[L]	Replication, recombination and repair	SNF2 family N-terminal domain	SNF2 domain-containing protein CLASSY 3 OS=Arabidopsis thaliana OX=3702 GN=CLSY3 PE=1 SV=1	L	Replication, recombination and repair	hypothetical protein OsI_08293 [Oryza sativa Indica Group]
BGIOSGA001516	141	182	191	0	0	0	2.27035	2.87828	3.1292	0	0	0	6.06625e-30	-5.06094	down	[R]	General function prediction only	Biological Process: defense response (GO:0006952);; Molecular Function: ADP binding (GO:0043531);;	K15078|2.3e-82|tcc:18614561|K15078 structure-specific endonuclease subunit SLX1 [EC:3.6.1.-] | (RefSeq) putative disease resistance protein RGA3	--	[T]	Signal transduction mechanisms	NB-ARC domain	Putative disease resistance RPP13-like protein 1 OS=Arabidopsis thaliana OX=3702 GN=RPPL1 PE=3 SV=1	S	Function unknown	hypothetical protein OsI_02210 [Oryza sativa Indica Group]
BGIOSGA038478	0	0	0	37	81	44	0	0	0	1.43036	2.68255	1.664	2.82921e-11	3.44047	up	[M]	Cell wall/membrane/envelope biogenesis	--	--	--	--	--	--	Protein CDI OS=Arabidopsis thaliana OX=3702 GN=CDI PE=2 SV=1	S	Function unknown	protein CDI [Oryza sativa Japonica Group]
Oryza_sativa_newGene_239	215	189	178	35	32	76	3.80054	3.13832	3.17057	0.617126	0.409643	1.26189	0.000180303	-1.51498	down	--	--	Molecular Function: protein kinase activity (GO:0004672);; Molecular Function: ATP binding (GO:0005524);;	K02218|8.7e-30|sbi:8069780|K02218 casein kinase 1 [EC:2.7.11.1] | (RefSeq) uncharacterized protein LOC8069780	--	[L]	Replication, recombination and repair	DDE superfamily endonuclease	--	L	Replication, recombination and repair	putative nuclease HARBI1 isoform X1 [Oryza sativa Japonica Group]
BGIOSGA028140	322	398	447	179	114	133	5.53198	6.69393	7.81769	3.24579	1.74525	2.32497	2.76456e-05	-1.12875	down	--	--	Molecular Function: protein binding (GO:0005515);;	--	--	--	--	F-box domain	MEIOTIC F-BOX protein MOF OS=Oryza sativa subsp. japonica OX=39947 GN=MOF PE=1 SV=2	S	Function unknown	hypothetical protein OsI_28146 [Oryza sativa Indica Group]
Oryza_sativa_newGene_3015	2066	2472	3026	5555	129846	61908	76.3578	89.542	113.898	217.092	4292.62	2328.09	0.00188076	1.85568	up	--	--	Cellular Component: cellular_component (GO:0005575);; Cellular Component: intracellular (GO:0005622);; Cellular Component: cell (GO:0005623);; Cellular Component: cytoplasm (GO:0005737);; Cellular Component: cytoplasmic vesicle (GO:0031410);; Cellular Component: vesicle (GO:0031982);; Cellular Component: aleurone grain (GO:0033095);; Cellular Component: organelle (GO:0043226);; Cellular Component…	--	--	--	--	Cys-rich Gliadin N-terminal	Prolamin PPROL 14E OS=Oryza sativa subsp. indica OX=39946 PE=3 SV=1	S	Function unknown	prolamin [Oryza sativa Japonica Group]
BGIOSGA003395	24	28	15	29	561	95	0.666974	0.755578	0.432781	0.842388	14.2429	2.72137	0.000698679	1.98342	up	--	--	Molecular Function: peroxidase activity (GO:0004601);; Cellular Component: extracellular region (GO:0005576);; Biological Process: response to oxidative stress (GO:0006979);; Molecular Function: heme binding (GO:0020037);; Biological Process: hydrogen peroxide catabolic process (GO:0042744);; Molecular Function: metal ion binding (GO:0046872);;	K00430|3.4e-200|dosa:Os01t0326000-01|K00430 peroxidase [EC:1.11.1.7] | (RefSeq) Os01g0326000; Similar to Peroxidase (Fragment).	Phenylpropanoid biosynthesis (ko00940)	--	--	Peroxidase	Peroxidase 1 OS=Zea mays OX=4577 GN=PER1 PE=1 SV=1	P	Inorganic ion transport and metabolism	hypothetical protein OsI_01672 [Oryza sativa Indica Group]
BGIOSGA037109	19	12	12	39	156	49	0.365839	0.219487	0.21985	0.785563	2.6824	0.955294	0.000883288	1.8554	up	--	--	--	--	--	--	--	--	BTB/POZ domain-containing protein At2g13690 OS=Arabidopsis thaliana OX=3702 GN=PRL1-IFG PE=2 SV=2	S	Function unknown	hypothetical protein OsI_37717 [Oryza sativa Indica Group]
BGIOSGA003941	75	48	37	1	0	0	4.95304	3.13623	2.47725	0.070706	0	0	4.23108e-09	-3.08349	down	--	--	--	K00854|4.4e-08|dosa:Os12t0633000-01|K00854 xylulokinase [EC:2.7.1.17] | (RefSeq) Os12g0633000; Xylulose kinase.	Pentose and glucuronate interconversions (ko00040)	--	--	--	--	--	--	hypothetical protein OsI_02759 [Oryza sativa Indica Group]
Oryza_sativa_newGene_575	23	16	32	111	59	68	0.430295	0.298984	0.625425	2.26597	1.17227	1.32829	0.000418013	1.61176	up	--	--	Molecular Function: molecular_function (GO:0003674);; Molecular Function: catalytic activity (GO:0003824);; Molecular Function: ubiquitin-protein transferase activity (GO:0004842);; Molecular Function: binding (GO:0005488);; Cellular Component: cellular_component (GO:0005575);; Cellular Component: intracellular (GO:0005622);; Cellular Component: cell (GO:0005623);; Cellular Component: cytoplasm (…	--	--	--	--	--	--	J	Translation, ribosomal structure and biogenesis	OSJNBa0033H08.14 [Oryza sativa Japonica Group]
BGIOSGA024580	61	71	57	0	3	0	1.89816	2.16796	1.80482	0	0.059894	0	1.49677e-09	-3.09112	down	--	--	--	--	--	--	--	--	Putative F-box/LRR-repeat protein At3g28410 OS=Arabidopsis thaliana OX=3702 GN=At3g28410 PE=4 SV=2	--	--	hypothetical protein OsI_25423 [Oryza sativa Indica Group]
BGIOSGA020390	73	74	49	119	3151	1202	2.3225	2.30313	1.56536	4.00295	90.0804	39.0893	0.00475311	1.70993	up	[G]	Carbohydrate transport and metabolism	Biological Process: carbohydrate metabolic process (GO:0005975);; Molecular Function: carbohydrate binding (GO:0030246);; Molecular Function: glucose-6-phosphate 1-epimerase activity (GO:0047938);;	K01792|1.1e-186|osa:4339654|K01792 glucose-6-phosphate 1-epimerase [EC:5.1.3.15] | (RefSeq) putative glucose-6-phosphate 1-epimerase	Glycolysis / Gluconeogenesis (ko00010)	[G]	Carbohydrate transport and metabolism	Aldose 1-epimerase	Putative glucose-6-phosphate 1-epimerase OS=Cenchrus ciliaris OX=35872 PE=2 SV=1	G	Carbohydrate transport and metabolism	putative glucose-6-phosphate 1-epimerase [Oryza sativa Japonica Group]
BGIOSGA005435	36	60	60	34	584	298	1.20786	1.97016	2.0519	1.182	17.5571	10.1741	0.00236601	1.77427	up	[T]	Signal transduction mechanisms	--	K01076|2.9e-168|osa:4331009|K01076 abhydrolase domain-containing protein 17 [EC:3.1.2.22] | (RefSeq) alpha/beta hydrolase domain-containing protein 17B	--	[R]	General function prediction only	Serine aminopeptidase, S33	--	S	Function unknown	alpha/beta hydrolase domain-containing protein 17B [Oryza sativa Japonica Group]
BGIOSGA034451	125	80	83	0	0	1	2.71208	1.69529	1.82051	0	0	0.015608	4.63028e-17	-4.01676	down	--	--	--	K15078|7.5e-14|tcc:18614561|K15078 structure-specific endonuclease subunit SLX1 [EC:3.6.1.-] | (RefSeq) putative disease resistance protein RGA3	--	--	--	--	--	S	Function unknown	hypothetical protein OsI_35219 [Oryza sativa Indica Group]
BGIOSGA016212	232	168	177	0	0	0	7.73455	5.49867	6.00237	0	0	0	4.5865e-32	-5.20006	down	--	--	--	K10268|1.3e-155|dosa:Os04t0371600-01|K10268 F-box and leucine-rich repeat protein 2/20 | (RefSeq) Os04g0371600; Leucine-rich repeat, cysteine-containing containing protein.	--	--	--	--	--	S	Function unknown	hypothetical protein OsI_15550 [Oryza sativa Indica Group]
BGIOSGA011804	226	205	223	483	372	341	16.4677	14.6274	16.6005	37.2772	24.3107	25.3303	1.73213e-06	1.08114	up	--	--	--	--	--	--	--	DDE_Tnp_1-like zinc-ribbon	--	S	Function unknown	hypothetical protein OsI_09916 [Oryza sativa Indica Group]
BGIOSGA019863	101	79	65	132	199	155	2.81531	2.14774	1.84832	3.89866	4.97008	4.39288	0.00345644	1.12698	up	[I]	Lipid transport and metabolism	Molecular Function: hydrolase activity (GO:0016787);;	K14493|2.3e-34|smo:SELMODRAFT_450797|K14493 gibberellin receptor GID1 [EC:3.-.-.-] | (RefSeq) GID1b-1; hypothetical protein	Plant hormone signal transduction (ko04075)	[V]	Defense mechanisms	alpha/beta hydrolase fold	Probable carboxylesterase 15 OS=Arabidopsis thaliana OX=3702 GN=CXE15 PE=2 SV=1	I	Lipid transport and metabolism	hypothetical protein OsI_19949 [Oryza sativa Indica Group]
BGIOSGA002875	22	34	59	119	159	141	0.445834	0.665763	1.21837	2.55214	2.87689	2.90862	3.46185e-05	1.7714	up	--	--	Molecular Function: UDP-glycosyltransferase activity (GO:0008194);;	K22771|1.3e-285|dosa:Os01t0176000-01|K22771 flavonol-3-O-L-rhamnoside-7-O-glucosyltransferase [EC:2.4.1.-] | (RefSeq) Os01g0176000; UDP-glucuronosyl/UDP-glucosyltransferase family protein.	Flavone and flavonol biosynthesis (ko00944)	[GC]	Carbohydrate transport and metabolism;; Energy production and conversion	UDP-glucoronosyl and UDP-glucosyl transferase	UDP-glycosyltransferase 73C6 OS=Arabidopsis thaliana OX=3702 GN=UGT73C6 PE=2 SV=1	S	Function unknown	hypothetical protein OsI_00615 [Oryza sativa Indica Group]
BGIOSGA000206	36	39	51	86	2557	866	0.947934	0.992001	1.37486	2.41282	60.8492	23.4414	0.00501787	1.69463	up	--	--	Molecular Function: protein dimerization activity (GO:0046983);;	K16190|2.8e-14|bdi:100843665|K16190 glucuronokinase [EC:2.7.1.43] | (RefSeq) transcription factor TDR	Pentose and glucuronate interconversions (ko00040);; Ascorbate and aldarate metabolism (ko00053);; Amino sugar and nucleotide sugar metabolism (ko00520)	--	--	Helix-loop-helix DNA-binding domain	Transcription factor ICE1 OS=Arabidopsis thaliana OX=3702 GN=SCRM PE=1 SV=1	K	Transcription	ABIVP1 transcription factor, partial [Oryza sativa Japonica Group]
BGIOSGA008560	3052	2697	2631	1158	752	820	31.9534	27.6675	28.0456	12.8064	7.03514	8.72541	2.58586e-13	-1.32285	down	--	--	--	K11137|0.0e+00|dosa:Os02t0598800-00|K11137 telomere length regulation protein | (RefSeq) Os02g0598800; Telomere length regulation protein, conserved domain domain containing protein.	--	--	--	Telomere length regulation protein	Probable protein phosphatase 2C 19 OS=Oryza sativa subsp. japonica OX=39947 GN=Os02g0599700 PE=3 SV=2	S	Function unknown	hypothetical protein OsI_07941 [Oryza sativa Indica Group]
BGIOSGA033373	3707	3554	4281	6669	55509	27207	70.4275	66.1684	82.8278	133.97	943.262	525.896	0.000292117	2.03301	up	[T]	Signal transduction mechanisms	Molecular Function: calcium ion binding (GO:0005509);; Molecular Function: ATP binding (GO:0005524);; Molecular Function: calcium-dependent protein kinase activity (GO:0010857);;	K13412|4.9e-312|dosa:Os10t0539600-01|K13412 calcium-dependent protein kinase [EC:2.7.11.1] | (RefSeq) Os10g0539600, SPK, SEED-SPECIFIC_PROTEIN_KINASE; Similar to Calcium-dependent protein kinase 3.	Plant-pathogen interaction (ko04626)	[T]	Signal transduction mechanisms	Protein kinase domain	Calcium-dependent protein kinase 23 OS=Oryza sativa subsp. japonica OX=39947 GN=CPK23 PE=1 SV=2	T	Signal transduction mechanisms	hypothetical protein OsI_34493 [Oryza sativa Indica Group]
BGIOSGA040262	440	373	344	31	8	24	24.0213	19.9722	19.119	1.78198	0.371474	1.28696	6.93883e-24	-3.43304	down	--	--	Molecular Function: protein binding (GO:0005515);;	K10268|2.0e-95|dosa:Os04t0370500-00|K10268 F-box and leucine-rich repeat protein 2/20 | (RefSeq) Os04g0370500; Similar to OSIGBa0107E14.10 protein.	--	--	--	F-box domain	--	S	Function unknown	hypothetical protein DAI22_04g095600 [Oryza sativa Japonica Group]
BGIOSGA033477	240	270	344	137	99	93	26.1745	28.8492	38.2632	15.7831	9.61813	10.2707	0.000739484	-1.03702	down	--	--	Cellular Component: integral component of membrane (GO:0016021);;	--	--	--	--	--	--	--	--	hypothetical protein OsI_34720 [Oryza sativa Indica Group]
BGIOSGA001280	100	83	117	16	18	13	0.839743	0.68473	1.00114	0.142634	0.131462	0.104766	6.68247e-07	-2.00903	down	--	--	Cellular Component: integral component of membrane (GO:0016021);;	K13466|1.5e-34|fve:101315391|K13466 EIX receptor 1/2 | (RefSeq) probable LRR receptor-like serine/threonine-protein kinase At1g34110	Plant-pathogen interaction (ko04626)	[R]	General function prediction only	Leucine rich repeat	--	S	Function unknown	hypothetical protein OsI_02720 [Oryza sativa Indica Group]
BGIOSGA013348	167	156	119	162	1109	725	5.35928	4.9047	3.88486	5.49092	31.882	23.7226	0.00021354	1.86144	up	[F]	Nucleotide transport and metabolism	Biological Process: glutamine metabolic process (GO:0006541);;	K22314|1.4e-157|dosa:Os03t0685300-01|K22314 glucosinolate gamma-glutamyl hydrolase [EC:3.4.19.16] | (RefSeq) Os03g0685300; Glutamine amidotransferase class-I domain containing protein.	--	[F]	Nucleotide transport and metabolism	Glutamine amidotransferase class-I	Gamma-glutamyl peptidase 3 OS=Arabidopsis thaliana OX=3702 GN=GGP3 PE=1 SV=1	F	Nucleotide transport and metabolism	hypothetical protein OsI_13061 [Oryza sativa Indica Group]
Oryza_sativa_newGene_2485	6	2	13	54	47	51	0.286386	0.066039	0.701159	3.23086	2.39966	2.91541	0.000101456	2.07648	up	--	--	--	--	--	--	--	--	--	--	--	uncharacterized protein LOC4336514 isoform X2 [Oryza sativa Japonica Group]
BGIOSGA008813	169	169	155	183	562	397	3.49485	3.4163	3.26406	3.99349	10.4103	8.37823	0.00420128	1.27587	up	--	--	Biological Process: signal transduction (GO:0007165);;	K20642|8.8e-98|gmx:100776004|K20642 Rho GTPase-activating protein 22/24/25 | (RefSeq) rho GTPase-activating protein 5	--	[T]	Signal transduction mechanisms	RhoGAP domain	Rho GTPase-activating protein 3 OS=Arabidopsis thaliana OX=3702 GN=ROPGAP3 PE=2 SV=1	S	Function unknown	hypothetical protein OsI_08470 [Oryza sativa Indica Group]
BGIOSGA027032	82	74	59	7	7	26	2.3079	2.04895	1.70067	0.185127	0.154739	0.741246	0.00670261	-1.52226	down	[Q]	Secondary metabolites biosynthesis, transport and catabolism	Molecular Function: oxidoreductase activity (GO:0016491);; Molecular Function: metal ion binding (GO:0046872);;	K13229|1.1e-86|sita:101778204|K13229 2,4-dihydroxy-1,4-benzoxazin-3-one-glucoside dioxygenase [EC:1.14.11.59] | (RefSeq) DIBOA-glucoside dioxygenase BX6	Benzoxazinoid biosynthesis (ko00402)	[QR]	Secondary metabolites biosynthesis, transport and catabolism;; General function prediction only	2OG-Fe(II) oxygenase superfamily	DIBOA-glucoside dioxygenase BX6 OS=Zea mays OX=4577 GN=BX6 PE=1 SV=1	S	Function unknown	hypothetical protein OsI_29114 [Oryza sativa Indica Group]
BGIOSGA001517	84	69	84	0	0	0	3.7583	3.00171	3.83026	0	0	0	2.97102e-16	-3.97572	down	--	--	--	--	--	--	--	--	--	--	--	hypothetical protein OsI_02209 [Oryza sativa Indica Group]
BGIOSGA009078	86	52	81	98	551	206	2.7012	1.58279	2.59218	3.23508	15.5069	6.57744	0.0020868	1.65405	up	[J]	Translation, ribosomal structure and biogenesis	Molecular Function: RNA binding (GO:0003723);;	K12741|1.2e-18|smo:SELMODRAFT_163608|K12741 heterogeneous nuclear ribonucleoprotein A1/A3 | (RefSeq) hypothetical protein	Spliceosome (ko03040)	[R]	General function prediction only	RNA recognition motif. (a.k.a. RRM, RBD, or RNP domain)	Probable RNA-binding protein ARP1 OS=Arabidopsis thaliana OX=3702 GN=ARP1 PE=2 SV=1	S	Function unknown	hypothetical protein OsI_08988 [Oryza sativa Indica Group]
BGIOSGA008848	43	66	45	73	154	133	0.648459	0.971138	0.684086	1.15711	2.07727	2.04349	0.00670779	1.25796	up	[O]	Posttranslational modification, protein turnover, chaperones	Biological Process: ubiquitin-dependent protein catabolic process (GO:0006511);; Biological Process: protein deubiquitination (GO:0016579);; Molecular Function: thiol-dependent ubiquitinyl hydrolase activity (GO:0036459);;	K11855|0.0e+00|osa:4330388|K11855 ubiquitin carboxyl-terminal hydrolase 36/42 [EC:3.4.19.12] | (RefSeq) ubiquitin carboxyl-terminal hydrolase 21 isoform X1	--	[O]	Posttranslational modification, protein turnover, chaperones	Ubiquitin carboxyl-terminal hydrolase	Ubiquitin carboxyl-terminal hydrolase 21 OS=Arabidopsis thaliana OX=3702 GN=UBP21 PE=2 SV=1	O	Posttranslational modification, protein turnover, chaperones	hypothetical protein OsI_08545 [Oryza sativa Indica Group]
BGIOSGA008323	147	178	221	0	0	0	9.90486	11.7714	15.2258	0	0	0	2.93506e-30	-5.09359	down	--	--	--	--	--	--	--	--	--	--	--	hypothetical protein OsI_07445 [Oryza sativa Indica Group]
Oryza_sativa_newGene_3426	0	0	0	684	590	516	0	0	0	15.5483	11.3215	11.2743	1.62537e-77	7.20179	up	--	--	--	--	--	--	--	--	--	--	--	hypothetical protein [Oryza sativa Japonica Group]
BGIOSGA026919	162	198	191	283	608	445	7.54993	9.04636	9.06865	13.92	25.3224	21.0743	0.000120436	1.39672	up	[O]	Posttranslational modification, protein turnover, chaperones	Cellular Component: membrane (GO:0016020);;	--	--	[R]	General function prediction only	MIR domain	Stromal cell-derived factor 2-like protein OS=Arabidopsis thaliana OX=3702 GN=SDF2 PE=1 SV=1	O	Posttranslational modification, protein turnover, chaperones	stromal cell-derived factor 2-like protein [Oryza sativa Japonica Group]
BGIOSGA011551	342	360	335	0	0	0	9.11318	9.40753	9.08359	0	0	0	1.58526e-50	-6.11331	down	--	--	--	--	--	--	--	--	--	--	--	hypothetical protein OsI_09787 [Oryza sativa Indica Group]
Oryza_sativa_newGene_2352	26	31	53	72	146	95	0.622983	0.883604	1.48717	2.09883	3.72902	2.93141	0.00351046	1.43074	up	--	--	--	--	--	--	--	--	--	--	--	hypothetical protein LOC_Os10g23240 [Oryza sativa Japonica Group]
BGIOSGA008847	79	105	103	261	181	187	4.00597	5.21789	5.31752	14.0544	8.24677	9.71273	6.69248e-06	1.29028	up	--	--	--	--	--	--	--	--	--	S	Function unknown	hypothetical protein OsI_08543 [Oryza sativa Indica Group]
BGIOSGA026169	12	6	17	28	97	102	0.306379	0.140799	0.463263	0.793608	2.39909	2.86137	0.000330647	1.9665	up	[G]	Carbohydrate transport and metabolism	Molecular Function: trehalose-phosphatase activity (GO:0004805);; Biological Process: trehalose biosynthetic process (GO:0005992);;	K01087|4.9e-210|dosa:Os07t0624600-01|K01087 trehalose 6-phosphate phosphatase [EC:3.1.3.12] | (RefSeq) Os07g0624600, TREHALOSE-6-PHOSPHATE_PHOSHPHATASE_3, TPP3; Similar to Trehalose-6-phosphate phosphatase.	Starch and sucrose metabolism (ko00500)	[G]	Carbohydrate transport and metabolism	Trehalose-phosphatase	Probable trehalose-phosphate phosphatase 3 OS=Oryza sativa subsp. japonica OX=39947 GN=TPP3 PE=2 SV=1	G	Carbohydrate transport and metabolism	hypothetical protein OsI_26925 [Oryza sativa Indica Group]
BGIOSGA005864	438	398	311	55	42	86	6.12192	5.45001	4.42191	0.813998	0.515008	1.21336	1.61352e-12	-2.16466	down	--	--	--	K22262|1.8e-83|qsu:112034235|K22262 WD repeat and FYVE domain-containing protein 3 | (RefSeq) protein SPIRRIG	--	[R]	General function prediction only	PPR repeat family	Pentatricopeptide repeat-containing protein At1g11290, chloroplastic OS=Arabidopsis thaliana OX=3702 GN=PCMP-H40 PE=2 SV=1	S	Function unknown	hypothetical protein OsI_08419 [Oryza sativa Indica Group]
BGIOSGA028614	650	637	612	191	172	257	45.8275	44.0131	43.9586	14.2231	10.8492	18.4095	1.53256e-09	-1.29692	down	--	--	Biological Process: intracellular protein transport (GO:0006886);; Cellular Component: membrane (GO:0016020);;	K12403|1.2e-76|dosa:Os08t0395300-01|K12403 AP-4 complex subunit sigma-1 | (RefSeq) Os08g0395300; Similar to AP-4 complex subunit sigma-1.	--	[U]	Intracellular trafficking, secretion, and vesicular transport	Clathrin adaptor complex small chain	AP-4 complex subunit sigma OS=Arabidopsis thaliana OX=3702 GN=At2g19790 PE=1 SV=1	U	Intracellular trafficking, secretion, and vesicular transport	PREDICTED: AP-4 complex subunit sigma [Oryza brachyantha]
BGIOSGA007101	165	163	245	66	61	63	2.27783	2.21479	3.45893	0.965796	0.748117	0.884326	0.000354697	-1.20667	down	--	--	Molecular Function: protein binding (GO:0005515);;	K13420|3.9e-09|ccaj:109813206|K13420 LRR receptor-like serine/threonine-protein kinase FLS2 [EC:2.7.11.1] | (RefSeq) LRR receptor-like serine/threonine-protein kinase FLS2	MAPK signaling pathway - plant (ko04016);; Plant-pathogen interaction (ko04626)	--	--	Leucine rich repeat	Phytosulfokine receptor 1 OS=Arabidopsis thaliana OX=3702 GN=PSKR1 PE=1 SV=4	S	Function unknown	hypothetical protein OsI_05916 [Oryza sativa Indica Group]
BGIOSGA033642	15	24	20	426	246	401	1.26653	1.9428	1.7125	38.41	18.721	34.8433	1.1967e-39	3.96886	up	[O]	Posttranslational modification, protein turnover, chaperones	Molecular Function: threonine-type endopeptidase activity (GO:0004298);; Cellular Component: cytoplasm (GO:0005737);; Cellular Component: proteasome core complex, alpha-subunit complex (GO:0019773);; Biological Process: proteolysis involved in cellular protein catabolic process (GO:0051603);;	K02729|9.3e-54|dosa:Os11t0615700-01|K02729 20S proteasome subunit alpha 5 [EC:3.4.25.1] | (RefSeq) Os11g0615700; Proteasome subunit alpha type 5 (EC 3.4.25.1) (20S proteasome alpha subunit E) (20S proteasome subunit alpha-5).	Proteasome (ko03050)	[O]	Posttranslational modification, protein turnover, chaperones	Proteasome subunit	Proteasome subunit alpha type-5 OS=Oryza sativa subsp. japonica OX=39947 GN=PAE1 PE=2 SV=1	O	Posttranslational modification, protein turnover, chaperones	hypothetical protein OsI_36818 [Oryza sativa Indica Group]
BGIOSGA008176	23	34	15	121	68	121	0.354885	0.512028	0.232175	2.00261	0.945159	1.93083	4.46655e-06	1.93972	up	--	--	Molecular Function: nucleic acid binding (GO:0003676);; Molecular Function: RNA-DNA hybrid ribonuclease activity (GO:0004523);;	K12874|1.3e-24|qsu:112031791|K12874 intron-binding protein aquarius | (RefSeq) LOW QUALITY PROTEIN: intron-binding protein aquarius-like	Spliceosome (ko03040)	[R]	General function prediction only	Reverse transcriptase-like	--	S	Function unknown	hypothetical protein OsI_07152 [Oryza sativa Indica Group]
BGIOSGA003596	492	511	410	34	6	7	19.3591	19.7254	16.4311	1.3755	0.206728	0.248252	1.84422e-18	-3.65187	down	--	--	--	--	--	--	--	--	--	--	--	hypothetical protein OsI_02089 [Oryza sativa Indica Group]
Oryza_sativa_newGene_4188	2652	2167	1613	2	0	0	10.672	8.82595	6.63935	0.00545	0	0	2.96433e-108	-8.0328	down	[M]	Cell wall/membrane/envelope biogenesis	Molecular Function: protein tyrosine kinase activity (GO:0004713);; Molecular Function: ATP binding (GO:0005524);;	K03283|1.0e-21|qsu:112017276|K03283 heat shock 70kDa protein 1/2/6/8 | (RefSeq) heat shock cognate 70 kDa protein 2-like	Spliceosome (ko03040);; Protein processing in endoplasmic reticulum (ko04141);; Endocytosis (ko04144)	--	--	Protein kinase domain	G-type lectin S-receptor-like serine/threonine-protein kinase At1g34300 OS=Arabidopsis thaliana OX=3702 GN=At1g34300 PE=1 SV=1	T	Signal transduction mechanisms	Os07g0415500 [Oryza sativa Japonica Group]
BGIOSGA003481	0	0	0	264	168	308	0	0	0	4.52812	2.43434	5.09073	1.80901e-43	5.8769	up	--	--	--	K03549|1.9e-20|jre:108997955|K03549 KUP system potassium uptake protein | (RefSeq) potassium transporter 19-like	--	--	--	Transposase-associated domain	--	--	--	hypothetical protein OsI_01836 [Oryza sativa Indica Group]
Oryza_sativa_newGene_5387	23	16	5	129	84	123	0.575537	0.373327	0.102841	3.39606	1.87068	3.12487	4.90924e-08	2.45546	up	--	--	Molecular Function: transferase activity, transferring acyl groups other than amino-acyl groups (GO:0016747);;	K19861|1.6e-23|dosa:Os07t0244200-01|K19861 benzyl alcohol O-benzoyltransferase [EC:2.3.1.196 2.3.1.232] | (RefSeq) Os07g0244200; Transferase family protein.	--	--	--	Transferase family	13-hydroxylupanine O-tigloyltransferase OS=Lupinus albus OX=3870 GN=HMT/HLT PE=1 SV=1	S	Function unknown	benzyl alcohol O-benzoyltransferase [Oryza sativa Japonica Group]
BGIOSGA028181	68	60	99	204	443	132	7.39711	6.35344	10.9539	23.5541	43.2623	14.611	0.000620975	1.64305	up	--	--	--	--	--	--	--	Cysteine-rich TM module stress tolerance	--	--	--	hypothetical protein OsI_28219 [Oryza sativa Indica Group]
BGIOSGA027498	3114	3777	3705	389	707	451	111.468	132.455	135.026	14.7012	22.6244	16.3941	5.83039e-17	-2.29217	down	--	--	--	--	--	--	--	Protein of unknown function (DUF3778)	--	--	--	hypothetical protein OsI_28138 [Oryza sativa Indica Group]
BGIOSGA012912	239	159	167	37	57	73	19.739	12.8041	13.9945	3.22063	4.15044	6.08409	0.00155323	-1.28644	down	--	--	--	--	--	--	--	--	--	--	--	hypothetical protein OsI_12124 [Oryza sativa Indica Group]
BGIOSGA032767	18	76	67	144	171	266	1.06918	4.60311	4.19386	9.41008	9.47457	16.7265	0.000879144	1.64162	up	--	--	Molecular Function: protein binding (GO:0005515);;	--	--	--	--	PLAT/LH2 domain	--	S	Function unknown	putative elicitor inducible protein [Oryza sativa Japonica Group]
BGIOSGA016017	0	0	0	675	414	673	0	0	0	17.2079	8.93844	16.5304	6.75231e-73	7.08418	up	--	--	Cellular Component: integral component of membrane (GO:0016021);;	K07466|4.4e-106|osa:4348221|K07466 replication factor A1 | (RefSeq) replication protein A 70 kDa DNA-binding subunit B	DNA replication (ko03030);; Nucleotide excision repair (ko03420);; Mismatch repair (ko03430);; Homologous recombination (ko03440)	--	--	Protein of unknown function (DUF679)	Protein DMP5 OS=Arabidopsis thaliana OX=3702 GN=DMP5 PE=2 SV=1	S	Function unknown	hypothetical protein OsI_15113 [Oryza sativa Indica Group]
BGIOSGA032323	0	0	0	208	122	145	0	0	0	17.1936	8.50109	11.5137	1.25109e-33	5.32267	up	--	--	--	--	--	--	--	--	--	--	--	hypothetical protein OsI_32667 [Oryza sativa Indica Group]
BGIOSGA034827	341	325	290	48	51	38	19.6867	18.3694	17.0552	2.90266	2.62829	2.19088	3.13983e-19	-2.35238	down	--	--	Molecular Function: transcription factor activity, sequence-specific DNA binding (GO:0003700);;	--	--	--	--	bZIP transcription factor	--	S	Function unknown	hypothetical protein OsI_35163 [Oryza sativa Indica Group]
BGIOSGA028145	9	10	21	96	154	128	0.167697	0.172806	0.395814	1.88007	2.57109	2.42806	3.04454e-11	2.79402	up	--	--	--	--	--	--	--	--	Putative F-box protein At5g38390 OS=Arabidopsis thaliana OX=3702 GN=At5g38390 PE=4 SV=1	S	Function unknown	hypothetical protein OsI_28151 [Oryza sativa Indica Group]
Oryza_sativa_newGene_6624	1053	1109	815	251	311	222	9.02005	8.16785	6.64982	2.01605	1.98951	1.74446	3.46111e-10	-1.55112	down	--	--	--	--	--	--	--	--	--	--	--	expressed protein [Oryza sativa Japonica Group]
BGIOSGA025331	246	164	142	30	64	64	4.80086	3.14048	2.82239	0.619766	1.11509	1.25452	0.00572613	-1.26539	down	[T]	Signal transduction mechanisms	Molecular Function: protein serine/threonine kinase activity (GO:0004674);; Molecular Function: ATP binding (GO:0005524);;	K07198|7.4e-103|sita:101765046|K07198 5'-AMP-activated protein kinase, catalytic alpha subunit [EC:2.7.11.11] | (RefSeq) LOW QUALITY PROTEIN: serine/threonine protein kinase OSK1-like	--	[T]	Signal transduction mechanisms	Protein kinase domain	Serine/threonine protein kinase OSK4 OS=Oryza sativa subsp. indica OX=39946 GN=OSK4 PE=3 SV=1	T	Signal transduction mechanisms	hypothetical protein OsI_25240 [Oryza sativa Indica Group]
BGIOSGA005333	1005	952	686	387	258	259	10.9337	10.1444	7.59571	4.44241	2.51066	2.85838	1.12864e-06	-1.22144	down	--	--	Molecular Function: molecular_function (GO:0003674);; Molecular Function: nucleic acid binding (GO:0003676);; Molecular Function: RNA binding (GO:0003723);; Molecular Function: catalytic activity (GO:0003824);; Molecular Function: nuclease activity (GO:0004518);; Molecular Function: endonuclease activity (GO:0004519);; Molecular Function: binding (GO:0005488);; Cellular Component: cellular_compon…	K17710|2.2e-33|bdi:100843166|K17710 pentatricopeptide repeat domain-containing protein 1 | (RefSeq) pentatricopeptide repeat-containing protein At5g14770, mitochondrial	--	--	--	PPR repeat family	--	S	Function unknown	Os02g0824000 [Oryza sativa Japonica Group]
Oryza_sativa_newGene_6502	22	38	38	65	568	772	0.309089	0.493335	0.345521	0.772113	5.66016	7.44914	1.3718e-07	2.69791	up	--	--	--	--	--	--	--	--	--	--	--	Os10g0143400 [Oryza sativa Japonica Group]
BGIOSGA026841	319	205	202	40	78	46	6.14919	3.87214	3.96161	0.803709	1.33949	0.900002	0.000107768	-1.57892	down	[C]	Energy production and conversion	Molecular Function: oxidoreductase activity (GO:0016491);; Molecular Function: molybdenum ion binding (GO:0030151);; Molecular Function: molybdopterin cofactor binding (GO:0043546);;	K10534|1.1e-308|dosa:Os08t0468100-01|K10534 nitrate reductase (NAD(P)H) [EC:1.7.1.1 1.7.1.2 1.7.1.3] | (RefSeq) Os08g0468100; Similar to Nitrate reductase.	Nitrogen metabolism (ko00910)	[C]	Energy production and conversion	Oxidoreductase molybdopterin binding domain	Nitrate reductase [NADH] 1 OS=Oryza sativa subsp. japonica OX=39947 GN=NIA1 PE=2 SV=3	S	Function unknown	hypothetical protein OsI_29539 [Oryza sativa Indica Group]
BGIOSGA011158	1326	1107	759	343	312	397	22.9909	18.8024	13.3952	6.28304	4.83127	6.99734	1.21517e-06	-1.25944	down	[E]	Amino acid transport and metabolism	Biological Process: oligopeptide transport (GO:0006857);; Cellular Component: integral component of membrane (GO:0016021);; Molecular Function: transmembrane transporter activity (GO:0022857);;	K14638|0.0e+00|obr:102718247|K14638 solute carrier family 15 (peptide/histidine transporter), member 3/4 | (RefSeq) protein NRT1/ PTR FAMILY 8.3-like	--	[E]	Amino acid transport and metabolism	POT family	Protein NRT1/ PTR FAMILY 8.3 OS=Arabidopsis thaliana OX=3702 GN=NPF8.3 PE=1 SV=1	E	Amino acid transport and metabolism	hypothetical protein OsI_10666 [Oryza sativa Indica Group]
Oryza_sativa_newGene_2092	35	25	20	68	79	61	1.37336	0.971779	0.814107	2.89434	2.81027	2.46095	0.00231596	1.37345	up	--	--	--	--	--	--	--	--	--	--	--	Os04g0113350 [Oryza sativa Japonica Group]
BGIOSGA001638	60	45	47	249	158	218	1.85288	1.3602	1.48671	8.19501	4.38919	6.88639	1.88629e-13	2.10202	up	--	--	--	--	--	--	--	--	--	S	Function unknown	hypothetical protein OsI_01938 [Oryza sativa Indica Group]
BGIOSGA015909	148	120	82	5	9	9	2.87816	2.29684	1.62567	0.1021	0.139867	0.159102	3.84712e-11	-2.83651	down	--	--	Molecular Function: nucleic acid binding (GO:0003676);; Molecular Function: RNA-DNA hybrid ribonuclease activity (GO:0004523);;	--	--	--	--	Reverse transcriptase-like	--	S	Function unknown	hypothetical protein OsI_14878 [Oryza sativa Indica Group]
Oryza_sativa_newGene_7457	0	0	0	5563	5229	4799	0	0	0	65.9745	55.6822	56.9121	5.59777e-192	9.99363	up	--	--	--	--	--	--	--	--	--	--	--	Os03g0561415, partial [Oryza sativa Japonica Group]
BGIOSGA026594	368	691	483	206	137	158	8.8901	16.3864	11.8851	5.2576	2.95442	3.88223	4.74802e-05	-1.25609	down	[I]	Lipid transport and metabolism	Biological Process: defense response to insect (GO:0002213);; Biological Process: lipid catabolic process (GO:0016042);; Molecular Function: lipase activity (GO:0016298);;	K01052|9.8e-239|dosa:Os08t0529800-01|K01052 lysosomal acid lipase/cholesteryl ester hydrolase [EC:3.1.1.13] | (RefSeq) Os08g0529800; Alpha/beta hydrolase fold-1 domain containing protein.	Steroid biosynthesis (ko00100)	[I]	Lipid transport and metabolism	Partial alpha/beta-hydrolase lipase region	Triacylglycerol lipase 2 OS=Arabidopsis thaliana OX=3702 GN=LIP2 PE=2 SV=1	S	Function unknown	hypothetical protein OsI_30006 [Oryza sativa Indica Group]
BGIOSGA015225	395	657	827	2413	1355	1911	15.1459	24.669	32.2929	97.827	46.4568	74.5543	9.29355e-09	1.69138	up	--	--	Molecular Function: DNA binding (GO:0003677);;	K09522|1.4e-129|osa:9268633|K09522 DnaJ homolog subfamily C member 2 | (RefSeq) dnaJ homolog subfamily C member 2	--	[O]	Posttranslational modification, protein turnover, chaperones	Myb-like DNA-binding domain	Transcription factor MAMYB OS=Arabidopsis thaliana OX=3702 GN=MAMYB PE=1 SV=1	K	Transcription	hypothetical protein OsI_15583 [Oryza sativa Indica Group]
BGIOSGA038437	1221	1687	1973	13427	21703	12300	139.438	188.777	229.439	1621.3	2216.9	1429.23	4.24805e-31	3.26647	up	--	--	--	--	--	--	--	Family of unknown function (DUF5637)	--	S	Function unknown	unknown, partial [Oryza sativa Indica Group]
BGIOSGA005759	27	20	16	44	496	195	1.49182	1.07566	0.901724	2.55275	24.6287	10.992	7.02025e-06	2.41039	up	--	--	Cellular Component: integral component of membrane (GO:0016021);;	--	--	--	--	--	--	S	Function unknown	hypothetical protein OsI_08646 [Oryza sativa Indica Group]
Oryza_sativa_newGene_5371	6859	6086	4279	2155	2082	2440	41.6271	35.7831	27.3855	14.1616	12.1399	15.7807	1.53411e-06	-1.05566	down	--	--	Cellular Component: integral component of membrane (GO:0016021);;	--	--	--	--	--	--	--	--	hypothetical protein EE612_048728 [Oryza sativa]
BGIOSGA003197	24	11	28	99	304	74	1.0044	0.433692	1.22597	4.49874	11.6806	3.20639	2.45966e-05	2.20465	up	--	--	Cellular Component: integral component of membrane (GO:0016021);;	--	--	[S]	Function unknown	TLC domain	--	U	Intracellular trafficking, secretion, and vesicular transport	hypothetical protein OsI_01272 [Oryza sativa Indica Group]
BGIOSGA017783	5048	6173	6345	19115	312972	80705	274.41	328.805	351.224	1098.56	15215.7	4463.17	0.00029774	2.10657	up	--	--	Molecular Function: serine-type endopeptidase inhibitor activity (GO:0004867);; Molecular Function: IgE binding (GO:0019863);;	--	--	--	--	High molecular weight glutenin subunit	19 kDa globulin OS=Oryza sativa subsp. japonica OX=39947 GN=Os05g0499100 PE=1 SV=2	S	Function unknown	19 kDa globulin [Oryza sativa Japonica Group]
BGIOSGA025566	140	93	52	0	0	0	8.12853	5.26061	3.0508	0	0	0	2.24063e-14	-3.81567	down	--	--	--	--	--	--	--	--	--	--	--	hypothetical protein OsI_25749 [Oryza sativa Indica Group]
BGIOSGA003474	10	8	14	364	97	204	0.192197	0.133457	0.25941	7.44701	1.66403	4.01097	1.22707e-16	3.52375	up	[QV]	Secondary metabolites biosynthesis, transport and catabolism;; Defense mechanisms	Molecular Function: monooxygenase activity (GO:0004497);; Molecular Function: iron ion binding (GO:0005506);; Molecular Function: oxidoreductase activity, acting on paired donors, with incorporation or reduction of molecular oxygen (GO:0016705);; Molecular Function: heme binding (GO:0020037);;	K24184|2.6e-289|osa:107277903|K24184 cytochrome P450 family 89 subfamily A [EC:1.14.-.-] | (RefSeq) cytochrome P450 89A2-like	--	[Q]	Secondary metabolites biosynthesis, transport and catabolism	Cytochrome P450	Cytochrome P450 89A2 OS=Arabidopsis thaliana OX=3702 GN=CYP89A2 PE=2 SV=2	Q	Secondary metabolites biosynthesis, transport and catabolism	hypothetical protein OsI_01826 [Oryza sativa Indica Group]
BGIOSGA000116	406	278	266	30	80	120	10.2266	6.8613	6.83115	0.799164	1.79201	3.07612	0.00331648	-1.41656	down	--	--	Molecular Function: pattern binding (GO:0001871);; Biological Process: defense response to nematode (GO:0002215);; Biological Process: immune system process (GO:0002376);; Molecular Function: molecular_function (GO:0003674);; Molecular Function: catalytic activity (GO:0003824);; Molecular Function: hydrolase activity, hydrolyzing O-glycosyl compounds (GO:0004553);; Molecular Function: binding (GO…	K13457|5.0e-06|fve:101290932|K13457 disease resistance protein RPM1 | (RefSeq) disease resistance protein RPM1-like	Plant-pathogen interaction (ko04626)	--	--	--	--	--	--	hypothetical protein OsI_05184 [Oryza sativa Indica Group]
BGIOSGA017627	59	51	72	79	731	395	2.16126	1.822	2.66537	3.05666	23.9815	14.712	5.96351e-05	2.10582	up	--	--	--	--	--	--	--	Protein of unknown function (DUF1618)	--	--	--	hypothetical protein OsI_20866 [Oryza sativa Indica Group]
BGIOSGA035994	36	41	51	333	192	209	2.80934	3.11141	4.02456	27.4488	13.4094	16.6167	4.25788e-16	2.49431	up	--	--	--	--	--	--	--	--	--	--	--	hypothetical protein OsI_38758 [Oryza sativa Indica Group]
BGIOSGA029008	817	833	879	848	2481	1804	9.94294	9.93447	10.8871	10.9036	27.0102	22.3352	0.00459729	1.15574	up	--	--	--	K18469|0.0e+00|dosa:Os08t0518100-01|K18469 TBC1 domain family member 5 | (RefSeq) Os08g0518100; RabGAP/TBC domain containing protein.	--	[U]	Intracellular trafficking, secretion, and vesicular transport	Rab-GTPase-TBC domain	--	S	Function unknown	hypothetical protein OsI_29896 [Oryza sativa Indica Group]
BGIOSGA002779	0	0	0	389	421	539	0	0	0	7.38691	6.75876	9.86084	1.13691e-64	6.77159	up	--	--	--	K14820|8.2e-15|obr:102712420|K14820 ribosome biogenesis protein BRX1 | (RefSeq) ribosome biogenesis protein BRX1-like	--	[J]	Translation, ribosomal structure and biogenesis	--	--	J	Translation, ribosomal structure and biogenesis	hypothetical protein OsI_00397 [Oryza sativa Indica Group]
BGIOSGA001268	81	80	53	0	0	0	1.57649	1.52774	1.05279	0	0	0	5.25628e-14	-3.7451	down	--	--	Cellular Component: integral component of membrane (GO:0016021);;	K13466|6.2e-25|fve:101315391|K13466 EIX receptor 1/2 | (RefSeq) probable LRR receptor-like serine/threonine-protein kinase At1g34110	Plant-pathogen interaction (ko04626)	--	--	Leucine rich repeat	--	S	Function unknown	hypothetical protein EE612_003909, partial [Oryza sativa]
BGIOSGA036774	0	2	0	36	103	55	0	0.059675	0	1.39482	3.3695	2.0406	5.24387e-10	3.23565	up	--	--	Cellular Component: ubiquitin ligase complex (GO:0000151);; Molecular Function: molecular_function (GO:0003674);; Molecular Function: binding (GO:0005488);; Molecular Function: protein binding (GO:0005515);; Cellular Component: cellular_component (GO:0005575);; Cellular Component: intracellular (GO:0005622);; Cellular Component: cell (GO:0005623);; Cellular Component: cytoplasm (GO:0005737);; Bio…	K10523|8.3e-154|dosa:Os11t0111900-01|K10523 speckle-type POZ protein | (RefSeq) Os11g0111900; BTB domain containing protein.	--	[DR]	Cell cycle control, cell division, chromosome partitioning;; General function prediction only	BTB/POZ domain	BTB/POZ domain-containing protein At3g56230 OS=Arabidopsis thaliana OX=3702 GN=At3g56230 PE=2 SV=1	S	Function unknown	BTB/POZ domain-containing protein At3g56230 [Oryza sativa Japonica Group]
Oryza_sativa_newGene_4241	743	1215	1076	229	98	292	2.65875	4.25932	3.92087	0.884488	0.313716	1.0627	2.79071e-07	-1.81178	down	--	--	--	--	--	--	--	--	--	--	--	hypothetical protein DAI22_07g254401 [Oryza sativa Japonica Group]
Oryza_sativa_newGene_426	481	367	386	4	0	0	9.43415	7.05536	7.69409	0.082991	0	0	1.08499e-50	-5.81905	down	--	--	--	--	--	--	--	--	--	--	--	hypothetical protein EE612_010371 [Oryza sativa]
BGIOSGA025135	100	80	94	147	196	161	2.69362	2.10687	2.56605	4.16725	4.709	4.40429	0.00179082	1.05598	up	[R]	General function prediction only	Molecular Function: oxidoreductase activity (GO:0016491);;	K05275|2.8e-67|ota:OT_ostta10g00690|K05275 pyridoxine 4-dehydrogenase [EC:1.1.1.65] | (RefSeq) NADP-dependent oxidoreductase domain	Vitamin B6 metabolism (ko00750)	[C]	Energy production and conversion	Aldo/keto reductase family	Uncharacterized oxidoreductase At1g06690, chloroplastic OS=Arabidopsis thaliana OX=3702 GN=At1g06690 PE=1 SV=1	C	Energy production and conversion	uncharacterized oxidoreductase At1g06690, chloroplastic [Oryza sativa Japonica Group]
BGIOSGA024491	1266	1451	1575	230	127	154	27.3753	30.7343	34.6827	5.24505	2.43822	3.38773	2.92051e-35	-2.68342	down	--	--	Molecular Function: Rab GDP-dissociation inhibitor activity (GO:0005093);; Biological Process: small GTPase mediated signal transduction (GO:0007264);; Biological Process: protein transport (GO:0015031);;	K17255|4.9e-255|dosa:Os07t0271000-01|K17255 Rab GDP dissociation inhibitor | (RefSeq) Os07g0271000; Similar to GDP dissociation inhibitor protein OsGDI1.	--	[O]	Posttranslational modification, protein turnover, chaperones	GDP dissociation inhibitor	Guanosine nucleotide diphosphate dissociation inhibitor 2 OS=Arabidopsis thaliana OX=3702 GN=GDI2 PE=2 SV=1	O	Posttranslational modification, protein turnover, chaperones	hypothetical protein OsI_25604 [Oryza sativa Indica Group]
BGIOSGA036373	96	69	57	16	7	6	3.43083	2.39831	2.04578	0.579471	0.221702	0.215208	4.8374e-05	-1.99864	down	--	--	Cellular Component: nucleus (GO:0005634);;	K11446|1.4e-23|mus:103998506|K11446 [histone H3]-trimethyl-L-lysine4 demethylase [EC:1.14.11.67] | (RefSeq) lysine-specific demethylase 5B	--	[R]	General function prediction only	jmjN domain	Lysine-specific demethylase JMJ705 OS=Oryza sativa subsp. japonica OX=39947 GN=JMJ705 PE=1 SV=1	S	Function unknown	hypothetical protein OsI_37985 [Oryza sativa Indica Group]
BGIOSGA006325	0	0	0	198	164	222	0	0	0	11.5421	8.08539	12.4607	1.95413e-41	5.72335	up	--	--	Molecular Function: ATP binding (GO:0005524);; Cellular Component: integral component of membrane (GO:0016021);; Molecular Function: ATPase activity (GO:0016887);;	K08341|2.0e-39|osa:4349525|K08341 GABA(A) receptor-associated protein | (RefSeq) autophagy-related protein 8D isoform X2	Autophagy - other (ko04136)	[Z]	Cytoskeleton	Autophagy protein Atg8 ubiquitin like	Autophagy-related protein 8D OS=Oryza sativa subsp. japonica OX=39947 GN=ATG8D PE=3 SV=2	U	Intracellular trafficking, secretion, and vesicular transport	autophagy-related protein 8D isoform X2 [Oryza sativa Japonica Group]
BGIOSGA024333	235	206	153	26	53	78	7.54284	6.46384	5.00002	0.880241	1.50755	2.52738	0.00333293	-1.35327	down	[I]	Lipid transport and metabolism	Biological Process: catabolic process (GO:0009056);; Molecular Function: hydrolase activity (GO:0016787);;	K20506|4.2e-77|egu:105060863|K20506 tuliposide A-converting enzyme [EC:4.2.99.22] | (RefSeq) tuliposide A-converting enzyme 2, chloroplastic-like	--	[V]	Defense mechanisms	alpha/beta hydrolase fold	Tuliposide A-converting enzyme b1, amyloplastic OS=Tulipa gesneriana OX=13306 GN=TCEA-B1 PE=1 SV=1	I	Lipid transport and metabolism	tuliposide A-converting enzyme b1, amyloplastic [Oryza sativa Japonica Group]
BGIOSGA010541	1113	972	724	443	262	240	35.9138	30.7345	23.7784	15.1134	7.55283	7.8743	3.7967e-05	-1.22302	down	--	--	--	--	--	--	--	--	--	--	--	hypothetical protein OsI_12020 [Oryza sativa Indica Group]
BGIOSGA001396	220	292	310	0	0	0	20.8422	27.1287	29.9563	0	0	0	1.21243e-40	-5.68343	down	--	--	--	--	--	[S]	Function unknown	Eukaryotic protein of unknown function (DUF866)	--	S	Function unknown	hypothetical protein OsI_02466 [Oryza sativa Indica Group]
BGIOSGA003933	219	164	231	58	27	69	2.28065	1.67382	2.45655	0.63608	0.246048	0.724587	8.92455e-05	-1.52143	down	--	--	Cellular Component: integral component of membrane (GO:0016021);;	K13466|1.2e-74|cic:CICLE_v10007014mg|K13466 EIX receptor 1/2 | (RefSeq) hypothetical protein	Plant-pathogen interaction (ko04626)	--	--	Leucine rich repeat	Receptor-like protein EIX2 OS=Solanum lycopersicum OX=4081 GN=EIX2 PE=1 SV=2	S	Function unknown	hypothetical protein OsI_02750 [Oryza sativa Indica Group]
BGIOSGA029120	39	29	70	278	151	158	2.60226	1.8851	4.74968	19.613	8.98766	10.7086	1.37596e-06	1.95568	up	--	--	--	--	--	--	--	--	--	--	--	hypothetical protein OsI_30154 [Oryza sativa Indica Group]
BGIOSGA008889	355	288	197	100	96	110	36.009	28.6854	20.3839	10.7395	8.72465	11.3112	0.00111583	-1.08825	down	--	--	Molecular Function: DNA binding (GO:0003677);; Cellular Component: nucleus (GO:0005634);;	K15397|1.9e-12|cpep:111776416|K15397 3-ketoacyl-CoA synthase [EC:2.3.1.199] | (RefSeq) 3-ketoacyl-CoA synthase 17-like	Fatty acid elongation (ko00062);; Plant-pathogen interaction (ko04626)	[O]	Posttranslational modification, protein turnover, chaperones	--	Protein RADIALIS-like 3 OS=Arabidopsis thaliana OX=3702 GN=RL3 PE=2 SV=1	K	Transcription	hypothetical protein OsI_08624 [Oryza sativa Indica Group]
BGIOSGA022836	3777	3555	2361	900	1035	1188	154.173	142.214	98.141	38.8201	37.7564	49.3211	1.06679e-07	-1.29055	down	[G]	Carbohydrate transport and metabolism	Molecular Function: channel activity (GO:0015267);; Cellular Component: integral component of membrane (GO:0016021);;	K09873|7.8e-135|dosa:Os06t0336200-01|K09873 aquaporin TIP | (RefSeq) Os06g0336200, TONOPLAST_INTRINSIC_PROTEIN_2;2, TIP2;2; Delta-tonoplast intrinsic protein.	--	[G]	Carbohydrate transport and metabolism	Major intrinsic protein	Probable aquaporin TIP2-2 OS=Oryza sativa subsp. japonica OX=39947 GN=TIP2-2 PE=2 SV=1	G	Carbohydrate transport and metabolism	hypothetical protein OsI_22823 [Oryza sativa Indica Group]
BGIOSGA029272	56	68	75	320	245	363	0.681178	0.809516	0.919437	4.11347	2.66003	4.49617	5.00237e-20	2.31496	up	--	--	Cellular Component: microtubule (GO:0005874);; Molecular Function: microtubule binding (GO:0008017);;	K04564|6.4e-40|zma:103640161|K04564 superoxide dismutase, Fe-Mn family [EC:1.15.1.1] | (RefSeq) uncharacterized protein LOC103640161	Peroxisome (ko04146)	--	--	HEAT repeat	TORTIFOLIA1-like protein 2 OS=Arabidopsis thaliana OX=3702 GN=TOR1L2 PE=4 SV=1	S	Function unknown	hypothetical protein OsI_32380 [Oryza sativa Indica Group]
BGIOSGA019744	376	411	290	1058	968	900	6.86354	7.36232	5.38107	20.4392	15.8257	16.7283	2.92032e-17	1.64554	up	--	--	Molecular Function: RNA binding (GO:0003723);; Cellular Component: ribonucleoprotein complex (GO:1990904);;	K13207|2.3e-235|dosa:Os05t0373400-01|K13207 CUG-BP- and ETR3-like factor | (RefSeq) Os05g0373400; Ribonucleoprotein, BRUNO-like domain containing protein.	--	[A]	RNA processing and modification	RNA recognition motif. (a.k.a. RRM, RBD, or RNP domain)	RNA-binding protein BRN1 OS=Arabidopsis thaliana OX=3702 GN=BRN1 PE=2 SV=1	S	Function unknown	hypothetical protein OsI_19721 [Oryza sativa Indica Group]
BGIOSGA025955	99	163	173	300	216	274	1.77714	2.88019	3.1842	5.73475	3.4808	5.03923	0.00138291	1.02877	up	[C]	Energy production and conversion	Molecular Function: oxidoreductase activity (GO:0016491);;	K17871|0.0e+00|dosa:Os07t0564500-01|K17871 NADH:ubiquinone reductase (non-electrogenic) [EC:1.6.5.9] | (RefSeq) Os07g0564500; Pyridine nucleotide-disulphide oxidoreductase, NAD-binding region domain containing protein.	--	[C]	Energy production and conversion	Pyridine nucleotide-disulphide oxidoreductase	Internal alternative NAD(P)H-ubiquinone oxidoreductase A1, mitochondrial OS=Arabidopsis thaliana OX=3702 GN=NDA1 PE=2 SV=1	C	Energy production and conversion	hypothetical protein OsI_26497 [Oryza sativa Indica Group]
BGIOSGA004768	19	45	33	87	781	152	1.10731	2.65137	2.02204	5.5575	42.2534	9.32839	2.25393e-05	2.30737	up	--	--	--	--	--	--	--	C2H2-type zinc finger	Zinc finger protein ZAT11 OS=Arabidopsis thaliana OX=3702 GN=ZAT11 PE=2 SV=1	S	Function unknown	hypothetical protein OsI_04367 [Oryza sativa Indica Group]
BGIOSGA011856	201	138	269	81	78	65	4.47308	3.01955	6.11393	1.90965	1.54759	1.45777	0.00877501	-1.04	down	--	--	Molecular Function: zinc ion binding (GO:0008270);;	K10144|1.5e-184|osa:4331606|K10144 RING finger and CHY zinc finger domain-containing protein 1 [EC:2.3.2.27] | (RefSeq) E3 ubiquitin-protein ligase MIEL1 isoform X1	Ubiquitin mediated proteolysis (ko04120)	[R]	General function prediction only	Zinc-ribbon	E3 ubiquitin-protein ligase RZFP34 OS=Arabidopsis thaliana OX=3702 GN=RZPF34 PE=1 SV=1	S	Function unknown	hypothetical protein OsI_10008 [Oryza sativa Indica Group]
Oryza_sativa_newGene_5446	0	0	0	41	47	30	0	0	0	1.18018	1.20454	0.813156	5.72189e-10	3.24403	up	--	--	--	--	--	--	--	--	--	--	--	hypothetical protein OsI_28298 [Oryza sativa Indica Group]
BGIOSGA011765	1229	1514	1629	2230	7988	5124	23.0079	27.7648	31.0504	44.118	133.73	97.5828	6.62012e-06	1.80191	up	[T]	Signal transduction mechanisms	Molecular Function: protein kinase activity (GO:0004672);; Molecular Function: calcium ion binding (GO:0005509);; Molecular Function: ATP binding (GO:0005524);; Cellular Component: cytosol (GO:0005829);; Cellular Component: plasma membrane (GO:0005886);; Biological Process: response to cold (GO:0009409);;	K13412|0.0e+00|dosa:Os03t0128700-01|K13412 calcium-dependent protein kinase [EC:2.7.11.1] | (RefSeq) Os03g0128700, CALCIUM-DEPENDENT_PROTEIN_KINASE_7, CDPK7; Calcium-dependent protein kinase, isoform 11 (EC 2.7.1.-) (CDPK 11).	Plant-pathogen interaction (ko04626)	[T]	Signal transduction mechanisms	Protein kinase domain	Calcium-dependent protein kinase 7 OS=Oryza sativa subsp. japonica OX=39947 GN=CPK7 PE=2 SV=2	T	Signal transduction mechanisms	hypothetical protein OsI_09829 [Oryza sativa Indica Group]
BGIOSGA012926	143	121	144	54	41	43	8.45366	7.04746	8.66041	3.33777	2.15108	2.56505	0.000394608	-1.18725	down	--	--	Molecular Function: DNA binding (GO:0003677);;	K15601|5.9e-33|osa:4333174|K15601 [histone H3]-dimethyl-L-lysine9 demethylase [EC:1.14.11.65] | (RefSeq) lysine-specific demethylase JMJ25 isoform X1	--	--	--	--	--	--	--	hypothetical protein DAI22_03g223800 [Oryza sativa Japonica Group]
BGIOSGA019501	690	433	351	95	184	188	7.32616	4.50205	3.79528	1.06368	1.73907	2.02853	0.00438287	-1.18807	down	[M]	Cell wall/membrane/envelope biogenesis	Molecular Function: protein kinase activity (GO:0004672);; Molecular Function: ATP binding (GO:0005524);; Cellular Component: integral component of membrane (GO:0016021);;	K13418|4.3e-72|hbr:110664195|K13418 somatic embryogenesis receptor kinase 1 [EC:2.7.10.1 2.7.11.1] | (RefSeq) somatic embryogenesis receptor kinase 2-like isoform X1	--	--	--	Protein tyrosine and serine/threonine kinase	Probable LRR receptor-like serine/threonine-protein kinase At1g56140 OS=Arabidopsis thaliana OX=3702 GN=At1g56140 PE=2 SV=2	S	Function unknown	hypothetical protein OsI_19211 [Oryza sativa Indica Group]
Oryza_sativa_newGene_3110	86	86	75	1501	2211	1523	1.06742	1.04715	0.94569	19.8972	24.7949	19.4164	9.72189e-69	4.36973	up	--	--	--	--	--	--	--	--	--	--	--	hypothetical protein [Oryza sativa Indica Group]
Oryza_sativa_newGene_450	93	85	65	2	0	0	1.64687	1.22258	1.08629	0.024101	0	0	2.52679e-14	-3.69138	down	--	--	--	--	--	--	--	--	--	--	--	hypothetical protein [Oryza sativa Japonica Group]
BGIOSGA028748	136	129	96	4	5	14	9.22397	8.59936	6.66144	0.22168	0.263181	0.937918	2.4044e-10	-2.81314	down	--	--	Molecular Function: nucleic acid binding (GO:0003676);; Molecular Function: zinc ion binding (GO:0008270);;	--	--	--	--	Zinc knuckle	--	--	--	hypothetical protein OsI_29386 [Oryza sativa Indica Group]
BGIOSGA002207	350	284	206	118	114	90	6.40647	5.09336	3.84197	2.27415	1.85805	1.67146	0.00296061	-1.01679	down	--	--	Biological Process: response to hypoxia (GO:0001666);; Cellular Component: nucleus (GO:0005634);; Cellular Component: cytoplasm (GO:0005737);; Biological Process: response to heat (GO:0009408);; Biological Process: response to wounding (GO:0009611);; Biological Process: response to insect (GO:0009625);; Biological Process: induced systemic resistance (GO:0009682);; Biological Process: systemic ac…	K14508|2.2e-278|dosa:Os01t0194300-01|K14508 regulatory protein NPR1 | (RefSeq) Os01g0194300, NPR1_HOMOLOG_1, NH1; Similar to NPR1.	Plant hormone signal transduction (ko04075)	[R]	General function prediction only	NPR1/NIM1 like defence protein C terminal	BTB/POZ domain and ankyrin repeat-containing protein NPR1 OS=Oryza sativa subsp. indica OX=39946 GN=NPR1 PE=1 SV=1	S	Function unknown	hypothetical protein OsI_00749 [Oryza sativa Indica Group]
BGIOSGA025833	192	215	247	404	519	467	6.20921	6.81021	8.13921	13.7981	15.0174	15.3651	3.20115e-07	1.28759	up	--	--	Molecular Function: GTPase activity (GO:0003924);; Molecular Function: GTP binding (GO:0005525);;	K07976|9.2e-133|osa:4343414|K07976 Rab family, other | (RefSeq) septum-promoting GTP-binding protein 1	--	[R]	General function prediction only	Ras family	Ras-related protein RABG1 OS=Arabidopsis thaliana OX=3702 GN=RABG1 PE=2 SV=1	S	Function unknown	hypothetical protein OsI_26241 [Oryza sativa Indica Group]
BGIOSGA033497	687	610	334	224	190	223	33.2415	28.9089	16.4239	11.454	8.18653	10.9345	0.00305882	-1.00069	down	--	--	Molecular Function: molecular_function (GO:0003674);; Molecular Function: catalytic activity (GO:0003824);; Cellular Component: cellular_component (GO:0005575);; Cellular Component: intracellular (GO:0005622);; Cellular Component: cell (GO:0005623);; Cellular Component: cytoplasm (GO:0005737);; Cellular Component: endoplasmic reticulum (GO:0005783);; Cellular Component: endoplasmic reticulum memb…	K13082|6.6e-10|nnu:104589331|K13082 bifunctional dihydroflavonol 4-reductase/flavanone 4-reductase [EC:1.1.1.219 1.1.1.234] | (RefSeq) dihydroflavonol 4-reductase-like	Flavonoid biosynthesis (ko00941)	[V]	Defense mechanisms	NAD(P)H-binding	Cinnamoyl-CoA reductase-like SNL6 OS=Oryza sativa subsp. japonica OX=39947 GN=SNL6 PE=3 SV=1	S	Function unknown	hypothetical protein OsI_34774 [Oryza sativa Indica Group]
BGIOSGA037602	23325	21324	8288	6305	5505	7956	1162.38	1041.29	420.53	332.126	245.315	403.293	0.00696172	-1.03376	down	--	--	--	--	--	--	--	Protein of unknown function, DUF538	--	S	Function unknown	hypothetical protein OsI_38742 [Oryza sativa Indica Group]
BGIOSGA032792	251	301	203	418	836	603	14.7486	17.2971	12.1185	25.959	43.885	36.0219	4.0249e-05	1.42755	up	--	--	--	--	--	--	--	Pollen protein Ole e 1 like	Pollen-specific protein C13 OS=Zea mays OX=4577 GN=MGS1 PE=2 SV=1	S	Function unknown	pollen-specific protein C13 [Oryza sativa Japonica Group]
BGIOSGA016787	88	108	83	18	19	29	1.24788	1.50308	1.20356	0.262995	0.242262	0.413568	0.000222663	-1.53606	down	[S]	Function unknown	Cellular Component: integral component of membrane (GO:0016021);; Biological Process: transmembrane transport (GO:0055085);;	K15363|8.1e-68|bna:111210893|K15363 fanconi-associated nuclease 1 [EC:3.1.21.- 3.1.4.1] | (RefSeq) fanconi-associated nuclease 1 homolog	--	--	--	OPT oligopeptide transporter protein	Probable metal-nicotianamine transporter YSL11 OS=Oryza sativa subsp. japonica OX=39947 GN=YSL11 PE=2 SV=1	S	Function unknown	hypothetical protein OsI_16701 [Oryza sativa Indica Group]
BGIOSGA004829	100	140	191	442	4292	2005	2.60822	3.58215	5.08691	12.2353	100.547	53.4174	0.000242381	2.12564	up	--	--	Molecular Function: starch binding (GO:2001070);;	K15535|1.9e-07|cqi:110714994|K15535 phosphoglucan, water dikinase [EC:2.7.9.5] | (RefSeq) phosphoglucan, water dikinase, chloroplastic-like isoform X1	--	--	--	Starch binding domain	--	S	Function unknown	hypothetical protein OsJ_04123 [Oryza sativa Japonica Group]
BGIOSGA036209	175	127	180	22	52	22	2.27749	1.62261	2.39607	0.302918	0.597742	0.282165	0.000442315	-1.62872	down	--	--	--	--	--	--	--	--	--	--	--	hypothetical protein OsI_38299 [Oryza sativa Indica Group]
Oryza_sativa_newGene_6195	0	0	0	96	120	118	0	0	0	3.13412	3.27747	3.77837	1.49752e-26	4.86117	up	--	--	--	K13117|6.2e-09|nau:109213263|K13117 ATP-dependent RNA helicase DDX35 [EC:3.6.4.13] | (RefSeq) probable pre-mRNA-splicing factor ATP-dependent RNA helicase DEAH9	--	--	--	--	--	T	Signal transduction mechanisms	hypothetical protein OsJ_08622 [Oryza sativa Japonica Group]
BGIOSGA024593	19	35	43	57	342	81	1.24626	2.3425	3.00045	4.10691	21.1302	5.6283	0.00331468	1.70043	up	--	--	Molecular Function: serine-type endopeptidase inhibitor activity (GO:0004867);;	--	--	--	--	Protease inhibitor/seed storage/LTP family	Alpha-amylase/trypsin inhibitor OS=Hordeum vulgare OX=4513 PE=2 SV=1	--	--	limit dextrinase inhibitor [Oryza sativa Indica Group]
BGIOSGA007664	0	14	23	35	247	90	0	0.351394	0.638726	0.988903	6.03423	2.5028	0.00836592	1.6356	up	--	--	Cellular Component: integral component of membrane (GO:0016021);;	K18789|1.0e-66|cic:CICLE_v10010628mg|K18789 xylogalacturonan beta-1,3-xylosyltransferase [EC:2.4.2.41] | (RefSeq) hypothetical protein	--	[RT]	General function prediction only;; Signal transduction mechanisms	Haemolysin-III related	Heptahelical transmembrane protein ADIPOR2 OS=Oryza sativa subsp. japonica OX=39947 GN=ADIPOR2 PE=2 SV=1	S	Function unknown	heptahelical transmembrane protein ADIPOR2 [Oryza sativa Japonica Group]
BGIOSGA007948	286	191	208	29	58	44	6.11805	3.99632	4.53904	0.651796	1.09799	0.944307	2.14168e-06	-1.80871	down	--	--	Molecular Function: Rho guanyl-nucleotide exchange factor activity (GO:0005089);;	--	--	--	--	PRONE (Plant-specific Rop nucleotide exchanger)	Rho guanine nucleotide exchange factor 8 OS=Arabidopsis thaliana OX=3702 GN=ROPGEF8 PE=1 SV=1	S	Function unknown	hypothetical protein OsI_06708 [Oryza sativa Indica Group]
BGIOSGA008655	140	103	65	23	7	10	4.88622	3.51298	2.29825	0.839531	0.194784	0.355621	3.95165e-05	-2.01751	down	[R]	General function prediction only	Biological Process: cytokinin biosynthetic process (GO:0009691);; Molecular Function: hydrolase activity (GO:0016787);;	K22522|4.1e-135|dosa:Os02t0628000-00|K22522 cytokinin riboside 5'-monophosphate phosphoribohydrolase [EC:3.2.2.-] | (RefSeq) Os02g0628000; Probable cytokinin riboside 5'-monophosphate phosphoribohydrolase LOGL2.	--	--	--	Possible lysine decarboxylase	Probable cytokinin riboside 5'-monophosphate phosphoribohydrolase LOGL2 OS=Oryza sativa subsp. japonica OX=39947 GN=LOGL2 PE=3 SV=1	S	Function unknown	hypothetical protein OsI_08151 [Oryza sativa Indica Group]
BGIOSGA011983	70	124	160	299	469	284	3.37301	5.87078	7.88085	15.2935	20.2633	13.9422	4.78972e-05	1.60113	up	--	--	Molecular Function: molecular_function (GO:0003674);; Molecular Function: transcription cofactor activity (GO:0003712);; Molecular Function: transcription corepressor activity (GO:0003714);; Cellular Component: cellular_component (GO:0005575);; Cellular Component: intracellular (GO:0005622);; Cellular Component: cell (GO:0005623);; Cellular Component: nucleus (GO:0005634);; Biological Process: re…	K13464|1.1e-108|dosa:Os03t0180900-01|K13464 jasmonate ZIM domain-containing protein | (RefSeq) Os03g0180900, JAZ2, JASMONATE_ZIM-DOMAIN_PROTEIN_2; Tify domain containing protein.	Plant hormone signal transduction (ko04075)	--	--	tify domain	Protein TIFY 11c OS=Oryza sativa subsp. indica OX=39946 GN=TIFY11C PE=3 SV=1	S	Function unknown	protein TIFY 11c [Oryza sativa Japonica Group]
BGIOSGA004820	108	252	306	721	295	609	2.25282	5.16945	6.5419	16.0075	5.52809	12.9946	0.00339135	1.28691	up	--	--	Molecular Function: transferase activity, transferring acyl groups other than amino-acyl groups (GO:0016747);;	K19747|1.4e-58|cam:101495408|K19747 BAHD acyltransferase [EC:2.3.1.-] | (RefSeq) BAHD acyltransferase DCR	--	--	--	Transferase family	Uncharacterized acetyltransferase At3g50280 OS=Arabidopsis thaliana OX=3702 GN=At3g50280 PE=3 SV=1	S	Function unknown	uncharacterized acetyltransferase At3g50280 [Oryza sativa Japonica Group]
BGIOSGA030518	90	47	62	8	17	18	4.28015	2.19098	3.01935	0.356218	0.711011	0.875461	0.00768313	-1.4345	down	--	--	--	K20714|4.4e-38|dosa:Os04t0488700-01|K20714 serine/threonine-protein kinase OXI1 [EC:2.7.11.1] | (RefSeq) Os04g0488700; Similar to PHY3.	MAPK signaling pathway - plant (ko04016)	--	--	--	--	--	--	hypothetical protein OsI_30896 [Oryza sativa Indica Group]
BGIOSGA030591	60	59	76	0	0	0	6.33146	6.03729	8.17812	0	0	0	2.15064e-13	-3.6704	down	--	--	--	--	--	--	--	--	--	--	--	hypothetical protein OsI_31049 [Oryza sativa Indica Group]
BGIOSGA001181	53	76	97	52	613	324	0.842168	1.17682	1.5607	0.87213	8.70747	5.24278	0.00529928	1.61719	up	[V]	Defense mechanisms	Cellular Component: integral component of membrane (GO:0016021);; Biological Process: transmembrane transport (GO:0055085);;	--	--	--	--	Voltage-dependent anion channel	S-type anion channel SLAH3 OS=Arabidopsis thaliana OX=3702 GN=SLAH3 PE=1 SV=1	P	Inorganic ion transport and metabolism	hypothetical protein OsI_02913 [Oryza sativa Indica Group]
BGIOSGA025574	128	142	84	0	0	0	7.08802	7.68604	4.72121	0	0	0	5.8198e-21	-4.42478	down	--	--	--	--	--	--	--	--	--	--	--	hypothetical protein OsI_25769 [Oryza sativa Indica Group]
BGIOSGA019833	51	92	78	184	196	226	1.52517	2.72712	2.40272	5.89604	5.31496	6.98696	1.29166e-06	1.56184	up	[G]	Carbohydrate transport and metabolism	Molecular Function: chitinase activity (GO:0004568);; Biological Process: carbohydrate metabolic process (GO:0005975);; Biological Process: chitin catabolic process (GO:0006032);; Molecular Function: chitin binding (GO:0008061);; Biological Process: cell wall macromolecule catabolic process (GO:0016998);;	K20547|2.3e-182|dosa:Os05t0399400-00|K20547 basic endochitinase B [EC:3.2.1.14] | (RefSeq) Os05g0399400; Chitinase 9.	Amino sugar and nucleotide sugar metabolism (ko00520);; MAPK signaling pathway - plant (ko04016)	[R]	General function prediction only	Chitinase class I	Chitinase 9 OS=Oryza sativa subsp. japonica OX=39947 GN=Cht9 PE=2 SV=1	G	Carbohydrate transport and metabolism	hypothetical protein OsI_19884 [Oryza sativa Indica Group]
BGIOSGA016947	12	23	20	48	40	54	0.211424	0.395207	0.36701	0.915426	0.637584	0.977753	0.00999166	1.29413	up	[V]	Defense mechanisms	Molecular Function: antiporter activity (GO:0015297);; Cellular Component: integral component of membrane (GO:0016021);; Molecular Function: xenobiotic transporter activity (GO:0042910);;	K03327|1.1e-309|dosa:Os04t0571600-01|K03327 multidrug resistance protein, MATE family | (RefSeq) Os04g0571600; Multi antimicrobial extrusion protein MatE family protein.	--	[R]	General function prediction only	MatE	Protein DETOXIFICATION 49 OS=Arabidopsis thaliana OX=3702 GN=DTX49 PE=2 SV=1	V	Defense mechanisms	hypothetical protein OsI_17039 [Oryza sativa Indica Group]
BGIOSGA002805	361	305	224	1140	639	781	3.24015	2.68608	2.04844	10.8311	5.13192	7.13886	3.60123e-10	1.65505	up	--	--	Molecular Function: protein kinase activity (GO:0004672);; Cellular Component: integral component of membrane (GO:0016021);;	K13420|2.5e-15|dzi:111276676|K13420 LRR receptor-like serine/threonine-protein kinase FLS2 [EC:2.7.11.1] | (RefSeq) probable LRR receptor-like serine/threonine-protein kinase At3g47570	MAPK signaling pathway - plant (ko04016);; Plant-pathogen interaction (ko04626)	--	--	Leucine rich repeat	Probable LRR receptor-like serine/threonine-protein kinase At3g47570 OS=Arabidopsis thaliana OX=3702 GN=At3g47570 PE=2 SV=1	S	Function unknown	hypothetical protein OsI_00436 [Oryza sativa Indica Group]
BGIOSGA014574	301	516	621	1565	933	1032	6.43621	10.8302	13.5574	35.4821	17.8861	22.5092	5.32693e-06	1.41432	up	--	--	Molecular Function: UDP-glycosyltransferase activity (GO:0008194);;	K13495|1.1e-214|dosa:Os04t0556400-01|K13495 cis-zeatin O-glucosyltransferase [EC:2.4.1.215] | (RefSeq) Os04g0556400; Similar to UDP-glycosyltransferase UGT93B9.	Zeatin biosynthesis (ko00908)	[GC]	Carbohydrate transport and metabolism;; Energy production and conversion	UDP-glucoronosyl and UDP-glucosyl transferase	Putative cis-zeatin O-glucosyltransferase OS=Sorghum bicolor OX=4558 GN=SB20O07.14 PE=3 SV=1	S	Function unknown	hypothetical protein OsI_16939 [Oryza sativa Indica Group]
BGIOSGA034872	95	51	70	0	0	0	2.01675	1.06511	1.52382	0	0	0	2.76019e-13	-3.66975	down	--	--	--	K15078|2.5e-17|tcc:18614561|K15078 structure-specific endonuclease subunit SLX1 [EC:3.6.1.-] | (RefSeq) putative disease resistance protein RGA3	--	--	--	NB-ARC domain	--	S	Function unknown	hypothetical protein OsI_35243 [Oryza sativa Indica Group]
BGIOSGA032471	304	239	236	66	110	118	4.10057	3.15882	3.23979	0.936966	1.32719	1.6156	0.00757353	-1.00937	down	--	--	Molecular Function: ADP binding (GO:0043531);;	K15078|6.4e-47|tcc:18614561|K15078 structure-specific endonuclease subunit SLX1 [EC:3.6.1.-] | (RefSeq) putative disease resistance protein RGA3	--	[T]	Signal transduction mechanisms	NB-ARC domain	Putative disease resistance protein RGA3 OS=Solanum bulbocastanum OX=147425 GN=RGA3 PE=2 SV=2	S	Function unknown	hypothetical protein OsI_32622 [Oryza sativa Indica Group]
Oryza_sativa_newGene_6945	99	250	234	557	464	500	3.8384	9.49356	9.23613	22.8551	16.0943	19.7395	3.4877e-05	1.46634	up	--	--	--	--	--	--	--	--	--	--	--	hypothetical protein EE612_053470 [Oryza sativa]
BGIOSGA013650	12	24	40	69	141	62	0.126794	0.245955	0.436401	0.7804	1.34964	0.673922	0.0050067	1.53917	up	--	--	--	--	--	--	--	DUF761-associated sequence motif	--	S	Function unknown	hypothetical protein OsI_13715 [Oryza sativa Indica Group]
BGIOSGA006426	198	201	113	9	50	36	7.48301	7.40709	4.33952	0.334805	1.68175	1.34577	0.0052072	-1.52899	down	--	--	--	--	--	--	--	--	--	--	--	hypothetical protein OsI_07311 [Oryza sativa Indica Group]
BGIOSGA019492	30	41	37	0	2	0	0.546992	0.723569	0.678031	0	0.032661	0	1.14586e-05	-2.44654	down	[T]	Signal transduction mechanisms	Molecular Function: protein kinase activity (GO:0004672);; Molecular Function: ATP binding (GO:0005524);; Cellular Component: integral component of membrane (GO:0016021);;	K13418|1.6e-68|hbr:110664195|K13418 somatic embryogenesis receptor kinase 1 [EC:2.7.10.1 2.7.11.1] | (RefSeq) somatic embryogenesis receptor kinase 2-like isoform X1	--	--	--	Protein tyrosine and serine/threonine kinase	Probable LRR receptor-like serine/threonine-protein kinase At1g56130 OS=Arabidopsis thaliana OX=3702 GN=At1g56130 PE=2 SV=2	T	Signal transduction mechanisms	hypothetical protein OsI_19195 [Oryza sativa Indica Group]
BGIOSGA009392	4	4	8	32	43	36	0.170662	0.157355	0.348488	1.52345	1.72763	1.67671	8.15576e-05	2.07815	up	--	--	Molecular Function: DNA binding (GO:0003677);; Molecular Function: transcription factor activity, sequence-specific DNA binding (GO:0003700);; Cellular Component: nucleus (GO:0005634);;	K14516|1.3e-101|dosa:Os03t0860100-01|K14516 ethylene-responsive transcription factor 1 | (RefSeq) Os03g0860100, ETHYLENE_RESPONSE_FACTOR_83, ERF83; Similar to Ethylene-responsive transcription factor 2 (Ethylene-responsive element binding factor 2) (EREBP-2) (AtERF2).	MAPK signaling pathway - plant (ko04016);; Plant hormone signal transduction (ko04075)	--	--	AP2 domain	Ethylene-responsive transcription factor 1B OS=Arabidopsis thaliana OX=3702 GN=ERF1B PE=1 SV=2	K	Transcription	ethylene-responsive transcription factor 15 [Oryza sativa Japonica Group]
BGIOSGA016236	1027	954	882	0	0	0	49.4499	45.0366	43.2464	0	0	0	5.5261e-86	-7.42477	down	--	--	--	--	--	--	--	--	--	--	--	hypothetical protein OsI_15601 [Oryza sativa Indica Group]
BGIOSGA007810	228	211	208	53	69	80	2.90145	2.63605	2.69526	0.713337	0.779472	1.03486	3.01359e-05	-1.29322	down	--		Molecular Function: protein serine/threonine kinase activity (GO:0004674);; Molecular Function: ATP binding (GO:0005524);; Cellular Component: integral component of membrane (GO:0016021);;	K00924|1.6e-133|pda:103710231|K00924 kinase [EC:2.7.1.-] | (RefSeq) receptor-like protein kinase 5	--	--	--	Protein tyrosine and serine/threonine kinase	Leucine-rich repeat receptor-like serine/threonine-protein kinase BAM1 OS=Arabidopsis thaliana OX=3702 GN=BAM1 PE=1 SV=1	T	Signal transduction mechanisms	hypothetical protein OsI_06413 [Oryza sativa Indica Group]
BGIOSGA018179	860	667	752	223	187	163	143.186	108.9	127.51	39.2356	27.728	27.542	8.08871e-15	-1.65323	down	--	--	--	--	--	--	--	--	--	--	--	unknown protein [Oryza sativa Japonica Group]
BGIOSGA010115	93	146	113	402	247	346	4.72188	7.26268	5.83894	21.6822	11.2469	17.9483	2.88602e-09	1.62725	up	--	--	--	--	--	[G]	Carbohydrate transport and metabolism	Glyoxalase/Bleomycin resistance protein/Dioxygenase superfamily	--	E	Amino acid transport and metabolism	hypothetical protein OsI_12872 [Oryza sativa Indica Group]
Oryza_sativa_newGene_7002	374	364	280	23	76	50	3.10375	2.94946	2.36713	0.196397	0.638143	0.420141	1.04371e-06	-2.03671	down	--	--	--	--	--	--	--	--	--	--	--	retrotransposon protein, putative, Ty3-gypsy sub-class [Oryza sativa Japonica Group]
BGIOSGA031636	2715	2898	2903	3248	9011	5180	30.5591	31.9688	33.2709	38.6465	90.7152	59.3167	0.00249121	1.18214	up	--	--	Biological Process: chloroplast organization (GO:0009658);; Cellular Component: chloroplast envelope (GO:0009941);; Biological Process: protein import into chloroplast stroma (GO:0045037);;	--	--	--	--	Chloroplast envelope transporter	Protein TIC110, chloroplastic OS=Arabidopsis thaliana OX=3702 GN=TIC110 PE=1 SV=1	S	Function unknown	hypothetical protein OsI_34142 [Oryza sativa Indica Group]
BGIOSGA003355	116	116	88	321	254	279	10.5341	10.325	8.20392	31.0019	20.7913	25.9655	1.06751e-11	1.58914	up	--	--	--	--	--	--	--	--	--	--	--	hypothetical protein OsI_01586 [Oryza sativa Indica Group]
BGIOSGA014403	33	39	74	72	259	130	1.22097	1.40546	2.77453	2.81421	8.56942	4.89478	0.00757622	1.45217	up	--	--	Molecular Function: hydrolase activity, hydrolyzing O-glycosyl compounds (GO:0004553);; Cellular Component: cell wall (GO:0005618);; Biological Process: xyloglucan metabolic process (GO:0010411);; Molecular Function: xyloglucan:xyloglucosyl transferase activity (GO:0016762);; Biological Process: cell wall biogenesis (GO:0042546);; Cellular Component: apoplast (GO:0048046);; Biological Process: ce…	K14504|2.9e-159|dosa:Os04t0604300-01|K14504 xyloglucan:xyloglucosyl transferase TCH4 [EC:2.4.1.207] | (RefSeq) Os04g0604300; Similar to Xyloglucan endotransglucosylase/hydrolase protein 24 precursor (EC 2.4.1.207) (At-XTH24) (XTH-24) (Meristem protein 5) (MERI-5 protein) (MERI5 protein) (Endo-xyloglucan transferase) (Xyloglucan endo-1,4-beta-D-glucanase).	Plant hormone signal transduction (ko04075)	--	--	Glycosyl hydrolases family 16	Probable xyloglucan endotransglucosylase/hydrolase protein 25 OS=Arabidopsis thaliana OX=3702 GN=XTH25 PE=2 SV=2	G	Carbohydrate transport and metabolism	hypothetical protein OsI_17282 [Oryza sativa Indica Group]
BGIOSGA034642	0	0	0	387	272	372	0	0	0	19.6658	11.7018	18.2137	1.69947e-58	6.4914	up	--	--	--	--	--	--	--	--	--	S	Function unknown	hypothetical protein LOC_Os11g01690 [Oryza sativa Japonica Group]
BGIOSGA035945	34	65	103	6	5	2	0.927148	1.77435	2.91782	0.166821	0.116405	0.035081	1.04183e-05	-2.33876	down	--	--	Molecular Function: nucleic acid binding (GO:0003676);;	--	--	--	--	C2H2-type zinc finger	--	S	Function unknown	hypothetical protein OsI_38873 [Oryza sativa Indica Group]
BGIOSGA040670	4333	3702	2944	1661	1055	1384	116.532	97.5556	80.6049	47.2219	25.3534	37.8508	1.42899e-07	-1.12285	down	--	--	Molecular Function: phosphatidylinositol transporter activity (GO:0008526);;	K19996|1.1e-10|egr:104427922|K19996 phosphatidylinositol transfer protein SFH5 | (RefSeq) patellin-4	--	[I]	Lipid transport and metabolism	CRAL/TRIO domain	--	S	Function unknown	phosphatidylinositol transfer protein 3 [Oryza sativa Japonica Group]
Oryza_sativa_newGene_4523	423	331	292	144	116	75	7.22333	5.5334	5.08294	2.59681	1.76229	1.30042	0.000225969	-1.24895	down	--	--	--	--	--	[R]	General function prediction only	zinc-binding in reverse transcriptase	--	--	--	OSJNBa0029L02.10 [Oryza sativa Japonica Group]
BGIOSGA010459	240	212	160	44	84	72	2.97127	2.57475	2.011	0.571269	0.925124	0.897771	0.00507632	-1.15418	down	--	--	Molecular Function: zinc ion binding (GO:0008270);;	K22262|7.2e-121|qsu:112034235|K22262 WD repeat and FYVE domain-containing protein 3 | (RefSeq) protein SPIRRIG	--	[R]	General function prediction only	PPR repeat	Putative pentatricopeptide repeat-containing protein At5g13230, mitochondrial OS=Arabidopsis thaliana OX=3702 GN=PCMP-H89 PE=3 SV=1	S	Function unknown	hypothetical protein OsI_12205 [Oryza sativa Indica Group]
BGIOSGA034867	1	1	2	120	144	145	0.008679	0.020113	0.035349	2.60792	2.65462	3.03313	2.29658e-29	4.76469	up	--	--	Molecular Function: ADP binding (GO:0043531);;	K15078|7.6e-17|tcc:18614561|K15078 structure-specific endonuclease subunit SLX1 [EC:3.6.1.-] | (RefSeq) putative disease resistance protein RGA3	--	--	--	NB-ARC domain	--	S	Function unknown	hypothetical protein OsI_35231 [Oryza sativa Indica Group]
BGIOSGA011714	275	244	195	249	1565	852	7.85198	6.81156	5.65698	7.49258	39.9629	24.74	0.000684734	1.69774	up	[I]	Lipid transport and metabolism	--	--	--	--	--	Alpha/beta hydrolase family	--	S	Function unknown	hypothetical protein OsI_09735 [Oryza sativa Indica Group]
Oryza_sativa_newGene_6259	268	202	169	18	55	24	6.58539	4.66274	4.4927	0.460694	1.21747	0.599743	3.40897e-05	-1.90524	down	--	--	--	--	--	--	--	--	--	--	--	Os09g0310800 [Oryza sativa Japonica Group]
BGIOSGA018998	4143	4472	4944	7233	9223	6957	53.7202	56.8168	65.2783	99.148	106.944	91.7567	2.77975e-06	1.02449	up	[V]	Defense mechanisms	Cellular Component: nucleus (GO:0005634);; Molecular Function: metal ion binding (GO:0046872);;	K10638|0.0e+00|dosa:Os05t0102600-01|K10638 E3 ubiquitin-protein ligase UHRF1 [EC:2.3.2.27] | (RefSeq) Os05g0102600; Zinc finger, RING/FYVE/PHD-type domain containing protein.	--	--	--	SAD/SRA domain	E3 ubiquitin-protein ligase ORTHRUS 2 OS=Arabidopsis thaliana OX=3702 GN=ORTH2 PE=1 SV=1	V	Defense mechanisms	hypothetical protein OsI_18087 [Oryza sativa Indica Group]
BGIOSGA002853	27	53	83	304	120	187	1.0022	1.92672	3.15683	12.0519	4.00629	7.11829	0.000169129	1.72085	up	--	--	Biological Process: defense response (GO:0006952);; Biological Process: negative regulation of translation (GO:0017148);; Molecular Function: rRNA N-glycosylase activity (GO:0030598);; Molecular Function: toxin activity (GO:0090729);;	K10523|3.5e-64|sita:101752949|K10523 speckle-type POZ protein | (RefSeq) protein synthesis inhibitor II	--	--	--	Ribosome inactivating protein	Protein synthesis inhibitor II OS=Hordeum vulgare OX=4513 GN=RIP30A PE=1 SV=1	S	Function unknown	hypothetical protein OsI_00549 [Oryza sativa Indica Group]
BGIOSGA035808	38	44	32	51	1284	661	2.70772	3.077	2.29009	3.82415	82.1928	48.0871	0.00612015	1.67542	up	--	--	Cellular Component: integral component of membrane (GO:0016021);;	--	--	--	--	--	--	S	Function unknown	expressed protein [Oryza sativa Japonica Group]
Oryza_sativa_newGene_6421	915	910	705	180	251	314	26.5002	25.779	20.7721	5.48144	6.53988	9.20388	8.02441e-07	-1.38508	down	--	--	--	--	--	--	--	--	--	--	--	hypothetical protein EE612_007909 [Oryza sativa]
BGIOSGA010973	2892	2909	3242	6	0	6	32.4867	32.012	37.084	0.067783	0	0.068335	1.92202e-162	-8.05469	down	--	--	Biological Process: protein transport (GO:0015031);;	--	--	--	--	--	--	S	Function unknown	hypothetical protein OsI_11046 [Oryza sativa Indica Group]
BGIOSGA004018	360	324	339	445	1689	714	4.48111	3.9486	4.30109	5.85893	18.8377	9.05715	0.00139572	1.47072	up	[MDT]	Cell wall/membrane/envelope biogenesis;; Cell cycle control, cell division, chromosome partitioning;; Signal transduction mechanisms	Molecular Function: ATP binding (GO:0005524);;	K03231|2.3e-111|mtr:MTR_1g101870|K03231 elongation factor 1-alpha | (RefSeq) elongation factor 1-alpha	RNA transport (ko03013)	[O]	Posttranslational modification, protein turnover, chaperones	ATPase family associated with various cellular activities (AAA)	ATPase family AAA domain-containing protein FIGL1 OS=Arabidopsis thaliana OX=3702 GN=FIGL1 PE=2 SV=2	O	Posttranslational modification, protein turnover, chaperones	hypothetical protein OsI_02914 [Oryza sativa Indica Group]
BGIOSGA015562	39	57	40	148	181	134	1.46083	2.09377	1.5144	5.88399	6.06549	5.09839	1.06329e-07	1.81766	up	--	--	Biological Process: response to reactive oxygen species (GO:0000302);; Biological Process: response to acid chemical (GO:0001101);; Cellular Component: cellular_component (GO:0005575);; Cellular Component: intracellular (GO:0005622);; Cellular Component: cell (GO:0005623);; Cellular Component: nucleus (GO:0005634);; Cellular Component: cytoplasm (GO:0005737);; Cellular Component: plasma membrane …	--	--	--	--	PAP_fibrillin	Plastid-lipid-associated protein 6, chloroplastic OS=Arabidopsis thaliana OX=3702 GN=PAP6 PE=1 SV=1	S	Function unknown	hypothetical protein OsI_14918 [Oryza sativa Indica Group]
BGIOSGA009100	20	2	13	33	224	58	0.344365	0.024805	0.227115	0.601187	3.50436	1.01624	0.00246046	1.81901	up	--	--	Molecular Function: galactoside 2-alpha-L-fucosyltransferase activity (GO:0008107);; Cellular Component: integral component of membrane (GO:0016021);; Cellular Component: Golgi cisterna membrane (GO:0032580);; Biological Process: cell wall biogenesis (GO:0042546);; Biological Process: cell wall organization (GO:0071555);;	K13681|0.0e+00|osa:4330824|K13681 xyloglucan fucosyltransferase [EC:2.4.1.-] | (RefSeq) probable fucosyltransferase 8 isoform X1	--	--	--	Xyloglucan fucosyltransferase	Galactoside 2-alpha-L-fucosyltransferase OS=Arabidopsis thaliana OX=3702 GN=FUT1 PE=1 SV=2	S	Function unknown	hypothetical protein OsI_09045 [Oryza sativa Indica Group]
BGIOSGA036327	865	1210	1158	209	145	174	29.796	40.8298	40.6069	7.60453	4.45603	6.08976	1.3063e-27	-2.25441	down	[E]	Amino acid transport and metabolism	Molecular Function: glycine hydroxymethyltransferase activity (GO:0004372);; Biological Process: glycine metabolic process (GO:0006544);; Biological Process: L-serine catabolic process (GO:0006565);; Biological Process: one-carbon metabolic process (GO:0006730);; Molecular Function: methyltransferase activity (GO:0008168);; Molecular Function: zinc ion binding (GO:0008270);; Molecular Function: a…	K00600|8.0e-171|dosa:Os12t0409000-01|K00600 glycine hydroxymethyltransferase [EC:2.1.2.1] | (RefSeq) Os12g0409000; Similar to Serine hydroxymethyltransferase.	Glycine, serine and threonine metabolism (ko00260);; Cyanoamino acid metabolism (ko00460);; Glyoxylate and dicarboxylate metabolism (ko00630);; One carbon pool by folate (ko00670);; Carbon metabolism (ko01200);; Biosynthesis of amino acids (ko01230)	[E]	Amino acid transport and metabolism	Serine hydroxymethyltransferase	Serine hydroxymethyltransferase 4 OS=Arabidopsis thaliana OX=3702 GN=SHM4 PE=1 SV=1	E	Amino acid transport and metabolism	serine hydroxymethyltransferase 4 [Oryza sativa Japonica Group]
BGIOSGA014540	79	88	69	104	313	173	2.32765	2.55834	2.07101	3.27505	8.32498	5.21711	0.00583533	1.32458	up	--	--	Molecular Function: molecular_function (GO:0003674);; Molecular Function: transcription factor activity, sequence-specific DNA binding (GO:0003700);; Biological Process: regulation of transcription, DNA-templated (GO:0006355);; Biological Process: biological_process (GO:0008150);; Biological Process: regulation of biosynthetic process (GO:0009889);; Biological Process: regulation of gene expressi…	K23460|2.9e-39|cam:101497150|K23460 Rab proteins geranylgeranyltransferase component A | (RefSeq) uncharacterized LOC101497150	--	--	--	RWP-RK domain	Protein RKD5 OS=Arabidopsis thaliana OX=3702 GN=RKD5 PE=3 SV=1	K	Transcription	hypothetical protein OsI_16995 [Oryza sativa Indica Group]
BGIOSGA023758	150	120	164	238	1458	746	3.04995	2.39831	3.40037	5.11896	26.6004	15.4746	7.16278e-06	2.13777	up	[J]	Translation, ribosomal structure and biogenesis	Molecular Function: RNA binding (GO:0003723);;	K13207|6.5e-282|osa:4344194|K13207 CUG-BP- and ETR3-like factor | (RefSeq) RNA-binding protein BRN1 isoform X1	--	[A]	RNA processing and modification	RNA recognition motif. (a.k.a. RRM, RBD, or RNP domain)	RNA-binding protein BRN1 OS=Arabidopsis thaliana OX=3702 GN=BRN1 PE=2 SV=1	S	Function unknown	RNA-binding protein BRN1 isoform X2 [Oryza sativa Japonica Group]
BGIOSGA034184	1437	1405	1453	231	175	267	54.488	52.2165	56.1239	9.2362	5.92079	10.3016	2.80734e-42	-2.34385	down	--	--	Molecular Function: molecular_function (GO:0003674);; Molecular Function: transcription factor activity, sequence-specific DNA binding (GO:0003700);; Biological Process: regulation of transcription, DNA-templated (GO:0006355);; Biological Process: biological_process (GO:0008150);; Biological Process: regulation of biosynthetic process (GO:0009889);; Biological Process: regulation of gene expressi…	--	--	--	--	--	Protein NLP2 OS=Oryza sativa subsp. japonica OX=39947 GN=NLP2 PE=2 SV=2	--	--	hypothetical protein OsI_35728 [Oryza sativa Indica Group]
BGIOSGA007620	251	205	156	67	43	45	2.59956	2.08065	1.64639	0.735467	0.395442	0.469074	5.3808e-06	-1.54688	down	--	--	--	--	--	--	--	--	Putative E3 ubiquitin-protein ligase LIN-1 OS=Lotus japonicus OX=34305 GN=CERBERUS PE=2 SV=2	S	Function unknown	hypothetical protein OsI_06007 [Oryza sativa Indica Group]
BGIOSGA002780	0	0	0	1114	793	944	0	0	0	34.7974	20.9547	28.3531	4.06498e-99	7.84331	up	--	--	--	--	--	--	--	Protein of unknown function (DUF1668)	--	S	Function unknown	hypothetical protein OsI_00399 [Oryza sativa Indica Group]
BGIOSGA028636	24	45	17	176	136	169	0.979857	1.82491	0.699808	7.68146	5.03921	7.12957	5.94771e-10	2.33492	up	[J]	Translation, ribosomal structure and biogenesis	Molecular Function: structural constituent of ribosome (GO:0003735);; Cellular Component: ribosome (GO:0005840);; Biological Process: translation (GO:0006412);; Molecular Function: protein dimerization activity (GO:0046983);;	K02899|9.9e-66|dosa:Os04t0321500-00|K02899 large subunit ribosomal protein L27 | (RefSeq) Os04g0321500; 50S ribosomal protein L27.	Ribosome (ko03010)	[J]	Translation, ribosomal structure and biogenesis	Ribosomal L27 protein	50S ribosomal protein L27, chloroplastic OS=Phaeodactylum tricornutum (strain CCAP 1055/1) OX=556484 GN=rpl27 PE=3 SV=1	J	Translation, ribosomal structure and biogenesis	hypothetical protein OsI_29172 [Oryza sativa Indica Group]
BGIOSGA016149	67	7	13	130	154	211	1.10167	0.105631	0.211657	2.26906	2.27548	3.54899	0.00193099	1.77599	up	--	--	--	--	--	--	--	TNP1/EN/SPM transposase	--	S	Function unknown	hypothetical protein OsI_15399 [Oryza sativa Indica Group]
BGIOSGA007104	7	10	12	104	90	44	0.085793	0.139364	0.163653	1.56621	1.14055	0.632812	1.25297e-07	2.46647	up	--	--	Cellular Component: integral component of membrane (GO:0016021);;	K00924|4.7e-07|obr:102719965|K00924 kinase [EC:2.7.1.-] | (RefSeq) receptor-like protein kinase 5	--	--	--	Leucine rich repeat	Tyrosine-sulfated glycopeptide receptor 1 OS=Arabidopsis thaliana OX=3702 GN=PSY1R PE=1 SV=1	S	Function unknown	hypothetical protein OsI_05911 [Oryza sativa Indica Group]
BGIOSGA013749	62	86	60	161	354	235	1.74696	2.36561	1.70673	4.81732	8.97038	6.77158	2.82481e-06	1.83467	up	--	--	--	--	--	--	--	Domain of unknown function (DUF569)	--	S	Function unknown	hypothetical protein OsI_13936 [Oryza sativa Indica Group]
BGIOSGA001576	49	61	68	124	399	243	0.917318	1.11375	1.30779	2.46983	6.73955	4.6787	1.15221e-05	1.94397	up	--	--	Cellular Component: integral component of membrane (GO:0016021);; Molecular Function: transferase activity, transferring glycosyl groups (GO:0016757);;	K18134|1.9e-82|gab:108463406|K18134 EGF domain-specific O-GlcNAc transferase [EC:2.4.1.255] | (RefSeq) uncharacterized protein LOC108463406	Other types of O-glycan biosynthesis (ko00514)	[S]	Function unknown	Protein of unknown function (DUF563)	Xylan glycosyltransferase MUCI21 OS=Arabidopsis thaliana OX=3702 GN=MUCI21 PE=1 SV=1	S	Function unknown	uncharacterized protein LOC4324540 [Oryza sativa Japonica Group]
BGIOSGA002455	402	716	340	836	1009	2348	40.4492	70.6153	34.8102	88.9018	90.8005	240.366	0.000286773	1.51655	up	--	--	Molecular Function: serine-type endopeptidase inhibitor activity (GO:0004867);; Cellular Component: extracellular region (GO:0005576);;	--	--	--	--	Bowman-Birk serine protease inhibitor family	Bowman-Birk type wound-induced proteinase inhibitor WIP1 OS=Zea mays OX=4577 GN=WIP1 PE=2 SV=1	S	Function unknown	Bowman-Birk type wound-induced proteinase inhibitor WIP1 [Oryza sativa Japonica Group]
BGIOSGA029062	15	24	40	68	125	72	0.389016	0.601647	1.06633	1.87322	2.90985	1.90556	0.00235815	1.55425	up	--	--	Biological Process: lipid metabolic process (GO:0006629);; Molecular Function: phosphoric diester hydrolase activity (GO:0008081);;	K18696|4.7e-203|dosa:Os08t0535700-00|K18696 glycerophosphodiester phosphodiesterase [EC:3.1.4.46] | (RefSeq) Os08g0535700; Similar to glycerophosphodiester phosphodiesterase.	Glycerophospholipid metabolism (ko00564)	[R]	General function prediction only	Glycerophosphoryl diester phosphodiesterase family	Glycerophosphodiester phosphodiesterase GDPD1, chloroplastic OS=Arabidopsis thaliana OX=3702 GN=GDPD1 PE=1 SV=1	C	Energy production and conversion	hypothetical protein OsI_30040 [Oryza sativa Indica Group]
BGIOSGA037052	157	145	215	258	446	353	1.6074	1.4544	2.24319	2.79215	4.09538	3.6858	0.000952243	1.18368	up	--	--	Cellular Component: nuclear pore (GO:0005643);; Molecular Function: structural constituent of nuclear pore (GO:0017056);;	K14297|0.0e+00|dosa:Os12t0165900-01|K14297 nuclear pore complex protein Nup98-Nup96 | (RefSeq) Os12g0165900; Hypothetical conserved gene.	RNA transport (ko03013)	[YU]	Nuclear structure;; Intracellular trafficking, secretion, and vesicular transport	Nucleoporin autopeptidase	Nuclear pore complex protein NUP98A OS=Arabidopsis thaliana OX=3702 GN=NUP98A PE=1 SV=1	U	Intracellular trafficking, secretion, and vesicular transport	hypothetical protein OsI_37598 [Oryza sativa Indica Group]
BGIOSGA003485	157	160	89	0	0	0	16.0384	16.0959	9.24854	0	0	0	2.62845e-22	-4.54705	down	--	--	--	--	--	--	--	--	--	--	--	hypothetical protein OsI_01842 [Oryza sativa Indica Group]
BGIOSGA002445	299	675	929	3321	1654	2123	20.2275	44.8172	64.0846	237.909	100.217	146.313	5.66667e-07	1.85869	up	[O]	Posttranslational modification, protein turnover, chaperones	Biological Process: response to heat (GO:0009408);;	K13993|1.5e-77|dosa:Os01t0136000-00|K13993 HSP20 family protein | (RefSeq) Os01g0136000, HSP16.9C, 16.9_KDA_CLASS_I_HEAT_SHOCK_PROTEIN_3; Similar to Cytosolic class I small heat-shock protein HSP17.5.	Protein processing in endoplasmic reticulum (ko04141)	[O]	Posttranslational modification, protein turnover, chaperones	Hsp20/alpha crystallin family	16.9 kDa class I heat shock protein 3 OS=Oryza sativa subsp. japonica OX=39947 GN=HSP16.9C PE=2 SV=1	O	Posttranslational modification, protein turnover, chaperones	heat shock protein [Oryza sativa Japonica Group]
BGIOSGA037733	203	117	48	18	15	15	9.9801	5.63413	2.37651	0.936135	0.645942	0.717555	0.000133493	-1.94449	down	--	--	Biological Process: regulation of transcription, DNA-templated (GO:0006355);; Molecular Function: protein dimerization activity (GO:0046983);;	K16189|6.7e-07|boe:106337536|K16189 phytochrome-interacting factor 4 | (RefSeq) transcription factor PIF4-like isoform X1	Plant hormone signal transduction (ko04075)	--	--	Helix-loop-helix DNA-binding domain	Transcription factor PIF1 OS=Arabidopsis thaliana OX=3702 GN=PIF1 PE=1 SV=1	S	Function unknown	hypothetical protein OsI_38989 [Oryza sativa Indica Group]
BGIOSGA014554	829	1006	1654	96	206	95	15.7679	18.7663	32.0485	1.92427	3.49788	1.82586	1.72835e-10	-2.40945	down	[T]	Signal transduction mechanisms	Molecular Function: protein kinase activity (GO:0004672);; Molecular Function: calcium ion binding (GO:0005509);; Molecular Function: ATP binding (GO:0005524);;	K13412|1.4e-266|dosa:Os04t0560600-01|K13412 calcium-dependent protein kinase [EC:2.7.11.1] | (RefSeq) Os04g0560600; Similar to Calcium-dependent protein kinase 3 (Fragment).	Plant-pathogen interaction (ko04626)	[T]	Signal transduction mechanisms	Protein kinase domain	Calcium-dependent protein kinase 12 OS=Oryza sativa subsp. japonica OX=39947 GN=CPK12 PE=2 SV=2	T	Signal transduction mechanisms	calcium-dependent protein kinase 12 [Oryza sativa Japonica Group]
BGIOSGA028081	334	231	223	716	588	686	8.9805	6.08523	6.09691	20.4115	14.1678	18.8163	1.15343e-11	1.52013	up	--	--	Molecular Function: molecular_function (GO:0003674);; Molecular Function: catalytic activity (GO:0003824);; Molecular Function: phosphopantothenate--cysteine ligase activity (GO:0004632);; Biological Process: nucleobase-containing compound metabolic process (GO:0006139);; Biological Process: purine nucleotide metabolic process (GO:0006163);; Biological Process: purine nucleotide biosynthetic proc…	K01922|9.2e-164|dosa:Os08t0176100-01|K01922 phosphopantothenate---cysteine ligase (ATP) [EC:6.3.2.51] | (RefSeq) Os08g0176100; DNA/pantothenate metabolism flavoprotein, C-terminal domain containing protein.	Pantothenate and CoA biosynthesis (ko00770)	[R]	General function prediction only	DNA / pantothenate metabolism flavoprotein	Phosphopantothenate--cysteine ligase 2 OS=Oryza sativa subsp. japonica OX=39947 GN=Os08g0176100 PE=2 SV=2	H	Coenzyme transport and metabolism	hypothetical protein EE612_042429 [Oryza sativa]
BGIOSGA016228	160	110	168	29	30	34	1.27659	0.858858	1.36505	0.238831	0.211807	0.276591	1.56103e-06	-1.73118	down	[R]	General function prediction only	Molecular Function: ADP binding (GO:0043531);;	K15078|1.9e-99|tcc:18614561|K15078 structure-specific endonuclease subunit SLX1 [EC:3.6.1.-] | (RefSeq) putative disease resistance protein RGA3	--	[T]	Signal transduction mechanisms	NB-ARC domain	Putative disease resistance protein RGA1 OS=Solanum bulbocastanum OX=147425 GN=RGA1 PE=2 SV=2	S	Function unknown	hypothetical protein OsI_15587 [Oryza sativa Indica Group]
BGIOSGA010794	345	403	709	809	2588	1896	8.24646	9.42733	17.248	20.4349	55.3447	46.1341	2.31934e-05	1.79574	up	[T]	Signal transduction mechanisms	Molecular Function: protein serine/threonine kinase activity (GO:0004674);; Molecular Function: ATP binding (GO:0005524);;	K04688|6.6e-227|dosa:Os03t0334000-02|K04688 ribosomal protein S6 kinase beta [EC:2.7.11.1] | (RefSeq) Os03g0334000; Similar to Ribosomal protein S6 kinase.	--	[RT]	General function prediction only;; Signal transduction mechanisms	Protein kinase domain	Serine/threonine-protein kinase AtPK2/AtPK19 OS=Arabidopsis thaliana OX=3702 GN=ATPK2 PE=1 SV=2	T	Signal transduction mechanisms	hypothetical protein OsI_11445 [Oryza sativa Indica Group]
BGIOSGA036264	97	128	45	7	0	10	6.93003	8.98967	3.25686	0.524411	0	0.722691	9.57281e-05	-2.18257	down	--	--	Cellular Component: integral component of membrane (GO:0016021);;	K05016|5.1e-67|osa:4352132|K05016 chloride channel 7 | (RefSeq) chloride channel protein CLC-a	--	[P]	Inorganic ion transport and metabolism	--	Chloride channel protein CLC-b OS=Arabidopsis thaliana OX=3702 GN=CLC-B PE=1 SV=1	P	Inorganic ion transport and metabolism	hypothetical protein OsI_38196 [Oryza sativa Indica Group]
BGIOSGA000135	85	96	188	351	2075	755	2.65915	2.9411	6.0209	11.7113	58.5578	24.229	0.00117014	1.90886	up	--	--	Molecular Function: hydrolase activity, hydrolyzing O-glycosyl compounds (GO:0004553);; Biological Process: carbohydrate metabolic process (GO:0005975);;	K19891|3.4e-50|smo:SELMODRAFT_87871|K19891 glucan endo-1,3-beta-glucosidase 1/2/3 [EC:3.2.1.39] | (RefSeq) hypothetical protein	Starch and sucrose metabolism (ko00500)	--	--	Glycosyl hydrolases family 17	Lichenase-2 (Fragment) OS=Hordeum vulgare OX=4513 PE=1 SV=1	G	Carbohydrate transport and metabolism	hypothetical protein OsJ_04727 [Oryza sativa Japonica Group]
BGIOSGA028179	234	252	238	480	423	427	6.03909	6.37777	6.26375	13.1025	9.78364	11.2298	4.66877e-10	1.10839	up	--	--	Molecular Function: protein binding (GO:0005515);;	K11426|2.2e-200|dosa:Os08t0205300-01|K11426 [histone H3]-lysine4/36 N-trimethyltransferase SMYD [EC:2.1.1.354 2.1.1.357] | (RefSeq) Os08g0205300; Hypothetical conserved gene.	Lysine degradation (ko00310)	[B]	Chromatin structure and dynamics	SET domain	Histone-lysine N-methyltransferase ASHR2 OS=Arabidopsis thaliana OX=3702 GN=ASHR2 PE=2 SV=3	S	Function unknown	hypothetical protein OsI_28216 [Oryza sativa Indica Group]
BGIOSGA025664	87	98	81	14	24	31	1.43762	1.59694	1.37215	0.243269	0.357493	0.509059	0.00300201	-1.37249	down	--	--	--	K22761|0.0e+00|dosa:Os07t0467900-01|K22761 DNA-directed primase/polymerase protein [EC:2.7.7.102 2.7.7.7] | (RefSeq) Os07g0467900; Similar to DNA primase.	--	--	--	Herpesviridae UL52/UL70 DNA primase	--	S	Function unknown	hypothetical protein OsI_25931 [Oryza sativa Indica Group]
BGIOSGA026784	25	34	36	43	449	51	1.24143	1.66718	1.84367	2.29926	20.5022	2.63027	0.00800094	1.62297	up	--	--	Cellular Component: integral component of membrane (GO:0016021);;	--	--	--	--	--	--	S	Function unknown	uncharacterized protein LOC4345862 [Oryza sativa Japonica Group]
BGIOSGA014985	1389	921	840	489	247	276	27.5248	17.8802	16.9332	10.2319	4.36242	5.54544	7.11721e-05	-1.27447	down	[G]	Carbohydrate transport and metabolism	Cellular Component: integral component of membrane (GO:0016021);; Molecular Function: transmembrane transporter activity (GO:0022857);;	K24193|2.2e-184|ats:109761251|K24193 MFS transporter, SP family, sugar:H+ symporter | (RefSeq) LOC109761251; sugar transport protein 5-like	--	[R]	General function prediction only	Sugar (and other) transporter	Sugar transport protein MST1 OS=Oryza sativa subsp. japonica OX=39947 GN=MST1 PE=2 SV=1	G	Carbohydrate transport and metabolism	sugar transport protein MST1-like [Oryza sativa Japonica Group]
Oryza_sativa_newGene_3796	4	7	0	46	53	39	0.180257	0.369153	0	2.60928	2.51994	2.10464	3.21058e-05	2.2903	up	--	--	Molecular Function: zinc ion binding (GO:0008270);;	K11816|6.5e-15|ats:109783187|K11816 indole-3-pyruvate monooxygenase [EC:1.14.13.168] | (RefSeq) uncharacterized protein LOC109783187	Tryptophan metabolism (ko00380)	--	--	Plant mobile domain	--	S	Function unknown	OSJNBa0014F04.28 [Oryza sativa Japonica Group]
BGIOSGA037665	187	179	113	17	32	46	1.53192	1.43234	0.937175	0.143877	0.234504	0.382122	0.000169323	-1.67804	down	--	--	Molecular Function: calmodulin binding (GO:0005516);; Cellular Component: membrane (GO:0016020);; Molecular Function: hydrolase activity, acting on glycosyl bonds (GO:0016798);;	K07964|0.0e+00|dosa:Os12t0578400-01|K07964 heparanase [EC:3.2.1.166] | (RefSeq) Os12g0578400; Glycoside hydrolase family 79, N-terminal protein.	Glycosaminoglycan degradation (ko00531)	--	--	Glycosyl hydrolase family 79, N-terminal domain	Heparanase-like protein 1 OS=Arabidopsis thaliana OX=3702 GN=At5g07830 PE=2 SV=1	G	Carbohydrate transport and metabolism	hypothetical protein OsI_38868 [Oryza sativa Indica Group]
BGIOSGA003390	89	95	130	324	218	182	1.48092	1.54579	2.19163	5.70298	3.24394	3.08542	7.80061e-05	1.322	up	--	--	Molecular Function: RNA binding (GO:0003723);;	--	--	--	--	CRS1 / YhbY (CRM) domain	CRS2-associated factor 2, chloroplastic OS=Oryza sativa subsp. japonica OX=39947 GN=Os01g0323300 PE=3 SV=1	A	RNA processing and modification	hypothetical protein OsI_01650 [Oryza sativa Indica Group]
BGIOSGA012054	24	47	61	64	1258	804	0.601451	1.19594	1.60526	1.75185	29.3935	21.3602	0.00658481	1.66548	up	--	--	Cellular Component: integral component of membrane (GO:0016021);;	--	--	--	--	Protein of unknown function (DUF677)	UPF0496 protein 1 OS=Oryza sativa subsp. indica OX=39946 GN=OsI_010151 PE=2 SV=1	S	Function unknown	UPF0496 protein 1 [Oryza sativa Japonica Group]
BGIOSGA012292	340	265	229	407	944	497	17.5384	13.3971	11.9968	22.1831	43.5436	26.0672	0.00202831	1.25899	up	--	--	Molecular Function: metal ion binding (GO:0046872);;	K09377|4.6e-98|zma:100281283|K09377 cysteine and glycine-rich protein | (RefSeq) LIM6; pollen-specific protein SF3	--	[TZ]	Signal transduction mechanisms;; Cytoskeleton	LIM domain	LIM domain-containing protein WLIM2a OS=Arabidopsis thaliana OX=3702 GN=WLIN2A PE=1 SV=1	S	Function unknown	LIM domain-containing protein WLIM2a [Oryza sativa Japonica Group]
BGIOSGA008512	99437	103189	57746	31401	28224	27886	9627.75	9790	5693.16	3214.05	2443.75	2746.49	2.77264e-07	-1.23922	down	--	--	--	--	--	--	--	--	--	--	--	hypothetical protein OsI_07851 [Oryza sativa Indica Group]
Oryza_sativa_newGene_1938	0	0	4	160	160	146	0	0	0.038495	1.73549	1.82459	1.8771	9.34063e-31	4.87789	up	--	--	Molecular Function: DNA binding (GO:0003677);; Molecular Function: protein dimerization activity (GO:0046983);;	K19984|8.5e-45|psom:113272286|K19984 exocyst complex component 5 | (RefSeq) uncharacterized protein LOC113272286	--	[L]	Replication, recombination and repair	hAT family C-terminal dimerisation region	Zinc finger BED domain-containing protein RICESLEEPER 2 OS=Oryza sativa subsp. japonica OX=39947 GN=Os03g0733400 PE=2 SV=1	L	Replication, recombination and repair	zinc finger BED domain-containing protein RICESLEEPER 2-like [Oryza sativa Japonica Group]
BGIOSGA011329	60	67	35	51	403	163	1.8423	2.0265	1.10505	1.66627	11.199	5.13278	0.00893973	1.52092	up	--	--	Molecular Function: DNA binding (GO:0003677);; Molecular Function: transcription factor activity, sequence-specific DNA binding (GO:0003700);; Cellular Component: nucleus (GO:0005634);;	K09286|5.2e-70|obr:102705895|K09286 EREBP-like factor | (RefSeq) ethylene-responsive transcription factor RAP2-12-like	--	--	--	AP2 domain	Ethylene-responsive transcription factor RAP2-12 OS=Arabidopsis thaliana OX=3702 GN=RAP2-12 PE=1 SV=1	S	Function unknown	hypothetical protein OsI_10274 [Oryza sativa Indica Group]
BGIOSGA016214	527	1059	1324	2495	1542	1974	15.8746	31.3027	40.6627	79.5571	41.5967	60.5575	0.000782531	1.17147	up	[CR]	Energy production and conversion;; General function prediction only	Molecular Function: oxidoreductase activity (GO:0016491);;	K00224|1.5e-181|osa:4335599|K00224 chloroplastic oxoene reductase [EC:1.3.1.-] | (RefSeq) putative quinone-oxidoreductase homolog, chloroplastic	alpha-Linolenic acid metabolism (ko00592)	[CR]	Energy production and conversion;; General function prediction only	Zinc-binding dehydrogenase	Chloroplast envelope quinone oxidoreductase homolog OS=Arabidopsis thaliana OX=3702 GN=CEQORH PE=1 SV=1	C	Energy production and conversion	hypothetical protein OsI_15552 [Oryza sativa Indica Group]
BGIOSGA011433	50	31	58	143	195	207	1.42991	0.864412	1.70527	4.39955	5.07769	6.12329	5.63428e-08	1.95815	up	--	--	Biological Process: metal ion transport (GO:0030001);; Molecular Function: metal ion binding (GO:0046872);;	--	--	[P]	Inorganic ion transport and metabolism	Heavy-metal-associated domain	Heavy metal-associated isoprenylated plant protein 5 OS=Arabidopsis thaliana OX=3702 GN=HIPP05 PE=1 SV=2	S	Function unknown	hypothetical protein OsI_10051 [Oryza sativa Indica Group]
BGIOSGA002586	267	292	360	578	555	505	8.14723	8.73341	11.1768	18.6503	15.1345	15.6547	2.01148e-06	1.0545	up	--	--	--	--	--	--	--	--	--	S	Function unknown	uncharacterized protein LOC4326468 [Oryza sativa Japonica Group]
BGIOSGA000173	6	4	6	94	113	109	0.208883	0.112189	0.21017	3.72203	3.81195	4.17988	3.32615e-19	3.60447	up	[I]	Lipid transport and metabolism	Molecular Function: molecular_function (GO:0003674);; Molecular Function: catalytic activity (GO:0003824);; Molecular Function: hydrolase activity (GO:0016787);; Molecular Function: hydrolase activity, acting on ester bonds (GO:0016788);; Molecular Function: carboxylic ester hydrolase activity (GO:0052689);; Molecular Function: methyl jasmonate esterase activity (GO:0080032);;	K20802|1.6e-45|eus:EUTSA_v10014451mg|K20802 (R)-mandelonitrile lyase [EC:4.1.2.10] | (RefSeq) hypothetical protein	Cyanoamino acid metabolism (ko00460)	--	--	Alpha/beta hydrolase family	Esterase PIR7B OS=Oryza sativa subsp. indica OX=39946 GN=PIR7B PE=3 SV=2	S	Function unknown	hypothetical protein OsI_05085 [Oryza sativa Indica Group]
BGIOSGA003518	0	0	0	53	43	36	0	0	0	1.11627	0.763044	0.724875	1.14334e-11	3.47433	up	--	--	Molecular Function: calcium ion binding (GO:0005509);; Cellular Component: integral component of membrane (GO:0016021);; Molecular Function: polysaccharide binding (GO:0030247);;	K23544|4.6e-17|brp:103842861|K23544 serine incorporator 1/3 | (RefSeq) serine incorporator 3	--	--	--	Wall-associated receptor kinase galacturonan-binding	Wall-associated receptor kinase 5 OS=Arabidopsis thaliana OX=3702 GN=WAK5 PE=2 SV=1	--	--	hypothetical protein OsI_01925 [Oryza sativa Indica Group]
BGIOSGA004500	15259	14441	21839	79714	2052254	1099019	310.255	287.704	452.156	1713.43	37315.4	22731.3	1.47647e-09	3.18539	up	--	--	Molecular Function: nutrient reservoir activity (GO:0045735);;	--	--	--	--	Cupin	Glutelin type-A 1 OS=Oryza sativa subsp. japonica OX=39947 GN=GLUA1 PE=1 SV=2	S	Function unknown	hypothetical protein OsI_03835 [Oryza sativa Indica Group]
Oryza_sativa_newGene_1823	76	129	89	207	756	365	0.822673	1.3696	1.22679	2.8102	7.68562	4.421	1.17332e-05	1.98257	up	--	--	--	--	--	--	--	--	--	--	--	hypothetical protein [Oryza sativa Japonica Group]
BGIOSGA025638	7	12	23	40	316	251	0.225178	0.376627	0.761193	1.38985	9.42887	8.53252	1.28129e-06	2.56494	up	--	--	--	--	--	--	--	--	--	--	--	hypothetical protein OsI_25879 [Oryza sativa Indica Group]
BGIOSGA028834	8029	9509	15416	3275	2780	5783	186.351	216.256	364.346	80.3559	57.6933	136.521	0.00183318	-1.10543	down	[G]	Carbohydrate transport and metabolism	Molecular Function: alpha-amylase activity (GO:0004556);; Molecular Function: calcium ion binding (GO:0005509);; Biological Process: carbohydrate metabolic process (GO:0005975);; Molecular Function: alpha-amylase activity (releasing maltohexaose) (GO:0103025);;	K01176|4.5e-271|dosa:Os08t0473600-01|K01176 alpha-amylase [EC:3.2.1.1] | (RefSeq) Os08g0473600, AMY3E, ALPHA-AMYLASE_3E; Alpha-amylase isozyme 3E precursor (EC 3.2.1.1) (1,4-alpha-D-glucan glucanohydrolase).	Starch and sucrose metabolism (ko00500)	[G]	Carbohydrate transport and metabolism	Alpha-amylase C-terminal beta-sheet domain	Alpha-amylase isozyme 3E OS=Oryza sativa subsp. japonica OX=39947 GN=AMY1.4 PE=2 SV=1	G	Carbohydrate transport and metabolism	alpha-amylase isozyme 3E [Oryza sativa Japonica Group]
BGIOSGA034680	103	116	95	0	0	9	8.52095	9.39951	8.00699	0	0	0.745105	6.72913e-06	-2.49157	down	--	--	Biological Process: lipid transport (GO:0006869);; Molecular Function: lipid binding (GO:0008289);;	--	--	--	--	Protease inhibitor/seed storage/LTP family	Non-specific lipid-transfer protein 3 OS=Oryza sativa subsp. indica OX=39946 GN=LTP110-A PE=2 SV=1	U	Intracellular trafficking, secretion, and vesicular transport	non-specific lipid-transfer protein 3 [Oryza sativa Japonica Group]
BGIOSGA008698	187	146	146	189	986	455	5.93616	4.52848	4.72241	6.33692	27.9892	14.6983	0.00128319	1.61082	up	--	--	Molecular Function: DNA binding (GO:0003677);; Cellular Component: nucleus (GO:0005634);;	K09422|3.0e-171|osa:4330115|K09422 transcription factor MYB, plant | (RefSeq) transcription factor MYB21	--	[K]	Transcription	Myb-like DNA-binding domain	Transcription factor LAF1 OS=Arabidopsis thaliana OX=3702 GN=LAF1 PE=1 SV=2	K	Transcription	hypothetical protein OsI_08236 [Oryza sativa Indica Group]
BGIOSGA007252	20957	15802	10081	6250	2748	3450	432.157	319.295	211.678	136.24	50.6733	72.353	4.89856e-06	-1.51005	down	[P]	Inorganic ion transport and metabolism	Molecular Function: catalase activity (GO:0004096);; Biological Process: response to oxidative stress (GO:0006979);; Molecular Function: heme binding (GO:0020037);; Biological Process: hydrogen peroxide catabolic process (GO:0042744);; Molecular Function: metal ion binding (GO:0046872);;	K03781|1.7e-290|dosa:Os02t0115700-01|K03781 catalase [EC:1.11.1.6] | (RefSeq) Os02g0115700, CATALASE_A, CATA; Catalase isozyme A (EC 1.11.1.6) (CAT-A).	Tryptophan metabolism (ko00380);; Glyoxylate and dicarboxylate metabolism (ko00630);; Carbon metabolism (ko01200);; MAPK signaling pathway - plant (ko04016);; Peroxisome (ko04146)	[P]	Inorganic ion transport and metabolism	Catalase	Catalase isozyme A OS=Oryza sativa subsp. indica OX=39946 PE=2 SV=1	P	Inorganic ion transport and metabolism	catalase isozyme A [Oryza sativa Japonica Group]
BGIOSGA024487	9	12	10	88	63	61	0.069082	0.090869	0.072363	0.727256	0.441119	0.481387	4.36118e-09	2.44654	up	[R]	General function prediction only	Molecular Function: ADP binding (GO:0043531);;	K10750|2.1e-130|osa:107276899|K10750 chromatin assembly factor 1 subunit A | (RefSeq) chromatin assembly factor 1 subunit FSM-like isoform X1	--	[T]	Signal transduction mechanisms	NB-ARC domain	Putative disease resistance protein At3g14460 OS=Arabidopsis thaliana OX=3702 GN=At3g14460 PE=3 SV=1	S	Function unknown	hypothetical protein OsI_25613 [Oryza sativa Indica Group]
BGIOSGA033657	76	93	87	166	213	183	4.20102	5.072	4.90709	9.78858	10.6028	10.3914	2.01787e-05	1.29974	up	--	--	Cellular Component: integral component of membrane (GO:0016021);;	K13523|3.5e-60|dosa:Os11t0637800-01|K13523 lysophosphatidic acid acyltransferase / lysophosphatidylinositol acyltransferase [EC:2.3.1.51 2.3.1.-] | (RefSeq) Os11g0637800; Similar to 1-acyl-sn-glycerol-3-phosphate acyltransferase PLS1.	Glycerolipid metabolism (ko00561);; Glycerophospholipid metabolism (ko00564)	[I]	Lipid transport and metabolism	Acyltransferase C-terminus	1-acyl-sn-glycerol-3-phosphate acyltransferase PLS1 OS=Zea mays OX=4577 GN=PLS1 PE=2 SV=1	S	Function unknown	hypothetical protein OsI_36789 [Oryza sativa Indica Group]
BGIOSGA029386	2	7	0	299	251	302	0.044985	0.141491	0	7.47558	5.30682	7.26521	1.98799e-47	5.38496	up	[T]	Signal transduction mechanisms	Molecular Function: protein serine/threonine kinase activity (GO:0004674);; Molecular Function: ATP binding (GO:0005524);;	K13430|1.7e-68|pxb:103938514|K13430 serine/threonine-protein kinase PBS1 [EC:2.7.11.1] | (RefSeq) serine/threonine-protein kinase CDL1-like isoform X1	Plant-pathogen interaction (ko04626)	[T]	Signal transduction mechanisms	Protein kinase domain	PTI1-like tyrosine-protein kinase At3g15890 OS=Arabidopsis thaliana OX=3702 GN=At3g15890 PE=2 SV=1	T	Signal transduction mechanisms	hypothetical protein OsI_32145 [Oryza sativa Indica Group]
BGIOSGA019362	48	89	80	106	259	276	1.08673	2.00099	1.85554	2.58116	5.33317	6.45749	0.00100243	1.51153	up	[IR]	Lipid transport and metabolism;; General function prediction only	Molecular Function: hydrolase activity, acting on ester bonds (GO:0016788);;	K01206|2.0e-24|aly:9323213|K01206 alpha-L-fucosidase [EC:3.2.1.51] | (RefSeq) alpha-L-fucosidase 3	Other glycan degradation (ko00511)	--	--	GDSL-like Lipase/Acylhydrolase	GDSL esterase/lipase At1g28580 OS=Arabidopsis thaliana OX=3702 GN=At1g28580 PE=2 SV=1	--	--	hypothetical protein OsI_18872 [Oryza sativa Indica Group]
BGIOSGA006017	51	52	69	140	124	155	0.666073	0.667568	0.916197	1.94661	1.46043	2.06993	6.72913e-06	1.41217	up	[IR]	Lipid transport and metabolism;; General function prediction only	Cellular Component: integral component of membrane (GO:0016021);; Molecular Function: long-chain-alcohol oxidase activity (GO:0046577);; Molecular Function: flavin adenine dinucleotide binding (GO:0050660);;	K17756|0.0e+00|dosa:Os02t0621800-01|K17756 long-chain-alcohol oxidase [EC:1.1.3.20] | (RefSeq) Os02g0621800, HYBRID_WEAKNESS_H1, HWH1; Glucose-methanol-choline (GMC) oxidoreductase family protein, Hybrid breakdown (HB)	--	--	--	GMC oxidoreductase	Long-chain-alcohol oxidase FAO2 OS=Lotus japonicus OX=34305 GN=FAO2 PE=2 SV=1	E	Amino acid transport and metabolism	hypothetical protein OsI_08118 [Oryza sativa Indica Group]
BGIOSGA015217	3108	2663	2714	10327	7245	9228	80.5852	67.6684	71.6577	283.123	168.014	243.436	1.16526e-39	1.87384	up	[F]	Nucleotide transport and metabolism	Biological Process: fatty acid biosynthetic process (GO:0006633);; Cellular Component: chloroplast (GO:0009507);; Molecular Function: acyl-[acyl-carrier-protein] desaturase activity (GO:0045300);; Molecular Function: metal ion binding (GO:0046872);;	K03921|1.1e-223|dosa:Os04t0379900-01|K03921 acyl-[acyl-carrier-protein] desaturase [EC:1.14.19.2 1.14.19.11 1.14.19.26] | (RefSeq) Os04g0379900; Similar to Acyl-[acyl-carrier-protein] desaturase, chloroplast precursor (EC 1.14.19.2) (Stearoyl-ACP desaturase).	Fatty acid biosynthesis (ko00061);; Biosynthesis of unsaturated fatty acids (ko01040);; Fatty acid metabolism (ko01212)	--	--	Fatty acid desaturase	Stearoyl-[acyl-carrier-protein] 9-desaturase 5, chloroplastic OS=Oryza sativa subsp. indica OX=39946 GN=OsI_15603 PE=3 SV=1	I	Lipid transport and metabolism	RecName: Full=Stearoyl-[acyl-carrier-protein] 9-desaturase 5, chloroplastic; Short=Stearoyl-ACP desaturase 5; AltName: Full=Acyl-[acyl-carrier-protein] desaturase 5; Flags: Precursor [Oryza sativa Indica Group]
BGIOSGA018710	35	70	105	168	173	146	2.97811	5.9578	9.23603	15.3433	13.4	12.8277	0.00626293	1.24179	up	--	--	--	--	--	--	--	--	--	S	Function unknown	uncharacterized protein LOC4337962 [Oryza sativa Japonica Group]
BGIOSGA022415	60	42	34	128	82	110	1.73643	1.19239	1.00504	3.92515	2.12945	3.24692	0.000970073	1.29852	up	[Q]	Secondary metabolites biosynthesis, transport and catabolism	Molecular Function: oxidoreductase activity (GO:0016491);; Molecular Function: metal ion binding (GO:0046872);;	K05278|5.6e-54|cqi:110714529|K05278 flavonol synthase [EC:1.14.20.6] | (RefSeq) flavonol synthase/flavanone 3-hydroxylase-like	Flavonoid biosynthesis (ko00941)	[QR]	Secondary metabolites biosynthesis, transport and catabolism;; General function prediction only	2OG-Fe(II) oxygenase superfamily	Protein SRG1 OS=Arabidopsis thaliana OX=3702 GN=SRG1 PE=2 SV=1	S	Function unknown	hypothetical protein OsI_21887 [Oryza sativa Indica Group]
BGIOSGA000144	203	211	244	385	381	426	12.4861	12.7114	15.3014	25.0429	20.9767	26.6615	2.67937e-07	1.07989	up	--	--	--	--	--	--	--	--	--	S	Function unknown	hypothetical protein OsI_05130 [Oryza sativa Indica Group]
BGIOSGA023072	248	167	225	73	74	98	5.22596	3.44489	4.82823	1.62385	1.37904	2.10172	0.00264226	-1.02443	down	--	--	--	--	--	--	--	D-mannose binding lectin	EP1-like glycoprotein 4 OS=Arabidopsis thaliana OX=3702 GN=At1g78860 PE=3 SV=1	S	Function unknown	hypothetical protein OsI_23330 [Oryza sativa Indica Group]
BGIOSGA002209	60	118	135	137	855	493	0.983867	1.9176	2.27937	2.39931	12.6886	8.31892	0.000299926	1.8674	up	--	--	--	--	--	--	--	--	--	S	Function unknown	hypothetical protein OsI_00747 [Oryza sativa Indica Group]
BGIOSGA029983	84	56	66	20	4	8	1.96489	1.27697	1.5764	0.486715	0.080906	0.179415	0.00130033	-1.73397	down	--	--	--	--	--	--	--	F-box-like	--	S	Function unknown	hypothetical protein OsI_30890 [Oryza sativa Indica Group]
BGIOSGA005533	339	516	640	770	1525	749	7.42065	11.0757	14.2588	17.8271	29.8629	16.6933	0.00510371	1.15401	up	--	--	Cellular Component: integral component of membrane (GO:0016021);;	--	--	--	--	--	Protein CPR-5 OS=Arabidopsis thaliana OX=3702 GN=CPR5 PE=1 SV=1	S	Function unknown	hypothetical protein OsI_09095 [Oryza sativa Indica Group]
BGIOSGA029252	151	101	152	2	3	0	13.643	8.94608	13.982	0.160571	0.226201	0	7.93758e-20	-4.06904	down	--	--	--	--	--	--	--	Domain of unknown function (DUF2828)	--	--	--	hypothetical protein OsI_32427 [Oryza sativa Indica Group]
BGIOSGA035883	438	569	485	618	1740	1035	16.9582	21.6069	19.1465	25.3164	60.3601	40.848	0.00142453	1.29441	up	--	--	--	--	--	--	--	Plant pleckstrin homology-like region	VAN3-binding protein OS=Arabidopsis thaliana OX=3702 GN=VAB PE=1 SV=1	--	--	expressed protein [Oryza sativa Japonica Group]
BGIOSGA016280	7331	5084	5254	6224	15777	10820	192.585	130.849	140.526	172.828	370.618	289.112	0.00684596	1.05888	up	--	--	Biological Process: metal ion transport (GO:0030001);; Molecular Function: metal ion binding (GO:0046872);;	--	--	[P]	Inorganic ion transport and metabolism	Heavy-metal-associated domain	Heavy metal-associated isoprenylated plant protein 7 OS=Arabidopsis thaliana OX=3702 GN=HIPP07 PE=1 SV=1	S	Function unknown	hypothetical protein OsI_15670 [Oryza sativa Indica Group]
BGIOSGA013832	13	10	18	55	61	32	0.856282	0.667328	1.21673	4.04485	3.80219	2.23198	0.00243668	1.58429	up	--	--	Cellular Component: mitochondrion (GO:0005739);;	--	--	[R]	General function prediction only	C2H2-type zinc finger	Zinc finger protein ZAT5 OS=Arabidopsis thaliana OX=3702 GN=ZAT5 PE=2 SV=1	S	Function unknown	zinc finger protein ZAT12 [Oryza sativa Japonica Group]
BGIOSGA002784	167	233	246	19	24	33	10.9604	15.0076	16.5001	1.26551	1.40686	2.19502	5.10379e-13	-2.46858	down	--	--	Cellular Component: nucleosome (GO:0000786);; Molecular Function: DNA binding (GO:0003677);; Cellular Component: nucleus (GO:0005634);; Molecular Function: protein heterodimerization activity (GO:0046982);;	K11252|1.2e-66|dosa:Os01t0152300-00|K11252 histone H2B | (RefSeq) Os01g0152300; Similar to Histone H2B.1.	--	[B]	Chromatin structure and dynamics	Core histone H2A/H2B/H3/H4	Histone H2B.3 OS=Oryza sativa subsp. indica OX=39946 GN=H2B.3 PE=3 SV=1	B	Chromatin structure and dynamics	RecName: Full=Histone H2B.3 [Oryza sativa Indica Group]
Oryza_sativa_newGene_4	56	138	141	31	20	16	1.01276	2.43719	2.97348	0.589642	0.321408	0.291079	0.0011627	-1.60286	down	--	--	--	K17604|2.1e-08|csv:101203656|K17604 zinc finger SWIM domain-containing protein 3 | (RefSeq) uncharacterized protein LOC101203656 isoform X1	--	--	--	MuDR family transposase	--	--	--	hypothetical protein OsI_38297 [Oryza sativa Indica Group]
BGIOSGA031860	104	109	66	23	26	36	2.96231	3.05721	1.89817	0.67653	0.657649	1.02134	0.0078562	-1.21167	down	--	--	Molecular Function: protein binding (GO:0005515);;	K10523|1.6e-202|dosa:Os10t0435400-01|K10523 speckle-type POZ protein | (RefSeq) Os10g0435400; TRAF-type domain containing protein.	--	[DR]	Cell cycle control, cell division, chromosome partitioning;; General function prediction only	BTB/POZ domain	BTB/POZ and MATH domain-containing protein 1 OS=Arabidopsis thaliana OX=3702 GN=BPM1 PE=1 SV=1	S	Function unknown	hypothetical protein OsI_33730 [Oryza sativa Indica Group]
BGIOSGA019917	518	575	776	2239	34443	11923	56.5413	61.5516	86.3453	258.706	3367.02	1325.76	0.000437332	2.05683	up	--	--	Biological Process: response to acid chemical (GO:0001101);; Cellular Component: cellular_component (GO:0005575);; Cellular Component: extracellular region (GO:0005576);; Biological Process: biological_process (GO:0008150);; Biological Process: response to endogenous stimulus (GO:0009719);; Biological Process: response to hormone (GO:0009725);; Biological Process: response to gibberellin (GO:0009…	K03860|5.3e-12|nnu:104608881|K03860 phosphatidylinositol N-acetylglucosaminyltransferase subunit Q | (RefSeq) N-acetylglucosaminyl-phosphatidylinositol biosynthetic protein gpi1-like	Glycosylphosphatidylinositol (GPI)-anchor biosynthesis (ko00563)	--	--	Gibberellin regulated protein	Gibberellin-regulated protein 2 OS=Arabidopsis thaliana OX=3702 GN=GASA2 PE=2 SV=1	S	Function unknown	gibberellin-regulated protein 2 [Oryza sativa Japonica Group]
BGIOSGA002345	156	208	128	220	383	298	2.64884	3.45799	2.21536	3.94262	5.81944	5.15283	0.00657846	1.03828	up	[GHR]	Carbohydrate transport and metabolism;; Coenzyme transport and metabolism;; General function prediction only	Molecular Function: magnesium ion binding (GO:0000287);; Molecular Function: carboxy-lyase activity (GO:0016831);; Molecular Function: thiamine pyrophosphate binding (GO:0030976);;	K01568|0.0e+00|dosa:Os01t0160100-01|K01568 pyruvate decarboxylase [EC:4.1.1.1] | (RefSeq) Os01g0160100; Similar to Pyruvate decarboxylase isozyme 2 (EC 4.1.1.1) (PDC) (Fragment).	Glycolysis / Gluconeogenesis (ko00010)	[EH]	Amino acid transport and metabolism;; Coenzyme transport and metabolism	Thiamine pyrophosphate enzyme, N-terminal TPP binding domain	Pyruvate decarboxylase 1 OS=Zea mays OX=4577 GN=PDC1 PE=2 SV=1	GH	Carbohydrate transport and metabolism;; Coenzyme transport and metabolism	hypothetical protein OsI_00500 [Oryza sativa Indica Group]
BGIOSGA007750	55	82	75	247	14161	4259	1.33316	1.9474	1.85738	6.37246	310.216	106.119	0.00876344	1.56759	up	--	--	Molecular Function: ATP transmembrane transporter activity (GO:0005347);; Cellular Component: integral component of membrane (GO:0016021);;	K14684|1.3e-150|ats:109780029|K14684 solute carrier family 25 (mitochondrial phosphate transporter), member 23/24/25/41 | (RefSeq) LOC109780029; adenine nucleotide transporter BT1, chloroplastic/amyloplastic/mitochondrial-like	--	[C]	Energy production and conversion	Mitochondrial carrier protein	Adenine nucleotide transporter BT1, chloroplastic/amyloplastic/mitochondrial OS=Zea mays OX=4577 GN=BT1 PE=1 SV=1	S	Function unknown	hypothetical protein OsI_06284 [Oryza sativa Indica Group]
BGIOSGA019452	278	350	360	14	6	17	8.16285	10.0775	10.7738	0.422627	0.137029	0.508588	3.71532e-33	-3.91706	down	[G]	Carbohydrate transport and metabolism	Molecular Function: aldose 1-epimerase activity (GO:0004034);; Biological Process: hexose metabolic process (GO:0019318);; Molecular Function: carbohydrate binding (GO:0030246);;	K01785|2.2e-188|dosa:Os10t0155500-01|K01785 aldose 1-epimerase [EC:5.1.3.3] | (RefSeq) Os10g0155500; Similar to Aldose 1-epimerase-like protein.	Glycolysis / Gluconeogenesis (ko00010);; Galactose metabolism (ko00052)	[G]	Carbohydrate transport and metabolism	Aldose 1-epimerase	--	G	Carbohydrate transport and metabolism	hypothetical protein OsI_19092 [Oryza sativa Indica Group]
Oryza_sativa_newGene_3420	94	58	57	2	0	8	3.04272	1.74599	1.77317	0.062511	0	0.229869	1.7913e-05	-2.35851	down	--	--	Cellular Component: integral component of membrane (GO:0016021);;	--	--	--	--	--	--	--	--	fertility restorer-like [Oryza sativa Japonica Group]
Oryza_sativa_newGene_5828	33	26	22	79	92	63	1.23048	0.941003	0.803806	3.08329	3.05204	2.36877	0.000375162	1.5178	up	--	--	--	--	--	--	--	--	--	L	Replication, recombination and repair	hypothetical protein BP01DRAFT_410925, partial [Aspergillus saccharolyticus JOP 1030-1]
BGIOSGA003782	254	255	203	343	556	433	31.7838	31.2765	25.9346	45.5105	62.3598	55.2123	0.000535598	1.09645	up	--	--	Cellular Component: Sec61 translocon complex (GO:0005784);; Biological Process: intracellular protein transport (GO:0006886);; Cellular Component: integral component of membrane (GO:0016021);;	K09481|1.1e-21|dosa:Os01t0565900-01|K09481 protein transport protein SEC61 subunit beta | (RefSeq) Os01g0565900; Similar to Protein transport protein Sec61 beta subunit.	Protein export (ko03060);; Protein processing in endoplasmic reticulum (ko04141);; Phagosome (ko04145)	[O]	Posttranslational modification, protein turnover, chaperones	Sec61beta family	Protein transport protein Sec61 subunit beta OS=Arabidopsis thaliana OX=3702 GN=At2g45070 PE=1 SV=1	U	Intracellular trafficking, secretion, and vesicular transport	hypothetical protein OsI_02463 [Oryza sativa Indica Group]
BGIOSGA016208	975	998	831	75	41	23	20.5022	20.5651	17.804	1.66247	0.758427	0.489889	8.60351e-30	-3.61412	down	--	--	Molecular Function: protein binding (GO:0005515);;	K10268|9.5e-230|dosa:Os04t0370500-00|K10268 F-box and leucine-rich repeat protein 2/20 | (RefSeq) Os04g0370500; Similar to OSIGBa0107E14.10 protein.	--	--	--	F-box domain	--	S	Function unknown	hypothetical protein OsI_15537 [Oryza sativa Indica Group]
BGIOSGA034330	94	100	107	20	14	18	2.16531	2.2636	2.49798	0.483469	0.284586	0.403167	1.74823e-07	-1.9587	down	--	--	Molecular Function: protein binding (GO:0005515);;	--	--	--	--	F-box domain	Putative F-box/LRR-repeat protein At3g49150 OS=Arabidopsis thaliana OX=3702 GN=At3g49150 PE=4 SV=2	--	--	hypothetical protein OsI_35482 [Oryza sativa Indica Group]
BGIOSGA010485	182	144	95	17	22	16	33.0302	25.5865	17.4278	3.16792	3.44713	2.91576	4.57935e-08	-2.20688	down	--	--	--	--	--	--	--	--	--	--	--	hypothetical protein OsI_12157 [Oryza sativa Indica Group]
BGIOSGA027541	1274	1125	908	311	230	249	37.5146	32.4677	27.2198	9.67887	6.05263	7.44237	3.9395e-18	-1.73587	down	[M]	Cell wall/membrane/envelope biogenesis	Molecular Function: catalytic activity (GO:0003824);;	K09753|3.5e-61|dzi:111281115|K09753 cinnamoyl-CoA reductase [EC:1.2.1.44] | (RefSeq) cinnamoyl-CoA reductase 1-like isoform X1	Phenylpropanoid biosynthesis (ko00940)	[V]	Defense mechanisms	NAD dependent epimerase/dehydratase family	Cinnamoyl-CoA reductase 1 OS=Arabidopsis thaliana OX=3702 GN=CCR1 PE=1 SV=1	M	Cell wall/membrane/envelope biogenesis	hypothetical protein OsI_28059 [Oryza sativa Indica Group]
BGIOSGA021121	42	48	90	240	2696	1053	2.05589	2.27887	4.46922	12.4303	118.406	52.5789	0.000292117	2.1091	up	--	--	Biological Process: response to acid chemical (GO:0001101);; Molecular Function: molecular_function (GO:0003674);; Molecular Function: enzyme inhibitor activity (GO:0004857);; Molecular Function: protein phosphatase inhibitor activity (GO:0004864);; Molecular Function: binding (GO:0005488);; Molecular Function: protein binding (GO:0005515);; Cellular Component: cellular_component (GO:0005575);; C…	K14496|2.2e-111|dosa:Os06t0527800-01|K14496 abscisic acid receptor PYR/PYL family | (RefSeq) Os06g0527800; Similar to Polyketide cyclase.	MAPK signaling pathway - plant (ko04016);; Plant hormone signal transduction (ko04075)	--	--	Polyketide cyclase / dehydrase and lipid transport	Abscisic acid receptor PYL3 OS=Oryza sativa subsp. japonica OX=39947 GN=PYL3 PE=1 SV=1	S	Function unknown	ABA receptor 3 [Oryza sativa Indica Group]
BGIOSGA002958	318	261	448	2940	3185	1739	10.9842	8.82187	15.7675	107.463	98.4724	61.1458	6.93779e-24	2.92337	up	--	--	--	--	--	--	--	--	B-box zinc finger protein 22 OS=Arabidopsis thaliana OX=3702 GN=BBX22 PE=1 SV=2	S	Function unknown	hypothetical protein OsI_00804 [Oryza sativa Indica Group]
Oryza_sativa_newGene_5725	0	0	0	79	57	71	0	0	0	3.94272	2.41468	3.41646	1.61209e-18	4.20792	up	--	--	Molecular Function: nucleic acid binding (GO:0003676);; Biological Process: DNA integration (GO:0015074);;	--	--	--	--	--	--	S	Function unknown	uncharacterized protein LOC112939019 [Oryza sativa Japonica Group]
BGIOSGA027472	0	0	0	109	105	96	0	0	0	9.06242	7.3496	7.6925	3.64173e-26	4.81969	up	--	--	--	--	--	--	--	--	--	S	Function unknown	hypothetical protein OsI_28206 [Oryza sativa Indica Group]
BGIOSGA001513	119	120	110	21	35	21	4.51869	4.47695	4.25403	0.829467	1.16474	0.7824	7.18309e-05	-1.61256	down	--	--	--	--	--	--	--	--	--	--	--	hypothetical protein OsI_02213 [Oryza sativa Indica Group]
BGIOSGA031137	147	172	158	403	307	376	11.5383	13.2469	12.6643	33.5296	21.592	30.1216	2.62019e-12	1.39121	up	--	--	--	--	--	--	--	--	--	--	--	hypothetical protein OsI_32137 [Oryza sativa Indica Group]
BGIOSGA030203	46	73	49	139	95	126	1.13464	1.7576	1.22193	3.6168	2.09528	3.16229	0.000869971	1.21203	up	--	--	--	--	--	--	--	Domain of unknown function (DUF4216)	--	--	--	hypothetical protein OsI_30444 [Oryza sativa Indica Group]
BGIOSGA014977	0	0	0	627	398	532	0	0	0	14.3263	7.68353	11.6875	2.00815e-71	6.99587	up	--	--	Molecular Function: DNA binding (GO:0003677);;	--	--	--	--	No apical meristem-associated C-terminal domain	--	--	--	hypothetical protein OsI_16136 [Oryza sativa Indica Group]
BGIOSGA021914	2	2	1	419	287	732	0.072103	0.1121	0.032996	31.8991	18.4887	53.684	1.3572e-49	5.97841	up	--	--	Cellular Component: integral component of membrane (GO:0016021);;	--	--	--	--	--	--	S	Function unknown	hypothetical protein OsI_21655 [Oryza sativa Indica Group]
BGIOSGA020321	99	184	173	283	410	262	4.91944	8.96527	8.7759	14.9055	18.243	13.2643	0.00171123	1.19803	up	--	--	--	--	--	--	--	Protein of unknown function (DUF1639)	--	S	Function unknown	hypothetical protein OsI_20891 [Oryza sativa Indica Group]
BGIOSGA007142	222	189	107	22	58	44	17.7494	14.778	8.71583	1.78795	4.1047	3.50692	0.00413782	-1.40539	down	--	--	--	--	--	--	--	--	--	--	--	hypothetical protein OsI_05830 [Oryza sativa Indica Group]
BGIOSGA028327	128	120	119	221	236	302	13.3394	12.2667	12.6448	24.4295	22.0885	32.1346	2.64186e-06	1.23623	up	--	--	Molecular Function: ATP binding (GO:0005524);;	K18798|4.0e-47|osa:4345118|K18798 peroxisome-assembly ATPase [EC:3.6.4.7] | (RefSeq) lactation elevated protein 1	--	[R]	General function prediction only	--	--	S	Function unknown	hypothetical protein OsI_28512 [Oryza sativa Indica Group]
BGIOSGA040489	8	7	14	33	53	30	0.245902	0.2175	0.430257	1.07496	1.49533	0.944319	0.00452444	1.58737	up	--	--	Molecular Function: transcription factor activity, sequence-specific DNA binding (GO:0003700);; Cellular Component: nucleus (GO:0005634);; Molecular Function: sequence-specific DNA binding (GO:0043565);;	K20854|2.2e-17|sita:101768586|K20854 hydroxyproline O-galactosyltransferase HPGT [EC:2.4.1.-] | (RefSeq) hydroxyproline O-galactosyltransferase HPGT1	--	--	--	WRKY DNA -binding domain	Probable WRKY transcription factor 53 OS=Arabidopsis thaliana OX=3702 GN=WRKY53 PE=1 SV=1	K	Transcription	TPA_inf: WRKY transcription factor 69 [Oryza sativa (indica cultivar-group)] [Oryza sativa Indica Group]
BGIOSGA031017	71	64	42	116	937	482	2.20111	1.93845	1.30218	3.7954	26.0374	15.2253	1.22578e-06	2.42457	up	[G]	Carbohydrate transport and metabolism	Molecular Function: chitinase activity (GO:0004568);; Biological Process: carbohydrate metabolic process (GO:0005975);; Biological Process: chitin catabolic process (GO:0006032);; Biological Process: cell wall macromolecule catabolic process (GO:0016998);;	K20547|1.8e-54|dzi:111308707|K20547 basic endochitinase B [EC:3.2.1.14] | (RefSeq) endochitinase 1-like	Amino sugar and nucleotide sugar metabolism (ko00520);; MAPK signaling pathway - plant (ko04016)	[R]	General function prediction only	Chitinase class I	Chitinase-like protein 1 OS=Arabidopsis thaliana OX=3702 GN=CTL1 PE=1 SV=1	G	Carbohydrate transport and metabolism	chitinase-like protein 1 [Oryza sativa Japonica Group]
BGIOSGA001791	534	530	390	555	1474	870	57.7539	56.1255	42.8675	63.3513	142.508	95.6117	0.0066556	1.13122	up	--	--	--	--	--	--	--	Late embryogenesis abundant protein	Indole-3-acetic acid-induced protein ARG2 OS=Vigna radiata var. radiata OX=3916 GN=ARG2 PE=2 SV=1	S	Function unknown	protein SENESCENCE-ASSOCIATED GENE 21, mitochondrial [Oryza sativa Japonica Group]
BGIOSGA036042	0	0	1	61	101	345	0	0	0.052416	8.1925	11.5111	45.0729	2.90382e-15	3.96361	up	--	--	Molecular Function: serine-type endopeptidase inhibitor activity (GO:0004867);; Biological Process: response to wounding (GO:0009611);;	--	--	--	--	Potato inhibitor I family	Subtilisin-chymotrypsin inhibitor WSCI OS=Triticum aestivum OX=4565 PE=1 SV=2	--	--	hypothetical protein OsI_38644 [Oryza sativa Indica Group]
BGIOSGA008681	503	506	372	163	155	212	4.91974	4.85168	3.70727	1.68631	1.35506	2.10499	5.3572e-05	-1.05549	down	[T]	Signal transduction mechanisms	Molecular Function: protein serine/threonine kinase activity (GO:0004674);; Molecular Function: ATP binding (GO:0005524);; Cellular Component: integral component of membrane (GO:0016021);;	K13437|1.8e-132|osa:107276510|K13437 receptor kinase-like protein | (RefSeq) probable LRR receptor-like serine/threonine-protein kinase At3g47570	Plant-pathogen interaction (ko04626)	--	--	Protein tyrosine and serine/threonine kinase	Receptor kinase-like protein Xa21 OS=Oryza sativa subsp. indica OX=39946 GN=XA21 PE=1 SV=1	T	Signal transduction mechanisms	hypothetical protein OsI_08194 [Oryza sativa Indica Group]
BGIOSGA024581	89	121	98	0	0	2	4.91527	6.53204	5.49859	0	0	0.080774	2.82576e-18	-4.06224	down	--	--	--	--	--	--	--	FBD	--	S	Function unknown	hypothetical protein OsI_25422 [Oryza sativa Indica Group]
BGIOSGA011134	53	100	75	133	219	130	2.75089	5.126	3.96509	7.35973	10.2179	6.91157	0.00810286	1.168	up	--	--	--	--	--	--	--	--	--	S	Function unknown	formin-like protein 5 [Oryza sativa Japonica Group]
BGIOSGA020521	40	47	48	44	368	209	0.982266	1.14435	1.21411	1.15824	8.21958	5.30151	0.00198823	1.72243	up	--	--	Cellular Component: integral component of membrane (GO:0016021);;	--	--	--	--	--	Putative UPF0496 protein 2 OS=Oryza sativa subsp. indica OX=39946 GN=OsI_023618 PE=3 SV=2	S	Function unknown	hypothetical protein OsI_24490 [Oryza sativa Indica Group]
BGIOSGA032645	9	23	30	67	2940	1266	0.267072	0.673412	0.907858	2.13071	79.5448	38.942	0.00960008	1.55442	up	--	--	Cellular Component: nucleus (GO:0005634);; Molecular Function: protein heterodimerization activity (GO:0046982);;	K08066|4.6e-191|dosa:Os10t0191900-00|K08066 nuclear transcription factor Y, gamma | (RefSeq) Os10g0191900; Histone-fold domain containing protein.	--	[K]	Transcription	Core histone H2A/H2B/H3/H4	--	K	Transcription	hypothetical protein OsI_32963 [Oryza sativa Indica Group]
BGIOSGA006055	1818	2995	2778	981	965	1013	94.2866	152.19	146.683	53.761	44.7451	53.4177	1.09643e-05	-1.04027	down	[M]	Cell wall/membrane/envelope biogenesis	--	K03098|1.5e-112|dosa:Os02t0612900-01|K03098 apolipoprotein D and lipocalin family protein | (RefSeq) Os02g0612900; Similar to Temperature stress-induced lipocalin.	--	[M]	Cell wall/membrane/envelope biogenesis	Lipocalin-like domain	Temperature-induced lipocalin-1 OS=Arabidopsis thaliana OX=3702 GN=TIL PE=1 SV=1	M	Cell wall/membrane/envelope biogenesis	temperature-induced lipocalin-1 [Oryza sativa Japonica Group]
BGIOSGA016148	0	0	0	101	112	225	0	0	0	2.76143	2.5869	5.90354	1.43813e-25	4.85464	up	--	--	--	--	--	--	--	Domain of unknown function (DUF4216)	--	--	--	hypothetical protein OsI_15398 [Oryza sativa Indica Group]
BGIOSGA029975	3	8	0	186	158	220	0.035716	0.097644	0	2.75785	1.98576	3.13987	5.40224e-28	4.48592	up	--	--	Molecular Function: protein binding (GO:0005515);;	--	--	--	--	Leucine Rich repeats (2 copies)	--	S	Function unknown	hypothetical protein OsI_30909 [Oryza sativa Indica Group]
BGIOSGA032544	32	30	31	6	5	5	3.57398	3.22404	3.45115	0.652906	0.457696	0.47496	0.00672553	-1.54544	down	--	--	--	--	--	--	--	--	--	--	--	hypothetical protein OsI_32767 [Oryza sativa Indica Group]
BGIOSGA004852	46	103	173	309	462	184	2.66393	5.86221	10.2537	19.0694	24.0878	10.923	0.00434133	1.44605	up	--	--	Molecular Function: DNA binding (GO:0003677);; Cellular Component: nucleus (GO:0005634);;	K08869|1.9e-26|cre:CHLREDRAFT_165812|K08869 aarF domain-containing kinase | (RefSeq) predicted protein	--	[O]	Posttranslational modification, protein turnover, chaperones	Myb-like DNA-binding domain	Transcription factor DIVARICATA OS=Antirrhinum majus OX=4151 GN=DIVARICATA PE=2 SV=1	K	Transcription	MYB transcription factor [Oryza sativa Indica Group]
BGIOSGA034624	71	136	109	340	143	280	1.65562	3.10382	2.58873	8.39613	2.97589	6.64962	0.000934605	1.31549	up	[T]	Signal transduction mechanisms	Molecular Function: protein serine/threonine kinase activity (GO:0004674);; Molecular Function: ATP binding (GO:0005524);; Biological Process: signal transduction (GO:0007165);;	K07198|3.1e-248|dosa:Os11t0113700-01|K07198 5'-AMP-activated protein kinase, catalytic alpha subunit [EC:2.7.11.11] | (RefSeq) Os11g0113700, CALCINEURIN_B-LIKE_PROTEIN-INTERACTING_PROTEIN_KINASE_15, CIPK15; Serine/threonine protein kinase, Abiotic stresses	--	[T]	Signal transduction mechanisms	Protein kinase domain	CBL-interacting protein kinase 15 OS=Oryza sativa subsp. japonica OX=39947 GN=CIPK15 PE=2 SV=1	T	Signal transduction mechanisms	CBL-interacting protein kinase 15 [Oryza sativa Japonica Group]
BGIOSGA030061	0	0	0	28	81	33	0	0	0	1.67155	4.06723	1.85186	1.72355e-08	3.02422	up	--	--	Cellular Component: integral component of membrane (GO:0016021);;	--	--	--	--	--	--	--	--	hypothetical protein OsI_30733 [Oryza sativa Indica Group]
BGIOSGA013697	9	24	40	69	102	72	0.139733	0.389266	0.689121	1.2258	1.54118	1.23706	0.00692567	1.47416	up	[T]	Signal transduction mechanisms	Molecular Function: protein kinase activity (GO:0004672);; Molecular Function: calcium ion binding (GO:0005509);; Molecular Function: ATP binding (GO:0005524);;	K13412|0.0e+00|dosa:Os03t0788500-01|K13412 calcium-dependent protein kinase [EC:2.7.11.1] | (RefSeq) Os03g0788500, CDPK10, CALCIUM-DEPENDENT_PROTEIN_KINASE_10; Similar to Calcium-dependent protein kinase 2.	Plant-pathogen interaction (ko04626)	[T]	Signal transduction mechanisms	Protein kinase domain	Calcium-dependent protein kinase 10 OS=Oryza sativa subsp. japonica OX=39947 GN=CPK10 PE=2 SV=1	T	Signal transduction mechanisms	unnamed protein product, partial [Oryza sativa Japonica Group]
BGIOSGA016861	210	215	283	345	527	389	10.1306	10.1917	13.9053	17.644	22.8063	19.1077	0.00170646	1.02629	up	--	--	--	--	--	[K]	Transcription	Myb/SANT-like DNA-binding domain	--	K	Transcription	hypothetical protein OsI_16838 [Oryza sativa Indica Group]
BGIOSGA007573	672	513	400	964	1431	1316	10.1037	7.54537	6.11091	15.3209	19.2318	20.1242	1.36276e-06	1.39728	up	--	--	Biological Process: protein transport (GO:0015031);;	K19476|1.5e-55|mus:103989415|K19476 vacuolar protein sorting-associated protein IST1 | (RefSeq) uncharacterized protein LOC103989415	Endocytosis (ko04144)	[Z]	Cytoskeleton	Regulator of Vps4 activity in the MVB pathway	--	S	Function unknown	hypothetical protein OsI_05930 [Oryza sativa Indica Group]
BGIOSGA019722	272	176	158	0	5	5	34.5164	21.8808	20.4365	0	0.515239	0.552663	4.70829e-21	-4.07014	down	--	--	Cellular Component: integral component of membrane (GO:0016021);;	K01188|1.0e-08|dosa:Os05t0366600-01|K01188 beta-glucosidase [EC:3.2.1.21] | (RefSeq) Os05g0366600; Similar to Hydroxyisourate hydrolase.	Cyanoamino acid metabolism (ko00460);; Starch and sucrose metabolism (ko00500);; Phenylpropanoid biosynthesis (ko00940)	--	--	--	Beta-glucosidase 22 OS=Oryza sativa subsp. japonica OX=39947 GN=BGLU22 PE=2 SV=1	--	--	hypothetical protein OsI_19670 [Oryza sativa Indica Group]
BGIOSGA029731	7	15	10	56	51	59	0.43036	0.911844	0.600376	3.67916	2.82556	3.72214	7.69813e-06	2.05612	up	--	--	Cellular Component: integral component of membrane (GO:0016021);; Molecular Function: transmembrane transporter activity (GO:0022857);;	--	--	--	--	--	WAT1-related protein At4g28040 OS=Arabidopsis thaliana OX=3702 GN=At4g28040 PE=2 SV=1	--	--	hypothetical protein OsI_31433 [Oryza sativa Indica Group]
BGIOSGA013083	53	137	130	182	2583	1020	5.52553	13.9705	13.8429	20.1301	242.033	108.659	0.00755168	1.65102	up	--	--	Cellular Component: integral component of membrane (GO:0016021);;	--	--	--	--	NADH-ubiquinone reductase complex 1 MLRQ subunit	--	--	--	uncharacterized protein LOC4333398 [Oryza sativa Japonica Group]
BGIOSGA004181	745	966	1365	1626	2087	1747	30.6372	38.9544	57.2064	70.7111	76.7974	73.1189	0.000612457	1.02783	up	--	--	--	K22376|1.7e-25|dcr:108196719|K22376 E3 ubiquitin-protein ligase KCMF1 [EC:2.3.2.27] | (RefSeq) protein DEHYDRATION-INDUCED 19 homolog 4-like	--	--	--	Stress-induced protein Di19, C-terminal	Protein DEHYDRATION-INDUCED 19 homolog 3 OS=Oryza sativa subsp. japonica OX=39947 GN=DI19-3 PE=2 SV=1	S	Function unknown	hypothetical protein OsI_03221 [Oryza sativa Indica Group]
BGIOSGA035717	27	13	43	109	4652	1566	0.920461	0.414007	1.5138	4.01261	145.319	55.6451	0.00955242	1.55407	up	--	--	Molecular Function: enzyme inhibitor activity (GO:0004857);; Biological Process: carbohydrate metabolic process (GO:0005975);; Biological Process: defense response to fungus (GO:0050832);;	K01183|8.2e-160|dosa:Os11t0701100-01|K01183 chitinase [EC:3.2.1.14] | (RefSeq) Os11g0701100; Similar to Class III chitinase homologue (OsChib3H-h) (Fragment).	Amino sugar and nucleotide sugar metabolism (ko00520)	[M]	Cell wall/membrane/envelope biogenesis	Glycosyl hydrolases family 18	Xylanase inhibitor protein 2 OS=Oryza sativa subsp. japonica OX=39947 GN=Chib3H-h PE=1 SV=1	G	Carbohydrate transport and metabolism	hypothetical protein OsI_37039 [Oryza sativa Indica Group]
BGIOSGA035949	185	192	208	722	476	625	4.20188	4.26788	4.79425	17.3495	9.66413	14.4368	3.88866e-21	1.82185	up	[M]	Cell wall/membrane/envelope biogenesis	Cellular Component: Golgi membrane (GO:0000139);; Biological Process: pectin biosynthetic process (GO:0045489);; Molecular Function: polygalacturonate 4-alpha-galacturonosyltransferase activity (GO:0047262);; Biological Process: cell wall organization (GO:0071555);;	K20867|4.0e-267|dosa:Os12t0578500-01|K20867 galacturonosyltransferase 12/13/14/15 [EC:2.4.1.-] | (RefSeq) Os12g0578500; Glycosyl transferase, family 8 protein.	--	--	--	Glycosyl transferase family 8	Probable galacturonosyltransferase 14 OS=Arabidopsis thaliana OX=3702 GN=GAUT14 PE=2 SV=1	G	Carbohydrate transport and metabolism	hypothetical protein OsI_38869 [Oryza sativa Indica Group]
Oryza_sativa_newGene_5288	114	128	48	13	8	12	1.46354	1.62964	0.624107	0.173853	0.086558	0.154138	7.1684e-06	-2.15366	down	--	--	--	--	--	--	--	--	--	--	--	hypothetical protein DAI22_09g100900 [Oryza sativa Japonica Group]
BGIOSGA035572	22	29	51	60	726	269	0.701911	0.919947	1.6957	2.08591	21.4982	9.04924	2.17447e-05	2.3046	up	--	--	Biological Process: metal ion transport (GO:0030001);; Molecular Function: metal ion binding (GO:0046872);;	--	--	--	--	--	Protein PYRICULARIA ORYZAE RESISTANCE 21 OS=Oryza sativa subsp. indica OX=39946 GN=PI21 PE=4 SV=1	S	Function unknown	hypothetical protein OsI_36744 [Oryza sativa Indica Group]
BGIOSGA001158	5	21	28	33	393	229	0.133301	0.630816	0.853697	1.0466	10.767	7.15415	9.33225e-05	2.20499	up	[GI]	Carbohydrate transport and metabolism;; Lipid transport and metabolism	Molecular Function: pectinesterase activity (GO:0030599);; Biological Process: cell wall modification (GO:0042545);; Molecular Function: aspartyl esterase activity (GO:0045330);; Biological Process: pectin catabolic process (GO:0045490);;	K01051|8.1e-188|dosa:Os01t0634600-00|K01051 pectinesterase [EC:3.1.1.11] | (RefSeq) Os01g0634600; Pectin lyase fold/virulence factor domain containing protein.	Pentose and glucuronate interconversions (ko00040)	--	--	Pectinesterase	Putative pectinesterase 11 OS=Arabidopsis thaliana OX=3702 GN=PME11 PE=3 SV=1	G	Carbohydrate transport and metabolism	hypothetical protein OsI_02978 [Oryza sativa Indica Group]
BGIOSGA005827	165	154	156	47	41	33	3.75474	3.43972	3.60685	1.12143	0.834768	0.757853	8.81168e-07	-1.55337	down	--	--	--	K14400|1.3e-39|aof:109844760|K14400 pre-mRNA cleavage complex 2 protein Pcf11 | (RefSeq) LOW QUALITY PROTEIN: uncharacterized protein LOC109844760	mRNA surveillance pathway (ko03015)	--	--	Plant mobile domain	Serine/threonine-protein phosphatase 7 long form homolog OS=Arabidopsis thaliana OX=3702 GN=MAIL3 PE=2 SV=1	--	--	hypothetical protein OsI_08503 [Oryza sativa Indica Group]
BGIOSGA036110	187	181	187	48	40	68	1.85557	1.76104	1.89126	0.495144	0.354995	0.687487	6.01471e-06	-1.43371	down	--	--	Molecular Function: ADP binding (GO:0043531);;	K15078|6.0e-56|tcc:18614561|K15078 structure-specific endonuclease subunit SLX1 [EC:3.6.1.-] | (RefSeq) putative disease resistance protein RGA3	--	[T]	Signal transduction mechanisms	NB-ARC domain	Putative disease resistance protein RGA1 OS=Solanum bulbocastanum OX=147425 GN=RGA1 PE=2 SV=2	S	Function unknown	hypothetical protein OsI_38493 [Oryza sativa Indica Group]
BGIOSGA034259	0	0	0	80	49	65	0	0	0	0.939567	0.486406	0.73834	7.47808e-17	4.05586	up	[R]	General function prediction only	Biological Process: defense response (GO:0006952);; Molecular Function: ADP binding (GO:0043531);;	K13457|0.0e+00|osa:9267892|K13457 disease resistance protein RPM1 | (RefSeq) disease resistance protein RPM1	Plant-pathogen interaction (ko04626)	[T]	Signal transduction mechanisms	NB-ARC domain	Disease resistance protein RPM1 OS=Arabidopsis thaliana OX=3702 GN=RPM1 PE=1 SV=1	S	Function unknown	hypothetical protein OsI_35599 [Oryza sativa Indica Group]
BGIOSGA026092	43	60	57	100	1278	730	0.969341	1.32442	1.30889	2.3859	25.9879	16.876	0.00137063	1.90967	up	--	--	Biological Process: cellulose microfibril organization (GO:0010215);; Cellular Component: integral component of membrane (GO:0016021);; Cellular Component: anchored component of membrane (GO:0031225);;	--	--	--	--	COBRA-like protein	COBRA-like protein 1 OS=Oryza sativa subsp. japonica OX=39947 GN=BC1L6 PE=2 SV=1	S	Function unknown	hypothetical protein OsI_26785 [Oryza sativa Indica Group]
BGIOSGA036828	352	341	331	2304	1985	2133	4.0223	3.82154	3.8488	27.8804	20.3148	24.8391	2.22715e-119	2.86511	up	--	--	Molecular Function: ribonuclease P activity (GO:0004526);; Cellular Component: nucleus (GO:0005634);; Biological Process: tRNA processing (GO:0008033);;	K03539|0.0e+00|osa:4349529|K03539 ribonuclease P/MRP protein subunit RPP1 [EC:3.1.26.5] | (RefSeq) uncharacterized protein LOC4349529 isoform X1	Ribosome biogenesis in eukaryotes (ko03008);; RNA transport (ko03013)	[J]	Translation, ribosomal structure and biogenesis	RNase P subunit p30	Protein GAMETOPHYTE DEFECTIVE 1 OS=Arabidopsis thaliana OX=3702 GN=GAF1 PE=1 SV=1	J	Translation, ribosomal structure and biogenesis	hypothetical protein OsI_37104 [Oryza sativa Indica Group]
BGIOSGA011229	46	71	57	128	88	104	3.87738	5.85614	4.90159	11.4359	6.61609	8.90349	0.006687	1.01818	up	--	--	--	--	--	--	--	--	--	--	--	hypothetical protein OsI_10485 [Oryza sativa Indica Group]
BGIOSGA022675	35	46	49	0	0	0	0.54786	0.705682	0.797346	0	0	0	7.72612e-09	-3.06053	down	--	--	--	--	--	--	--	--	--	--	--	hypothetical protein OsI_22492 [Oryza sativa Indica Group]
BGIOSGA016232	145	100	102	0	0	0	14.737	9.94523	10.4735	0	0	0	2.37434e-21	-4.44989	down	--	--	--	--	--	--	--	--	--	--	--	hypothetical protein OsI_15595 [Oryza sativa Indica Group]
BGIOSGA036903	220	193	154	47	75	72	14.0161	12.0432	10.0024	3.17014	4.24681	4.64788	0.00315901	-1.12603	down	[FGR]	Nucleotide transport and metabolism;; Carbohydrate transport and metabolism;; General function prediction only	Molecular Function: catalytic activity (GO:0003824);;	K01522|1.1e-78|osa:4351354|K01522 bis(5'-adenosyl)-triphosphatase [EC:3.6.1.29] | (RefSeq) bis(5'-adenosyl)-triphosphatase	Purine metabolism (ko00230)	[FR]	Nucleotide transport and metabolism;; General function prediction only	HIT domain	Bifunctional bis(5'-adenosyl)-triphosphatase/adenylylsulfatase FHIT OS=Arabidopsis thaliana OX=3702 GN=FHIT PE=1 SV=1	FG	Nucleotide transport and metabolism;; Carbohydrate transport and metabolism	hypothetical protein OsI_37271 [Oryza sativa Indica Group]
Oryza_sativa_newGene_6064	0	0	0	96	43	62	0	0	0	3.01024	1.23847	1.60109	1.73707e-15	3.93218	up	--	--	--	--	--	--	--	Transposase-associated domain	--	S	Function unknown	uncharacterized protein LOC107281789 [Oryza sativa Japonica Group]
BGIOSGA018507	154	114	67	22	22	33	1.73213	1.2488	0.76726	0.258875	0.213609	0.369715	0.00119551	-1.50532	down	[R]	General function prediction only	Biological Process: defense response (GO:0006952);; Molecular Function: ADP binding (GO:0043531);;	K13457|2.4e-133|ats:109760587|K13457 disease resistance protein RPM1 | (RefSeq) LOC109760587; putative disease resistance RPP13-like protein 3	Plant-pathogen interaction (ko04626)	[T]	Signal transduction mechanisms	NB-ARC domain	Disease resistance protein RGA5 OS=Oryza sativa subsp. japonica OX=39947 GN=RGA5 PE=1 SV=1	S	Function unknown	hypothetical protein OsI_19026 [Oryza sativa Indica Group]
BGIOSGA015855	5433	4037	3119	2181	1264	1480	245.457	178.714	143.484	104.149	51.0423	68.0209	0.000208815	-1.03681	down	--	--	Molecular Function: protein binding (GO:0005515);;	--	--	--	--	PB1 domain	--	S	Function unknown	hypothetical protein OsI_14763 [Oryza sativa Indica Group]
BGIOSGA018154	5	7	5	238	367	145	0.235735	0.328056	0.232415	12.8508	16.758	7.51369	8.14936e-26	4.35964	up	[T]	Signal transduction mechanisms	Molecular Function: calcium ion binding (GO:0005509);;	K13448|1.1e-86|dosa:Os05t0380900-01|K13448 calcium-binding protein CML | (RefSeq) Os05g0380900; Similar to Polcalcin Jun o 2 (Calcium-binding pollen allergen Jun o 2).	Plant-pathogen interaction (ko04626)	[T]	Signal transduction mechanisms	EF hand	Probable calcium-binding protein CML15 OS=Oryza sativa subsp. japonica OX=39947 GN=CML15 PE=2 SV=1	DTZ	Cell cycle control, cell division, chromosome partitioning;; Signal transduction mechanisms;; Cytoskeleton	hypothetical protein OsI_19761 [Oryza sativa Indica Group]
BGIOSGA029457	376	210	204	86	49	80	7.50961	4.10844	4.12943	1.81065	0.865637	1.62077	0.000147275	-1.43141	down	--	--	--	--	--	--	--	--	--	--	--	hypothetical protein OsI_32000 [Oryza sativa Indica Group]
BGIOSGA006680	12837	11746	10297	3389	2771	3591	498.112	446.594	406.829	138.981	96.1524	141.704	1.48041e-27	-1.54751	down	[J]	Translation, ribosomal structure and biogenesis	Molecular Function: structural constituent of ribosome (GO:0003735);; Biological Process: translation (GO:0006412);; Cellular Component: cytosolic small ribosomal subunit (GO:0022627);;	K02984|6.2e-143|dosa:Os02t0287000-01|K02984 small subunit ribosomal protein S3Ae | (RefSeq) Os02g0287000; Similar to 40S ribosomal protein S3a (CYC07 protein).	Ribosome (ko03010)	[J]	Translation, ribosomal structure and biogenesis	Ribosomal S3Ae family	40S ribosomal protein S3a OS=Oryza sativa subsp. japonica OX=39947 GN=RPS3A PE=2 SV=2	J	Translation, ribosomal structure and biogenesis	40S ribosomal protein S3a-like [Oryza sativa Japonica Group]
BGIOSGA030177	172	125	103	9	30	4	11.1041	7.8883	6.74224	0.575475	1.71944	0.220446	0.00053827	-1.90796	down	--	--	--	--	--	--	--	--	--	--	--	hypothetical protein OsI_30512 [Oryza sativa Indica Group]
BGIOSGA036846	160	233	227	485	342	405	4.52209	6.4712	6.55225	14.5562	8.67037	11.6945	1.77509e-06	1.18109	up	--	--	--	--	--	--	--	--	--	S	Function unknown	hypothetical protein OsI_37133 [Oryza sativa Indica Group]
BGIOSGA031053	152	86	109	20	12	14	2.64844	1.46153	1.93368	0.355867	0.173165	0.23068	1.07971e-07	-2.18913	down	--	--	Cellular Component: nuclear chromosome (GO:0000228);; Biological Process: synapsis (GO:0007129);; Biological Process: megasporogenesis (GO:0009554);; Biological Process: microsporogenesis (GO:0009556);;	K03294|8.7e-20|apro:F751_6501|K03294 basic amino acid/polyamine antiporter, APA family | (RefSeq) putative amino acid permease YfnA	--	[B]	Chromatin structure and dynamics	HORMA domain	Meiosis-specific protein PAIR2 OS=Oryza sativa subsp. japonica OX=39947 GN=PAIR2 PE=2 SV=1	S	Function unknown	hypothetical protein OsI_31963 [Oryza sativa Indica Group]
BGIOSGA035287	0	0	0	37	32	36	0	0	0	1.51429	1.13559	1.45039	1.39304e-09	3.18102	up	[PR]	Inorganic ion transport and metabolism;; General function prediction only	Molecular Function: ATP binding (GO:0005524);;	K02049|4.1e-06|zju:107408376|K02049 NitT/TauT family transport system ATP-binding protein | (RefSeq) uncharacterized protein LOC107408376	--	[Q]	Secondary metabolites biosynthesis, transport and catabolism	ABC transporter	ABC transporter I family member 11, chloroplastic OS=Arabidopsis thaliana OX=3702 GN=ABCI11 PE=2 SV=1	P	Inorganic ion transport and metabolism	hypothetical protein OsI_36152 [Oryza sativa Indica Group]
Oryza_sativa_newGene_4820	1602	1835	1820	141	117	156	12.5283	13.7578	14.3299	1.16779	0.811073	1.20604	8.5176e-92	-3.31075	down	--	--	--	--	--	--	--	--	--	--	--	OSJNBa0095E20.13 [Oryza sativa Japonica Group]
BGIOSGA030728	51	62	129	254	173	170	0.582955	0.694862	1.52296	3.11842	1.7907	2.00592	0.00235372	1.31769	up	[T]	Signal transduction mechanisms	Molecular Function: ATP binding (GO:0005524);; Cellular Component: integral component of membrane (GO:0016021);; Molecular Function: ATPase activity (GO:0016887);;	K21396|3.9e-48|gsl:Gasu_36200|K21396 ATP-binding cassette, subfamily G (WHITE), eye pigment precursor transporter | (RefSeq) ABC transporter, ATP-binding protein	--	[Q]	Secondary metabolites biosynthesis, transport and catabolism	ABC-2 type transporter	ABC transporter G family member STR OS=Petunia hybrida OX=4102 GN=STR PE=2 SV=1	V	Defense mechanisms	hypothetical protein OsI_31299 [Oryza sativa Indica Group]
Oryza_sativa_newGene_5981	586	528	455	0	0	0	11.6413	10.5675	5.67753	0	0	0	1.18334e-61	-6.60075	down	--	--	--	--	--	--	--	--	--	--	--	hypothetical protein EE612_002826 [Oryza sativa]
BGIOSGA010195	0	0	0	286	198	259	0	0	0	46.4748	27.2556	40.478	3.09309e-48	6.05007	up	[O]	Posttranslational modification, protein turnover, chaperones	Molecular Function: threonine-type endopeptidase activity (GO:0004298);; Cellular Component: nucleus (GO:0005634);; Cellular Component: cytoplasm (GO:0005737);; Biological Process: ubiquitin-dependent protein catabolic process (GO:0006511);; Cellular Component: proteasome core complex, alpha-subunit complex (GO:0019773);;	K02729|2.2e-25|ats:109747979|K02729 20S proteasome subunit alpha 5 [EC:3.4.25.1] | (RefSeq) LOC109747979; proteasome subunit alpha type-5	Proteasome (ko03050)	[O]	Posttranslational modification, protein turnover, chaperones	Proteasome subunit A N-terminal signature	Proteasome subunit alpha type-5 OS=Oryza sativa subsp. japonica OX=39947 GN=PAE1 PE=2 SV=1	O	Posttranslational modification, protein turnover, chaperones	hypothetical protein OsI_12722 [Oryza sativa Indica Group]
BGIOSGA005158	2500	1942	1450	433	408	604	195.491	148.77	115.4	35.7174	28.524	48.0131	1.23075e-10	-1.65435	down	--	--	--	--	--	--	--	--	--	--	--	hypothetical protein OsI_05179 [Oryza sativa Indica Group]
BGIOSGA006780	2666	3457	4187	11260	629584	131143	56.6984	72.0411	90.6698	253.157	11974.4	2837.3	0.000447447	2.03781	up	--	--	Molecular Function: nutrient reservoir activity (GO:0045735);;	--	--	--	--	Cupin	Glutelin type-B 1 OS=Oryza sativa subsp. japonica OX=39947 GN=GluB1-A PE=2 SV=3	S	Function unknown	hypothetical protein OsI_06572 [Oryza sativa Indica Group]
BGIOSGA033646	0	0	0	48	52	62	0	0	0	0.79192	0.714981	0.974735	1.82145e-14	3.80701	up	--	--	--	--	--	--	--	--	--	--	--	hypothetical protein OsI_36810 [Oryza sativa Indica Group]
BGIOSGA016240	423	455	525	0	0	0	11.4914	12.0932	14.5281	0	0	0	2.80319e-58	-6.46325	down	--	--	--	--	--	--	--	Protein of unknown function (DUF1618)	--	S	Function unknown	hypothetical protein OsI_15608 [Oryza sativa Indica Group]
BGIOSGA017511	126	194	170	0	0	0	1.2643	1.91196	1.74512	0	0	0	6.59637e-28	-4.93842	down	--	--	Molecular Function: nucleic acid binding (GO:0003676);; Molecular Function: zinc ion binding (GO:0008270);;	K17086|3.0e-84|fve:101300290|K17086 transmembrane 9 superfamily member 2/4 | (RefSeq) uncharacterized LOC101300290	--	--	--	MULE transposase domain	--	S	Function unknown	hypothetical protein OsI_21092 [Oryza sativa Indica Group]
BGIOSGA020916	0	0	0	349	269	318	0	0	0	18.3626	11.9548	16.0777	7.07988e-57	6.40694	up	--	--	--	K16290|1.0e-15|tcc:18592094|K16290 xylem cysteine proteinase [EC:3.4.22.-] | (RefSeq) cysteine protease XCP2	--	[O]	Posttranslational modification, protein turnover, chaperones	Cathepsin propeptide inhibitor domain (I29)	Ananain OS=Ananas comosus OX=4615 GN=AN1 PE=1 SV=2	O	Posttranslational modification, protein turnover, chaperones	hypothetical protein OsI_23643 [Oryza sativa Indica Group]
BGIOSGA031143	164	116	159	520	416	422	1.66967	1.15456	1.64904	5.61382	3.79416	4.37664	3.57565e-15	1.79183	up	[HR]	Coenzyme transport and metabolism;; General function prediction only	--	K20291|3.0e-52|dosa:Os09t0532800-01|K20291 conserved oligomeric Golgi complex subunit 4 | (RefSeq) Os09g0532800; Similar to peptidase S8 and S53, subtilisin, kexin, sedolisin.	--	[R]	General function prediction only	PPR repeat	Pentatricopeptide repeat-containing protein At5g62370 OS=Arabidopsis thaliana OX=3702 GN=At5g62370 PE=2 SV=1	S	Function unknown	hypothetical protein OsI_32153 [Oryza sativa Indica Group]
BGIOSGA014062	425	696	894	1053	2952	1505	8.314	13.345	17.8188	21.7897	51.7083	29.9886	0.000561206	1.48088	up	[IQ]	Lipid transport and metabolism;; Secondary metabolites biosynthesis, transport and catabolism	Molecular Function: catalytic activity (GO:0003824);;	K22133|3.8e-285|dosa:Os04t0683700-01|K22133 oxalate---CoA ligase [EC:6.2.1.8] | (RefSeq) Os04g0683700; Similar to 4-coumarate-CoA ligase-like protein (Adenosine monophosphate binding protein 3 AMPBP3).	Glyoxylate and dicarboxylate metabolism (ko00630)	[I]	Lipid transport and metabolism	AMP-binding enzyme	Oxalate--CoA ligase OS=Arabidopsis thaliana OX=3702 GN=AAE3 PE=1 SV=1	IQ	Lipid transport and metabolism;; Secondary metabolites biosynthesis, transport and catabolism	oxalate--CoA ligase [Oryza sativa Japonica Group]
BGIOSGA007012	40	29	29	32	206	151	0.800526	0.567398	0.592617	0.675712	3.70096	3.07912	0.00562155	1.57514	up	[T]	Signal transduction mechanisms	Molecular Function: protein kinase activity (GO:0004672);; Molecular Function: ATP binding (GO:0005524);; Cellular Component: integral component of membrane (GO:0016021);;	K13430|2.6e-68|sbi:8056791|K13430 serine/threonine-protein kinase PBS1 [EC:2.7.11.1] | (RefSeq) serine/threonine-protein kinase PBS1	Plant-pathogen interaction (ko04626)	[T]	Signal transduction mechanisms	Protein kinase domain	Probable receptor-like protein kinase At1g80640 OS=Arabidopsis thaliana OX=3702 GN=At1g80640 PE=2 SV=1	T	Signal transduction mechanisms	hypothetical protein OsI_06115 [Oryza sativa Indica Group]
BGIOSGA029432	78	71	60	14	11	6	0.829498	0.743927	0.655762	0.148575	0.097324	0.060262	3.80813e-05	-1.93099	down	--	--	Biological Process: defense response (GO:0006952);; Molecular Function: ADP binding (GO:0043531);;	K13457|8.6e-126|sbi:8073755|K13457 disease resistance protein RPM1 | (RefSeq) disease resistance protein RPM1	Plant-pathogen interaction (ko04626)	[T]	Signal transduction mechanisms	NB-ARC domain	Disease resistance protein Pik-2 OS=Oryza sativa subsp. japonica OX=39947 GN=PIK-2 PE=3 SV=1	S	Function unknown	hypothetical protein OsI_32052 [Oryza sativa Indica Group]
BGIOSGA021171	2271	2906	2836	3770	8342	5456	154.937	194.273	197.026	271.862	508.935	378.673	0.000120576	1.29641	up	--	--	Molecular Function: ATP binding (GO:0005524);; Molecular Function: transferase activity (GO:0016740);;	K06689|8.3e-84|osa:4341133|K06689 ubiquitin-conjugating enzyme E2 D [EC:2.3.2.23] | (RefSeq) ubiquitin-conjugating enzyme E2-17 kDa	Ubiquitin mediated proteolysis (ko04120);; Protein processing in endoplasmic reticulum (ko04141)	[O]	Posttranslational modification, protein turnover, chaperones	Ubiquitin-conjugating enzyme	Ubiquitin-conjugating enzyme E2-17 kDa OS=Solanum lycopersicum OX=4081 PE=2 SV=1	O	Posttranslational modification, protein turnover, chaperones	ubiquitin-conjugating enzyme E2-17 kDa [Oryza sativa Japonica Group]
BGIOSGA014182	893	749	436	246	245	298	21.1606	17.3818	10.5114	6.14204	5.18807	7.17919	0.00170646	-1.03654	down	[E]	Amino acid transport and metabolism	Molecular Function: glutamate-ammonia ligase activity (GO:0004356);; Molecular Function: ATP binding (GO:0005524);; Cellular Component: mitochondrion (GO:0005739);; Biological Process: glutamine biosynthetic process (GO:0006542);; Cellular Component: chloroplast thylakoid membrane (GO:0009535);; Cellular Component: chloroplast stroma (GO:0009570);; Cellular Component: chloroplast envelope (GO:000…	K01915|6.0e-252|dosa:Os04t0659100-01|K01915 glutamine synthetase [EC:6.3.1.2] | (RefSeq) Os04g0659100, GS2, GLUTAMINE_SYNTHETASE_2; Glutamine synthetase shoot isozyme, chloroplast precursor (EC 6.3.1.2) (Glutamate--ammonia ligase) (Clone lambda-GS31).	Arginine biosynthesis (ko00220);; Alanine, aspartate and glutamate metabolism (ko00250);; Glyoxylate and dicarboxylate metabolism (ko00630);; Nitrogen metabolism (ko00910);; Biosynthesis of amino acids (ko01230)	[E]	Amino acid transport and metabolism	Glutamine synthetase, catalytic domain	Glutamine synthetase, chloroplastic OS=Oryza sativa subsp. japonica OX=39947 GN=GLN2 PE=1 SV=1	E	Amino acid transport and metabolism	glutamine synthetase, chloroplastic [Oryza sativa Japonica Group]
BGIOSGA011448	124	133	116	163	310	250	3.18171	3.35805	3.04354	4.4428	7.13262	6.54444	0.00335676	1.10932	up	--	--	--	--	--	--	--	Protein of unknown function (DUF740)	--	S	Function unknown	hypothetical protein EE612_015318, partial [Oryza sativa]
BGIOSGA000510	1161	685	721	109	162	105	84.8542	49.0294	53.6291	8.40925	10.553	7.76149	6.27882e-13	-2.24127	down	--	--	--	--	--	--	--	--	--	S	Function unknown	hypothetical protein OsI_04391 [Oryza sativa Indica Group]
BGIOSGA035332	18	27	20	36	1779	782	0.592929	0.909441	0.695301	1.29115	54.9854	27.4982	0.00969546	1.56353	up	--	--	Molecular Function: DNA binding (GO:0003677);; Cellular Component: nucleus (GO:0005634);; Biological Process: regulation of transcription, DNA-templated (GO:0006355);;	K00521|7.3e-15|cmos:111447866|K00521 ferric-chelate reductase [EC:1.16.1.7] | (RefSeq) ferric reduction oxidase 7, chloroplastic-like	--	--	--	No apical meristem (NAM) protein	NAC domain-containing protein 18 OS=Arabidopsis thaliana OX=3702 GN=NAC018 PE=2 SV=1	--	--	hypothetical protein OsI_36241 [Oryza sativa Indica Group]
BGIOSGA029903	14	18	20	67	50	54	1.61403	2.01167	2.32399	8.35546	5.19615	6.42223	0.00020554	1.6284	up	--	--	Cellular Component: integral component of membrane (GO:0016021);;	--	--	--	--	--	--	S	Function unknown	hypothetical protein OsI_31055 [Oryza sativa Indica Group]
BGIOSGA027133	54	46	69	5	3	15	2.2312	1.84091	2.86701	0.217301	0.101754	0.608726	0.00197898	-1.74144	down	--	--	Cellular Component: ribosome (GO:0005840);;	--	--	--	--	No apical meristem-associated C-terminal domain	--	--	--	TPA_exp: unknown [Oryza sativa (japonica cultivar-group)] [Oryza sativa Japonica Group]
BGIOSGA028133	29	43	30	293	129	153	1.22572	1.78778	1.30863	13.3222	4.96505	6.69664	3.60123e-10	2.33758	up	--	--	--	--	--	[R]	General function prediction only	--	Putative F-box/LRR-repeat protein 23 OS=Arabidopsis thaliana OX=3702 GN=FBL23 PE=4 SV=1	S	Function unknown	hypothetical protein OsI_28124 [Oryza sativa Indica Group]
BGIOSGA002519	491	470	449	136	191	198	15.4047	14.4342	14.3307	4.48537	5.35088	6.31286	7.28793e-05	-1.07991	down	--	--	--	--	--	[T]	Signal transduction mechanisms	Wall-associated receptor kinase galacturonan-binding	LEAF RUST 10 DISEASE-RESISTANCE LOCUS RECEPTOR-LIKE PROTEIN KINASE-like 2.8 OS=Arabidopsis thaliana OX=3702 GN=LRK10L-2.8 PE=2 SV=2	--	--	hypothetical protein OsI_00129 [Oryza sativa Indica Group]
BGIOSGA030524	156	161	96	0	0	0	1.52944	1.54872	0.959771	0	0	0	2.10957e-23	-4.62521	down	--	--	Molecular Function: ADP binding (GO:0043531);;	K15078|8.4e-50|vvi:100255136|K15078 structure-specific endonuclease subunit SLX1 [EC:3.6.1.-] | (RefSeq) putative disease resistance protein RGA1	--	[T]	Signal transduction mechanisms	NB-ARC domain	Putative disease resistance protein RGA1 OS=Solanum bulbocastanum OX=147425 GN=RGA1 PE=2 SV=2	S	Function unknown	hypothetical protein OsI_30910 [Oryza sativa Indica Group]
BGIOSGA036734	95	72	83	0	0	0	11.5457	8.59785	10.2298	0	0	0	7.04548e-17	-4.03929	down	--	--	--	--	--	--	--	--	--	--	--	hypothetical protein OsI_37280 [Oryza sativa Indica Group]
BGIOSGA022961	223	148	225	105	40	60	5.7076	3.72043	5.87148	2.83105	0.914337	1.56485	0.00963265	-1.12123	down	[V]	Defense mechanisms	Molecular Function: antiporter activity (GO:0015297);; Cellular Component: integral component of membrane (GO:0016021);; Molecular Function: xenobiotic transporter activity (GO:0042910);;	K03327|5.3e-194|dosa:Os06t0494400-01|K03327 multidrug resistance protein, MATE family | (RefSeq) Os06g0494400; Multi antimicrobial extrusion protein MatE family protein.	--	[R]	General function prediction only	MatE	Protein DETOXIFICATION 16 OS=Arabidopsis thaliana OX=3702 GN=DTX16 PE=2 SV=1	V	Defense mechanisms	hypothetical protein OsI_23071 [Oryza sativa Indica Group]
Oryza_sativa_newGene_5990	0	0	3	174	81	158	0	0	0.032083	2.89971	1.11608	2.49107	9.75548e-24	4.5431	up	--	--	--	--	--	--	--	--	--	--	--	hypothetical protein LOC_Os11g22450 [Oryza sativa Japonica Group]
BGIOSGA035032	1449	1495	1553	0	0	0	13.1516	13.2896	14.3459	0	0	0	5.85048e-107	-8.02515	down	[T]	Signal transduction mechanisms	Biological Process: defense response (GO:0006952);; Molecular Function: ADP binding (GO:0043531);;	K13457|1.3e-112|ats:109760587|K13457 disease resistance protein RPM1 | (RefSeq) LOC109760587; putative disease resistance RPP13-like protein 3	Plant-pathogen interaction (ko04626)	[T]	Signal transduction mechanisms	NB-ARC domain	Disease resistance protein RGA5 OS=Oryza sativa subsp. japonica OX=39947 GN=RGA5 PE=1 SV=1	S	Function unknown	hypothetical protein OsI_35590 [Oryza sativa Indica Group]
Oryza_sativa_newGene_771	50	64	55	145	72	120	0.685679	0.855182	0.765813	2.093	0.877834	1.67117	0.00575326	1.09437	up	--	--	--	K17545|5.2e-119|zma:103634684|K17545 serine/threonine-protein kinase ULK4 [EC:2.7.11.1] | (RefSeq) uncharacterized protein LOC103634684	--	[R]	General function prediction only	gag-polypeptide of LTR copia-type	Retrovirus-related Pol polyprotein from transposon RE2 OS=Arabidopsis thaliana OX=3702 GN=RE2 PE=4 SV=1	L	Replication, recombination and repair	hypothetical protein OsI_02999 [Oryza sativa Indica Group]
Oryza_sativa_newGene_2159	90	112	69	33	27	31	1.65131	1.52919	0.967093	0.589744	0.416985	0.548616	0.00824924	-1.12982	down	--	--	Biological Process: telomere maintenance (GO:0000723);; Molecular Function: DNA helicase activity (GO:0003678);; Molecular Function: ATP binding (GO:0005524);; Biological Process: DNA repair (GO:0006281);; Biological Process: DNA recombination (GO:0006310);;	K07466|1.2e-25|osa:9272338|K07466 replication factor A1 | (RefSeq) replication protein A 70 kDa DNA-binding subunit	DNA replication (ko03030);; Nucleotide excision repair (ko03420);; Mismatch repair (ko03430);; Homologous recombination (ko03440)	--	--	--	--	--	--	OSJNBb0013O03.4 [Oryza sativa Japonica Group]
BGIOSGA028082	0	0	0	177	86	198	0	0	0	4.20587	1.71649	4.52073	1.84391e-28	5.04101	up	--	--	Biological Process: defense response (GO:0006952);; Molecular Function: ADP binding (GO:0043531);;	K13457|2.1e-85|sbi:8076342|K13457 disease resistance protein RPM1 | (RefSeq) putative disease resistance RPP13-like protein 3	Plant-pathogen interaction (ko04626)	[T]	Signal transduction mechanisms	NB-ARC domain	Disease resistance protein RGA5 OS=Oryza sativa subsp. japonica OX=39947 GN=RGA5 PE=1 SV=1	S	Function unknown	hypothetical protein OsI_28016 [Oryza sativa Indica Group]
BGIOSGA028149	0	0	0	85	47	46	0	0	0	2.1545	1.01408	1.12259	3.06215e-14	3.79248	up	--	--	--	--	--	--	--	--	--	S	Function unknown	hypothetical protein OsI_28156 [Oryza sativa Indica Group]
BGIOSGA014738	141	195	252	414	3833	1651	5.14968	6.97089	9.37544	15.9809	125.322	61.4035	0.0015661	1.88563	up	--	--	--	--	--	--	--	--	--	S	Function unknown	uncharacterized protein LOC4336372 [Oryza sativa Japonica Group]
BGIOSGA019764	395	375	276	109	148	82	4.70515	4.37331	3.34747	1.36243	1.56923	0.995239	0.000737423	-1.20432	down	--	--	Molecular Function: ADP binding (GO:0043531);;	K15078|1.0e-109|vvi:100255136|K15078 structure-specific endonuclease subunit SLX1 [EC:3.6.1.-] | (RefSeq) putative disease resistance protein RGA1	--	[T]	Signal transduction mechanisms	NB-ARC domain	Putative disease resistance protein RGA3 OS=Solanum bulbocastanum OX=147425 GN=RGA3 PE=2 SV=2	S	Function unknown	hypothetical protein OsI_19758 [Oryza sativa Indica Group]
BGIOSGA029493	161	182	222	349	10314	4911	1.69901	1.88719	2.39041	3.90505	97.878	53.0093	0.00365903	1.74869	up	--	--	--	--	--	--	--	--	--	S	Function unknown	hypothetical protein OsI_31927 [Oryza sativa Indica Group]
BGIOSGA013613	406	390	361	589	8126	2345	12.6864	11.934	11.4913	19.4705	227.303	74.6035	0.00853584	1.63256	up	--	--	Molecular Function: peroxidase activity (GO:0004601);; Cellular Component: extracellular region (GO:0005576);; Biological Process: response to oxidative stress (GO:0006979);; Molecular Function: heme binding (GO:0020037);; Biological Process: hydrogen peroxide catabolic process (GO:0042744);; Molecular Function: metal ion binding (GO:0046872);;	K00430|1.8e-179|dosa:Os03t0762400-01|K00430 peroxidase [EC:1.11.1.7] | (RefSeq) Os03g0762400; Similar to Peroxidase2 precursor (EC 1.11.1.7).	Phenylpropanoid biosynthesis (ko00940)	--	--	Peroxidase	Peroxidase 35 OS=Arabidopsis thaliana OX=3702 GN=PER35 PE=1 SV=1	G	Carbohydrate transport and metabolism	peroxidase 35 [Oryza sativa Japonica Group]
BGIOSGA007941	1852	2344	3073	11204	577413	215658	37.5647	46.6048	63.4885	240.326	10477.9	4451.6	0.00540469	1.65397	up	--	--	Molecular Function: nutrient reservoir activity (GO:0045735);;	--	--	--	--	Cupin	Glutelin type-B 4 OS=Oryza sativa subsp. japonica OX=39947 GN=GLUB4 PE=1 SV=1	S	Function unknown	glutelin type-B 4 [Oryza sativa Japonica Group]
BGIOSGA010431	43	81	26	153	141	124	1.81384	3.31933	1.09221	6.78368	5.30204	5.30321	0.00146998	1.443	up	--	--	--	--	--	--	--	Plant transposase (Ptta/En/Spm family)	--	S	Function unknown	hypothetical protein OsI_12256 [Oryza sativa Indica Group]
BGIOSGA017630	18	15	35	37	504	142	0.407429	0.334586	0.801813	0.891718	10.4007	3.33721	0.00018901	2.11819	up	[T]	Signal transduction mechanisms	Molecular Function: protein kinase activity (GO:0004672);; Molecular Function: ATP binding (GO:0005524);;	K20716|3.5e-146|sita:101779583|K20716 mitogen-activated protein kinase kinase kinase 17/18 | (RefSeq) mitogen-activated protein kinase kinase kinase 17	MAPK signaling pathway - plant (ko04016)	[T]	Signal transduction mechanisms	Protein kinase domain	Mitogen-activated protein kinase kinase kinase 17 OS=Arabidopsis thaliana OX=3702 GN=MAPKKK17 PE=1 SV=1	T	Signal transduction mechanisms	hypothetical protein OsI_20854 [Oryza sativa Indica Group]
BGIOSGA025665	383	516	603	74	201	187	16.4274	21.6829	26.3041	3.31219	7.70116	8.13163	0.00715575	-1.19293	down	[O]	Posttranslational modification, protein turnover, chaperones	Biological Process: response to acid chemical (GO:0001101);; Molecular Function: molecular_function (GO:0003674);; Molecular Function: catalytic activity (GO:0003824);; Molecular Function: glutathione transferase activity (GO:0004364);; Molecular Function: binding (GO:0005488);; Molecular Function: protein binding (GO:0005515);; Cellular Component: cellular_component (GO:0005575);; Cellular Compo…	K00799|1.4e-122|dosa:Os07t0468100-01|K00799 glutathione S-transferase [EC:2.5.1.18] | (RefSeq) Os07g0468100, TAU_GLUTATHIONE_S-TRANSFERASE_46, GSTU46; Similar to Glutathione S-transferase GST 19 (EC 2.5.1.18).	Glutathione metabolism (ko00480)	[O]	Posttranslational modification, protein turnover, chaperones	Glutathione S-transferase, N-terminal domain	Probable glutathione S-transferase GSTU1 OS=Oryza sativa subsp. japonica OX=39947 GN=GSTU1 PE=1 SV=1	O	Posttranslational modification, protein turnover, chaperones	hypothetical protein OsI_25933 [Oryza sativa Indica Group]
Oryza_sativa_newGene_52	119	71	107	25	23	26	2.77694	1.64265	2.54148	0.614771	0.556043	0.613166	0.000418392	-1.47777	down	--	--	Molecular Function: ADP binding (GO:0043531);;	--	--	--	--	--	--	--	--	--
BGIOSGA002385	3045	3444	3610	763	596	824	562.708	623.783	679.315	148.975	98.5059	154.9	2.9359e-36	-1.90681	down	--	--	Molecular Function: metal ion binding (GO:0046872);;	--	--	--	--	Metallothionein	Metallothionein-like protein 2A OS=Oryza sativa subsp. japonica OX=39947 GN=MT2A PE=2 SV=1	S	Function unknown	hypothetical protein OsI_00418 [Oryza sativa Indica Group]
Oryza_sativa_newGene_5440	911	907	534	2711	3196	2643	36.2377	33.3547	21.2959	17.8532	20.0418	17.578	5.12039e-16	2.00865	up	--	--	--	--	--	--	--	--	--	--	--	hypothetical protein EE612_058696 [Oryza sativa]
BGIOSGA036880	41	28	26	54	164	175	3.38438	2.25148	2.16573	4.75586	12.2082	14.808	0.000321573	1.78045	up	--	--	Biological Process: lipid transport (GO:0006869);; Molecular Function: lipid binding (GO:0008289);;	--	--	--	--	Protease inhibitor/seed storage/LTP family	Non-specific lipid-transfer protein 3 OS=Oryza sativa subsp. indica OX=39946 GN=LTP110-A PE=2 SV=1	U	Intracellular trafficking, secretion, and vesicular transport	non-specific lipid-transfer protein 3 [Oryza sativa Japonica Group]
BGIOSGA036748	4371	4231	4043	1823	1429	1920	54.051	51.2665	50.905	23.8238	15.797	24.1473	3.44149e-14	-1.01468	down	--	--	Molecular Function: nucleic acid binding (GO:0003676);; Molecular Function: RNA-DNA hybrid ribonuclease activity (GO:0004523);;	--	--	--	--	Reverse transcriptase-like	--	--	--	hypothetical protein OsI_37253 [Oryza sativa Indica Group]
Oryza_sativa_newGene_1686	0	0	0	89	59	73	0	0	0	4.49852	2.48699	3.56515	2.69425e-19	4.28197	up	--	--	Molecular Function: DNA binding (GO:0003677);; Cellular Component: nucleus (GO:0005634);;	K00924|7.5e-07|ath:AT3G55450|K00924 kinase [EC:2.7.1.-] | (RefSeq) PBL1; PBS1-like 1	--	[T]	Signal transduction mechanisms	--	Probable serine/threonine-protein kinase PIX7 OS=Arabidopsis thaliana OX=3702 GN=PIX7 PE=1 SV=1	K	Transcription	Os01g0380700 [Oryza sativa Japonica Group]
BGIOSGA009251	65	84	146	91	773	424	0.804038	1.01378	1.84152	1.18997	8.58116	5.35396	0.00235662	1.68996	up	--	--	Molecular Function: inositol hexakisphosphate binding (GO:0000822);; Cellular Component: trans-Golgi network (GO:0005802);; Cellular Component: plasma membrane (GO:0005886);; Biological Process: polyphosphate biosynthetic process (GO:0006799);; Molecular Function: phosphate ion transmembrane transporter activity (GO:0015114);; Cellular Component: integral component of membrane (GO:0016021);; Biol…	K24195|0.0e+00|dosa:Os02t0809800-01|K24195 xenotropic and polytropic retrovirus receptor 1 | (RefSeq) Os02g0809800; Phosphate (Pi) transporter, Root-to-shoot Pi transfer	--	[U]	Intracellular trafficking, secretion, and vesicular transport	EXS family	Phosphate transporter PHO1-2 OS=Oryza sativa subsp. japonica OX=39947 GN=PHO1-2 PE=2 SV=1	T	Signal transduction mechanisms	hypothetical protein OsI_09380 [Oryza sativa Indica Group]
BGIOSGA015129	325	651	1119	2137	1190	1252	10.8921	21.38	38.2129	75.7971	35.6949	42.7301	0.00699442	1.17395	up	--	--	Cellular Component: integral component of membrane (GO:0016021);;	--	--	--	--	--	Probable F-box protein At2g36090 OS=Arabidopsis thaliana OX=3702 GN=At2g36090 PE=2 SV=1	S	Function unknown	probable F-box protein At2g36090 [Oryza sativa Japonica Group]
BGIOSGA008296	29	30	29	5	2	0	3.91089	4.0358	4.01305	0.725148	0.152341	0	0.00488755	-1.71697	down	--	--	Cellular Component: integral component of membrane (GO:0016021);;	K22418|7.3e-25|dosa:Os02t0511400-01|K22418 11beta/17beta-hydroxysteroid dehydrogenase [EC:1.1.1.146 1.1.1.-] | (RefSeq) Os02g0511400; Glucose/ribitol dehydrogenase family protein.	--	--	--	--	--	--	--	hypothetical protein OsI_07376 [Oryza sativa Indica Group]
BGIOSGA022447	0	0	0	76	37	62	0	0	0	1.80289	0.726635	1.40239	3.33215e-14	3.78626	up	--	--	--	--	--	--	--	Protein of unknown function (DUF1668)	--	S	Function unknown	hypothetical protein OsI_21969 [Oryza sativa Indica Group]
BGIOSGA038564	94	73	59	0	0	1	6.41661	4.87702	4.11928	0	0	0.002515	6.0077e-14	-3.69363	down	--	--	Molecular Function: nucleic acid binding (GO:0003676);; Molecular Function: RNA-DNA hybrid ribonuclease activity (GO:0004523);; Biological Process: DNA integration (GO:0015074);;	--	--	[R]	General function prediction only	--	--	L	Replication, recombination and repair	retrotransposon protein, putative, unclassified [Oryza sativa Japonica Group]
BGIOSGA033230	24	28	38	83	82	59	0.839002	0.964958	1.35225	3.09273	2.60405	2.12953	0.00236595	1.33422	up	--	--	--	--	--	--	--	--	--	S	Function unknown	hypothetical protein OsI_34215 [Oryza sativa Indica Group]
BGIOSGA017951	10	25	13	28	469	223	0.161458	0.396942	0.213836	0.479943	7.01101	3.78279	1.4399e-05	2.39592	up	--	--	Cellular Component: integral component of membrane (GO:0016021);;	K13946|1.9e-267|osa:4338948|K13946 auxin influx carrier (AUX1 LAX family) | (RefSeq) auxin transporter-like protein 2 isoform X2	Plant hormone signal transduction (ko04075)	[E]	Amino acid transport and metabolism	Transmembrane amino acid transporter protein	Auxin transporter-like protein 2 OS=Oryza sativa subsp. japonica OX=39947 GN=Os05g0447200 PE=2 SV=1	E	Amino acid transport and metabolism	hypothetical protein OsI_20150 [Oryza sativa Indica Group]
BGIOSGA005700	115	77	88	56	467	476	6.22022	4.05221	4.84719	3.20812	22.6593	26.3151	0.00982787	1.48094	up	--	--	Cellular Component: nucleus (GO:0005634);; Molecular Function: protein heterodimerization activity (GO:0046982);;	K08065|3.2e-93|dosa:Os02t0725900-01|K08065 nuclear transcription Y subunit beta | (RefSeq) Os02g0725900, HAP3K_SUBUNIT_OF_CCAAT-BOX_BINDING_COMPLEX, HAP3K/NK-YB1; Histone-fold domain containing protein.	--	[K]	Transcription	Histone-like transcription factor (CBF/NF-Y) and archaeal histone	Nuclear transcription factor Y subunit B-1 OS=Oryza sativa subsp. japonica OX=39947 GN=NFYB1 PE=1 SV=2	B	Chromatin structure and dynamics	hypothetical protein OsI_08769 [Oryza sativa Indica Group]
BGIOSGA030517	1567	1085	1020	270	472	175	44.7483	30.3606	29.641	8.14527	12.0469	5.06798	0.000214762	-1.47055	down	[T]	Signal transduction mechanisms	Molecular Function: protein serine/threonine phosphatase activity (GO:0004722);; Molecular Function: metal ion binding (GO:0046872);;	K14497|3.5e-181|dosa:Os09t0325700-01|K14497 protein phosphatase 2C [EC:3.1.3.16] | (RefSeq) Os09g0325700; Similar to Protein phpsphatase 2C (PP2C) (EC 3.1.3.16).	MAPK signaling pathway - plant (ko04016);; Plant hormone signal transduction (ko04075)	[T]	Signal transduction mechanisms	Protein phosphatase 2C	Probable protein phosphatase 2C 68 OS=Oryza sativa subsp. japonica OX=39947 GN=Os09g0325700 PE=2 SV=2	T	Signal transduction mechanisms	hypothetical protein OsI_30895 [Oryza sativa Indica Group]
BGIOSGA036753	144	116	106	32	32	53	3.55021	2.79882	2.64756	0.808836	0.689352	1.32015	0.00315683	-1.20321	down	[G]	Carbohydrate transport and metabolism	Molecular Function: hydrolase activity, hydrolyzing O-glycosyl compounds (GO:0004553);; Biological Process: carbohydrate metabolic process (GO:0005975);;	K19355|3.0e-232|dosa:Os12t0117300-00|K19355 mannan endo-1,4-beta-mannosidase [EC:3.2.1.78] | (RefSeq) Os12g0117300; Similar to Mannan endo-1,4-beta-mannosidase 8.	Fructose and mannose metabolism (ko00051)	--	--	Cellulase (glycosyl hydrolase family 5)	Mannan endo-1,4-beta-mannosidase 8 OS=Oryza sativa subsp. japonica OX=39947 GN=MAN8 PE=2 SV=2	G	Carbohydrate transport and metabolism	hypothetical protein OsI_37245 [Oryza sativa Indica Group]
BGIOSGA033665	835	804	628	310	269	294	21.7648	20.5166	16.6469	8.52166	6.2595	7.78759	5.32117e-08	-1.07515	down	--	--	Biological Process: transposition (GO:0032196);;	--	--	--	--	--	--	S	Function unknown	hypothetical protein OsI_36779 [Oryza sativa Indica Group]
BGIOSGA020770	436	469	598	1223	837	898	13.0197	13.715	18.2054	38.64	22.3731	27.2953	7.38829e-08	1.17844	up	[M]	Cell wall/membrane/envelope biogenesis	Molecular Function: catalytic activity (GO:0003824);;	K13265|3.4e-40|gmx:547660|K13265 vestitone reductase [EC:1.1.1.348] | (RefSeq) 2'-hydroxydihydrodaidzein reductase	Isoflavonoid biosynthesis (ko00943)	[V]	Defense mechanisms	NAD dependent epimerase/dehydratase family	Putative anthocyanidin reductase OS=Ginkgo biloba OX=3311 PE=2 SV=1	M	Cell wall/membrane/envelope biogenesis	hypothetical protein OsI_23928 [Oryza sativa Indica Group]
BGIOSGA011326	3243	4998	6582	11767	6955	9197	98.711	149.048	203.986	378.626	189.286	284.753	0.000295245	1.07915	up	--	--	Molecular Function: DNA binding (GO:0003677);; Molecular Function: transcription factor activity, sequence-specific DNA binding (GO:0003700);; Cellular Component: nucleus (GO:0005634);;	K09286|4.0e-126|dosa:Os03t0183300-01|K09286 EREBP-like factor | (RefSeq) Os03g0183300, ERF64, ETHYLENE_RESPONSE_FACTOR_64; Pathogenesis-related transcriptional factor and ERF domain containing protein.	--	--	--	AP2 domain	Ethylene-responsive transcription factor 1 OS=Oryza sativa subsp. japonica OX=39947 GN=EREBP1 PE=1 SV=1	K	Transcription	hypothetical protein OsI_10277 [Oryza sativa Indica Group]
BGIOSGA013181	19	29	36	877	721	743	0.552279	0.831325	1.07215	27.7066	19.2617	22.5948	1.53786e-86	4.73251	up	[L]	Replication, recombination and repair	Molecular Function: recombinase activity (GO:0000150);; Biological Process: DNA recombinase assembly (GO:0000730);; Cellular Component: condensed nuclear chromosome (GO:0000794);; Molecular Function: double-stranded DNA binding (GO:0003690);; Molecular Function: single-stranded DNA binding (GO:0003697);; Molecular Function: ATP binding (GO:0005524);; Biological Process: mitotic recombination (GO:…	K04482|6.4e-180|dosa:Os11t0615800-00|K04482 DNA repair protein RAD51 | (RefSeq) Os11g0615800, RAD51A1, DNA_REPAIR_PROTEIN_RAD51A; DNA repair and recombination, RecA-like domain containing protein.	Homologous recombination (ko03440)	[L]	Replication, recombination and repair	Rad51	DNA repair protein RAD51 homolog A OS=Zea mays OX=4577 GN=RAD51A PE=2 SV=2	L	Replication, recombination and repair	hypothetical protein OsI_36814 [Oryza sativa Indica Group]
BGIOSGA007563	0	0	2	195	95	120	0	0	0.071359	14.3002	5.86758	8.47937	7.14064e-26	4.72425	up	--	--	Cellular Component: integral component of membrane (GO:0016021);;	K15281|4.5e-42|spen:107023588|K15281 solute carrier family 35 | (RefSeq) GDP-mannose transporter GONST3-like isoform X1	--	[GOU]	Carbohydrate transport and metabolism;; Posttranslational modification, protein turnover, chaperones;; Intracellular trafficking, secretion, and vesicular transport	--	GDP-mannose transporter GONST3 OS=Arabidopsis thaliana OX=3702 GN=GONST3 PE=2 SV=1	U	Intracellular trafficking, secretion, and vesicular transport	hypothetical protein OsI_05900 [Oryza sativa Indica Group]
Oryza_sativa_newGene_4163	97	90	106	315	271	243	1.03446	0.937174	1.14638	3.55082	2.58375	2.64141	3.62997e-12	1.66606	up	--	--	Molecular Function: transcription factor activity, sequence-specific DNA binding (GO:0003700);; Cellular Component: nucleus (GO:0005634);; Molecular Function: ADP binding (GO:0043531);; Molecular Function: sequence-specific DNA binding (GO:0043565);;	K15078|4.7e-61|tcc:18614561|K15078 structure-specific endonuclease subunit SLX1 [EC:3.6.1.-] | (RefSeq) putative disease resistance protein RGA3	--	--	--	WRKY DNA -binding domain	Disease resistance protein RRS1 OS=Arabidopsis thaliana OX=3702 GN=RRS1 PE=1 SV=1	K	Transcription	hypothetical protein DAI22_07g099400 [Oryza sativa Japonica Group]
Oryza_sativa_newGene_3012	674	541	383	50	58	49	11.2644	8.78092	6.40131	0.901748	0.84232	0.798007	2.34458e-22	-2.8019	down	--	--	Biological Process: regulation of cyclin-dependent protein serine/threonine kinase activity (GO:0000079);; Molecular Function: protein kinase binding (GO:0019901);;	--	--	--	--	Cyclin	Cyclin-P4-1 OS=Oryza sativa subsp. japonica OX=39947 GN=CYCP4-1 PE=2 SV=1	S	Function unknown	cyclin-P4-1-like isoform X1 [Oryza sativa Japonica Group]
BGIOSGA029006	28	34	42	23	355	159	0.720644	0.842358	1.09612	0.616512	8.2142	4.18101	0.00664726	1.63069	up	--	--	--	K22285|3.4e-225|osa:4346042|K22285 oxysterol-binding protein-related protein 8 | (RefSeq) oxysterol-binding protein-related protein 4B isoform X1	--	[T]	Signal transduction mechanisms	Oxysterol-binding protein	Oxysterol-binding protein-related protein 4B OS=Arabidopsis thaliana OX=3702 GN=ORP4B PE=2 SV=2	S	Function unknown	oxysterol-binding protein-related protein 4B isoform X1 [Oryza sativa Japonica Group]
BGIOSGA013058	103	125	82	39	33	35	8.10208	9.67622	6.61974	3.24037	2.33242	2.8238	0.00503699	-1.11761	down	--	--	--	--	--	--	--	--	--	--	--	hypothetical protein OsI_12460 [Oryza sativa Indica Group]
BGIOSGA008253	145	173	123	536	446	396	4.10057	4.81013	3.54129	16.0629	11.3037	11.439	3.46238e-15	1.80885	up	--	--	Cellular Component: early endosome (GO:0005769);; Cellular Component: plasma membrane (GO:0005886);; Molecular Function: magnesium ion transmembrane transporter activity (GO:0015095);; Cellular Component: integral component of membrane (GO:0016021);;	K22733|7.1e-190|dosa:Os02t0498300-01|K22733 magnesium transporter | (RefSeq) Os02g0498300; Similar to non-imprinted in Prader-Willi/Angelman syndrome region protein 1.	--	[S]	Function unknown	Magnesium transporter NIPA	Probable magnesium transporter NIPA2 OS=Arabidopsis thaliana OX=3702 GN=At4g13800 PE=2 SV=1	S	Function unknown	hypothetical protein OsI_07305 [Oryza sativa Indica Group]
BGIOSGA018406	229	111	101	6	6	24	24.1531	11.4533	10.8042	0.638273	0.561895	2.49363	4.35105e-06	-2.33045	down	--	--	Cellular Component: integral component of membrane (GO:0016021);;	--	--	--	--	--	--	--	--	hypothetical protein OsI_19234 [Oryza sativa Indica Group]
BGIOSGA024702	71	85	89	120	318	149	8.89295	10.3742	11.3191	15.9105	35.6896	18.9605	0.00715919	1.28306	up	--	--	--	--	--	--	--	--	--	S	Function unknown	hypothetical protein OsI_25168 [Oryza sativa Indica Group]
BGIOSGA037248	304	283	342	112	58	62	11.1773	10.1949	12.791	4.33935	1.89847	2.30732	2.12544e-07	-1.60097	down	--	--	Molecular Function: molecular_function (GO:0003674);; Molecular Function: catalytic activity (GO:0003824);; Biological Process: proteolysis (GO:0006508);; Biological Process: nitrogen compound metabolic process (GO:0006807);; Biological Process: biological_process (GO:0008150);; Biological Process: metabolic process (GO:0008152);; Molecular Function: peptidase activity (GO:0008233);; Molecular Fu…	K01376|4.9e-90|dosa:Os12t0285500-01|K01376 Ufm1-specific protease 2 [EC:3.4.22.-] | (RefSeq) Os12g0285500; Hypothetical conserved gene.	--	[S]	Function unknown	Peptidase family C78	Probable Ufm1-specific protease OS=Oryza sativa subsp. japonica OX=39947 GN=Os12g0285500 PE=2 SV=2	O	Posttranslational modification, protein turnover, chaperones	hypothetical protein OsI_38010 [Oryza sativa Indica Group]
BGIOSGA012200	263	298	427	898	17875	7434	7.85909	8.72343	12.9796	28.3597	477.952	226.116	0.00121057	1.91921	up	[T]	Signal transduction mechanisms	Molecular Function: acid phosphatase activity (GO:0003993);; Molecular Function: metal ion binding (GO:0046872);;	K14379|1.7e-196|dosa:Os03t0238600-01|K14379 tartrate-resistant acid phosphatase type 5 [EC:3.1.3.2] | (RefSeq) Os03g0238600; Similar to Purple acid phosphatase.	Riboflavin metabolism (ko00740)	[O]	Posttranslational modification, protein turnover, chaperones	Calcineurin-like phosphoesterase	Purple acid phosphatase 3 OS=Arabidopsis thaliana OX=3702 GN=PAP3 PE=2 SV=1	S	Function unknown	purple acid phosphatase 3 [Oryza sativa Japonica Group]
BGIOSGA023489	155	279	272	469	619	418	2.89573	5.12398	5.19831	9.3074	10.3928	7.98344	0.000268156	1.2447	up	--	--	Biological Process: lipid transport (GO:0006869);; Molecular Function: lipid binding (GO:0008289);; Cellular Component: integral component of membrane (GO:0016021);;	K03511|1.3e-20|apro:F751_1873|K03511 DNA polymerase kappa [EC:2.7.7.7] | (RefSeq) DNA polymerase kappa	--	[R]	General function prediction only	C2 domain	Synaptotagmin-3 OS=Arabidopsis thaliana OX=3702 GN=SYT3 PE=2 SV=1	S	Function unknown	hypothetical protein OsI_24227 [Oryza sativa Indica Group]
BGIOSGA002380	221	421	527	842	1077	786	14.5803	27.2159	35.3717	58.7176	63.5554	52.7284	0.000188512	1.33206	up	--	--	Cellular Component: nucleosome (GO:0000786);; Molecular Function: DNA binding (GO:0003677);; Cellular Component: nucleus (GO:0005634);; Molecular Function: protein heterodimerization activity (GO:0046982);;	K11252|3.9e-52|osa:4324498|K11252 histone H2B | (RefSeq) histone H2B.8	--	[B]	Chromatin structure and dynamics	Core histone H2A/H2B/H3/H4	Histone H2B.8 OS=Oryza sativa subsp. indica OX=39946 GN=H2B.8 PE=3 SV=1	B	Chromatin structure and dynamics	RecName: Full=Histone H2B.8 [Oryza sativa Indica Group]
Oryza_sativa_newGene_5397	4136	4571	4001	1442	1045	1046	45.5916	83.5167	44.8025	17.6015	10.4315	12.8197	2.99141e-23	-1.55044	down	--	--	--	--	--	--	--	--	--	--	--	Os12g0219700, partial [Oryza sativa Japonica Group]
BGIOSGA026193	8	17	6	30	59	68	0.334132	0.789821	0.281316	1.45776	2.49148	3.28161	0.000999761	1.79868	up	--	--	Molecular Function: calcium ion binding (GO:0005509);; Cellular Component: integral component of membrane (GO:0016021);;	K02183|6.7e-18|jcu:105644079|K02183 calmodulin | (RefSeq) probable calcium-binding protein CML45	MAPK signaling pathway - plant (ko04016);; Phosphatidylinositol signaling system (ko04070);; Plant-pathogen interaction (ko04626)	--	--	EF-hand domain	--	DTZ	Cell cycle control, cell division, chromosome partitioning;; Signal transduction mechanisms;; Cytoskeleton	probable calcium-binding protein CML45 [Oryza sativa Japonica Group]
BGIOSGA028168	0	0	0	56	114	60	0	0	0	0.670386	1.15714	0.689944	2.1565e-15	3.94171	up	[M]	Cell wall/membrane/envelope biogenesis	Molecular Function: protein kinase activity (GO:0004672);; Molecular Function: ATP binding (GO:0005524);;	K13418|8.6e-67|hbr:110650478|K13418 somatic embryogenesis receptor kinase 1 [EC:2.7.10.1 2.7.11.1] | (RefSeq) somatic embryogenesis receptor kinase 1	--	--	--	Malectin domain	Probable LRR receptor-like serine/threonine-protein kinase At1g56130 OS=Arabidopsis thaliana OX=3702 GN=At1g56130 PE=2 SV=2	--	--	hypothetical protein OsI_28196 [Oryza sativa Indica Group]
Oryza_sativa_newGene_773	0	0	0	194	191	165	0	0	0	7.28993	6.05305	5.96543	1.87113e-39	5.62704	up	--	--	--	--	--	--	--	--	--	--	--	hypothetical protein DAI22_02g258300 [Oryza sativa Japonica Group]
BGIOSGA021076	148	150	123	469	346	394	4.60442	4.58694	3.89768	15.4782	9.67075	12.5343	7.32466e-17	1.70649	up	--	--	Molecular Function: peroxidase activity (GO:0004601);; Cellular Component: extracellular region (GO:0005576);; Biological Process: response to oxidative stress (GO:0006979);; Molecular Function: heme binding (GO:0020037);; Biological Process: hydrogen peroxide catabolic process (GO:0042744);; Molecular Function: metal ion binding (GO:0046872);;	K00430|3.7e-177|dosa:Os06t0547400-01|K00430 peroxidase [EC:1.11.1.7] | (RefSeq) Os06g0547400; Similar to Peroxidase P7 (EC 1.11.1.7) (TP7).	Phenylpropanoid biosynthesis (ko00940)	--	--	Peroxidase	Peroxidase P7 OS=Brassica rapa subsp. rapa OX=51350 PE=1 SV=3	S	Function unknown	peroxidase [Oryza sativa Japonica Group]
Oryza_sativa_newGene_7487	155	230	213	83	26	25	3.03486	4.41855	4.26544	1.70849	0.440696	0.484255	0.0012182	-1.53921	down	--	--	--	--	--	--	--	--	--	--	--	hypothetical protein LOC_Os12g22870 [Oryza sativa Japonica Group]
BGIOSGA005742	12	42	40	65	187	83	0.21854	0.76989	0.754556	1.28093	3.14223	1.58927	0.00801567	1.50111	up	[I]	Lipid transport and metabolism	Molecular Function: hydroxymethylglutaryl-CoA reductase (NADPH) activity (GO:0004420);; Cellular Component: endoplasmic reticulum membrane (GO:0005789);; Biological Process: isoprenoid biosynthetic process (GO:0008299);; Biological Process: coenzyme A metabolic process (GO:0015936);;	K00021|1.1e-269|osa:9272427|K00021 hydroxymethylglutaryl-CoA reductase (NADPH) [EC:1.1.1.34] | (RefSeq) 3-hydroxy-3-methylglutaryl-coenzyme A reductase 1	Terpenoid backbone biosynthesis (ko00900)	[I]	Lipid transport and metabolism	Hydroxymethylglutaryl-coenzyme A reductase	3-hydroxy-3-methylglutaryl-coenzyme A reductase 1 OS=Oryza sativa subsp. indica OX=39946 GN=HMG1 PE=2 SV=2	I	Lipid transport and metabolism	RecName: Full=3-hydroxy-3-methylglutaryl-coenzyme A reductase 1; Short=HMG-CoA reductase 1 [Oryza sativa Indica Group]
BGIOSGA024170	7	10	12	62	36	68	0.1239	0.159739	0.207074	1.15205	0.561642	1.23202	9.22914e-06	2.09964	up	--	--	Molecular Function: hydrolase activity, hydrolyzing O-glycosyl compounds (GO:0004553);; Biological Process: carbohydrate metabolic process (GO:0005975);;	K19891|1.1e-83|smo:SELMODRAFT_87871|K19891 glucan endo-1,3-beta-glucosidase 1/2/3 [EC:3.2.1.39] | (RefSeq) hypothetical protein	Starch and sucrose metabolism (ko00500)	--	--	Glycosyl hydrolases family 17	Glucan endo-1,3-beta-glucosidase 13 OS=Arabidopsis thaliana OX=3702 GN=At5g56590 PE=2 SV=1	S	Function unknown	hypothetical protein OsI_26335 [Oryza sativa Indica Group]
BGIOSGA029341	322	437	363	793	696	793	8.63268	11.4762	9.89228	22.4771	16.6866	21.6353	7.94974e-12	1.24789	up	--	--	Cellular Component: protein phosphatase type 2A complex (GO:0000159);; Molecular Function: growth factor activity (GO:0008083);; Cellular Component: membrane (GO:0016020);; Molecular Function: protein phosphatase regulator activity (GO:0019888);;	K11584|1.4e-196|dosa:Os09t0542700-00|K11584 serine/threonine-protein phosphatase 2A regulatory subunit B' | (RefSeq) Os09g0542700; Protein phosphatase 2A, regulatory B subunit, B56 family protein.	mRNA surveillance pathway (ko03015)	[T]	Signal transduction mechanisms	Protein phosphatase 2A regulatory B subunit (B56 family)	Serine/threonine protein phosphatase 2A 57 kDa regulatory subunit B' alpha isoform OS=Arabidopsis thaliana OX=3702 GN=B'ALPHA PE=1 SV=1	T	Signal transduction mechanisms	hypothetical protein OsI_32235 [Oryza sativa Indica Group]
Oryza_sativa_newGene_6699	4653	4348	4018	2	0	0	46.1826	40.2636	38.7307	0.016053	0	0	3.5341e-167	-9.17982	down	--	--	Molecular Function: DNA binding (GO:0003677);; Molecular Function: transposase activity (GO:0004803);; Biological Process: transposition, DNA-mediated (GO:0006313);; Molecular Function: zinc ion binding (GO:0008270);;	K17604|5.4e-59|pop:18098457|K17604 zinc finger SWIM domain-containing protein 3 | (RefSeq) uncharacterized protein LOC18098457	--	--	--	MULE transposase domain	--	--	--	Putative Mutator protein [Oryza sativa Japonica Group]
BGIOSGA009140	163	245	197	292	666	469	4.4129	6.51009	5.42587	8.38028	16.1701	12.9426	0.000540069	1.34451	up	--	--	Molecular Function: intramolecular lyase activity (GO:0016872);;	--	--	--	--	Chalcone isomerase like	Fatty-acid-binding protein 2 OS=Arabidopsis thaliana OX=3702 GN=FAP2 PE=2 SV=2	S	Function unknown	hypothetical protein OsI_09158 [Oryza sativa Indica Group]
Oryza_sativa_newGene_171	0	0	0	1011	1073	946	0	0	0	31.6165	28.4056	28.4842	1.33025e-99	7.88827	up	--	--	--	--	--	--	--	--	--	--	--	hypothetical protein [Oryza sativa Japonica Group]
BGIOSGA025624	536	278	151	55	42	39	14.1091	7.15171	4.0381	1.52041	0.975944	1.02112	1.61824e-06	-2.07619	down	[S]	Function unknown	Biological Process: carbohydrate metabolic process (GO:0005975);; Molecular Function: raffinose alpha-galactosidase activity (GO:0052692);;	K07407|6.7e-194|dosa:Os07t0452100-00|K07407 alpha-galactosidase [EC:3.2.1.22] | (RefSeq) Os07g0452100; Similar to Alpha-galactosidase.	Galactose metabolism (ko00052);; Glycerolipid metabolism (ko00561);; Sphingolipid metabolism (ko00600);; Glycosphingolipid biosynthesis - globo and isoglobo series (ko00603)	[G]	Carbohydrate transport and metabolism	Alpha galactosidase A	Alpha-galactosidase 1 OS=Arabidopsis thaliana OX=3702 GN=AGAL1 PE=2 SV=1	G	Carbohydrate transport and metabolism	hypothetical protein OsI_25855 [Oryza sativa Indica Group]
BGIOSGA028653	277	239	298	697	568	410	7.57882	6.39831	8.31168	20.1693	13.9004	11.4175	6.30604e-06	1.22222	up	[G]	Carbohydrate transport and metabolism	Molecular Function: trehalose-phosphatase activity (GO:0004805);; Biological Process: trehalose biosynthetic process (GO:0005992);;	K01087|1.9e-209|dosa:Os08t0409100-01|K01087 trehalose 6-phosphate phosphatase [EC:3.1.3.12] | (RefSeq) Os08g0409100, TREHALOSE-6-PHOSPHATE_PHOSHPHATASE_6, TPP6; Trehalose-6-phosphate phosphatase.	Starch and sucrose metabolism (ko00500)	[G]	Carbohydrate transport and metabolism	Trehalose-phosphatase	Probable trehalose-phosphate phosphatase 6 OS=Oryza sativa subsp. japonica OX=39947 GN=TPP6 PE=2 SV=1	G	Carbohydrate transport and metabolism	hypothetical protein OsI_29208 [Oryza sativa Indica Group]
BGIOSGA007455	0	0	0	199	167	259	0	0	0	8.48627	6.02925	10.6436	3.901e-41	5.73357	up	--	--	--	--	--	--	--	Plant transposase (Ptta/En/Spm family)	--	--	--	hypothetical protein OsI_05704 [Oryza sativa Indica Group]
Oryza_sativa_newGene_3483	0	0	0	46	36	62	0	0	0	2.71057	1.78217	3.5127	2.61258e-12	3.55849	up	--	--	Molecular Function: aspartic-type endopeptidase activity (GO:0004190);; Cellular Component: integral component of membrane (GO:0016021);;	--	--	--	--	--	--	S	Function unknown	--
BGIOSGA019766	0	0	0	698	560	489	0	0	0	5.2238	3.54587	3.52391	3.51294e-75	7.13748	up	--	--	Molecular Function: nucleotide binding (GO:0000166);; Biological Process: defense response (GO:0006952);;	K13457|4.7e-83|ats:109763291|K13457 disease resistance protein RPM1 | (RefSeq) LOC109763291; disease resistance protein RPM1-like	Plant-pathogen interaction (ko04626)	--	--	Rx N-terminal domain	Disease resistance protein Pik-2 OS=Oryza sativa subsp. japonica OX=39947 GN=PIK-2 PE=3 SV=1	S	Function unknown	hypothetical protein OsI_19760 [Oryza sativa Indica Group]
Oryza_sativa_newGene_5216	349	825	954	2758	1743	2093	8.19209	17.7919	22.9057	64.693	36.8723	47.9178	9.04909e-07	1.67967	up	--	--	--	--	--	--	--	--	--	--	--	Os03g0561415, partial [Oryza sativa Japonica Group]
BGIOSGA033259	27	22	43	26	478	211	0.925666	0.741213	1.49547	0.946984	14.7218	7.38263	0.000934605	1.92081	up	[Z]	Cytoskeleton	Cellular Component: cellular_component (GO:0005575);; Cellular Component: intracellular (GO:0005622);; Cellular Component: cell (GO:0005623);; Cellular Component: cytoskeleton (GO:0005856);; Cellular Component: organelle (GO:0043226);; Cellular Component: non-membrane-bounded organelle (GO:0043228);; Cellular Component: intracellular organelle (GO:0043229);; Cellular Component: intracellular non-…	K10355|2.9e-165|dosa:Os10t0510000-01|K10355 actin, other eukaryote | (RefSeq) Os10g0510000; Similar to actin.	--	[Z]	Cytoskeleton	Actin	Actin-2 OS=Oryza sativa subsp. indica OX=39946 GN=ACT2 PE=3 SV=1	Z	Cytoskeleton	hypothetical protein OsI_34279 [Oryza sativa Indica Group]
BGIOSGA018080	123	65	73	216	322	242	4.57741	2.34592	2.74938	8.49807	10.7372	9.18253	9.5832e-06	1.63179	up	--	--	Molecular Function: DNA binding (GO:0003677);; Molecular Function: zinc ion binding (GO:0008270);; Cellular Component: host cell nucleus (GO:0042025);;	--	--	[KB]	Transcription;; Chromatin structure and dynamics	CW-type Zinc Finger	Methyl-CpG-binding domain-containing protein 4 OS=Arabidopsis thaliana OX=3702 GN=MBD4 PE=1 SV=1	S	Function unknown	hypothetical protein OsI_19918 [Oryza sativa Indica Group]
Oryza_sativa_newGene_4147	93	133	136	160	361	363	0.795729	1.03099	1.09356	1.88494	2.79482	3.16373	0.00120684	1.3511	up	--	--	--	--	--	--	--	--	--	--	--	uncharacterized protein LOC107281173 isoform X2 [Oryza sativa Japonica Group]
BGIOSGA029103	83	67	43	370	297	266	1.88653	1.4855	0.993483	8.96522	6.09189	6.19915	1.21563e-14	2.30314	up	--	--	Molecular Function: transferase activity, transferring acyl groups other than amino-acyl groups (GO:0016747);;	K13065|1.3e-249|dosa:Os08t0543400-01|K13065 shikimate O-hydroxycinnamoyltransferase [EC:2.3.1.133] | (RefSeq) Os08g0543400; Transferase family protein.	Phenylpropanoid biosynthesis (ko00940);; Flavonoid biosynthesis (ko00941);; Stilbenoid, diarylheptanoid and gingerol biosynthesis (ko00945)	--	--	Transferase family	Putrescine hydroxycinnamoyltransferase 1 OS=Oryza sativa subsp. japonica OX=39947 GN=PHT1 PE=2 SV=1	S	Function unknown	putrescine hydroxycinnamoyltransferase 1-like isoform X2 [Oryza sativa Japonica Group]
BGIOSGA023209	17	21	37	43	183	123	1.25404	1.55716	2.89178	3.4958	12.5765	9.63509	0.00101542	1.77351	up	--	--	Molecular Function: GTPase activity (GO:0003924);; Molecular Function: GTP binding (GO:0005525);; Cellular Component: nucleus (GO:0005634);; Biological Process: nucleocytoplasmic transport (GO:0006913);; Biological Process: protein transport (GO:0015031);;	K07936|1.5e-68|dosa:Os06t0600301-00|K07936 GTP-binding nuclear protein Ran | (RefSeq) Os06g0600301; Similar to GTP-binding nuclear protein Ran1B (Fragment).	Ribosome biogenesis in eukaryotes (ko03008);; RNA transport (ko03013)	[U]	Intracellular trafficking, secretion, and vesicular transport	Ras family	GTP-binding nuclear protein Ran-3 OS=Oryza sativa subsp. indica OX=39946 GN=RAN3 PE=2 SV=2	S	Function unknown	hypothetical protein OsI_23598 [Oryza sativa Indica Group]
BGIOSGA005657	145	189	286	433	355	402	3.02703	3.86533	6.09398	9.57322	6.63736	8.55121	0.00053827	1.10338	up	--	--	Cellular Component: integral component of membrane (GO:0016021);;	K02184|4.7e-67|ini:109182789|K02184 formin 2 | (RefSeq) formin-like protein 1	--	[TZ]	Signal transduction mechanisms;; Cytoskeleton	Formin Homology 2 Domain	Formin-like protein 16 OS=Oryza sativa subsp. japonica OX=39947 GN=FH16 PE=2 SV=1	S	Function unknown	formin-like protein 16 [Oryza sativa Japonica Group]
BGIOSGA024610	3099	3501	4727	13918	111587	43407	221.808	245.603	344.584	1053.33	7144.15	3161.21	2.51088e-05	2.3494	up	--	--	Molecular Function: serine-type endopeptidase inhibitor activity (GO:0004867);; Molecular Function: IgE binding (GO:0019863);;	--	--	--	--	Protease inhibitor/seed storage/LTP family	Seed allergenic protein RAG1 OS=Oryza sativa subsp. japonica OX=39947 GN=RAG1 PE=1 SV=2	S	Function unknown	seed allergenic protein RAG1 [Oryza sativa Japonica Group]
Oryza_sativa_newGene_6143	1127	1047	861	0	0	0	12.9654	11.3012	9.55806	0	0	0	2.51508e-85	-7.43945	down	--	--	--	--	--	--	--	--	--	--	--	uncharacterized protein LOC107280564 [Oryza sativa Japonica Group]
BGIOSGA010004	65	27	49	92	108	239	2.88556	1.13716	2.20692	4.32435	4.26895	10.8252	0.00279328	1.48595	up	--	--	Cellular Component: cell wall (GO:0005618);; Molecular Function: manganese ion binding (GO:0030145);; Molecular Function: nutrient reservoir activity (GO:0045735);; Cellular Component: apoplast (GO:0048046);;	--	--	--	--	Cupin	Germin-like protein 3-5 OS=Oryza sativa subsp. japonica OX=39947 GN=Os03g0693900 PE=2 SV=1	S	Function unknown	germin-like protein 3-5 [Oryza sativa Japonica Group]
BGIOSGA021724	9	2	11	62	376	142	0.3826	0.043173	0.458	2.88148	14.7949	6.32645	7.80549e-09	2.98709	up	--	--	--	--	--	--	--	--	--	S	Function unknown	hypothetical protein OsI_22032 [Oryza sativa Indica Group]
BGIOSGA033316	64	57	39	102	116	116	2.71646	2.38497	1.66215	4.58192	4.42215	5.03656	0.00180045	1.1834	up	[O]	Posttranslational modification, protein turnover, chaperones	Molecular Function: protein binding (GO:0005515);;	K00799|1.6e-121|dosa:Os10t0527800-01|K00799 glutathione S-transferase [EC:2.5.1.18] | (RefSeq) Os10g0527800, TAU_GLUTATHIONE_S-TRANSFERASE_12, GSTU12; Similar to Tau class GST protein 3.	Glutathione metabolism (ko00480)	[O]	Posttranslational modification, protein turnover, chaperones	Glutathione S-transferase, N-terminal domain	Probable glutathione S-transferase GSTU6 OS=Oryza sativa subsp. japonica OX=39947 GN=GSTU6 PE=2 SV=2	O	Posttranslational modification, protein turnover, chaperones	hypothetical protein OsI_34399 [Oryza sativa Indica Group]
Oryza_sativa_newGene_1109	218	340	369	670	1120	725	6.23845	7.71267	11.9518	19.0579	28.0155	18.907	2.23767e-06	1.56077	up	--	--	--	--	--	--	--	--	--	--	--	hypothetical protein [Oryza sativa Japonica Group]
Oryza_sativa_newGene_425	2027	1499	972	12	5	10	14.4598	10.4776	7.05997	0.087387	0.025605	0.065472	3.81774e-75	-6.08848	down	--	--	--	--	--	--	--	--	--	--	--	Hypothetical protein [Oryza sativa Japonica Group]
BGIOSGA007892	2239	2760	3382	8214	362486	79697	58.8008	71.0211	90.4466	228.084	8515.43	2129.69	0.000424984	2.04958	up	--	--	Molecular Function: nutrient reservoir activity (GO:0045735);;	--	--	--	--	Cupin	Glutelin type-B 1 OS=Oryza sativa subsp. japonica OX=39947 GN=GluB1-A PE=2 SV=3	S	Function unknown	hypothetical protein OsI_06572 [Oryza sativa Indica Group]
BGIOSGA001275	0	0	0	76	36	48	0	0	0	0.832959	0.331728	0.503179	7.94365e-13	3.62666	up	--	--	Cellular Component: integral component of membrane (GO:0016021);;	K13466|2.9e-76|fve:101315391|K13466 EIX receptor 1/2 | (RefSeq) probable LRR receptor-like serine/threonine-protein kinase At1g34110	Plant-pathogen interaction (ko04626)	[R]	General function prediction only	Leucine rich repeat	Receptor-like protein 18 OS=Arabidopsis thaliana OX=3702 GN=RLP18 PE=2 SV=3	S	Function unknown	hypothetical protein OsI_02728 [Oryza sativa Indica Group]
BGIOSGA028242	9	0	0	57	97	107	0.144092	0	0	0.952901	1.38309	1.72697	2.43124e-05	2.38267	up	--		Molecular Function: protein kinase activity (GO:0004672);; Molecular Function: ATP binding (GO:0005524);; Biological Process: recognition of pollen (GO:0048544);;	K13418|2.9e-45|cic:CICLE_v10027231mg|K13418 somatic embryogenesis receptor kinase 1 [EC:2.7.10.1 2.7.11.1] | (RefSeq) hypothetical protein	--	--	--	Protein kinase domain	G-type lectin S-receptor-like serine/threonine-protein kinase LECRK2 OS=Oryza sativa subsp. indica OX=39946 GN=LECRK2 PE=2 SV=1	T	Signal transduction mechanisms	hypothetical protein OsI_28341 [Oryza sativa Indica Group]
Oryza_sativa_newGene_2691	298	261	262	292	1719	865	14.3282	11.8429	12.3249	14.0021	72.0257	40.638	0.000818882	1.65152	up	--	--	--	--	--	--	--	--	--	--	--	uncharacterized protein LOC4337532 isoform X1 [Oryza sativa Japonica Group]
BGIOSGA026212	34	54	102	145	164	312	0.660101	1.03618	2.02964	3.00235	2.86722	6.21722	0.000920518	1.57179	up	[QV]	Secondary metabolites biosynthesis, transport and catabolism;; Defense mechanisms	Molecular Function: monooxygenase activity (GO:0004497);; Molecular Function: iron ion binding (GO:0005506);; Cellular Component: integral component of membrane (GO:0016021);; Molecular Function: oxidoreductase activity, acting on paired donors, with incorporation or reduction of molecular oxygen (GO:0016705);; Molecular Function: heme binding (GO:0020037);;	K20660|3.2e-300|dosa:Os07t0635500-01|K20660 cytochrome P450 family 709 | (RefSeq) Os07g0635500; Similar to Cytochrome P450.	--	[QI]	Secondary metabolites biosynthesis, transport and catabolism;; Lipid transport and metabolism	Cytochrome P450	Cytochrome P450 709B2 OS=Arabidopsis thaliana OX=3702 GN=CYP709B2 PE=2 SV=1	Q	Secondary metabolites biosynthesis, transport and catabolism	hypothetical protein OsI_27008 [Oryza sativa Indica Group]
Oryza_sativa_newGene_4935	157	150	160	77	39	36	3.24336	3.00937	3.65852	1.66755	0.672022	0.783775	0.00251832	-1.20178	down	--	--	--	--	--	--	--	--	--	S	Function unknown	uncharacterized protein LOC4345922 isoform X2 [Oryza sativa Japonica Group]
BGIOSGA016043	517	403	296	104	144	117	72.9864	55.7374	42.4712	15.3867	18.0875	16.7017	6.52839e-05	-1.32156	down	--	--	Molecular Function: RNA binding (GO:0003723);;	--	--	--	--	Pumilio-family RNA binding repeat	--	--	--	hypothetical protein OsI_15172 [Oryza sativa Indica Group]
BGIOSGA030959	159	155	141	257	381	222	6.92723	6.6418	6.28381	11.8783	14.9059	9.86704	0.00187208	1.0921	up	--	--	Molecular Function: DNA binding (GO:0003677);; Cellular Component: nucleus (GO:0005634);; Biological Process: regulation of transcription, DNA-templated (GO:0006355);;	K16222|1.7e-19|dct:110107877|K16222 Dof zinc finger protein DOF5.5 | (RefSeq) cyclic dof factor 1 isoform X1	Circadian rhythm - plant (ko04712)	--	--	Dof domain, zinc finger	Dof zinc finger protein MNB1A OS=Zea mays OX=4577 GN=MNB1A PE=1 SV=2	S	Function unknown	hypothetical protein OsI_31752 [Oryza sativa Indica Group]
BGIOSGA034632	307	498	177	4	17	61	28.8518	45.8884	16.9211	0.34929	1.41533	5.76258	0.000191715	-2.07205	down	--	--	Cellular Component: integral component of membrane (GO:0016021);;	--	--	--	--	Hypoxia induced protein conserved region	--	S	Function unknown	hypothetical protein OsI_34836 [Oryza sativa Indica Group]
BGIOSGA032148	144	160	108	43	23	35	2.00703	2.19638	1.53668	0.62776	0.284672	0.486888	3.08225e-05	-1.55609	down	--	--	Molecular Function: ADP binding (GO:0043531);;	K13457|8.7e-110|ats:109760587|K13457 disease resistance protein RPM1 | (RefSeq) LOC109760587; putative disease resistance RPP13-like protein 3	Plant-pathogen interaction (ko04626)	[T]	Signal transduction mechanisms	NB-ARC domain	Disease resistance protein RGA5 OS=Oryza sativa subsp. japonica OX=39947 GN=RGA5 PE=1 SV=1	S	Function unknown	hypothetical protein OsI_33065 [Oryza sativa Indica Group]
BGIOSGA028098	15	25	34	82	94	102	0.707082	1.11223	1.61524	4.08667	3.96861	4.87288	1.71278e-05	1.81002	up	--	--	--	--	--	--	--	--	--	S	Function unknown	hypothetical protein OsI_28048 [Oryza sativa Indica Group]
BGIOSGA009044	163	148	102	61	38	43	4.31051	3.82095	2.74725	1.68394	0.895243	1.14835	0.00383393	-1.13447	down	--	--	Molecular Function: DNA binding (GO:0003677);; Cellular Component: nucleus (GO:0005634);; Biological Process: regulation of transcription, DNA-templated (GO:0006355);;	K00521|3.5e-49|cmos:111447866|K00521 ferric-chelate reductase [EC:1.16.1.7] | (RefSeq) ferric reduction oxidase 7, chloroplastic-like	--	--	--	No apical meristem (NAM) protein	Protein FEZ OS=Arabidopsis thaliana OX=3702 GN=FEZ PE=2 SV=1	S	Function unknown	hypothetical protein OsI_08921 [Oryza sativa Indica Group]
BGIOSGA033761	2	1	1	62	62	120	0.022053	0.014191	0.014671	1.44386	1.20955	2.68598	1.37371e-15	3.78829	up	--	--	Molecular Function: protein binding (GO:0005515);;	--	--	--	--	Protein of unknown function (DUF295)	F-box protein SKIP23 OS=Arabidopsis thaliana OX=3702 GN=SKIP23 PE=1 SV=1	S	Function unknown	hypothetical protein OsI_36572 [Oryza sativa Indica Group]
Oryza_sativa_newGene_2453	1798	1999	1086	5	9	4	17.8897	19.5001	12.6838	0.045222	0.067581	0.034885	2.55837e-87	-6.59252	down	--	--	--	--	--	--	--	--	--	--	--	Os04g0508950 [Oryza sativa Japonica Group]
BGIOSGA021518	81	103	140	111	549	376	3.80443	4.72003	6.67483	5.51168	23.0799	17.9823	0.00342707	1.51364	up	[T]	Signal transduction mechanisms	Biological Process: response to acid chemical (GO:0001101);; Molecular Function: molecular_function (GO:0003674);; Molecular Function: catalytic activity (GO:0003824);; Biological Process: response to stress (GO:0006950);; Biological Process: biological_process (GO:0008150);; Biological Process: response to water deprivation (GO:0009414);; Biological Process: response to water (GO:0009415);; Biol…	K17991|6.8e-111|dosa:Os06t0254700-01|K17991 peroxygenase [EC:1.11.2.3] | (RefSeq) Os06g0254700; Caleosin related family protein.	Cutin, suberine and wax biosynthesis (ko00073)	--	--	Caleosin related protein	Probable peroxygenase 4 OS=Arabidopsis thaliana OX=3702 GN=PXG4 PE=1 SV=1	S	Function unknown	probable peroxygenase 4 [Oryza sativa Japonica Group]
Oryza_sativa_newGene_3005	152	62	76	289	188	204	4.11561	1.63892	2.07741	8.27338	4.58053	5.74589	0.00232622	1.27436	up	--	--	Biological Process: regulation of cyclin-dependent protein serine/threonine kinase activity (GO:0000079);; Molecular Function: protein kinase binding (GO:0019901);;	--	--	[R]	General function prediction only	Cyclin	Cyclin-P4-1 OS=Oryza sativa subsp. japonica OX=39947 GN=CYCP4-1 PE=2 SV=1	S	Function unknown	hypothetical protein EE612_028672 [Oryza sativa]
BGIOSGA025570	894	851	654	158	208	224	15.6378	14.5775	11.652	2.92109	3.25301	3.97052	3.72396e-11	-1.6453	down	[G]	Carbohydrate transport and metabolism	Biological Process: carbohydrate metabolic process (GO:0005975);; Molecular Function: UDP-glycosyltransferase activity (GO:0008194);; Molecular Function: transferase activity, transferring hexosyl groups (GO:0016758);; Biological Process: lipid glycosylation (GO:0030259);;	K05841|0.0e+00|dosa:Os07t0419500-01|K05841 sterol 3beta-glucosyltransferase [EC:2.4.1.173] | (RefSeq) Os07g0419500; Similar to UDP-glucose:sterol glucosyltransferase.	--	[GC]	Carbohydrate transport and metabolism;; Energy production and conversion	Glycosyltransferase family 28 N-terminal domain	Sterol 3-beta-glucosyltransferase UGT80A2 OS=Arabidopsis thaliana OX=3702 GN=UGT80A2 PE=1 SV=1	S	Function unknown	sterol 3-beta-glucosyltransferase UGT80A2 isoform X1 [Oryza sativa Japonica Group]
Oryza_sativa_newGene_2888	1094	1025	995	2	0	3	7.81431	7.16946	7.23248	0.011631	0	0.019962	4.38894e-95	-7.10578	down	--	--	Molecular Function: nucleic acid binding (GO:0003676);; Molecular Function: aspartic-type endopeptidase activity (GO:0004190);; Biological Process: DNA integration (GO:0015074);;	K12349|3.7e-91|ccaj:109806181|K12349 neutral ceramidase [EC:3.5.1.23] | (RefSeq) neutral ceramidase-like	Sphingolipid metabolism (ko00600)	[R]	General function prediction only	RNase H-like domain found in reverse transcriptase	--	L	Replication, recombination and repair	putative polyprotein [Oryza sativa Japonica Group]
BGIOSGA024388	35	44	24	88	88	73	0.575157	0.701078	0.396687	1.54755	1.30205	1.22209	0.00173089	1.32071	up	--	--	Molecular Function: RNA binding (GO:0003723);;	K21444|4.1e-302|osa:4343089|K21444 poly(rC)-binding protein 3/4 | (RefSeq) uncharacterized protein LOC4343089	--	[AR]	RNA processing and modification;; General function prediction only	KH domain	KH domain-containing protein At4g18375 OS=Arabidopsis thaliana OX=3702 GN=At4g18375 PE=2 SV=1	S	Function unknown	hypothetical protein OsI_25823 [Oryza sativa Indica Group]
BGIOSGA034264	59	60	73	4	10	9	0.631807	0.632386	0.798196	0.039388	0.09652	0.091213	2.66541e-05	-2.05644	down	--	--	Molecular Function: ADP binding (GO:0043531);;	K13457|0.0e+00|obr:102719435|K13457 disease resistance protein RPM1 | (RefSeq) disease resistance protein RPM1-like	Plant-pathogen interaction (ko04626)	[T]	Signal transduction mechanisms	NB-ARC domain	Disease resistance protein RPM1 OS=Arabidopsis thaliana OX=3702 GN=RPM1 PE=1 SV=1	S	Function unknown	hypothetical protein OsI_35586 [Oryza sativa Indica Group]
BGIOSGA018017	36	38	22	11	326	286	0.506292	0.523054	0.30982	0.158687	4.13072	4.11143	0.00734252	1.64553	up	[E]	Amino acid transport and metabolism	Cellular Component: cytoplasm (GO:0005737);; Biological Process: L-phenylalanine catabolic process (GO:0006559);; Biological Process: cinnamic acid biosynthetic process (GO:0009800);; Molecular Function: phenylalanine ammonia-lyase activity (GO:0045548);;	K10775|0.0e+00|dosa:Os05t0427400-00|K10775 phenylalanine ammonia-lyase [EC:4.3.1.24] | (RefSeq) Os05g0427400; Similar to Phenylalanine ammonia-lyase.	Phenylalanine metabolism (ko00360);; Phenylpropanoid biosynthesis (ko00940)	[Q]	Secondary metabolites biosynthesis, transport and catabolism	Aromatic amino acid lyase	Phenylalanine ammonia-lyase OS=Oryza sativa subsp. indica OX=39946 GN=ZB8 PE=3 SV=1	E	Amino acid transport and metabolism	phenylalanine ammonia-lyase [Oryza sativa Japonica Group]
BGIOSGA018985	286	278	193	72	68	119	9.50182	9.05601	6.51817	2.50631	2.02573	4.00837	0.00140173	-1.1544	down	[QV]	Secondary metabolites biosynthesis, transport and catabolism;; Defense mechanisms	Molecular Function: monooxygenase activity (GO:0004497);; Molecular Function: iron ion binding (GO:0005506);; Molecular Function: oxidoreductase activity, acting on paired donors, with incorporation or reduction of molecular oxygen (GO:0016705);; Molecular Function: heme binding (GO:0020037);;	K07437|1.3e-59|qsu:112035144|K07437 cytochrome P450 family 26 subfamily A | (RefSeq) cytochrome P450 90A1-like	--	[QI]	Secondary metabolites biosynthesis, transport and catabolism;; Lipid transport and metabolism	Cytochrome P450	Abscisic acid 8'-hydroxylase 2 OS=Oryza sativa subsp. indica OX=39946 GN=CYP707A6 PE=2 SV=1	Q	Secondary metabolites biosynthesis, transport and catabolism	hypothetical protein OsI_18083 [Oryza sativa Indica Group]
BGIOSGA017796	334	377	547	1000	1282	680	14.2847	15.8182	23.8844	45.3176	49.1625	29.6634	4.37952e-05	1.3719	up	--	--	Molecular Function: DNA binding (GO:0003677);; Molecular Function: transcription factor activity, sequence-specific DNA binding (GO:0003700);; Cellular Component: nucleus (GO:0005634);;	K09286|6.7e-104|dosa:Os05t0497300-01|K09286 EREBP-like factor | (RefSeq) Os05g0497300, ERF74, ETHYLENE_RESPONSE_FACTOR_74; Similar to Ethylene response factor 2.	--	--	--	AP2 domain	Ethylene-responsive transcription factor 4 OS=Nicotiana sylvestris OX=4096 GN=ERF4 PE=2 SV=1	K	Transcription	ethylene-responsive transcription factor 4 [Oryza sativa Japonica Group]
BGIOSGA002820	32	52	49	296	345	567	2.55896	4.03075	3.91367	24.9717	24.679	46.1155	8.73441e-21	3.04653	up	--	--	--	--	--	--	--	--	--	--	--	hypothetical protein OsI_00467 [Oryza sativa Indica Group]
BGIOSGA011635	15546	10415	7110	19	0	17	386.401	253.666	179.951	0.490158	0	0.427993	0.000558106	-1.99472	down	--	--	Biological Process: metal ion transport (GO:0030001);; Molecular Function: metal ion binding (GO:0046872);;	--	--	[P]	Inorganic ion transport and metabolism	Heavy-metal-associated domain	Heavy metal-associated isoprenylated plant protein 7 OS=Arabidopsis thaliana OX=3702 GN=HIPP07 PE=1 SV=1	S	Function unknown	hypothetical protein OsI_09595 [Oryza sativa Indica Group]
BGIOSGA029786	4	4	0	63	75	78	0.268138	0.290856	0	4.88417	4.96506	5.85723	1.23694e-12	3.35334	up	--	--	--	--	--	--	--	--	--	--	--	hypothetical protein OsI_31313 [Oryza sativa Indica Group]
BGIOSGA001933	9	47	10	38	198	137	0.95046	5.11333	1.09448	4.4224	19.7066	15.5338	0.00527968	1.67282	up	--	--	Biological Process: response to acid chemical (GO:0001101);; Biological Process: regulation of transcription, DNA-templated (GO:0006355);; Biological Process: biological_process (GO:0008150);; Biological Process: response to endogenous stimulus (GO:0009719);; Biological Process: response to hormone (GO:0009725);; Biological Process: response to gibberellin (GO:0009739);; Biological Process: regul…	--	--	--	--	--	--	--	--	hypothetical protein OsI_01305 [Oryza sativa Indica Group]
BGIOSGA024765	605	884	978	2474	1556	1736	11.2376	16.0937	18.5026	48.601	25.8535	32.8146	1.17791e-08	1.39575	up	--	--	--	K15255|1.5e-21|zma:103638314|K15255 ATP-dependent DNA helicase PIF1 [EC:3.6.4.12] | (RefSeq) uncharacterized protein LOC103638314	--	--	--	--	--	--	--	hypothetical protein OsI_25012 [Oryza sativa Indica Group]
Oryza_sativa_newGene_2493	1264	1007	1271	269	202	307	36.8255	24.7697	27.9927	7.64908	5.21517	8.32357	7.72298e-20	-1.85263	down	--	--	--	--	--	--	--	--	--	--	--	hypothetical protein OsJ_25579 [Oryza sativa Japonica Group]
Oryza_sativa_newGene_1468	97	173	89	39	14	15	0.833713	1.46695	0.782044	0.357784	0.104241	0.124486	0.000706707	-1.66709	down	[X]	Mobilome: prophages, transposons	Molecular Function: nucleic acid binding (GO:0003676);; Molecular Function: zinc ion binding (GO:0008270);; Biological Process: DNA integration (GO:0015074);;	K03006|1.8e-109|adu:107466525|K03006 DNA-directed RNA polymerase II subunit RPB1 [EC:2.7.7.6] | (RefSeq) LOW QUALITY PROTEIN: DNA-directed RNA polymerase II subunit 1-like	RNA polymerase (ko03020)	[R]	General function prediction only	gag-polypeptide of LTR copia-type	Retrovirus-related Pol polyprotein from transposon TNT 1-94 OS=Nicotiana tabacum OX=4097 PE=2 SV=1	L	Replication, recombination and repair	H0512B01.8 [Oryza sativa]
BGIOSGA029787	9	4	15	84	56	48	0.702209	0.320085	1.26827	7.32408	4.10104	4.02928	1.61237e-05	2.15673	up	--	--	--	--	--	--	--	--	--	--	--	hypothetical protein OsI_31312 [Oryza sativa Indica Group]
BGIOSGA029118	542	1063	1105	1505	3113	1810	18.2912	35.1642	37.9884	53.7131	94.0045	62.1678	0.000552077	1.34996	up	--	--	Molecular Function: molecular_function (GO:0003674);; Molecular Function: catalytic activity (GO:0003824);; Molecular Function: ubiquitin-protein transferase activity (GO:0004842);; Biological Process: cellular protein modification process (GO:0006464);; Biological Process: proteolysis (GO:0006508);; Biological Process: ubiquitin-dependent protein catabolic process (GO:0006511);; Biological Proce…	K19045|2.0e-116|dosa:Os08t0548300-01|K19045 E3 ubiquitin-protein ligase BIG BROTHER and related proteins [EC:2.3.2.27] | (RefSeq) Os08g0548300; Zinc finger, RING/FYVE/PHD-type domain containing protein.	--	[O]	Posttranslational modification, protein turnover, chaperones	Ring finger domain	E3 ubiquitin ligase BIG BROTHER-related OS=Arabidopsis thaliana OX=3702 GN=BBR PE=2 SV=1	O	Posttranslational modification, protein turnover, chaperones	hypothetical protein OsI_30152 [Oryza sativa Indica Group]
BGIOSGA018534	106	141	137	302	463	343	3.41056	4.43216	4.4872	10.2952	13.3355	11.2342	4.37024e-08	1.65891	up	[R]	General function prediction only	Molecular Function: molecular_function (GO:0003674);; Molecular Function: catalytic activity (GO:0003824);; Cellular Component: cellular_component (GO:0005575);; Cellular Component: cell-cell junction (GO:0005911);; Biological Process: cellular aromatic compound metabolic process (GO:0006725);; Biological Process: biological_process (GO:0008150);; Biological Process: metabolic process (GO:0008152…	K21568|3.5e-180|dosa:Os12t0265100-01|K21568 pinoresinol/lariciresinol reductase [EC:1.23.1.1 1.23.1.2 1.23.1.3 1.23.1.4] | (RefSeq) Os12g0265100; Similar to Pinoresinol-lariciresinol reductase TH2.	Biosynthesis of various secondary metabolites - part 2 (ko00998)	--	--	NmrA-like family	Isoflavone reductase homolog OS=Lupinus albus OX=3870 PE=2 SV=1	S	Function unknown	isoflavone reductase homolog [Oryza sativa Japonica Group]
BGIOSGA024751	425	690	866	1031	2343	1695	26.6376	42.4118	55.282	68.3914	131.479	108.196	0.00018901	1.44184	up	--	--	Molecular Function: DNA binding (GO:0003677);; Molecular Function: zinc ion binding (GO:0008270);;	--	--	[R]	General function prediction only	A20-like zinc finger	Zinc finger A20 and AN1 domain-containing stress-associated protein 9 OS=Oryza sativa subsp. japonica OX=39947 GN=SAP9 PE=2 SV=1	S	Function unknown	zinc finger A20 and AN1 domain-containing stress-associated protein 9 isoform X1 [Oryza sativa Japonica Group]
BGIOSGA019593	0	5	0	129	66	156	0	0.201498	0	5.87584	2.53139	6.83926	2.40255e-15	3.81739	up	[R]	General function prediction only	--	K06990|2.1e-121|dosa:Os08t0299000-01|K06990 MEMO1 family protein | (RefSeq) Os08g0299000; Mediator of ErbB2-driven cell motility (Memo), related domain containing protein.	--	[R]	General function prediction only	Memo-like protein	--	S	Function unknown	hypothetical protein OsI_19410 [Oryza sativa Indica Group]
BGIOSGA024601	588	629	819	3009	69611	7535	37.3228	39.1222	52.98	202.059	3955.31	487.007	0.00521853	1.67734	up	--	--	Molecular Function: serine-type endopeptidase inhibitor activity (GO:0004867);; Molecular Function: IgE binding (GO:0019863);;	--	--	--	--	Protease inhibitor/seed storage/LTP family	17kDa alpha-amylase/trypsin inhibitor 2 OS=Oryza sativa subsp. japonica OX=39947 GN=Os07g0216700 PE=1 SV=1	S	Function unknown	17kDa alpha-amylase/trypsin inhibitor 2 [Oryza sativa Japonica Group]
BGIOSGA002761	137	105	105	11	24	28	6.27285	4.71774	4.88576	0.490197	0.984124	1.27843	7.28793e-05	-1.76803	down	--	--	--	K23335|6.5e-109|dosa:Os01t0144200-01|K23335 glucose-induced degradation protein 4 | (RefSeq) Os01g0144200; Vacuolar import and degradation protein Vid24 domain containing protein.	--	[U]	Intracellular trafficking, secretion, and vesicular transport	Vacuolar import and degradation protein	--	U	Intracellular trafficking, secretion, and vesicular transport	hypothetical protein OsI_00359 [Oryza sativa Indica Group]
BGIOSGA002177	395	303	218	393	647	583	5.18292	3.88966	2.91337	5.4509	7.59504	7.78258	0.00625611	1.00136	up	--	--	--	--	--	--	--	--	--	S	Function unknown	hypothetical protein OsI_00798 [Oryza sativa Indica Group]
BGIOSGA012101	46	53	78	89	240	136	1.903	2.13913	3.27665	3.89228	8.88145	5.72324	0.00596526	1.35544	up	--	--	Biological Process: mitotic cell cycle (GO:0000278);; Biological Process: mitotic cytokinesis (GO:0000281);; Biological Process: cytokinesis (GO:0000910);; Biological Process: cytokinesis by cell plate formation (GO:0000911);; Biological Process: response to acid chemical (GO:0001101);; Molecular Function: molecular_function (GO:0003674);; Molecular Function: SNAP receptor activity (GO:0005484);;…	K18211|3.0e-131|dosa:Os03t0212400-01|K18211 synaptosomal-associated protein 25 | (RefSeq) Os03g0212400; Similar to SNAP25 homologous protein SNAP29.	--	[U]	Intracellular trafficking, secretion, and vesicular transport	--	SNAP25 homologous protein SNAP33 OS=Arabidopsis thaliana OX=3702 GN=SNAP33 PE=1 SV=1	U	Intracellular trafficking, secretion, and vesicular transport	hypothetical protein OsI_10502 [Oryza sativa Indica Group]
Oryza_sativa_newGene_449	302	178	173	0	0	0	6.32753	3.67491	3.66381	0	0	0	7.26495e-31	-5.17141	down	--	--	--	--	--	--	--	--	--	--	--	hypothetical protein DAI22_02g127700 [Oryza sativa Japonica Group]
BGIOSGA008571	856	735	800	227	165	207	58.3854	49.0896	55.5694	16.3714	10.0365	14.343	2.40479e-21	-1.68617	down	--	--	Molecular Function: protein phosphatase inhibitor activity (GO:0004864);; Biological Process: regulation of signal transduction (GO:0009966);;	K16833|1.7e-44|obr:102720854|K16833 protein phosphatase inhibitor 2 | (RefSeq) protein phosphatase inhibitor 2-like	--	--	--	Protein phosphatase inhibitor 2 (IPP-2)	Protein phosphatase inhibitor 2 OS=Arabidopsis thaliana OX=3702 GN=I-2 PE=1 SV=1	S	Function unknown	hypothetical protein OsI_07962 [Oryza sativa Indica Group]
BGIOSGA001868	1095	883	588	31	19	26	30.6597	24.2074	16.7414	0.896146	0.455245	0.716781	5.39624e-49	-4.33786	down	--	--	--	K00423|5.3e-07|egr:104451286|K00423 L-ascorbate oxidase [EC:1.10.3.3] | (RefSeq) LOW QUALITY PROTEIN: L-ascorbate oxidase	Ascorbate and aldarate metabolism (ko00053)	--	--	--	F-box/LRR-repeat protein 13 OS=Arabidopsis thaliana OX=3702 GN=FBL13 PE=2 SV=1	--	--	hypothetical protein OsI_01460 [Oryza sativa Indica Group]
BGIOSGA014505	66	51	75	109	329	147	3.12949	2.36684	3.62015	5.46821	14.0393	7.12682	0.00188076	1.51636	up	--	--	Molecular Function: zinc ion binding (GO:0008270);;	K16281|9.3e-121|dosa:Os04t0579200-01|K16281 RING-H2 zinc finger protein RHA1 | (RefSeq) Os04g0579200; Zinc finger, RING/FYVE/PHD-type domain containing protein.	--	[O]	Posttranslational modification, protein turnover, chaperones	Ring finger domain	Brassinosteroid-responsive RING protein 1 OS=Arabidopsis thaliana OX=3702 GN=BRH1 PE=2 SV=1	O	Posttranslational modification, protein turnover, chaperones	hypothetical protein OsI_17090 [Oryza sativa Indica Group]
BGIOSGA022377	49	73	118	168	220	294	1.88034	2.76056	4.64926	6.90416	7.63254	11.627	0.000258565	1.51127	up	[R]	General function prediction only	Molecular Function: O-methyltransferase activity (GO:0008171);;	K00588|2.6e-141|dosa:Os06t0165800-01|K00588 caffeoyl-CoA O-methyltransferase [EC:2.1.1.104] | (RefSeq) Os06g0165800; Similar to Caffeoyl-CoA 3-O-methyltransferase (Fragment).	Phenylpropanoid biosynthesis (ko00940);; Flavonoid biosynthesis (ko00941);; Stilbenoid, diarylheptanoid and gingerol biosynthesis (ko00945)	[Q]	Secondary metabolites biosynthesis, transport and catabolism	O-methyltransferase	Caffeoyl-CoA O-methyltransferase 1 OS=Zea mays OX=4577 GN=CCOAOMT1 PE=2 SV=1	S	Function unknown	hypothetical protein OsI_21809 [Oryza sativa Indica Group]
BGIOSGA005286	464	390	306	21	71	62	3.78704	3.1194	2.54368	0.178547	0.513616	0.511428	3.02451e-07	-2.14408	down	--	--	Molecular Function: actin binding (GO:0003779);;	K19199|2.1e-143|osa:107276114|K19199 protein-histidine N-methyltransferase [EC:2.1.1.85] | (RefSeq) fructose-bisphosphate aldolase-lysine N-methyltransferase, chloroplastic-like isoform X1	--	--	--	KIP1-like protein	Protein NETWORKED 2A OS=Arabidopsis thaliana OX=3702 GN=NET2A PE=2 SV=1	S	Function unknown	hypothetical protein OsI_05430 [Oryza sativa Indica Group]
BGIOSGA030690	439	240	218	88	65	88	11.4516	6.14245	5.79058	2.41379	1.49606	2.32212	7.18309e-05	-1.45097	down	--	--	Molecular Function: protein binding (GO:0005515);;	--	--	--	--	F-box domain	FBD-associated F-box protein At5g18780 OS=Arabidopsis thaliana OX=3702 GN=At5g18780 PE=2 SV=2	--	--	hypothetical protein OsI_31233 [Oryza sativa Indica Group]
BGIOSGA034450	0	0	0	364	294	330	0	0	0	49.4611	33.8197	43.1398	5.40146e-59	6.48961	up	--	--	--	--	--	--	--	Protein of unknown function (DUF1138)	--	S	Function unknown	hypothetical protein OsI_35220 [Oryza sativa Indica Group]
BGIOSGA006370	187	142	125	16	20	23	2.50317	1.86545	1.70838	0.213409	0.237632	0.301135	2.36449e-10	-2.30338	down	[P]	Inorganic ion transport and metabolism	Molecular Function: potassium ion transmembrane transporter activity (GO:0015079);; Cellular Component: integral component of membrane (GO:0016021);;	K03549|0.0e+00|dosa:Os02t0518600-01|K03549 KUP system potassium uptake protein | (RefSeq) Os02g0518600, HIGH-AFFINITY_POTASSIUM(K+)_TRANSPORTER_19, HAK19; Similar to Potassium transporter 1 (OsHAK1). Splice isoform 2.	--	--	--	K+ potassium transporter	Potassium transporter 19 OS=Oryza sativa subsp. japonica OX=39947 GN=HAK19 PE=2 SV=1	P	Inorganic ion transport and metabolism	hypothetical protein OsI_07424 [Oryza sativa Indica Group]
BGIOSGA021040	17	22	18	70	723	252	0.634449	0.795967	0.666786	2.81964	24.7104	9.77672	1.45818e-08	2.88826	up	[R]	General function prediction only	--	K20728|1.8e-36|thj:104814965|K20728 vegetative storage protein 2 | (RefSeq) vegetative storage protein 2-like	MAPK signaling pathway - plant (ko04016)	--	--	HAD superfamily, subfamily IIIB (Acid phosphatase)	Acid phosphatase 1 OS=Solanum lycopersicum OX=4081 GN=APS1 PE=2 SV=1	S	Function unknown	hypothetical protein OsI_23372 [Oryza sativa Indica Group]
BGIOSGA007482	98	104	97	148	1929	1012	2.15282	2.24692	2.15604	3.43865	38.0229	22.6915	0.00333293	1.78226	up	--	--	Biological Process: polysaccharide biosynthetic process (GO:0000271);; Molecular Function: pattern binding (GO:0001871);; Molecular Function: molecular_function (GO:0003674);; Molecular Function: binding (GO:0005488);; Molecular Function: protein binding (GO:0005515);; Cellular Component: cellular_component (GO:0005575);; Cellular Component: intracellular (GO:0005622);; Cellular Component: cell (…	--	--	[G]	Carbohydrate transport and metabolism	Glycogen recognition site of AMP-activated protein kinase	Protein PTST, chloroplastic OS=Arabidopsis thaliana OX=3702 GN=PTST PE=1 SV=1	S	Function unknown	hypothetical protein OsI_05763 [Oryza sativa Indica Group]
BGIOSGA010137	865	1006	784	367	304	403	21.9663	25.0391	20.2713	9.84469	6.88729	10.3987	1.11813e-07	-1.01183	down	--	--	Molecular Function: serine-type endopeptidase activity (GO:0004252);; Cellular Component: integral component of membrane (GO:0016021);;	K09651|1.9e-13|ppp:112292274|K09651 rhomboid domain-containing protein 1 [EC:3.4.21.-] | (RefSeq) rhomboid-like protein 14, mitochondrial	--	[S]	Function unknown	Rhomboid family	Rhomboid-like protein 15 OS=Arabidopsis thaliana OX=3702 GN=RBL15 PE=1 SV=2	S	Function unknown	rhomboid-like protein 15 [Oryza sativa Japonica Group]
BGIOSGA013602	432	892	1787	3363	1680	2864	9.23564	18.707	38.9419	76.0883	32.1376	62.3463	0.00332473	1.32314	up	[QV]	Secondary metabolites biosynthesis, transport and catabolism;; Defense mechanisms	Molecular Function: monooxygenase activity (GO:0004497);; Molecular Function: iron ion binding (GO:0005506);; Molecular Function: oxidoreductase activity, acting on paired donors, with incorporation or reduction of molecular oxygen (GO:0016705);; Molecular Function: heme binding (GO:0020037);;	K13260|3.7e-117|qsu:112025878|K13260 isoflavone/4'-methoxyisoflavone 2'-hydroxylase [EC:1.14.14.90 1.14.14.89] | (RefSeq) cytochrome P450 81E8-like	Isoflavonoid biosynthesis (ko00943)	[Q]	Secondary metabolites biosynthesis, transport and catabolism	Cytochrome P450	Cytochrome P450 81Q32 OS=Catharanthus roseus OX=4058 GN=CYP81Q32 PE=2 SV=1	Q	Secondary metabolites biosynthesis, transport and catabolism	hypothetical protein OsI_13618 [Oryza sativa Indica Group]
BGIOSGA013182	0	0	0	48	39	45	0	0	0	1.91789	1.30366	1.70834	3.77535e-12	3.5321	up	--	--	Molecular Function: ADP binding (GO:0043531);;	--	--	--	--	Rx N-terminal domain	--	--	--	hypothetical protein OsI_12724 [Oryza sativa Indica Group]
BGIOSGA001451	17	21	18	36	109	61	0.297192	0.365756	0.313005	0.66902	1.72783	1.09468	0.00279328	1.59696	up	--	--	--	--	--	--	--	Neprosin	--	S	Function unknown	hypothetical protein OsI_02355 [Oryza sativa Indica Group]
BGIOSGA005263	51	37	61	92	890	603	2.52427	1.80042	3.09609	4.84462	39.8173	30.6883	4.59672e-07	2.54731	up	--	--	--	K22376|1.6e-13|sly:101265114|K22376 E3 ubiquitin-protein ligase KCMF1 [EC:2.3.2.27] | (RefSeq) protein DEHYDRATION-INDUCED 19 homolog 4	--	--	--	Drought induced 19 protein (Di19), zinc-binding	Protein DEHYDRATION-INDUCED 19 homolog 5 OS=Oryza sativa subsp. japonica OX=39947 GN=DI19-5 PE=2 SV=1	S	Function unknown	protein DEHYDRATION-INDUCED 19 homolog 5 [Oryza sativa Japonica Group]
BGIOSGA036336	683	771	787	134	90	116	41.5668	45.9731	48.7841	8.61996	4.86112	7.14641	3.20911e-35	-2.37165	down	--	--	Biological Process: polysaccharide catabolic process (GO:0000272);; Molecular Function: molecular_function (GO:0003674);; Molecular Function: catalytic activity (GO:0003824);; Cellular Component: cellular_component (GO:0005575);; Cellular Component: intracellular (GO:0005622);; Cellular Component: cell (GO:0005623);; Cellular Component: cytoplasm (GO:0005737);; Biological Process: carbohydrate me…	K15535|2.7e-59|dosa:Os12t0297500-01|K15535 phosphoglucan, water dikinase [EC:2.7.9.5] | (RefSeq) Os12g0297500; Pyruvate phosphate dikinase, PEP/pyruvate-binding domain containing protein.	--	--	--	--	Phosphoglucan, water dikinase, chloroplastic OS=Oryza sativa subsp. japonica OX=39947 GN=GWD3 PE=3 SV=2	--	--	hypothetical protein OsI_38057 [Oryza sativa Indica Group]
BGIOSGA029308	180	289	337	389	1088	660	4.31958	6.8072	8.24598	9.90202	23.4259	16.1712	0.000819155	1.44229	up	[M]	Cell wall/membrane/envelope biogenesis	Molecular Function: protein serine/threonine kinase activity (GO:0004674);; Molecular Function: ATP binding (GO:0005524);;	K08832|2.4e-245|dosa:Os09t0552300-01|K08832 serine/threonine-protein kinase SRPK3 [EC:2.7.11.1] | (RefSeq) Os09g0552300; Protein kinase, core domain containing protein.	--	[T]	Signal transduction mechanisms	Protein kinase domain	Serine/threonine-protein kinase AFC2 OS=Arabidopsis thaliana OX=3702 GN=AFC2 PE=1 SV=1	T	Signal transduction mechanisms	hypothetical protein OsI_32313 [Oryza sativa Indica Group]
BGIOSGA021118	365	362	349	166	83	99	5.55047	5.39814	5.395	2.65853	1.11644	1.5242	1.50899e-05	-1.27969	down	--	--	--	K07466|1.2e-28|dcr:108216988|K07466 replication factor A1 | (RefSeq) replication factor A protein 1-like	DNA replication (ko03030);; Nucleotide excision repair (ko03420);; Mismatch repair (ko03430);; Homologous recombination (ko03440)	[L]	Replication, recombination and repair	Replication factor-A C terminal domain	Replication protein A 70 kDa DNA-binding subunit A OS=Arabidopsis thaliana OX=3702 GN=RPA1A PE=1 SV=1	L	Replication, recombination and repair	hypothetical protein OsI_23219 [Oryza sativa Indica Group]
Oryza_sativa_newGene_6972	0	0	0	128	124	139	0	0	0	1.1239	0.975691	1.31888	1.26435e-31	5.17407	up	--	--	Molecular Function: protein serine/threonine kinase activity (GO:0004674);; Molecular Function: ATP binding (GO:0005524);; Cellular Component: integral component of membrane (GO:0016021);;	K13428|4.7e-17|csat:104770423|K13428 LRR receptor-like serine/threonine-protein kinase EFR [EC:2.7.11.1] | (RefSeq) LRR receptor-like serine/threonine-protein kinase EFR	Plant-pathogen interaction (ko04626)	--	--	Leucine rich repeat N-terminal domain	LRR receptor-like serine/threonine-protein kinase EFR OS=Arabidopsis thaliana OX=3702 GN=EFR PE=1 SV=1	T	Signal transduction mechanisms	hypothetical protein LOC_Os11g07120 [Oryza sativa Japonica Group]
BGIOSGA004779	192	173	199	19	0	6	7.43257	6.54883	7.83479	0.76583	0	0.224284	6.09571e-08	-2.76172	down	--	--	--	--	--	--	--	--	--	S	Function unknown	hypothetical protein OsI_04392 [Oryza sativa Indica Group]
BGIOSGA015680	0	0	2	528	447	443	0	0	0.014171	3.8796	2.77544	3.13368	6.07836e-72	6.75019	up	--	--	Molecular Function: ADP binding (GO:0043531);;	K15078|3.1e-66|tcc:18614561|K15078 structure-specific endonuclease subunit SLX1 [EC:3.6.1.-] | (RefSeq) putative disease resistance protein RGA3	--	[T]	Signal transduction mechanisms	NB-ARC domain	Putative disease resistance protein RGA4 OS=Solanum bulbocastanum OX=147425 GN=RGA4 PE=2 SV=1	S	Function unknown	Os11g0263000 [Oryza sativa Japonica Group]
BGIOSGA011840	261	308	270	54	78	149	7.56454	8.74637	7.96026	1.64855	2.02105	4.38997	0.00919981	-1.12557	down	--	--	Cellular Component: integral component of membrane (GO:0016021);; Biological Process: transmembrane transport (GO:0055085);;	K15277|7.5e-192|dosa:Os03t0118200-01|K15277 solute carrier family 35 (adenosine 3'-phospho 5'-phosphosulfate transporter), member B3 | (RefSeq) Os03g0118200; UAA transporter family protein.	--	[G]	Carbohydrate transport and metabolism	UAA transporter family	UDP-galactose/UDP-glucose transporter 2 OS=Arabidopsis thaliana OX=3702 GN=UTR2 PE=2 SV=1	EG	Amino acid transport and metabolism;; Carbohydrate transport and metabolism	hypothetical protein OsI_09974 [Oryza sativa Indica Group]
Oryza_sativa_newGene_965	91	100	78	155	172	182	2.25337	2.66377	2.0716	4.70956	4.42576	5.56337	0.000190878	1.10662	up	--	--	--	--	--	--	--	--	--	--	--	hypothetical protein [Oryza sativa Indica Group]
BGIOSGA019145	0	0	3	58	43	69	0	0	0.139748	2.89826	1.79479	3.30285	3.06372e-11	3.33933	up	--	--	Molecular Function: peroxidase activity (GO:0004601);; Biological Process: response to oxidative stress (GO:0006979);; Molecular Function: heme binding (GO:0020037);; Molecular Function: metal ion binding (GO:0046872);;	K00430|3.0e-26|osa:4337731|K00430 peroxidase [EC:1.11.1.7] | (RefSeq) peroxidase 5	Phenylpropanoid biosynthesis (ko00940)	--	--	Peroxidase	Peroxidase 1 OS=Zea mays OX=4577 GN=PER1 PE=1 SV=1	--	--	hypothetical protein OsI_18370 [Oryza sativa Indica Group]
BGIOSGA023192	19	32	47	145	176	52	0.493185	0.809638	1.26392	4.05268	4.1862	1.40722	0.00186891	1.6346	up	--	--	Cellular Component: ubiquitin ligase complex (GO:0000151);; Molecular Function: molecular_function (GO:0003674);; Molecular Function: binding (GO:0005488);; Molecular Function: protein binding (GO:0005515);; Cellular Component: cellular_component (GO:0005575);; Cellular Component: intracellular (GO:0005622);; Cellular Component: cell (GO:0005623);; Cellular Component: cytoplasm (GO:0005737);; Cel…	--	--	[R]	General function prediction only	Kelch motif	F-box/kelch-repeat protein At1g80440 OS=Arabidopsis thaliana OX=3702 GN=At1g80440 PE=2 SV=1	S	Function unknown	hypothetical protein OsI_23571 [Oryza sativa Indica Group]
Oryza_sativa_newGene_3113	598	516	366	135	240	179	7.37189	7.10158	4.94496	1.87701	2.69586	2.29116	0.00703144	-1.01196	down	--	--	--	--	--	--	--	--	--	--	--	hypothetical protein [Oryza sativa Japonica Group]
BGIOSGA014908	146	192	211	241	508	328	3.31282	4.29426	4.88803	5.81502	10.3758	7.60539	0.00589111	1.11302	up	--	--	Cellular Component: integral component of membrane (GO:0016021);;	--	--	--	--	--	--	--	--	hypothetical protein OsI_16266 [Oryza sativa Indica Group]
BGIOSGA024777	25	26	32	58	731	133	0.756287	0.776294	0.981971	1.86814	20.2482	4.18983	4.46851e-05	2.26194	up	[I]	Lipid transport and metabolism	Molecular Function: hydrolase activity (GO:0016787);;	K20506|6.6e-41|mus:103977527|K20506 tuliposide A-converting enzyme [EC:4.2.99.22] | (RefSeq) tuliposide A-converting enzyme 2, chloroplastic-like	--	[V]	Defense mechanisms	alpha/beta hydrolase fold	Probable carboxylesterase 15 OS=Arabidopsis thaliana OX=3702 GN=CXE15 PE=2 SV=1	I	Lipid transport and metabolism	hypothetical protein OsI_24993 [Oryza sativa Indica Group]
BGIOSGA008888	200	295	547	918	826	990	11.3785	16.4838	31.7862	55.3852	42.1524	57.5027	4.14541e-05	1.46756	up	[T]	Signal transduction mechanisms	--	--	--	--	--	Universal stress protein family	--	S	Function unknown	hypothetical protein OsI_08621 [Oryza sativa Indica Group]
Oryza_sativa_newGene_3733	36	33	48	426	434	493	0.509434	0.462251	0.70386	6.66597	6.83215	7.85386	3.14242e-47	3.54675	up	--	--	Molecular Function: nucleic acid binding (GO:0003676);; Molecular Function: exonuclease activity (GO:0004527);; Biological Process: DNA integration (GO:0015074);;	K03006|4.2e-83|adu:107466525|K03006 DNA-directed RNA polymerase II subunit RPB1 [EC:2.7.7.6] | (RefSeq) LOW QUALITY PROTEIN: DNA-directed RNA polymerase II subunit 1-like	RNA polymerase (ko03020)	[R]	General function prediction only	Reverse transcriptase (RNA-dependent DNA polymerase)	Retrovirus-related Pol polyprotein from transposon TNT 1-94 OS=Nicotiana tabacum OX=4097 PE=2 SV=1	T	Signal transduction mechanisms	retrotransposon protein, putative, Ty1-copia sub-class [Oryza sativa Japonica Group]
Oryza_sativa_newGene_3691	85	84	162	238	2867	1154	1.9628	2.11786	4.70858	6.51753	60.6368	28.4087	0.00247415	1.82671	up	--	--	--	--	--	--	--	--	--	--	--	hypothetical protein [Oryza sativa Japonica Group]
BGIOSGA023312	24	29	13	149	70	40	2.4913	3.03589	1.43093	16.9687	6.70631	4.30754	0.00288228	1.60543	up	--	--	Cellular Component: integral component of membrane (GO:0016021);; Biological Process: regulation of amino acid export (GO:0080143);;	--	--	--	--	--	--	S	Function unknown	hypothetical protein OsI_23802 [Oryza sativa Indica Group]
Oryza_sativa_newGene_7060	106	125	163	271	190	293	1.34399	1.56215	2.11961	4.00121	2.15948	3.78061	0.000335726	1.1001	up	--	--	--	--	--	--	--	--	--	--	--	hypothetical protein LOC_Os10g40210 [Oryza sativa Japonica Group]
BGIOSGA016042	2022	1435	1034	353	591	449	73.6462	51.228	38.3391	13.5902	19.2571	16.6341	0.000246035	-1.26393	down	--	--	Molecular Function: RNA binding (GO:0003723);;	--	--	[J]	Translation, ribosomal structure and biogenesis	Pumilio-family RNA binding repeat	Pumilio homolog 4 OS=Arabidopsis thaliana OX=3702 GN=APUM4 PE=1 SV=2	J	Translation, ribosomal structure and biogenesis	hypothetical protein OsI_15171 [Oryza sativa Indica Group]
BGIOSGA018902	175	104	106	470	278	575	2.98992	1.73622	1.84025	8.49532	4.24522	10.0021	3.91512e-08	1.81525	up	--	--	--	--	--	--	--	Ankyrin repeats (many copies)	--	S	Function unknown	hypothetical protein OsI_18267 [Oryza sativa Indica Group]
BGIOSGA011420	32	71	53	125	442	199	1.36702	2.97926	2.29032	5.65302	17.0185	8.70595	3.9648e-05	1.98683	up	--	--	Cellular Component: integral component of membrane (GO:0016021);;	K13993|2.4e-08|aly:110227759|K13993 HSP20 family protein | (RefSeq) inactive protein RESTRICTED TEV MOVEMENT 2	Protein processing in endoplasmic reticulum (ko04141)	--	--	Hsp20/alpha crystallin family	--	O	Posttranslational modification, protein turnover, chaperones	Putative small heat shock protein [Oryza sativa Japonica Group]
BGIOSGA014081	271	353	366	465	870	662	12.6343	16.1301	17.3606	22.9147	36.2616	31.3925	0.000448755	1.18432	up	--	--	Cellular Component: integral component of membrane (GO:0016021);;	K17345|3.2e-44|spen:107011065|K17345 tetraspanin-5 | (RefSeq) tetraspanin-19-like	--	--	--	Tetraspanin family	Tetraspanin-19 OS=Arabidopsis thaliana OX=3702 GN=TOM2AH3 PE=2 SV=1	S	Function unknown	tetraspanin-19 [Oryza sativa Japonica Group]
BGIOSGA025666	701	679	313	138	97	187	17.4928	16.6022	7.95684	3.62825	2.15385	4.74868	4.06226e-05	-1.53369	down	--	--	Cellular Component: cellular_component (GO:0005575);; Cellular Component: intracellular (GO:0005622);; Cellular Component: cell (GO:0005623);; Cellular Component: cytoplasm (GO:0005737);; Cellular Component: chloroplast (GO:0009507);; Cellular Component: plastid envelope (GO:0009526);; Cellular Component: chloroplast thylakoid (GO:0009534);; Cellular Component: chloroplast thylakoid membrane (GO:…	--	--	--	--	PAP_fibrillin	Probable plastid-lipid-associated protein 12, chloroplastic OS=Arabidopsis thaliana OX=3702 GN=PAP12 PE=1 SV=1	S	Function unknown	hypothetical protein OsI_25937 [Oryza sativa Indica Group]
BGIOSGA003828	93	85	100	0	0	0	7.20177	6.50372	7.9042	0	0	0	6.25655e-19	-4.2268	down	--	--	Molecular Function: alpha-1,2-mannosyltransferase activity (GO:0000026);; Molecular Function: glycolipid mannosyltransferase activity (GO:0004376);; Cellular Component: endoplasmic reticulum membrane (GO:0005789);; Biological Process: GPI anchor biosynthetic process (GO:0006506);;	K05286|1.9e-60|dosa:Os01t0580100-01|K05286 GPI mannosyltransferase 3 [EC:2.4.1.-] | (RefSeq) Os01g0580100; Alg9-like mannosyltransferase family protein.	Glycosylphosphatidylinositol (GPI)-anchor biosynthesis (ko00563)	[MO]	Cell wall/membrane/envelope biogenesis;; Posttranslational modification, protein turnover, chaperones	Alg9-like mannosyltransferase family	Mannosyltransferase APTG1 OS=Arabidopsis thaliana OX=3702 GN=APTG1 PE=2 SV=1	S	Function unknown	hypothetical protein OsI_02557 [Oryza sativa Indica Group]
BGIOSGA034650	2	15	18	63	55	65	0.070843	0.639481	0.835658	3.02742	2.2513	3.00328	0.00169449	1.76212	up	--	--	Cellular Component: integral component of membrane (GO:0016021);;	K20359|1.8e-106|osa:4351274|K20359 PRA1 family protein 1 | (RefSeq) PRA1 family protein B2	--	[U]	Intracellular trafficking, secretion, and vesicular transport	PRA1 family protein	PRA1 family protein B3 OS=Arabidopsis thaliana OX=3702 GN=PRA1B3 PE=1 SV=1	U	Intracellular trafficking, secretion, and vesicular transport	hypothetical protein OsI_34804 [Oryza sativa Indica Group]
BGIOSGA001690	270	246	203	0	0	0	12.2989	10.9455	9.40752	0	0	0	3.07305e-38	-5.54243	down	--	--	--	--	--	--	--	--	--	--	--	hypothetical protein OsI_01845 [Oryza sativa Indica Group]
BGIOSGA001400	74	103	182	882	708	778	4.24924	5.7631	10.5984	53.5195	36.3449	45.4204	1.31851e-18	2.68543	up	--	--	--	--	--	[S]	Function unknown	Eukaryotic protein of unknown function (DUF866)	--	S	Function unknown	hypothetical protein OsI_02460 [Oryza sativa Indica Group]
BGIOSGA028147	143	116	88	13	0	0	2.97674	2.37107	1.85983	0.282036	0	0	0.000551312	-2.02859	down	--	--	--	--	--	--	--	--	--	S	Function unknown	hypothetical protein OsI_28154 [Oryza sativa Indica Group]
Oryza_sativa_newGene_6616	243	271	224	100	56	65	12.1533	13.1927	11.2766	5.20954	2.51317	3.28985	4.35706e-06	-1.37227	down	--	--	--	--	--	--	--	--	--	--	--	hypothetical protein DAI22_10g062600 [Oryza sativa Japonica Group]
Oryza_sativa_newGene_1255	313	230	182	47	60	57	5.4998	3.96586	3.25883	0.86836	0.931507	1.01991	8.59346e-07	-1.67064	down	--	--	--	--	--	--	--	--	--	--	--	Os06g0354550 [Oryza sativa Japonica Group]
Oryza_sativa_newGene_5596	9	0	4	162	107	80	0.097356	0	0.037351	2.0274	1.12971	0.964982	1.63877e-11	3.26743	up	--	--	Molecular Function: zinc ion binding (GO:0008270);;	K00030|1.2e-14|adu:107459507|K00030 isocitrate dehydrogenase (NAD+) [EC:1.1.1.41] | (RefSeq) isocitrate dehydrogenase [NAD] catalytic subunit 6, mitochondrial-like	Citrate cycle (TCA cycle) (ko00020);; Carbon metabolism (ko01200);; 2-Oxocarboxylic acid metabolism (ko01210);; Biosynthesis of amino acids (ko01230)	--	--	MULE transposase domain	--	S	Function unknown	putative polyprotein [Oryza sativa Japonica Group]
BGIOSGA007452	2	1	1	975	835	824	0.024888	0.011904	0.009948	15.202	11.0175	12.3675	2.07213e-101	7.41441	up	--	--	--	--	--	--	--	Plant transposase (Ptta/En/Spm family)	--	S	Function unknown	HGWP repeat containing protein-like [Oryza sativa f. spontanea]
BGIOSGA005339	5368	4531	4690	1776	1350	1360	66.1498	54.7083	58.8384	23.1295	14.8742	17.0426	7.30681e-20	-1.40936	down	--	--	Molecular Function: ATP binding (GO:0005524);; Cellular Component: nucleus (GO:0005634);; Cellular Component: cytosol (GO:0005829);; Biological Process: carbohydrate metabolic process (GO:0005975);; Biological Process: cellular amino acid metabolic process (GO:0006520);; Cellular Component: membrane (GO:0016020);; Molecular Function: 1-phosphatidylinositol-4-phosphate 5-kinase activity (GO:001630…	K00889|0.0e+00|dosa:Os02t0822500-01|K00889 1-phosphatidylinositol-4-phosphate 5-kinase [EC:2.7.1.68] | (RefSeq) Os02g0822500; Similar to Junctophilin-2 (Junctophilin type 2) (JP-2).	Inositol phosphate metabolism (ko00562);; Phosphatidylinositol signaling system (ko04070);; Endocytosis (ko04144)	[T]	Signal transduction mechanisms	Phosphatidylinositol-4-phosphate 5-Kinase	Phosphatidylinositol 4-phosphate 5-kinase 9 OS=Arabidopsis thaliana OX=3702 GN=PIP5K9 PE=1 SV=2	T	Signal transduction mechanisms	hypothetical protein OsI_09497 [Oryza sativa Indica Group]
BGIOSGA003888	34	52	28	110	1213	248	0.520647	0.776419	0.433534	1.78103	16.6972	3.87727	0.0037555	1.76322	up	[P]	Inorganic ion transport and metabolism	Molecular Function: secondary active sulfate transmembrane transporter activity (GO:0008271);; Cellular Component: integral component of membrane (GO:0016021);;	K17471|0.0e+00|dosa:Os01t0593700-01|K17471 sulfate transporter 3 | (RefSeq) Os01g0593700; Sulphate transporter domain containing protein.	--	[P]	Inorganic ion transport and metabolism	Sulfate permease family	Probable sulfate transporter 3.5 OS=Arabidopsis thaliana OX=3702 GN=SULTR3;5 PE=2 SV=1	P	Inorganic ion transport and metabolism	hypothetical protein OsI_02669 [Oryza sativa Indica Group]
[truncated: 343 more rows]

## Sheet: Up-regulated DEGs
Table S3-2 The list of up-regulated DEGs identified in MXXZ-C vs. JXZ-C.
Gene ID	JXZ-C1_Count	JXZ-C2_Count	JXZ-C3_Count	MXXZ-C1_Count	MXXZ-C2_Count	MXXZ-C3_Count	JXZ-C1_FPKM	JXZ-C2_FPKM	JXZ-C3_FPKM	MXXZ-C1_FPKM	MXXZ-C2_FPKM	MXXZ-C3_FPKM	FDR	log2FC	regulated	COG_class	COG_class_annotation	GO_annotation	KEGG_annotation	KEGG_pathway_annotation	KOG_class	KOG_class_annotation	Pfam_annotation	Swiss-Prot_annotation	eggNOG_class	eggNOG_class_annotation	NR_annotation
[truncated: 715 more rows]

## Sheet: Down-regulated DEGs
Table S3-3 The list of down-regulated DEGs identified in MXXZ-C vs. JXZ-C.
[truncated: 445 more rows]
